# Supplementary material
Source: MDPI journal article supplement (https://www.mdpi.com/2073-4395/9/7/366)
Supplement: s1 [file s1]

Archive with 5 entries (5 files):
- Suplementary material 1,4,7.docx
- Suplementary material 2.xlsx
- Supplementary material 3.xlsx
- Supplementary Material 6_Manhattan graph and QQ plot graph.pdf
- Supplentary material 5.pdf
