# Supplementary material
Source: MDPI journal article supplement (https://www.mdpi.com/2073-4395/9/7/366)
Supplement: s1 [file s1 › Suplementary material 1,4,7.docx]

**Supplementary material 1**. Anthocyanins amount dendrogram of 109 accessions of *Solanum tuberosum* Group Phureja.


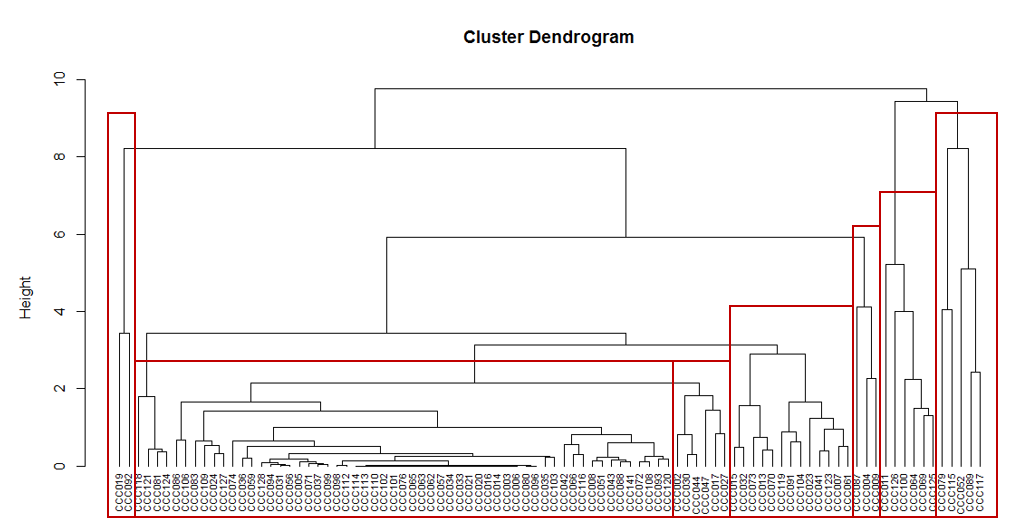


**Supplementary material 4**. Average concentration of individual anthocyanidins quantified by UHPLC of the six anthocyanidin concentration profiles for *Solanum tuberosum* Group Phureja expressed in mg/100 g dry matter (DM).

| **Group** | **Delphinidin** | **Cyanidin** | **Petunidin** | **Pelargonidin** | **Peonidin** | **Participation (%)** |
| --- | --- | --- | --- | --- | --- | --- |
| Group 1 | 0.57 ± 4.45 | 0.53 ± 8.93 | 1.84 ± 13.94 | 2.07 ± 17.12 | 1.55 ± 12.3 | 71.55 |
| Group 2 | 3.23 ± 3.15 | 1.13 ± 1.60 | 2.85 ± 8.73 | 25.62 ± 24.76 | 5.65 ± 3.26 | 9.17 |
| Group 3 | 6.19 ± 8.54 | 6.14 ± 8.23 | 33.84 ± 29.8 | 13.33 ± 8.26 | 12.69 ± 12.35 | 8.25 |
| Group 4 | 3.42 ± 1.06 | 2.73 ± 3.29 | 12.75 ± 9.2 | 76.70 ± 14.4 | 12.78 ± 8.96 | 3.67 |
| Group 5 | 8.96 ± 8.26 | 1.78 ± 1.31 | 0.96 ± 0.78 | 116.93 ± 65.8 | 15.99 ± 8.74 | 4.59 |
| Group 6 | 16.55 ± 3.74 | 13.89 ± 15.5 | 82.13 ± 23.5 | 5.65 ± 5.02 | 23.94 ± 11.41 | 2.75 |

**Supplementary material 7.** Linkage disequilibrium measure LD(r2) plotted vs. the potato physical map distance between all pairs SNP markers obtained with GBS methodology from the 10 and 11 chromosomes. The trend line of the LD decay is indicated in red.

Chromosome 11

Chromosome 10

**
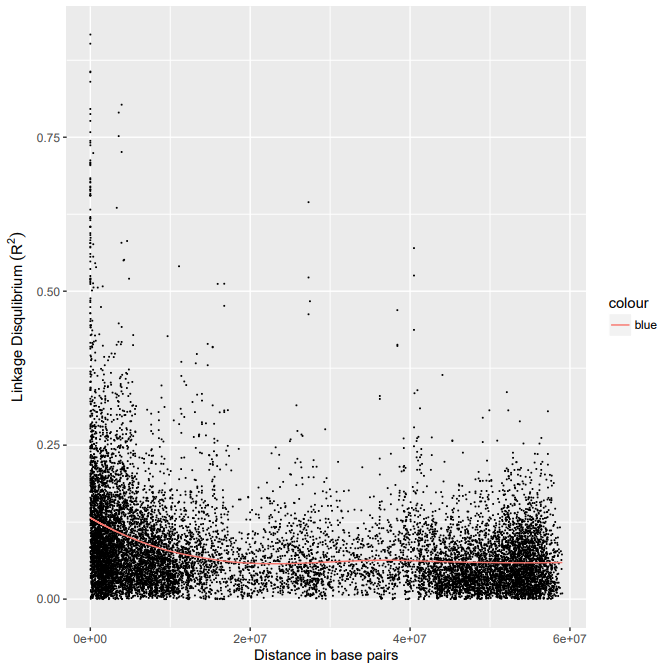

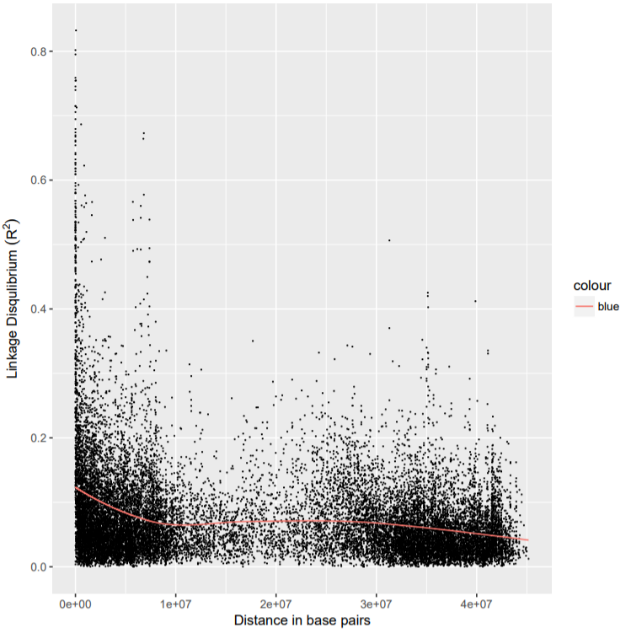
**
