# Supplementary material
Source: MDPI journal article supplement (https://www.mdpi.com/2073-4395/9/7/366)
Supplement: s1 [file s1 › Suplementary material 2.xlsx]

## Sheet: GBS Data
rs#	chrom	pos	CCC002	CCC003	CCC004	CCC005	CCC006	CCC007	CCC008	CCC009	CCC011	CCC013	CCC014	CCC015	CCC016	CCC017	CCC019	CCC020	CCC021	CCC023	CCC024	CCC027	CCC031	CCC032	CCC033	CCC034	CCC035	CCC037	CCC038	CCC041	CCC042	CCC043	CCC044	CCC045	CCC047	CCC051	CCC053	CCC056	CCC057	CCC059	CCC061	CCC062	CCC063	CCC065	CCC066	CCC069	CCC070	CCC071	CCC072
ST4.03ch01pos300640.1	1	300640	G/G	G/G	G/G	G/G	G/G	G/G	G/G	G/G	G/G	G/G	G/G	G/G	G/G	G/G	G/G	G/G	G/G	G/G	G/G	G/G	NA	G/G	G/G	G/G	G/G	G/G	G/G	G/G	G/G	NA	G/G	G/G	G/G	G/G	G/G	G/G	G/G	G/G	G/G	G/G	G/G	G/G	G/G	G/G	G/G	G/G	G/G
ST4.03ch01pos351732.1	1	351732	T/T	T/T	T/T	T/T	T/T	T/T	T/T	T/T	T/T	T/T	T/T	T/T	T/T	T/T	T/T	T/T	T/T	T/T	T/T	T/T	T/T	T/T	T/T	T/T	T/C	T/T	T/T	T/T	T/T	T/C	T/T	T/T	C/C	T/T	T/T	T/T	T/C	T/T	C/C	T/T	T/C	T/T	T/T	T/T	T/T	T/T	T/T
ST4.03ch01pos390094.1	1	390094	G/G	G/G	G/A	G/G	NA	G/G	G/A	G/G	G/G	G/G	G/G	G/G	G/A	G/G	G/A	G/A	A/A	G/A	A/A	G/G	NA	NA	G/A	NA	G/A	G/A	G/G	G/A	G/A	G/A	G/G	G/A	G/A	G/A	G/G	G/A	G/A	G/G	G/A	G/A	G/A	G/G	G/A	G/A	NA	G/A	G/G
ST4.03ch01pos390104.1	1	390104	G/G	G/G	G/T	G/G	NA	G/G	G/T	G/G	G/G	G/G	G/G	G/G	G/T	G/G	G/T	G/T	T/T	G/T	T/T	G/G	NA	NA	G/T	NA	G/T	G/T	G/G	G/T	G/T	G/T	G/G	G/T	G/T	G/T	G/G	G/T	G/T	G/G	G/T	G/T	G/T	G/G	G/T	G/T	NA	G/T	G/G
ST4.03ch01pos393237.1	1	393237	T/T	T/T	T/C	T/T	T/C	T/T	T/C	T/T	T/T	T/T	T/T	T/T	T/C	T/T	T/C	T/C	C/C	T/C	C/C	T/T	T/C	T/T	T/C	T/C	T/C	T/C	T/T	T/C	T/C	T/C	T/T	T/C	T/C	C/C	T/C	T/C	T/C	T/T	T/C	T/C	T/C	T/T	T/C	T/C	NA	T/C	T/T
ST4.03ch01pos436125.1	1	436125	T/C	T/C	T/C	C/C	T/C	C/C	T/C	C/C	C/C	C/C	C/C	C/C	T/C	C/C	T/C	T/C	T/T	T/C	T/T	T/C	T/C	NA	T/C	T/C	T/C	T/C	T/C	T/T	T/C	T/C	C/C	T/C	T/T	T/T	T/C	T/C	T/C	C/C	T/C	T/C	T/C	C/C	T/C	T/C	C/C	T/C	C/C
ST4.03ch01pos486668.1	1	486668	G/G	NA	NA	NA	NA	G/G	G/T	G/G	G/G	G/T	G/G	G/T	G/G	G/G	NA	G/G	G/G	G/T	G/G	G/T	NA	NA	NA	G/G	G/G	NA	G/G	G/G	NA	G/T	G/T	NA	NA	G/T	T/T	NA	G/T	T/T	G/G	G/G	G/G	T/T	NA	T/T	G/T	G/T	G/T
ST4.03ch01pos486681.1	1	486681	C/C	NA	NA	NA	NA	C/C	C/T	C/C	C/C	C/T	C/C	C/T	C/C	C/C	NA	C/C	C/C	C/T	C/C	C/T	NA	NA	NA	C/C	C/C	NA	C/C	C/C	NA	C/T	C/T	NA	NA	C/C	C/T	NA	NA	T/T	C/C	C/C	C/C	T/T	NA	T/T	C/T	C/T	C/T
ST4.03ch01pos486703.1	1	486703	A/A	NA	NA	NA	NA	A/A	A/T	A/A	A/A	A/T	A/A	A/T	A/A	A/A	NA	A/A	A/A	A/T	A/A	A/T	NA	NA	NA	A/A	A/A	NA	A/A	A/A	NA	A/T	A/T	NA	NA	A/T	T/T	NA	A/T	T/T	A/A	A/A	A/A	T/T	NA	T/T	A/T	A/T	A/T
ST4.03ch01pos486704.1	1	486704	G/G	NA	NA	NA	NA	G/G	G/T	G/G	G/G	G/T	G/G	G/T	G/G	G/G	NA	G/G	G/G	G/T	G/G	G/T	NA	NA	NA	G/G	G/G	NA	G/G	G/G	NA	G/T	G/T	NA	NA	G/T	T/T	NA	G/T	T/T	G/G	G/G	G/G	T/T	NA	T/T	G/T	G/T	G/T
ST4.03ch01pos549739.1	1	549739	C/C	C/C	C/A	C/A	C/A	C/C	C/A	C/C	C/C	C/A	C/A	C/A	C/C	C/C	C/A	C/C	C/A	C/A	C/A	C/A	C/C	NA	C/C	C/C	C/A	C/A	C/C	C/C	C/C	C/A	C/A	C/C	A/A	C/A	A/A	NA	C/A	A/A	A/A	C/C	C/A	A/A	C/A	A/A	C/A	C/A	C/A
ST4.03ch01pos549753.1	1	549753	G/G	G/G	G/T	G/T	G/T	G/G	G/T	G/G	G/G	G/T	G/T	G/T	G/G	G/G	G/T	G/G	G/G	G/T	G/G	G/T	G/G	NA	G/G	G/G	G/T	G/T	G/G	G/G	G/G	G/T	G/T	G/G	G/G	G/G	G/T	G/G	G/G	T/T	G/G	G/G	G/T	T/T	G/T	T/T	G/T	G/T	G/T
ST4.03ch01pos816301.1	1	816301	C/C	C/C	C/C	C/C	C/C	C/C	C/C	C/C	C/C	C/C	C/C	C/C	C/C	C/C	C/C	C/C	C/C	C/C	C/C	C/C	C/C	C/C	C/C	C/C	C/C	C/C	C/C	C/C	C/C	C/C	C/C	NA	C/C	C/C	C/C	C/C	C/C	C/C	C/C	C/C	C/C	C/C	C/C	C/C	C/C	C/C	C/C
ST4.03ch01pos816331.1	1	816331	T/T	T/T	T/T	T/T	T/T	T/T	T/T	T/T	T/T	T/T	T/T	T/T	T/T	T/T	T/T	T/T	T/T	T/T	T/T	T/T	T/T	T/T	T/T	T/T	T/C	T/T	T/T	T/T	T/T	T/T	T/T	NA	T/C	T/T	T/T	T/T	T/T	T/T	T/T	T/T	T/C	T/T	T/T	T/T	T/T	T/T	T/T
ST4.03ch01pos1012946.1	1	1012946	C/C	NA	C/T	C/C	C/C	C/C	C/T	C/C	C/C	C/C	C/C	C/C	C/C	C/C	C/T	C/C	C/T	C/T	C/T	C/C	C/T	C/C	C/C	C/C	C/C	C/T	C/C	C/T	C/T	C/T	C/C	C/T	C/C	T/T	C/C	C/T	C/T	C/C	C/C	C/T	C/C	C/C	C/T	C/C	C/C	C/T	C/C
ST4.03ch01pos1012961.1	1	1012961	T/T	NA	T/C	T/T	T/T	T/T	T/C	T/T	T/T	T/T	T/T	T/T	T/T	T/T	T/C	T/T	T/C	T/C	T/C	T/T	T/C	T/T	T/T	T/T	T/T	T/C	T/T	T/C	T/C	T/C	T/T	T/C	T/T	C/C	T/T	T/C	T/C	T/T	C/C	T/C	T/T	T/T	T/C	T/T	T/T	T/C	T/T
ST4.03ch01pos1013214.1	1	1013214	A/A	A/A	A/A	A/A	A/A	A/A	A/A	A/A	A/A	A/A	A/A	A/A	A/A	A/A	A/A	A/A	A/G	A/A	A/G	A/A	A/A	A/A	A/A	A/A	A/A	A/A	A/A	A/A	A/A	A/A	A/A	A/A	G/G	A/A	A/A	A/A	A/A	A/A	A/A	A/A	A/A	A/A	A/A	A/A	A/A	A/A	A/A
ST4.03ch01pos1071494.1	1	1071494	G/A	G/G	G/G	G/A	G/A	G/A	G/G	G/A	A/A	G/A	G/A	G/A	G/A	G/A	G/G	G/A	G/G	G/G	G/G	G/G	G/A	G/A	G/A	G/A	G/G	G/G	G/A	G/G	NA	G/A	G/A	G/A	G/G	G/G	G/G	G/A	G/A	G/A	G/G	G/G	G/G	G/A	G/G	G/G	G/A	G/G	G/A
ST4.03ch01pos1155095.1	1	1155095	T/T	T/T	T/T	T/T	T/T	T/T	T/T	T/T	T/T	T/T	T/T	T/T	T/T	T/T	T/T	T/T	T/T	T/T	T/T	T/T	T/T	T/T	T/T	T/T	T/T	T/T	T/T	T/T	T/T	T/T	T/T	T/T	T/T	T/T	T/T	T/T	T/T	T/T	A/A	T/T	T/T	T/T	T/T	T/T	T/T	T/T	T/T
ST4.03ch01pos1155526.1	1	1155526	T/T	T/T	T/T	A/T	T/T	T/T	T/T	T/T	T/T	T/T	A/T	T/T	A/T	T/T	T/T	A/T	A/T	T/T	T/T	A/T	T/T	T/T	A/T	A/T	A/T	T/T	T/T	T/T	T/T	A/T	T/T	T/T	A/T	T/T	T/T	T/T	T/T	T/T	T/T	A/T	A/T	T/T	T/T	T/T	T/T	T/T	T/T
ST4.03ch01pos1155529.1	1	1155529	A/A	A/A	A/A	A/A	A/A	A/A	A/A	A/A	A/A	A/A	A/A	A/A	A/A	A/A	A/A	A/A	A/A	A/A	A/A	A/A	A/A	A/A	A/A	A/A	A/A	A/A	A/A	A/A	A/A	A/A	A/A	A/A	A/A	A/A	A/A	A/A	A/A	A/A	A/A	A/A	A/A	A/A	A/A	A/A	A/A	A/A	A/A
ST4.03ch01pos1320987.1	1	1320987	T/T	T/T	T/T	C/T	T/T	T/T	T/T	T/T	T/T	T/T	C/T	T/T	C/T	T/T	T/T	C/T	C/T	T/T	NA	NA	NA	T/T	NA	C/T	T/T	T/T	T/T	NA	T/T	T/T	T/T	NA	C/T	T/T	T/T	NA	NA	T/T	C/T	NA	T/T	T/T	T/T	T/T	T/T	T/T	T/T
ST4.03ch01pos1321541.1	1	1321541	T/T	NA	T/T	C/T	T/T	T/T	T/T	T/T	T/T	T/T	C/T	T/T	C/T	T/T	T/T	C/T	C/T	T/T	T/T	C/T	NA	NA	NA	NA	T/T	T/T	T/T	T/T	T/T	NA	T/T	T/T	NA	T/T	T/T	T/T	T/T	T/T	C/T	C/T	T/T	T/T	T/T	T/T	T/T	T/T	T/T
ST4.03ch01pos1375348.1	1	1375348	C/C	NA	NA	C/T	C/C	C/T	C/C	C/T	C/C	C/C	C/T	C/C	C/T	C/T	C/C	C/T	C/C	C/T	C/T	C/T	NA	C/C	C/T	C/T	NA	C/C	C/C	C/C	NA	C/T	C/C	C/C	C/T	C/C	C/C	C/C	NA	C/C	T/T	C/T	C/T	C/C	C/T	C/C	C/C	C/C	C/C
ST4.03ch01pos1489427.1	1	1489427	G/G	G/G	G/G	G/G	G/G	G/G	G/G	G/G	G/G	G/G	G/G	G/G	G/G	G/G	G/G	G/G	A/G	G/G	G/G	G/G	NA	G/G	G/G	G/G	G/G	G/G	G/G	G/G	G/G	G/G	G/G	G/G	NA	G/G	G/G	G/G	NA	G/G	A/A	G/G	G/G	G/G	G/G	G/G	G/G	G/G	G/G
ST4.03ch01pos1505983.1	1	1505983	A/A	NA	NA	A/A	A/A	A/A	A/A	A/A	A/A	A/A	A/A	A/A	A/A	A/A	NA	A/A	A/A	A/A	A/A	A/A	NA	A/A	A/A	NA	A/A	A/A	A/A	A/A	A/A	A/G	A/A	A/A	NA	A/G	A/G	A/A	NA	A/A	G/G	A/A	A/A	A/A	A/A	A/G	A/A	A/A	A/A
ST4.03ch01pos1505984.1	1	1505984	A/A	NA	NA	A/A	A/A	A/A	A/A	A/A	A/A	A/A	A/A	A/A	A/A	A/A	NA	A/A	A/A	A/A	A/A	A/A	NA	A/A	A/A	NA	A/A	A/A	A/A	A/A	A/A	A/T	A/A	A/A	NA	A/T	A/T	A/A	NA	A/A	T/T	A/A	A/A	A/A	A/A	A/T	A/A	A/A	A/A
ST4.03ch01pos1506024.1	1	1506024	T/T	NA	NA	T/T	T/T	T/T	T/T	T/T	T/T	T/T	T/T	T/T	T/T	T/T	NA	T/T	T/T	T/T	T/T	T/T	NA	T/T	T/T	NA	T/T	T/T	T/T	T/T	T/T	T/C	T/T	T/T	NA	T/C	T/C	T/T	NA	T/T	C/C	T/T	T/T	T/T	T/T	T/C	T/T	T/T	T/T
ST4.03ch01pos1629311.1	1	1629311	T/T	T/T	T/T	T/T	T/T	T/T	T/T	T/T	T/T	T/T	T/T	T/T	T/T	T/T	T/T	T/T	T/T	T/T	T/T	T/T	T/T	T/T	T/T	T/T	T/T	T/T	T/T	NA	T/T	T/T	T/T	T/T	T/T	T/T	T/T	T/T	T/T	NA	T/T	T/T	T/T	T/T	T/T	T/T	T/T	T/T	T/T
ST4.03ch01pos1670451.1	1	1670451	T/T	T/T	T/T	T/T	T/T	T/T	T/T	T/T	T/T	T/T	T/T	T/T	T/T	T/T	T/T	T/T	T/T	T/T	T/T	T/T	T/T	T/T	T/T	T/T	T/T	T/T	T/T	T/T	T/T	T/A	T/T	T/T	T/A	T/A	T/A	T/T	T/A	T/T	T/A	T/T	T/T	T/T	T/T	T/T	T/T	T/T	T/T
ST4.03ch01pos1670458.1	1	1670458	T/T	T/T	T/T	T/T	T/T	T/T	T/T	T/T	T/T	T/T	T/T	T/T	T/T	T/T	T/T	T/T	A/T	T/T	T/T	T/T	T/T	T/T	T/T	T/T	A/T	T/T	T/T	T/T	T/T	A/T	T/T	T/T	T/T	T/T	T/T	T/T	NA	T/T	A/T	T/T	A/T	T/T	T/T	T/T	T/T	T/T	T/T
ST4.03ch01pos1679896.1	1	1679896	G/G	G/G	G/G	G/G	G/G	G/G	G/G	G/G	G/G	G/G	G/G	G/G	G/G	G/G	G/G	G/G	C/G	G/G	G/G	G/G	G/G	G/G	G/G	G/G	C/G	G/G	G/G	G/G	G/G	C/G	G/G	G/G	C/G	G/G	G/G	G/G	NA	G/G	C/C	G/G	C/G	G/G	G/G	G/G	G/G	G/G	G/G
ST4.03ch01pos1711197.1	1	1711197	A/A	A/A	A/A	A/A	A/A	A/A	A/A	A/A	A/A	A/A	A/A	A/A	A/A	A/A	A/A	A/A	G/A	A/A	A/A	A/A	A/A	A/A	A/A	A/A	G/A	A/A	A/A	A/A	A/A	G/A	A/A	A/A	G/A	G/A	G/A	A/A	NA	A/A	G/G	A/A	G/A	A/A	A/A	A/A	A/A	A/A	A/A
ST4.03ch01pos1719150.1	1	1719150	C/C	C/C	C/C	C/C	C/C	C/C	C/C	C/C	C/C	C/C	C/C	C/C	C/C	C/C	C/C	C/C	A/C	C/C	C/C	C/C	C/C	NA	C/C	NA	A/C	C/C	C/C	C/C	C/C	C/C	C/C	C/C	C/C	C/C	C/C	C/C	C/C	C/C	NA	C/C	A/C	C/C	C/C	C/C	C/C	C/C	C/C
ST4.03ch01pos1737506.1	1	1737506	G/G	G/G	G/G	G/G	G/G	G/G	G/G	G/G	G/G	G/G	G/G	G/G	G/G	G/G	G/G	G/G	G/G	G/G	G/G	G/G	G/G	G/G	G/G	G/G	G/C	G/G	G/G	G/G	G/G	G/C	G/G	G/G	G/G	G/C	G/C	G/G	G/C	G/G	G/G	G/G	G/C	G/G	G/G	G/G	G/G	G/G	G/G
ST4.03ch01pos1740381.1	1	1740381	A/A	A/A	A/A	A/A	A/A	A/A	A/A	A/A	A/A	A/A	A/A	A/A	A/A	A/A	A/A	A/A	T/A	A/A	A/A	A/A	A/A	A/A	A/A	A/A	T/A	A/A	A/A	A/A	A/A	T/A	A/A	A/A	A/A	A/A	A/A	A/A	A/A	A/A	T/T	A/A	T/A	A/A	A/A	A/A	A/A	A/A	A/A
ST4.03ch01pos1828527.1	1	1828527	C/C	C/C	C/C	C/C	C/C	C/C	C/C	C/C	C/C	C/C	C/C	C/C	G/C	C/C	C/C	G/C	C/C	C/C	C/C	C/C	C/C	C/C	G/C	G/C	C/C	C/C	C/C	C/C	C/C	G/C	C/C	C/C	G/C	G/C	G/C	C/C	NA	C/C	G/C	G/C	C/C	C/C	C/C	C/C	C/C	C/C	C/C
ST4.03ch01pos2080322.1	1	2080322	A/A	A/A	T/A	A/A	T/A	A/A	NA	A/A	A/A	A/A	A/A	A/A	T/A	A/A	T/T	T/A	A/A	T/A	NA	A/A	NA	NA	NA	T/A	T/A	T/A	A/A	A/A	T/A	T/A	T/A	T/A	T/T	T/T	T/T	T/A	T/A	T/A	T/A	T/T	T/A	T/A	T/A	T/T	T/A	T/T	T/A
ST4.03ch01pos2080325.1	1	2080325	G/G	G/G	G/A	G/G	G/A	G/G	G/A	G/G	G/G	G/G	G/G	G/G	G/A	G/G	NA	G/A	G/G	G/A	G/G	G/G	NA	G/G	NA	G/A	G/G	G/A	G/G	G/G	NA	G/A	G/A	G/G	G/G	G/G	G/A	G/G	G/G	G/A	G/A	G/A	G/G	G/A	G/A	G/A	G/G	G/A	G/A
ST4.03ch01pos2080329.1	1	2080329	C/C	C/C	C/C	C/C	C/C	C/C	T/C	C/C	NA	C/C	C/C	C/C	C/C	C/C	NA	C/C	C/C	C/C	NA	C/C	NA	NA	NA	C/C	C/C	C/C	C/C	C/C	NA	T/C	C/C	T/C	C/C	T/C	C/C	T/C	T/C	C/C	C/C	T/C	C/C	C/C	C/C	T/C	T/C	T/C	C/C
ST4.03ch01pos2452987.1	1	2452987	G/G	G/G	G/G	G/G	G/C	G/G	G/C	G/G	G/G	G/G	G/G	G/G	G/G	G/G	G/C	G/G	G/G	G/G	G/C	G/G	G/C	G/G	G/G	G/G	G/G	G/G	G/G	G/G	G/C	G/C	G/G	G/C	G/G	C/C	G/C	G/C	G/C	G/G	G/G	G/C	G/G	G/G	G/G	G/G	G/G	G/C	G/G
ST4.03ch01pos2452988.1	1	2452988	T/T	T/T	T/T	T/T	T/T	T/T	T/T	T/T	T/T	T/T	T/T	T/T	T/A	T/T	T/T	T/A	T/T	T/T	T/T	T/T	T/T	T/T	T/A	T/A	T/A	T/T	T/T	T/T	T/T	T/A	T/T	T/T	T/A	T/T	T/T	T/T	T/T	T/T	T/A	T/A	T/A	T/T	T/T	T/A	T/T	T/T	T/T
ST4.03ch01pos2452993.1	1	2452993	C/C	C/C	C/C	C/C	C/C	C/C	C/C	C/C	C/C	C/C	C/C	C/C	C/T	C/C	C/C	C/T	C/C	C/C	C/C	C/C	C/C	C/C	C/T	C/T	C/T	C/C	C/C	C/C	C/C	C/T	C/C	C/C	C/T	C/C	C/C	C/C	C/C	C/C	C/T	C/T	C/T	C/C	C/C	C/T	C/C	C/C	C/C
ST4.03ch01pos2453041.1	1	2453041	C/C	C/C	C/C	C/C	C/C	C/C	C/C	C/C	C/C	C/C	C/C	C/C	C/C	C/C	C/C	C/C	C/C	C/C	C/C	C/C	C/C	C/C	C/C	C/C	C/C	C/C	C/C	C/C	C/C	C/C	C/C	C/C	C/C	C/C	C/C	C/C	C/C	C/C	C/C	C/C	C/C	C/C	C/C	C/C	C/C	C/C	C/C
ST4.03ch01pos2453045.1	1	2453045	C/C	C/C	C/C	C/C	C/T	C/C	C/T	C/C	C/C	C/C	C/C	C/C	C/C	C/C	C/T	C/C	C/C	C/C	C/T	C/C	C/T	C/C	C/C	C/C	C/C	C/C	C/C	C/C	C/T	C/T	C/C	C/T	C/C	T/T	C/T	C/T	C/T	C/C	C/C	C/T	C/C	C/C	C/C	C/C	C/C	C/T	C/C
ST4.03ch01pos2549184.1	1	2549184	T/T	T/T	T/T	T/T	T/T	T/T	T/T	T/T	T/T	T/T	T/T	T/T	T/A	T/T	T/T	T/A	T/T	T/T	T/T	T/T	T/T	T/T	T/A	T/A	T/T	T/T	T/T	T/T	T/T	T/T	T/T	T/T	T/T	T/T	T/T	T/T	T/T	T/T	T/T	T/A	T/T	T/T	T/T	T/T	T/T	T/T	T/T
ST4.03ch01pos2556187.1	1	2556187	T/T	NA	C/T	C/T	C/T	T/T	C/T	T/T	T/T	C/T	C/T	C/T	C/T	T/T	C/C	C/T	C/T	C/T	C/T	C/T	NA	C/T	C/T	C/T	C/T	C/T	T/T	T/T	C/T	C/T	C/T	C/T	C/C	C/C	C/C	C/T	C/T	C/T	C/C	C/C	C/T	C/T	C/T	C/C	C/T	C/C	C/T
ST4.03ch01pos2556203.1	1	2556203	A/A	A/A	A/A	A/A	A/A	A/A	A/A	A/A	A/A	A/A	A/A	A/A	A/T	A/A	A/A	A/T	A/A	A/A	A/A	A/A	A/A	A/A	A/T	A/T	A/A	A/A	A/A	A/A	A/A	A/A	A/A	A/A	A/A	A/A	A/A	A/A	A/A	A/A	A/A	A/T	A/A	A/A	A/A	A/T	A/A	A/A	A/A
ST4.03ch01pos2556206.1	1	2556206	G/G	G/G	G/G	G/A	G/A	G/G	G/A	G/G	G/G	G/A	G/A	G/A	G/G	G/G	G/A	G/G	G/A	G/G	G/G	G/A	G/G	G/A	G/G	G/G	G/A	G/A	G/G	G/G	G/G	G/A	G/A	G/G	G/A	G/G	G/A	G/G	G/G	G/A	G/G	G/G	G/A	G/A	G/G	G/A	G/A	G/A	G/A
ST4.03ch01pos2556256.1	1	2556256	G/G	G/G	G/G	G/G	G/A	G/G	G/A	G/G	G/G	G/G	G/G	G/G	G/G	G/G	G/A	G/G	G/G	G/G	G/A	G/G	NA	NA	G/G	G/G	G/A	G/G	G/G	G/G	G/A	G/A	G/G	G/A	G/G	A/A	G/A	G/A	G/A	G/G	G/A	G/A	G/A	G/G	G/G	G/G	G/G	G/A	G/G
ST4.03ch01pos2556262.1	1	2556262	T/T	NA	C/T	C/T	C/T	T/T	C/T	T/T	T/T	C/T	C/T	C/T	C/T	T/T	C/C	C/T	C/T	C/T	C/T	C/T	NA	C/T	C/T	C/T	C/T	C/T	T/T	T/T	C/T	C/T	C/T	C/T	C/C	C/C	C/C	C/T	C/T	C/T	C/C	C/C	C/T	C/T	C/T	C/C	C/T	C/C	C/T
ST4.03ch01pos2772316.1	1	2772316	G/G	G/G	G/G	G/G	NA	A/G	A/G	G/G	G/G	G/G	G/G	G/G	G/G	A/G	G/G	G/G	G/G	G/G	G/G	G/G	A/G	G/G	G/G	G/G	A/G	G/G	A/G	G/G	A/G	A/G	G/G	A/G	G/G	A/G	G/G	A/G	A/G	G/G	G/G	A/G	A/G	G/G	G/G	A/G	G/G	A/G	G/G
ST4.03ch01pos2802881.1	1	2802881	T/T	T/T	T/T	T/C	T/C	T/T	T/C	T/T	T/C	T/C	T/C	T/C	T/C	T/T	T/C	T/C	T/C	T/T	T/T	T/C	T/T	T/C	T/C	T/C	T/T	T/C	T/T	T/T	T/T	T/C	T/C	T/T	C/C	T/T	T/C	T/T	NA	T/T	T/C	T/C	T/T	T/T	T/T	T/C	T/C	T/C	T/C
ST4.03ch01pos2822523.1	1	2822523	G/G	A/G	A/G	A/G	A/G	A/G	A/G	A/G	A/G	A/G	A/G	A/G	A/G	A/G	A/A	A/G	A/A	A/G	A/A	A/G	A/G	A/G	A/G	A/G	A/A	NA	A/G	A/A	A/G	A/G	A/G	A/G	A/A	A/A	A/A	A/G	A/G	A/G	A/A	A/A	A/A	A/G	A/G	A/A	A/G	A/A	A/G
ST4.03ch01pos2822561.1	1	2822561	A/A	A/A	A/A	A/A	A/G	A/A	A/A	A/G	A/A	A/A	A/A	A/A	A/A	A/A	A/A	A/A	A/A	A/A	A/A	A/A	A/A	A/A	A/A	A/A	A/A	A/A	A/A	A/G	A/G	A/G	A/A	A/A	A/G	A/G	A/G	A/G	A/G	A/G	A/A	A/A	A/A	A/G	A/A	A/A	A/A	A/A	A/A
ST4.03ch01pos2822564.1	1	2822564	C/C	C/C	C/C	C/C	C/T	C/C	C/C	C/T	C/C	C/C	C/C	C/C	C/C	C/C	C/C	C/C	C/C	C/C	C/C	C/C	C/C	C/C	C/C	C/C	C/C	C/C	C/C	C/T	C/T	C/T	C/C	C/C	C/T	C/T	C/T	C/T	C/T	C/T	C/C	C/C	C/C	C/T	C/C	C/C	C/C	C/C	C/C
ST4.03ch01pos2822603.1	1	2822603	A/A	A/A	A/A	A/A	A/G	A/A	A/A	A/G	A/A	A/A	A/A	A/A	A/A	A/A	A/A	A/A	A/A	A/A	A/A	A/A	A/A	A/A	A/A	A/A	A/A	A/A	A/A	A/G	A/G	A/G	A/A	A/A	A/A	A/G	A/G	A/G	A/G	A/G	A/A	A/A	A/A	A/G	A/A	A/A	A/A	A/A	A/A
ST4.03ch01pos2857176.1	1	2857176	C/C	C/C	C/C	C/C	C/T	C/C	C/C	C/T	C/C	C/C	C/C	C/C	C/C	C/C	C/C	C/C	C/C	C/C	C/C	C/C	C/C	C/C	C/C	C/C	C/C	C/C	C/C	C/T	C/T	C/T	C/C	C/C	C/T	C/T	C/T	C/T	C/C	C/T	C/C	C/C	C/C	C/T	C/C	C/C	C/C	C/C	C/C
ST4.03ch01pos3087288.1	1	3087288	G/G	NA	G/G	A/G	A/G	G/G	A/G	A/G	A/G	A/G	A/G	A/G	A/A	G/G	A/A	A/A	A/A	G/G	NA	A/G	NA	A/G	NA	A/A	A/A	A/A	G/G	A/A	A/G	A/G	A/G	NA	A/A	NA	A/A	A/G	NA	A/G	NA	A/A	A/A	A/G	G/G	A/A	A/G	A/A	A/G
ST4.03ch01pos3484961.1	1	3484961	A/A	G/A	G/A	G/A	A/A	A/A	A/A	A/A	A/A	A/A	G/A	A/A	A/A	A/A	A/A	A/A	G/A	G/A	A/A	A/A	A/A	A/A	A/A	A/A	G/A	G/A	A/A	G/A	G/A	NA	A/A	A/A	A/A	A/A	A/A	G/A	A/A	A/A	A/A	A/A	G/A	A/A	G/A	G/A	A/A	A/A	A/A
ST4.03ch01pos3484979.1	1	3484979	T/A	NA	T/T	T/A	A/A	T/A	T/A	A/A	A/A	A/A	T/A	A/A	T/A	T/A	T/A	T/A	T/A	T/T	T/T	T/A	T/A	NA	T/A	T/A	T/A	T/A	T/T	T/A	T/A	T/A	A/A	T/A	T/T	T/T	A/A	T/A	T/A	A/A	T/T	T/T	T/A	A/A	T/T	T/A	A/A	T/A	A/A
ST4.03ch01pos3484981.1	1	3484981	G/C	G/C	G/C	G/G	G/G	G/C	NA	G/G	G/G	G/G	G/G	G/G	G/C	G/C	G/G	G/C	G/G	G/C	C/C	G/C	G/C	NA	G/C	G/C	G/C	NA	C/C	G/G	G/C	G/C	G/G	G/C	G/C	C/C	G/G	G/C	G/C	G/G	C/C	C/C	G/C	G/G	G/C	G/G	G/G	G/G	G/G
ST4.03ch01pos3485022.1	1	3485022	A/G	NA	A/A	A/G	G/G	A/G	A/G	G/G	G/G	G/G	A/G	G/G	A/G	A/G	A/G	A/G	A/G	A/A	A/A	A/G	A/G	NA	A/G	A/G	A/G	A/G	A/A	A/G	A/G	A/G	G/G	A/G	A/A	A/A	G/G	A/G	A/G	G/G	A/A	A/A	A/G	G/G	A/A	A/G	G/G	A/G	G/G
ST4.03ch01pos3577730.1	1	3577730	A/A	NA	A/T	A/A	NA	A/A	A/T	A/A	A/A	A/A	A/A	A/A	A/T	A/A	A/T	NA	A/A	A/T	A/A	A/A	A/A	A/A	A/T	A/T	A/A	A/A	A/A	A/A	A/A	A/T	A/A	A/A	A/A	A/A	A/A	A/A	A/A	A/A	NA	A/A	A/A	A/A	A/T	A/A	A/A	A/T	A/A
ST4.03ch01pos3577747.1	1	3577747	G/G	NA	G/A	G/G	NA	G/G	G/A	G/G	G/G	G/G	G/G	G/G	G/A	G/G	G/A	NA	G/G	G/A	G/G	G/G	G/G	G/G	G/A	G/A	G/G	G/G	G/G	G/G	G/G	G/A	G/G	G/G	G/G	G/G	G/G	G/G	G/G	G/G	NA	G/G	G/G	G/G	G/A	G/G	G/G	G/A	G/G
ST4.03ch01pos3577812.1	1	3577812	C/C	NA	NA	C/C	NA	C/C	C/T	C/C	C/C	C/C	C/C	C/C	C/T	C/C	NA	NA	C/C	C/T	C/C	C/C	NA	C/C	NA	C/T	C/C	NA	C/C	C/C	NA	C/T	C/C	C/C	NA	C/C	C/C	C/C	C/C	C/C	C/C	C/C	C/C	C/C	C/T	C/C	C/C	C/T	C/C
ST4.03ch01pos3577813.1	1	3577813	T/T	NA	NA	T/T	NA	T/T	T/C	T/T	T/T	T/T	T/T	T/T	T/C	T/T	NA	NA	T/T	T/C	T/T	T/T	NA	T/T	NA	T/C	T/T	NA	T/T	T/T	NA	T/C	T/T	T/T	NA	T/T	T/T	T/T	T/T	T/T	T/T	T/T	T/T	T/T	T/C	T/T	T/T	T/C	T/T
ST4.03ch01pos3577825.1	1	3577825	T/T	NA	NA	NA	NA	T/T	T/C	T/T	T/T	T/T	T/T	T/T	T/C	T/T	NA	NA	T/T	T/C	T/T	T/T	NA	T/T	NA	T/C	T/T	NA	T/T	T/T	NA	T/C	T/T	T/T	NA	T/C	T/C	T/T	T/T	T/T	T/T	T/T	T/T	T/T	T/C	T/T	T/T	T/C	T/T
ST4.03ch01pos3577876.1	1	3577876	T/T	C/T	C/C	C/T	NA	C/T	C/T	T/T	C/T	T/T	C/T	T/T	C/C	C/T	NA	C/C	C/T	C/C	C/C	T/T	NA	T/T	C/C	C/C	C/T	C/T	C/T	C/T	C/T	NA	T/T	NA	NA	C/C	C/T	C/T	C/T	T/T	C/T	C/C	C/T	T/T	C/C	C/T	T/T	C/T	T/T
ST4.03ch01pos3577879.1	1	3577879	C/C	NA	T/C	T/C	C/C	T/C	C/C	C/C	T/C	C/C	T/C	C/C	T/C	T/C	C/C	NA	T/C	T/C	T/T	C/C	NA	C/C	NA	T/C	T/C	T/C	T/C	T/C	T/C	T/C	C/C	NA	NA	T/C	C/C	T/C	T/C	C/C	C/C	T/T	T/C	C/C	T/C	T/C	C/C	C/C	C/C
ST4.03ch01pos3580777.1	1	3580777	T/T	NA	NA	T/G	T/T	T/G	T/T	T/T	T/G	T/T	T/G	T/T	T/G	T/G	T/T	T/G	T/G	T/G	T/G	T/T	NA	NA	NA	T/G	T/G	T/G	T/G	T/G	T/G	T/G	T/T	T/G	NA	T/G	T/T	T/G	T/G	T/T	T/G	G/G	T/G	T/T	T/G	T/G	T/T	T/T	T/T
ST4.03ch01pos3580826.1	1	3580826	C/C	NA	G/G	G/C	NA	G/C	G/C	C/C	G/C	C/C	G/C	C/C	G/G	G/C	G/C	G/G	G/C	G/G	G/G	C/C	NA	NA	G/G	G/G	G/C	G/C	G/C	G/C	G/C	G/C	C/C	G/C	NA	G/G	G/C	G/C	G/C	C/C	G/C	G/G	G/C	C/C	G/G	G/C	G/C	G/C	C/C
ST4.03ch01pos3580853.1	1	3580853	A/A	NA	G/G	G/A	NA	G/A	G/A	A/A	G/A	A/A	G/A	A/A	G/G	G/A	G/A	G/G	G/A	G/G	G/G	A/A	NA	NA	G/G	G/G	G/A	G/A	G/A	G/A	G/A	G/A	A/A	G/A	NA	G/G	G/A	G/A	G/A	A/A	G/A	G/G	G/A	A/A	G/G	G/A	G/A	G/A	A/A
ST4.03ch01pos3616354.1	1	3616354	T/T	T/T	T/T	T/T	T/T	T/T	T/T	T/T	T/T	T/T	T/T	T/T	T/T	T/T	T/T	T/T	T/T	T/T	T/T	T/T	T/T	NA	T/T	T/T	C/T	T/T	T/T	T/T	T/T	C/T	T/T	T/T	NA	T/T	T/T	T/T	NA	T/T	C/C	T/T	C/T	T/T	T/T	C/T	T/T	T/T	T/T
ST4.03ch01pos3616362.1	1	3616362	G/G	G/G	G/G	G/G	G/A	G/G	G/A	G/G	G/G	G/G	G/G	G/G	G/A	G/G	G/A	G/A	G/G	G/A	G/G	G/G	G/G	NA	G/A	G/A	G/G	G/G	G/G	G/G	G/G	G/G	G/G	G/G	NA	G/G	G/G	NA	G/G	G/G	G/G	G/G	G/G	G/G	G/A	G/G	G/G	G/A	G/G
ST4.03ch01pos3616391.1	1	3616391	C/C	C/C	C/C	C/C	C/G	C/C	C/G	C/C	C/C	C/C	C/C	C/C	C/G	C/C	C/G	C/G	C/C	C/G	C/C	C/C	C/C	NA	NA	C/G	C/C	C/C	C/C	C/C	C/C	C/C	C/C	C/C	NA	C/C	C/C	NA	C/C	C/C	C/C	C/C	C/C	C/C	C/G	C/C	C/C	C/G	C/C
ST4.03ch01pos3616416.1	1	3616416	T/T	T/T	T/T	T/T	T/C	T/T	T/C	T/T	T/T	T/T	T/T	T/T	T/C	T/T	T/C	T/C	T/T	T/C	T/T	T/T	T/T	NA	T/C	T/C	T/T	T/T	T/T	T/T	T/T	T/T	T/T	T/T	NA	T/T	T/T	NA	T/T	T/T	T/T	T/T	T/T	T/T	T/C	T/T	T/T	T/C	T/T
ST4.03ch01pos3697834.1	1	3697834	C/C	C/C	C/C	C/C	C/C	C/C	C/C	C/C	C/C	C/C	C/C	C/C	C/T	C/C	C/C	C/T	C/C	C/C	C/C	C/C	C/C	C/C	C/T	C/T	C/T	C/C	C/C	C/C	C/C	C/C	C/C	C/C	C/T	C/C	C/C	C/C	C/C	C/C	C/C	C/T	C/T	C/C	C/C	C/C	C/C	C/C	C/C
ST4.03ch01pos3697845.1	1	3697845	T/T	T/T	T/T	T/T	T/T	T/T	T/T	T/T	T/T	T/T	T/T	T/T	T/C	T/T	T/T	T/C	T/T	T/T	T/T	T/T	T/T	T/T	T/C	T/C	T/T	T/T	T/T	T/T	T/T	T/T	T/T	T/T	T/T	T/T	T/T	T/T	T/T	T/T	T/T	T/C	T/T	T/T	T/T	T/T	T/T	T/T	T/T
ST4.03ch01pos3697847.1	1	3697847	C/C	C/C	C/C	C/C	C/C	C/C	C/C	C/C	C/C	C/C	C/C	C/C	C/A	C/C	C/C	C/A	C/C	C/C	C/C	C/C	C/C	C/C	C/A	C/A	C/C	C/C	C/C	C/C	C/C	C/C	C/C	C/C	C/C	C/C	C/C	C/C	C/C	C/C	C/C	C/A	C/C	C/C	C/C	C/C	C/C	C/C	C/C
ST4.03ch01pos3697860.1	1	3697860	C/C	C/C	C/C	C/C	C/C	C/C	C/C	C/C	C/C	C/C	C/C	C/C	C/G	C/C	C/C	C/G	C/C	C/C	C/C	C/C	C/C	C/C	C/G	C/G	C/C	C/C	C/C	C/C	C/C	C/C	C/C	C/C	C/C	C/C	C/C	C/C	C/C	C/C	C/C	C/G	C/C	C/C	C/C	C/C	C/C	C/C	C/C
ST4.03ch01pos3697878.1	1	3697878	C/C	C/C	C/C	C/C	C/C	C/C	C/C	C/C	C/C	C/C	C/C	C/C	C/C	C/C	C/C	C/C	C/C	C/C	C/C	C/C	C/C	C/C	C/C	C/C	C/T	C/C	C/C	C/C	C/C	C/C	C/C	C/C	C/T	C/C	C/C	C/C	C/C	C/C	C/C	C/C	C/T	C/C	C/C	C/C	C/C	C/C	C/C
ST4.03ch01pos3775868.1	1	3775868	T/C	NA	T/C	C/C	T/C	T/C	T/C	T/C	T/T	C/C	C/C	C/C	T/C	T/C	NA	T/C	C/C	T/C	T/T	T/C	NA	NA	NA	T/C	T/C	T/C	T/T	T/C	T/C	T/C	T/C	T/C	NA	T/T	C/C	T/C	T/C	T/C	T/C	T/T	T/C	T/C	T/C	C/C	NA	T/C	C/C
ST4.03ch01pos3775910.1	1	3775910	C/T	NA	C/T	T/T	C/T	C/T	C/T	C/T	C/C	T/T	T/T	T/T	T/T	C/T	NA	T/T	T/T	C/T	C/C	C/T	NA	NA	T/T	T/T	C/T	C/T	C/C	C/T	C/T	C/T	C/T	C/T	NA	C/C	T/T	C/T	C/T	C/T	C/T	C/T	C/T	C/T	C/T	T/T	NA	C/T	T/T
ST4.03ch01pos3776879.1	1	3776879	T/A	T/A	T/A	A/A	T/A	T/A	T/A	T/A	T/T	A/A	A/A	A/A	T/A	T/A	NA	T/A	A/A	NA	T/T	T/A	T/A	NA	NA	T/A	T/A	T/A	T/T	T/A	T/A	T/A	T/A	T/A	T/T	T/T	A/A	T/A	T/A	T/A	T/A	T/T	T/A	T/A	T/A	A/A	A/A	T/A	A/A
ST4.03ch01pos3776880.1	1	3776880	A/A	A/A	A/A	A/A	A/A	A/A	A/A	A/A	A/A	A/A	A/A	A/A	A/T	A/A	A/A	A/T	A/A	A/A	A/A	A/A	A/A	A/A	NA	A/T	A/A	A/A	A/A	A/A	A/A	A/A	A/A	A/A	A/A	A/A	A/A	A/A	A/A	A/A	A/A	A/T	A/A	A/A	A/A	A/A	A/A	A/A	A/A
ST4.03ch01pos3820208.1	1	3820208	A/A	T/A	T/T	NA	T/T	T/T	NA	T/T	T/T	NA	NA	NA	T/T	T/T	T/T	T/T	NA	T/T	T/T	A/A	T/T	NA	T/T	T/T	A/A	T/A	T/A	T/T	T/T	T/A	T/T	T/T	T/A	T/T	T/T	T/T	T/A	T/T	A/A	T/T	A/A	T/T	T/T	NA	T/T	T/T	NA
ST4.03ch01pos3820215.1	1	3820215	T/T	C/T	C/C	NA	C/C	C/C	NA	C/C	C/C	NA	NA	NA	C/C	C/C	C/C	C/C	NA	C/C	C/C	T/T	C/C	NA	C/C	C/C	T/T	C/T	C/T	C/C	C/C	C/T	C/C	C/C	NA	C/T	T/T	NA	C/T	C/C	T/T	C/C	T/T	C/C	C/C	NA	C/C	C/C	NA
ST4.03ch01pos3820310.1	1	3820310	A/A	C/A	C/C	NA	C/C	C/C	C/A	C/C	C/C	NA	NA	NA	C/C	C/C	C/C	C/C	NA	C/C	C/C	A/A	C/C	C/C	C/C	C/C	A/A	C/A	C/A	C/C	C/C	C/A	C/C	C/C	C/A	C/C	NA	C/C	NA	C/C	A/A	C/C	A/A	C/C	C/C	NA	C/C	C/C	NA
ST4.03ch01pos3820311.1	1	3820311	A/A	T/A	T/T	NA	T/T	T/T	T/A	T/T	T/T	NA	NA	NA	T/T	T/T	T/T	T/T	NA	T/T	T/T	A/A	T/T	T/T	T/T	T/T	A/A	T/A	T/A	T/T	T/T	T/A	T/T	T/T	T/A	T/T	NA	T/T	NA	T/T	A/A	T/T	A/A	T/T	T/T	NA	T/T	T/T	NA
ST4.03ch01pos3820342.1	1	3820342	A/A	G/A	G/G	NA	G/G	G/G	G/A	G/G	G/G	NA	NA	NA	G/G	G/G	G/G	G/G	NA	G/G	G/G	A/A	G/G	G/G	G/G	G/G	A/A	G/A	G/A	G/G	G/G	G/A	G/G	G/G	G/A	G/G	NA	G/G	NA	G/G	A/A	G/G	A/A	G/G	G/G	NA	G/G	G/G	NA
ST4.03ch01pos3836246.1	1	3836246	T/T	T/T	T/T	T/T	T/T	T/T	T/T	T/T	T/T	T/T	T/T	T/T	T/T	T/T	T/T	T/T	T/T	T/T	T/T	T/T	T/T	T/T	T/T	T/T	T/T	T/T	T/T	T/T	T/T	T/T	T/T	T/T	T/C	T/T	T/T	T/T	T/T	T/T	T/C	T/T	T/T	T/T	T/T	T/T	T/T	T/T	T/T
ST4.03ch01pos3836264.1	1	3836264	A/A	A/A	A/A	A/A	A/A	A/A	A/A	A/A	A/A	A/A	A/A	A/A	A/A	A/A	A/A	A/A	A/A	A/A	A/A	A/A	A/A	A/A	A/A	A/A	A/A	A/A	A/A	A/A	A/A	A/A	A/A	A/A	A/G	A/A	A/A	A/A	A/A	A/A	A/G	A/A	A/A	A/A	A/A	A/A	A/A	A/A	A/A
ST4.03ch01pos3836273.1	1	3836273	G/G	G/G	G/G	G/G	G/G	G/G	G/G	G/G	G/G	G/G	G/G	G/G	G/G	G/G	G/G	G/G	G/G	G/G	G/G	G/G	G/G	G/G	G/G	G/G	G/G	G/G	G/G	G/G	G/G	G/G	G/G	G/G	G/A	G/G	G/G	G/G	G/G	G/G	G/A	G/G	G/G	G/G	G/G	G/G	G/G	G/G	G/G
ST4.03ch01pos3912729.1	1	3912729	G/G	G/G	G/G	NA	G/G	G/G	G/G	NA	G/G	NA	NA	NA	A/A	G/G	G/G	A/A	NA	G/G	G/G	G/G	G/G	G/G	G/A	A/A	G/G	G/G	G/G	NA	G/G	G/G	G/G	G/G	G/G	G/G	G/G	G/G	G/G	NA	NA	G/A	G/G	NA	G/G	G/G	G/G	G/G	NA
ST4.03ch01pos3912736.1	1	3912736	A/A	A/A	A/A	NA	A/A	A/A	A/A	NA	A/A	NA	NA	NA	A/A	A/A	A/A	A/A	NA	A/A	A/A	A/A	A/A	A/A	A/A	A/A	G/G	A/A	A/A	NA	A/A	A/G	A/A	A/A	A/G	A/G	G/G	A/A	NA	NA	NA	A/A	G/G	NA	A/A	G/G	A/A	A/A	NA
ST4.03ch01pos3960178.1	1	3960178	T/T	T/T	T/T	T/T	T/C	T/T	T/T	T/T	T/T	T/T	T/T	T/T	T/T	T/T	T/T	T/T	T/T	T/T	T/T	T/T	T/T	T/T	T/T	T/T	T/C	T/T	T/T	T/C	T/C	T/T	T/T	T/T	T/T	T/T	T/T	T/C	T/T	T/C	T/T	T/T	T/C	T/C	T/T	T/T	T/T	T/T	T/T
ST4.03ch01pos3974163.1	1	3974163	G/A	NA	G/G	G/G	G/G	G/G	G/G	G/G	G/G	G/G	G/G	G/G	G/G	G/G	G/G	G/G	G/G	G/G	G/G	G/A	G/G	NA	G/G	G/G	G/A	NA	G/A	G/G	G/G	G/G	G/G	G/G	NA	G/G	G/G	G/G	G/G	G/G	G/G	G/G	G/A	G/G	G/G	G/G	G/G	G/G	G/G
ST4.03ch01pos3974193.1	1	3974193	A/A	NA	NA	A/G	A/A	A/A	NA	A/A	A/A	A/A	A/G	A/A	A/G	A/A	A/A	A/G	G/G	A/G	A/A	A/A	A/A	NA	A/G	A/G	NA	A/G	A/A	A/A	A/A	A/G	A/A	A/A	NA	A/A	A/A	NA	A/A	A/A	A/G	A/A	A/G	A/A	A/G	A/A	A/A	A/A	A/A
ST4.03ch01pos4258310.1	1	4258310	G/G	NA	G/A	G/A	G/G	G/A	G/G	G/A	A/A	G/G	NA	G/G	G/A	G/A	G/G	G/A	G/A	G/A	G/A	G/G	NA	NA	NA	G/A	G/A	A/A	G/A	G/G	G/A	G/A	G/A	G/A	NA	G/A	G/G	G/A	G/A	G/G	G/G	A/A	G/A	G/G	G/A	G/G	G/G	G/G	G/G
ST4.03ch01pos4522855.1	1	4522855	T/T	T/T	T/T	T/T	T/T	T/T	T/T	T/T	T/T	T/T	T/T	T/T	G/T	T/T	T/T	G/T	T/T	T/T	T/T	T/T	T/T	T/T	G/T	NA	G/T	T/T	T/T	T/T	T/T	NA	T/T	T/T	G/T	T/T	T/T	T/T	T/T	T/T	T/T	T/T	T/T	T/T	T/T	T/T	T/T	T/T	T/T
ST4.03ch01pos4522922.1	1	4522922	T/T	T/T	T/T	T/T	T/T	T/T	T/T	T/T	T/T	T/T	T/T	T/T	T/A	T/T	T/T	T/A	T/T	T/T	T/T	T/T	T/T	T/T	T/A	NA	T/A	T/T	T/T	T/T	T/T	T/T	T/T	T/T	T/T	T/T	T/T	T/T	T/T	T/T	T/T	T/T	T/T	T/T	T/T	T/T	T/T	T/T	T/T
ST4.03ch01pos4526156.1	1	4526156	A/A	A/A	A/A	A/A	A/A	A/A	NA	A/A	A/A	NA	A/A	NA	A/C	A/A	NA	A/C	A/C	A/A	A/A	A/A	NA	NA	NA	A/C	NA	A/A	NA	A/A	A/A	A/A	A/A	A/A	NA	A/A	A/A	A/A	A/A	A/A	A/C	A/A	A/C	NA	A/A	A/C	A/C	A/A	A/A
ST4.03ch01pos4596665.1	1	4596665	C/A	NA	C/C	NA	C/A	C/A	NA	C/A	C/C	C/A	C/A	C/A	C/C	C/A	NA	C/C	C/C	C/C	C/C	C/A	C/A	NA	C/C	C/C	C/A	C/C	C/C	C/A	NA	C/A	C/A	NA	C/C	C/C	C/A	C/A	C/A	C/A	C/C	C/C	C/A	C/A	C/C	C/A	C/A	C/A	C/A
ST4.03ch01pos4626250.1	1	4626250	T/T	T/T	NA	T/T	T/G	NA	NA	T/T	T/T	T/T	T/T	T/T	T/T	T/T	NA	T/T	T/T	T/T	T/T	T/T	T/T	NA	T/T	T/T	T/T	T/T	T/T	NA	T/G	NA	T/T	T/T	NA	T/T	T/T	T/G	T/T	NA	T/T	T/T	T/T	T/G	T/T	T/T	T/T	NA	T/T
ST4.03ch01pos4626264.1	1	4626264	A/A	A/G	NA	A/G	A/A	NA	NA	A/A	A/G	A/A	A/G	A/A	A/G	A/A	NA	A/G	A/G	A/G	NA	A/A	A/A	NA	A/G	NA	A/A	A/G	A/A	A/A	NA	A/G	A/G	NA	NA	A/G	A/A	A/G	A/G	A/A	A/G	A/G	A/A	A/A	NA	A/A	A/A	NA	A/A
ST4.03ch01pos4626279.1	1	4626279	G/G	G/G	NA	G/G	G/T	NA	NA	G/G	G/G	G/G	G/G	G/G	G/G	G/G	NA	G/G	G/G	G/G	G/G	G/G	G/G	NA	G/G	NA	G/G	G/G	G/G	NA	G/T	G/T	G/G	G/G	NA	G/G	G/G	G/T	NA	NA	G/G	G/G	G/G	G/T	G/G	G/G	G/G	NA	G/G
ST4.03ch01pos4626305.1	1	4626305	A/A	A/A	NA	A/A	A/G	NA	NA	A/A	A/A	A/A	A/A	A/A	A/A	A/A	NA	A/A	A/A	A/A	A/A	A/A	A/A	NA	A/A	NA	A/A	A/A	A/A	NA	A/G	A/G	A/A	A/A	NA	A/A	A/A	A/G	NA	NA	A/A	A/A	A/A	A/G	A/A	A/A	A/A	NA	A/A
ST4.03ch01pos4954982.1	1	4954982	C/T	C/T	C/C	C/T	C/T	C/T	C/T	C/T	C/C	C/T	C/T	C/T	C/C	C/T	C/T	C/C	C/C	C/C	C/C	C/T	C/T	C/T	C/C	C/C	C/C	C/C	C/C	C/T	C/T	C/T	C/T	C/T	C/C	C/C	C/T	C/T	C/T	C/T	C/C	C/C	C/C	C/T	C/C	C/T	C/T	C/T	T/T
ST4.03ch01pos4959733.1	1	4959733	T/T	T/T	T/T	T/T	T/T	T/T	T/T	T/T	T/T	T/T	T/T	T/T	T/T	T/T	T/T	T/T	T/T	T/T	T/T	T/T	T/T	T/T	T/T	T/T	A/T	T/T	T/T	T/T	T/T	NA	T/T	T/T	A/T	T/T	T/T	T/T	T/T	T/T	A/T	T/T	T/T	T/T	A/T	T/T	T/T	T/T	T/T
ST4.03ch01pos4959758.1	1	4959758	G/T	G/T	G/G	G/T	G/T	G/T	G/T	G/T	G/G	G/T	G/T	G/T	G/G	G/T	G/T	G/G	G/G	G/G	G/G	G/T	G/T	G/T	G/G	G/G	G/G	G/G	G/G	G/T	G/T	G/T	G/T	G/T	G/G	G/G	G/T	G/T	G/T	G/T	G/G	G/G	G/G	G/T	G/G	G/T	G/T	G/T	T/T
ST4.03ch01pos4959782.1	1	4959782	G/G	G/G	G/G	G/G	G/G	G/G	G/G	G/G	G/G	G/G	G/G	G/G	G/G	G/G	G/G	G/G	G/G	NA	G/G	G/G	G/G	G/G	G/G	G/G	C/G	G/G	G/G	G/G	G/G	NA	G/G	G/G	C/G	G/G	G/G	G/G	G/G	G/G	C/G	G/G	G/G	G/G	C/G	G/G	G/G	G/G	G/G
ST4.03ch01pos4959808.1	1	4959808	C/C	C/C	C/C	C/C	C/C	C/C	C/C	C/C	C/C	C/C	C/C	C/C	C/C	C/C	C/C	C/C	C/C	NA	C/C	C/C	C/C	C/C	C/C	C/C	T/C	C/C	C/C	C/C	C/C	NA	C/C	C/C	T/C	C/C	C/C	C/C	C/C	C/C	T/C	C/C	C/C	C/C	T/C	C/C	C/C	C/C	C/C
ST4.03ch01pos5096208.1	1	5096208	T/A	T/A	T/T	T/A	NA	T/A	T/A	T/A	T/T	T/A	T/A	T/A	T/T	T/A	T/A	T/T	T/T	T/T	T/T	T/A	T/A	T/A	T/A	T/T	T/T	T/T	NA	T/A	T/A	T/A	T/A	A/A	T/T	T/T	A/A	T/A	T/A	T/A	T/T	T/T	T/T	T/A	T/T	T/A	T/A	T/A	A/A
ST4.03ch01pos5096237.1	1	5096237	A/G	A/G	A/A	A/G	NA	A/G	A/G	A/G	A/A	A/G	A/G	A/G	A/A	A/G	A/G	A/A	A/A	A/A	A/A	A/G	A/G	A/G	A/G	A/A	A/A	A/A	NA	A/G	A/G	A/G	A/G	G/G	A/A	A/A	G/G	A/G	A/G	A/G	A/A	A/A	A/A	A/G	A/A	A/G	A/G	A/G	G/G
ST4.03ch01pos5096261.1	1	5096261	G/A	G/A	G/G	G/A	NA	G/A	G/A	G/A	G/G	G/A	G/A	G/A	G/G	G/A	G/A	G/G	G/G	G/G	G/G	G/A	G/A	G/A	G/A	G/G	G/G	G/G	NA	G/A	G/A	G/A	G/A	A/A	G/G	G/G	A/A	G/A	G/A	G/A	G/G	G/G	G/G	G/A	G/G	G/A	G/A	G/A	A/A
ST4.03ch01pos5161941.1	1	5161941	C/C	C/C	C/C	C/T	C/C	C/C	C/C	C/C	C/C	C/C	C/T	C/C	C/T	C/C	C/C	C/T	C/T	C/C	C/T	C/C	C/T	C/C	C/C	C/T	C/C	NA	C/C	C/C	C/T	NA	C/C	C/T	C/C	C/T	C/C	C/T	C/T	C/C	C/C	C/T	C/C	C/C	C/C	C/C	C/C	C/C	NA
ST4.03ch01pos5161963.1	1	5161963	C/C	C/C	T/C	C/C	C/C	C/C	C/C	C/C	C/C	C/C	C/C	C/C	C/C	C/C	C/C	C/C	C/C	T/C	T/C	C/C	C/C	C/C	C/C	C/C	T/C	C/C	C/C	C/C	C/C	C/C	C/C	C/C	T/C	C/C	C/C	C/C	C/C	C/C	C/C	C/C	T/C	C/C	T/C	C/C	C/C	C/C	NA
ST4.03ch01pos5162007.1	1	5162007	T/G	T/G	T/T	T/G	T/G	T/G	T/G	T/G	T/G	T/G	T/G	T/G	T/G	T/G	T/G	T/G	T/G	T/G	T/G	T/G	T/G	T/G	T/G	T/G	T/G	T/G	T/G	T/G	T/G	T/G	T/G	T/G	T/G	T/G	T/G	T/G	T/G	T/G	T/G	T/G	T/G	T/G	NA	T/T	T/G	T/G	NA
ST4.03ch01pos5162014.1	1	5162014	T/T	T/T	T/T	T/T	T/T	T/T	T/T	T/T	T/T	T/T	T/T	T/T	T/T	T/T	T/T	T/T	T/T	T/T	T/T	T/T	T/T	T/T	T/T	T/T	T/T	T/T	T/T	T/T	T/T	T/T	T/T	T/T	T/T	T/T	T/T	T/T	T/T	T/T	T/T	T/T	T/T	T/T	T/T	T/T	T/T	T/T	NA
ST4.03ch01pos5162383.1	1	5162383	C/T	C/T	C/T	C/T	C/T	C/T	C/T	C/T	C/T	C/T	C/T	C/T	C/T	C/T	C/T	C/T	C/T	C/T	C/T	C/T	C/T	C/T	C/T	C/T	C/T	C/T	C/T	C/T	C/T	C/T	C/T	C/T	C/T	C/T	C/T	C/T	C/T	C/T	C/T	C/T	C/T	C/T	C/T	C/T	C/T	C/T	C/C
ST4.03ch01pos5162384.1	1	5162384	C/T	C/T	C/T	C/C	C/T	C/T	C/T	C/T	C/T	C/T	C/C	C/T	C/T	C/T	C/T	C/T	C/T	C/T	C/C	C/T	C/C	C/T	C/T	C/T	C/T	C/T	C/T	C/T	C/T	C/T	C/T	C/C	C/T	C/T	C/T	C/T	C/C	C/T	C/T	C/C	C/T	C/T	C/T	C/C	C/T	C/T	C/C
ST4.03ch01pos5162388.1	1	5162388	A/G	A/G	A/G	A/G	A/G	A/G	A/G	A/G	A/G	A/G	A/G	A/G	A/G	A/G	A/G	A/G	A/G	A/G	A/G	A/G	A/G	A/G	A/G	A/G	A/G	A/G	A/G	A/G	A/G	A/G	A/G	A/G	A/G	A/G	A/G	A/G	A/G	A/G	A/G	A/G	A/G	A/G	A/G	A/G	A/G	A/G	A/A
ST4.03ch01pos5162393.1	1	5162393	G/G	G/A	G/A	G/A	G/G	G/G	G/G	G/G	G/G	G/G	G/A	G/G	G/A	G/G	G/G	G/A	G/A	G/A	G/A	G/G	G/A	G/G	G/A	G/A	G/A	G/A	G/G	G/G	NA	G/A	G/G	G/A	G/G	G/A	G/G	G/A	G/A	G/G	G/G	G/A	G/G	G/G	G/A	G/A	G/G	G/G	G/G
ST4.03ch01pos5162418.1	1	5162418	C/C	C/C	C/A	C/A	C/C	C/C	C/C	C/C	C/C	C/C	C/A	C/C	C/A	C/C	C/C	C/C	C/A	C/A	C/A	C/C	C/A	C/C	C/A	C/A	C/C	C/A	C/C	C/C	C/A	C/A	C/C	C/A	C/C	C/A	C/C	C/C	C/A	C/C	C/C	C/A	C/A	C/C	NA	C/A	C/C	C/C	C/C
ST4.03ch01pos5162421.1	1	5162421	T/C	T/C	T/C	T/C	T/C	T/C	T/C	T/C	T/C	T/C	T/C	T/C	T/C	T/C	T/C	T/C	T/C	T/C	T/C	T/C	T/C	T/C	T/C	T/C	T/C	T/C	T/C	T/C	T/C	T/C	T/C	T/C	T/C	T/C	T/C	T/C	T/C	T/C	T/C	T/C	T/C	T/C	T/C	T/C	T/C	T/C	T/T
ST4.03ch01pos5162424.1	1	5162424	C/T	C/T	C/T	C/C	C/T	C/T	C/T	C/T	C/T	C/T	C/C	C/T	C/T	C/T	C/T	C/T	C/T	C/T	C/C	C/T	C/C	C/T	C/T	C/T	C/T	C/T	C/T	C/T	C/T	C/T	C/T	C/C	C/T	C/T	C/T	C/T	C/C	C/T	C/T	C/C	C/T	C/T	C/T	C/C	C/T	C/T	C/C
ST4.03ch01pos5174999.1	1	5174999	T/C	T/C	T/C	T/C	T/C	T/C	T/C	T/C	C/C	T/C	T/C	T/C	T/C	T/C	T/C	T/C	T/C	T/C	T/C	T/C	T/C	T/C	T/C	T/C	T/C	T/C	C/C	T/C	T/C	T/C	T/C	T/C	T/C	T/C	T/C	T/C	T/C	T/C	C/C	T/C	T/C	T/C	T/C	T/T	T/C	T/C	T/T
ST4.03ch01pos5175008.1	1	5175008	C/C	C/C	C/C	C/T	C/C	C/C	C/C	C/C	C/C	C/C	C/T	C/C	C/T	C/C	C/C	C/T	C/T	NA	C/T	C/C	C/T	C/C	C/T	C/T	C/T	C/T	C/C	C/C	C/C	C/T	C/C	C/T	C/C	C/T	C/C	C/T	C/T	C/C	C/C	C/T	C/T	C/C	C/T	C/C	C/C	C/C	C/C
ST4.03ch01pos5175037.1	1	5175037	G/G	G/G	A/G	G/G	G/G	G/G	G/G	G/G	G/G	G/G	G/G	G/G	G/G	G/G	G/G	G/G	G/G	A/G	A/G	G/G	G/G	G/G	G/G	G/G	A/G	G/G	G/G	G/G	G/G	G/G	G/G	G/G	A/G	G/G	G/G	G/G	G/G	G/G	G/G	G/G	A/G	G/G	A/G	G/G	G/G	G/G	G/G
ST4.03ch01pos5175045.1	1	5175045	T/A	T/A	T/T	T/A	T/A	T/A	T/A	T/A	T/T	T/A	T/A	T/A	T/T	T/A	T/A	T/T	T/T	T/T	T/T	T/A	T/A	T/A	T/T	T/T	T/T	T/T	T/T	T/A	T/A	T/A	T/A	T/A	T/T	T/T	T/A	T/A	T/A	T/A	T/T	T/T	T/T	T/A	T/T	T/A	T/A	T/A	A/A
ST4.03ch01pos5175475.1	1	5175475	T/T	T/C	T/C	T/C	T/T	T/T	T/T	T/T	NA	T/T	T/C	T/T	C/C	T/T	T/T	C/C	C/C	T/C	T/C	T/T	T/C	T/T	T/C	C/C	T/C	C/C	NA	T/T	T/C	T/C	T/T	T/C	T/T	C/C	T/T	T/C	T/C	T/T	NA	C/C	T/C	T/T	T/C	T/C	T/T	T/T	T/T
ST4.03ch01pos5175479.1	1	5175479	A/A	A/G	A/G	A/G	A/A	A/A	A/A	A/A	NA	A/A	A/G	A/A	G/G	A/A	A/A	G/G	G/G	A/G	A/G	A/A	A/G	A/A	A/G	G/G	A/G	G/G	NA	A/A	A/G	A/G	A/A	A/G	A/A	G/G	A/A	A/G	A/G	A/A	NA	G/G	A/G	A/A	A/G	A/G	A/A	A/A	A/A
ST4.03ch01pos5175503.1	1	5175503	A/A	A/G	A/G	A/G	A/A	A/A	A/A	A/A	G/G	A/A	A/G	A/A	G/G	A/A	A/A	G/G	G/G	A/G	A/G	A/A	A/G	A/A	A/G	G/G	A/G	G/G	NA	A/A	A/G	A/G	A/A	A/G	A/A	G/G	A/A	A/G	A/G	A/A	NA	G/G	A/G	A/A	A/G	A/G	A/A	A/A	A/A
ST4.03ch01pos5175521.1	1	5175521	T/T	T/C	T/C	T/C	T/T	T/T	T/T	T/T	NA	T/T	T/C	T/T	C/C	T/T	T/T	C/C	C/C	T/C	T/C	T/T	T/C	T/T	T/C	C/C	T/C	C/C	NA	T/T	T/C	T/C	T/T	T/C	T/T	C/C	T/T	T/C	T/C	T/T	NA	C/C	T/C	T/T	T/C	T/C	T/T	T/T	T/T
ST4.03ch01pos5175536.1	1	5175536	T/T	T/C	T/C	T/C	T/T	T/T	T/T	T/T	C/C	T/T	T/C	T/T	C/C	T/T	T/T	C/C	C/C	T/C	T/C	T/T	T/C	T/T	T/C	C/C	T/C	C/C	NA	T/T	T/C	T/C	T/T	T/C	T/T	C/C	T/T	T/C	T/C	T/T	NA	C/C	T/C	T/T	T/C	T/C	T/T	T/T	T/T
ST4.03ch01pos5422267.1	1	5422267	A/A	G/A	G/A	A/A	A/A	A/A	A/A	A/A	A/A	A/A	A/A	A/A	A/A	A/A	A/A	A/A	G/G	G/A	NA	A/A	A/A	A/A	A/A	A/A	G/G	NA	A/A	A/A	A/A	G/A	A/A	A/A	G/G	A/A	A/A	A/A	G/A	A/A	A/A	A/A	G/G	A/A	NA	A/A	A/A	A/A	A/A
ST4.03ch01pos5439820.1	1	5439820	A/T	A/T	A/T	A/T	A/T	T/T	NA	T/T	A/T	T/T	A/T	T/T	T/T	T/T	T/T	T/T	A/A	A/T	A/A	A/A	A/T	NA	T/T	T/T	A/A	A/A	A/T	A/T	A/T	A/T	A/T	A/T	A/A	A/A	A/T	A/T	A/T	A/T	A/A	A/T	A/A	A/T	A/T	A/T	T/T	T/T	T/T
ST4.03ch01pos5439857.1	1	5439857	T/A	T/A	T/A	T/A	A/A	A/A	NA	A/A	A/A	A/A	T/A	A/A	A/A	A/A	A/A	A/A	T/T	T/A	T/T	T/A	T/A	NA	A/A	A/A	T/A	T/A	T/A	A/A	T/A	T/A	A/A	T/A	T/A	T/A	A/A	T/A	T/A	A/A	T/A	T/A	T/A	A/A	T/A	A/A	A/A	A/A	A/A
ST4.03ch01pos5507819.1	1	5507819	G/A	NA	G/G	G/A	G/A	G/A	G/A	G/A	G/G	A/A	G/A	A/A	A/A	G/A	G/A	A/A	G/G	G/G	G/G	G/G	G/A	NA	A/A	A/A	G/A	G/G	G/G	A/A	G/A	G/A	G/A	G/A	G/A	G/A	A/A	G/A	G/A	A/A	G/A	G/A	G/A	A/A	G/G	A/A	A/A	G/A	A/A
ST4.03ch01pos5870873.1	1	5870873	G/T	G/T	G/G	NA	G/G	G/T	G/G	G/T	G/G	G/G	G/T	G/G	NA	G/T	NA	G/G	G/G	G/G	G/G	G/G	T/T	G/T	G/G	G/G	NA	G/T	G/G	G/G	G/T	G/T	G/T	T/T	G/G	G/G	G/G	G/T	G/T	T/T	G/G	NA	G/G	T/T	G/G	G/G	G/G	G/G	NA
ST4.03ch01pos5870890.1	1	5870890	C/A	C/C	C/C	C/C	C/C	C/C	C/C	C/A	C/C	C/C	C/C	C/C	NA	C/C	NA	C/C	C/C	C/A	C/C	C/C	C/C	C/C	C/C	C/C	NA	C/C	C/C	C/C	C/C	C/C	C/C	C/C	C/C	C/C	C/C	C/C	C/C	C/C	C/C	NA	C/A	C/C	C/C	C/C	C/C	C/C	C/A
ST4.03ch01pos5870922.1	1	5870922	G/G	G/G	G/T	G/G	G/T	G/T	G/T	G/T	G/T	G/T	G/T	G/T	G/T	G/T	NA	G/G	G/G	G/T	G/G	G/G	G/G	G/G	G/G	G/G	NA	G/G	G/G	G/G	G/G	G/T	G/G	G/G	G/G	G/T	G/T	G/G	G/T	G/G	G/G	NA	G/T	G/G	G/T	T/T	G/T	T/T	NA
ST4.03ch01pos6144303.1	1	6144303	G/G	G/G	G/G	G/G	G/A	G/G	G/G	G/G	G/G	G/G	G/G	G/G	G/G	G/G	G/G	G/G	G/G	G/G	G/G	G/G	G/G	G/G	G/G	G/G	G/A	G/G	G/G	G/A	G/A	G/A	G/G	G/G	G/A	G/G	G/G	NA	G/G	G/A	G/A	G/G	G/A	G/A	G/G	G/G	G/G	G/G	G/G
ST4.03ch01pos6188115.1	1	6188115	C/A	C/A	C/A	A/A	A/A	A/A	C/A	A/A	C/A	C/A	A/A	C/A	C/A	A/A	A/A	C/A	C/A	C/A	C/A	C/A	A/A	A/A	C/A	C/A	A/A	C/A	C/A	A/A	NA	C/A	C/A	A/A	NA	A/A	A/A	C/A	C/A	A/A	C/A	A/A	A/A	A/A	C/A	C/A	C/A	A/A	A/A
ST4.03ch01pos6188123.1	1	6188123	C/C	C/C	C/C	C/C	C/T	C/C	C/C	C/C	C/C	C/C	C/C	C/C	C/C	C/C	C/C	C/C	C/C	C/C	C/C	C/C	C/C	C/C	C/C	C/C	C/T	C/C	C/C	C/T	C/T	C/T	C/C	C/C	NA	C/C	C/C	NA	C/C	C/T	C/T	C/C	C/T	C/T	C/C	C/C	C/C	C/C	C/C
ST4.03ch01pos6188141.1	1	6188141	C/T	C/T	C/T	T/T	C/T	T/T	C/T	T/T	C/T	C/T	T/T	C/T	C/T	T/T	T/T	C/T	C/T	C/T	C/T	C/C	T/T	T/T	C/T	C/T	C/T	C/T	C/T	C/T	C/T	C/T	C/T	T/T	C/C	C/T	C/T	C/T	C/T	C/T	C/C	T/T	C/T	C/T	C/T	C/T	C/T	T/T	T/T
ST4.03ch01pos6193621.1	1	6193621	T/T	T/T	T/T	C/C	C/C	NA	T/C	C/C	T/T	T/T	NA	T/T	T/T	C/C	NA	T/T	T/T	T/T	T/T	T/T	NA	T/T	T/T	T/T	C/C	T/T	T/T	C/C	NA	T/C	T/T	NA	NA	C/C	NA	T/C	C/C	C/C	T/T	C/C	C/C	C/C	NA	T/T	T/T	C/C	C/C
ST4.03ch01pos6193625.1	1	6193625	G/G	G/G	G/G	A/A	A/A	NA	G/A	A/A	G/G	G/G	NA	G/G	G/G	A/A	NA	G/G	G/G	G/G	G/G	G/G	NA	G/G	G/G	G/G	A/A	G/G	G/G	A/A	NA	G/A	G/G	NA	NA	G/A	G/A	G/A	A/A	A/A	G/G	A/A	A/A	A/A	NA	G/G	G/G	A/A	A/A
ST4.03ch01pos6193626.1	1	6193626	T/T	T/T	T/T	C/C	C/C	NA	T/C	C/C	T/T	T/T	NA	T/T	T/T	C/C	NA	T/T	T/T	T/T	T/T	T/T	NA	T/T	T/T	T/T	C/C	T/T	T/T	C/C	NA	T/C	T/T	NA	NA	C/C	NA	T/C	C/C	C/C	T/T	C/C	C/C	C/C	NA	T/T	T/T	C/C	C/C
ST4.03ch01pos6193642.1	1	6193642	G/G	G/G	G/G	T/T	NA	NA	G/T	T/T	G/G	G/G	NA	G/G	G/G	T/T	NA	G/G	G/G	G/G	G/G	G/G	NA	G/G	G/G	G/G	G/T	G/G	G/G	NA	NA	G/G	G/G	NA	G/G	T/T	NA	G/T	T/T	G/T	G/G	T/T	G/T	NA	G/G	G/G	G/G	T/T	T/T
ST4.03ch01pos6196201.1	1	6196201	G/G	G/G	G/G	G/G	T/G	G/G	G/G	G/G	G/G	G/G	G/G	G/G	G/G	G/G	G/G	G/G	G/G	G/G	G/G	NA	G/G	G/G	G/G	G/G	T/G	G/G	G/G	T/G	T/G	T/G	G/G	G/G	T/T	T/G	T/G	G/G	G/G	T/G	T/T	G/G	T/G	T/G	G/G	G/G	G/G	G/G	G/G
ST4.03ch01pos6295317.1	1	6295317	G/A	G/A	G/G	G/G	G/A	G/G	G/G	G/G	G/A	G/G	G/G	G/G	G/G	G/G	G/G	G/G	G/G	G/G	G/G	G/A	G/G	G/G	G/G	G/G	G/A	NA	G/A	G/A	NA	G/G	G/A	G/G	G/G	G/G	G/G	NA	G/G	G/A	G/A	G/G	G/A	G/A	G/G	G/A	G/G	G/G	G/G
ST4.03ch01pos6295668.1	1	6295668	T/G	T/G	T/T	T/T	T/G	T/T	T/G	T/T	T/G	T/T	T/T	T/T	T/T	T/T	T/T	T/T	T/T	T/T	T/T	T/G	T/T	T/T	T/T	T/T	T/G	T/G	T/G	T/G	T/G	T/G	T/G	T/T	T/G	T/G	T/G	T/G	T/T	T/G	T/G	T/T	T/G	T/G	T/T	T/G	T/T	T/T	T/T
ST4.03ch01pos6302538.1	1	6302538	A/T	A/T	A/A	A/A	A/T	A/A	A/T	A/A	A/T	A/A	A/A	A/A	A/A	A/A	A/A	A/A	A/A	A/A	A/A	A/T	A/A	A/A	A/A	A/A	A/T	A/T	A/T	A/T	A/T	A/T	A/T	A/A	A/T	A/T	A/T	A/T	A/A	A/T	A/T	A/A	A/T	A/T	A/A	A/T	A/A	A/A	A/A
ST4.03ch01pos6460917.1	1	6460917	A/G	A/G	A/A	A/A	A/G	A/A	A/A	A/A	A/G	A/A	A/A	A/A	A/A	A/A	A/A	A/A	A/A	A/A	A/A	A/G	A/A	A/A	A/A	A/A	A/G	NA	A/G	A/G	A/A	A/G	A/G	A/A	A/G	A/G	A/G	NA	A/A	A/G	A/G	A/A	A/G	A/G	A/A	A/G	A/A	A/A	A/A
ST4.03ch01pos6460918.1	1	6460918	T/A	T/A	T/T	T/T	T/A	T/T	T/T	T/T	T/A	T/T	T/T	T/T	T/T	T/T	T/T	T/T	T/T	T/T	T/T	T/A	T/T	T/T	T/T	T/T	T/A	NA	T/A	T/A	T/T	T/A	T/A	T/T	T/A	T/A	T/A	NA	T/T	T/A	T/A	T/T	T/A	T/A	T/T	T/A	T/T	T/T	T/T
ST4.03ch01pos6460936.1	1	6460936	A/T	A/T	A/A	A/A	A/T	A/A	A/A	A/A	A/T	A/A	A/A	A/A	A/A	A/A	A/A	A/A	A/A	A/A	A/A	A/T	A/A	A/A	A/A	A/A	A/T	NA	A/T	A/T	A/A	A/A	A/T	A/A	A/A	A/A	A/A	A/T	A/A	A/T	A/T	A/A	A/A	A/T	A/A	A/T	A/A	A/A	A/A
ST4.03ch01pos6589437.1	1	6589437	C/T	NA	C/C	C/C	C/T	C/C	NA	C/C	C/T	C/C	C/C	C/C	C/C	C/C	C/C	C/C	C/C	C/C	C/C	C/T	NA	C/C	C/C	C/C	C/T	NA	C/T	C/T	C/T	C/C	C/T	C/C	NA	C/C	C/C	C/T	C/C	C/T	C/T	C/C	C/T	C/T	C/C	C/T	C/C	C/C	C/C
ST4.03ch01pos6589444.1	1	6589444	C/T	NA	C/C	C/C	C/C	C/C	NA	C/C	C/T	C/C	C/C	C/C	C/C	C/C	C/C	C/C	C/C	C/C	C/C	C/T	NA	C/C	C/C	C/C	C/C	NA	C/T	C/C	C/C	C/C	C/T	C/C	C/C	C/C	C/C	C/C	C/C	C/C	C/C	C/C	C/C	C/C	C/C	C/T	C/C	C/C	C/C
ST4.03ch01pos6589453.1	1	6589453	T/G	NA	T/T	T/T	T/G	T/T	NA	T/T	T/G	T/T	T/T	T/T	T/T	T/T	T/T	T/T	T/T	T/T	T/T	T/G	NA	T/T	T/T	T/T	T/G	NA	T/G	T/G	T/G	T/T	T/G	T/T	NA	T/T	T/T	T/G	T/T	T/G	T/G	T/T	T/G	T/G	T/T	T/G	T/T	T/T	T/T
ST4.03ch01pos6589498.1	1	6589498	C/C	C/C	C/C	C/C	C/T	C/C	C/C	C/C	C/C	C/C	C/C	C/C	C/C	C/C	C/C	C/C	C/C	C/C	C/C	C/C	NA	C/C	C/C	C/C	C/T	C/C	C/C	C/T	C/T	C/C	C/C	C/C	NA	C/C	C/C	NA	C/C	C/T	C/T	C/C	C/T	C/T	C/C	C/C	C/C	C/C	C/C
ST4.03ch01pos7272441.1	1	7272441	G/C	G/C	G/C	C/C	G/C	C/C	G/C	C/C	C/C	C/C	C/C	C/C	G/C	C/C	C/C	G/C	G/C	G/C	G/C	G/C	C/C	C/C	G/C	G/C	G/G	G/C	G/C	G/C	G/C	G/C	C/C	C/C	G/C	G/C	G/C	G/C	C/C	G/C	C/C	G/C	G/G	G/C	G/C	C/C	C/C	C/C	C/C
ST4.03ch01pos7278119.1	1	7278119	T/C	T/C	T/T	T/T	T/T	T/T	NA	T/T	T/T	T/T	T/T	T/T	T/C	T/T	T/T	T/C	T/T	T/T	T/T	T/C	T/T	T/T	T/C	T/C	T/C	T/C	T/C	T/T	T/T	T/C	T/T	T/T	T/C	T/C	T/C	T/T	T/T	T/T	T/T	T/C	T/C	T/T	T/T	T/T	T/T	T/T	T/T
ST4.03ch01pos7281017.1	1	7281017	C/C	C/C	C/C	C/C	C/C	C/C	C/C	C/C	C/C	C/C	C/C	C/C	C/T	C/C	C/C	C/T	C/C	C/C	C/C	C/C	C/C	C/C	C/T	C/T	C/T	C/C	C/C	C/C	C/C	C/C	C/C	C/C	C/C	C/C	C/C	C/C	C/C	C/C	C/C	C/T	C/T	C/C	C/C	C/C	C/C	C/C	C/C
ST4.03ch01pos7281031.1	1	7281031	A/A	A/A	T/A	A/A	T/A	A/A	A/A	A/A	A/A	A/A	A/A	A/A	T/A	A/A	A/A	T/A	T/A	T/A	T/A	T/T	A/A	A/A	T/A	T/A	T/T	A/A	A/A	T/A	T/A	T/A	A/A	A/A	T/A	T/A	T/A	T/A	A/A	T/A	A/A	T/A	T/T	T/A	T/A	A/A	A/A	A/A	A/A
ST4.03ch01pos7281063.1	1	7281063	G/G	G/G	G/G	G/G	G/G	G/G	G/G	G/G	G/G	G/G	G/G	G/G	G/T	G/G	G/G	G/T	G/G	G/G	G/G	G/G	G/G	G/G	G/T	G/T	G/T	G/G	G/G	G/G	G/G	G/G	G/G	G/G	G/T	G/G	G/G	G/G	G/G	G/G	G/G	G/T	G/T	G/G	G/G	G/G	G/G	G/G	G/G
ST4.03ch01pos7281076.1	1	7281076	G/G	G/G	G/G	G/G	G/G	G/G	G/G	G/G	G/G	G/G	G/G	G/G	G/A	G/G	G/G	G/A	G/G	G/G	G/G	G/G	G/G	G/G	G/A	G/A	G/A	G/G	G/G	G/G	G/G	G/G	G/G	G/G	G/A	G/G	G/G	G/G	G/G	G/G	G/G	G/A	G/A	G/G	G/G	G/G	G/G	G/G	G/G
ST4.03ch01pos7281079.1	1	7281079	C/C	C/C	C/C	C/C	C/C	C/C	C/C	C/C	C/C	C/C	C/C	C/C	C/A	C/C	C/C	C/A	C/C	C/C	C/C	C/C	C/C	C/C	C/A	C/A	C/A	C/C	C/C	C/C	C/C	C/C	C/C	C/C	C/A	C/C	C/C	C/C	C/C	C/C	C/C	C/A	C/A	C/C	C/C	C/C	C/C	C/C	C/C
ST4.03ch01pos7281089.1	1	7281089	T/T	T/T	T/T	T/T	T/T	T/T	T/T	T/T	T/T	T/T	T/T	T/T	T/C	T/T	T/T	T/C	T/T	T/T	T/T	T/T	T/T	T/T	T/C	T/C	T/C	T/T	T/T	T/T	T/T	T/T	T/T	T/T	T/C	T/T	T/T	T/T	T/T	T/T	T/T	T/C	T/C	T/T	T/T	T/T	T/T	T/T	T/T
ST4.03ch01pos7281100.1	1	7281100	G/G	G/G	G/G	G/G	G/G	G/G	G/G	G/G	G/G	G/G	G/G	G/G	G/A	G/G	G/G	G/A	G/G	G/G	G/G	G/G	G/G	G/G	G/A	G/A	G/A	G/G	G/G	G/G	G/G	G/A	G/G	G/G	G/A	G/A	G/A	G/G	G/G	G/G	G/G	G/A	G/A	G/G	G/G	G/G	G/G	G/G	G/G
ST4.03ch01pos7411344.1	1	7411344	G/G	NA	A/G	G/G	G/G	G/G	G/G	G/G	G/G	G/G	G/G	G/G	G/G	G/G	G/G	G/G	A/G	A/G	A/G	G/G	G/G	G/G	G/G	G/G	A/G	G/G	G/G	G/G	G/G	G/G	G/G	G/G	G/G	A/G	A/G	G/G	G/G	G/G	G/G	G/G	A/G	G/G	A/G	G/G	G/G	G/G	G/G
ST4.03ch01pos7411350.1	1	7411350	A/A	A/C	A/C	A/C	A/C	A/C	A/C	A/C	C/C	A/C	A/C	A/C	A/C	A/C	A/C	A/C	A/C	A/C	A/C	A/A	A/C	A/C	A/C	A/C	A/C	A/C	A/C	A/C	A/C	A/C	A/C	A/C	A/A	A/C	A/A	A/C	A/C	A/C	C/C	A/C	A/C	A/C	A/C	A/C	A/C	A/C	A/A
ST4.03ch01pos7411386.1	1	7411386	G/A	G/A	G/G	G/A	G/A	G/A	G/A	G/A	G/G	G/A	G/A	G/A	G/G	G/A	G/A	G/G	G/G	G/G	G/G	G/A	G/A	G/A	G/G	G/G	G/G	G/A	G/G	G/A	G/A	G/A	G/A	G/A	G/A	G/G	G/A	G/A	G/A	G/A	G/G	G/G	G/G	G/A	G/G	G/A	G/A	G/A	A/A
ST4.03ch01pos8497048.1	1	8497048	T/A	T/A	T/A	T/T	T/T	T/T	NA	T/T	T/A	T/T	T/T	T/T	T/T	T/T	T/T	T/T	T/A	T/A	T/A	T/A	T/T	T/T	T/T	T/T	T/T	T/A	T/A	T/T	T/T	T/A	T/A	T/T	NA	T/T	T/T	NA	T/T	T/T	T/T	T/T	T/T	T/T	T/A	T/A	T/T	T/T	T/T
ST4.03ch01pos8615735.1	1	8615735	C/C	C/C	C/T	NA	C/T	NA	C/C	NA	C/C	C/T	C/C	C/T	C/C	NA	C/C	C/C	C/C	C/T	C/C	C/C	NA	NA	C/C	NA	T/T	NA	NA	C/T	C/T	C/T	C/C	C/C	NA	C/C	C/C	C/T	C/C	T/T	C/C	NA	T/T	T/T	C/T	C/T	C/T	C/C	C/C
ST4.03ch01pos8615778.1	1	8615778	C/C	NA	C/C	NA	C/T	NA	T/T	NA	C/C	C/T	C/C	C/T	C/C	NA	T/T	C/C	C/C	C/C	C/C	C/C	NA	NA	C/C	NA	C/C	NA	NA	C/T	NA	NA	C/C	C/C	NA	C/C	T/T	C/T	NA	C/C	C/C	NA	C/C	C/C	C/C	C/C	C/T	T/T	T/T
ST4.03ch01pos8615779.1	1	8615779	T/T	NA	NA	NA	T/T	NA	T/T	NA	T/T	T/T	A/A	T/T	T/T	NA	T/T	T/T	T/A	T/A	T/A	T/T	NA	NA	T/T	NA	T/T	NA	NA	T/T	T/A	T/A	T/T	A/A	NA	A/A	T/T	T/A	NA	T/T	A/A	NA	T/T	T/T	T/A	T/T	T/T	T/T	T/T
ST4.03ch01pos8615781.1	1	8615781	G/G	G/G	G/G	NA	G/G	NA	G/G	NA	G/G	G/G	G/G	G/G	A/A	NA	G/G	A/A	G/G	G/G	NA	G/G	NA	NA	A/A	NA	G/G	NA	NA	G/G	G/G	G/G	G/G	G/G	NA	G/G	G/G	G/G	G/G	G/G	G/G	NA	G/G	G/G	G/G	G/G	G/G	G/G	G/G
ST4.03ch01pos8615796.1	1	8615796	T/T	T/T	T/T	NA	T/A	NA	A/A	NA	T/T	T/A	T/T	T/A	T/T	NA	A/A	T/T	T/T	T/T	T/T	T/T	NA	NA	T/T	NA	T/T	NA	NA	T/A	NA	T/T	T/T	T/T	NA	T/T	A/A	T/A	NA	T/T	T/T	NA	T/T	T/T	T/T	T/T	T/A	A/A	A/A
ST4.03ch01pos8615804.1	1	8615804	C/C	C/C	C/C	NA	C/T	NA	T/T	NA	C/C	C/T	C/C	C/T	C/C	NA	T/T	C/C	C/C	C/C	NA	C/C	NA	NA	C/C	NA	C/C	NA	NA	C/T	NA	C/C	C/C	C/C	NA	C/C	T/T	C/T	NA	C/C	C/C	NA	C/C	C/C	C/C	C/C	C/T	T/T	T/T
ST4.03ch01pos8615808.1	1	8615808	A/A	NA	A/G	NA	G/G	NA	G/G	NA	A/A	G/G	G/G	G/G	G/G	NA	G/G	G/G	A/G	A/G	A/G	A/A	NA	NA	G/G	NA	G/G	NA	NA	G/G	G/G	A/G	A/A	G/G	NA	G/G	G/G	G/G	G/G	G/G	G/G	NA	G/G	G/G	A/G	A/G	G/G	G/G	G/G
ST4.03ch01pos8904260.1	1	8904260	C/C	C/C	C/C	C/C	C/C	C/C	C/C	C/C	C/C	C/C	C/C	C/C	C/T	C/C	C/C	C/T	C/C	C/C	C/C	C/T	C/C	NA	C/T	C/T	C/C	C/C	C/C	C/C	C/C	C/C	C/C	C/C	C/C	C/C	C/C	C/C	C/C	C/C	NA	C/T	C/C	C/C	C/C	C/C	C/C	C/C	C/C
ST4.03ch01pos8904286.1	1	8904286	G/G	G/G	G/G	G/G	G/G	G/G	G/G	G/G	G/G	G/G	G/G	G/G	G/A	G/G	G/G	G/A	G/G	G/G	G/G	G/A	G/G	NA	G/A	G/A	G/G	G/G	G/G	G/G	G/G	G/G	G/G	G/G	NA	G/G	NA	G/G	G/G	G/G	NA	G/A	G/G	G/G	G/G	G/G	G/G	G/G	G/G
ST4.03ch01pos8904308.1	1	8904308	T/T	T/T	T/T	T/T	T/T	T/T	T/T	T/T	T/T	T/T	T/T	T/T	T/G	T/T	T/T	T/G	T/T	T/T	T/T	T/G	T/T	NA	T/G	T/G	T/T	T/T	T/T	T/T	T/T	T/T	T/T	T/T	T/T	T/T	T/T	T/T	T/T	T/T	NA	T/G	T/T	T/T	T/T	T/T	T/T	T/T	T/T
ST4.03ch01pos9421738.1	1	9421738	A/T	A/T	A/T	A/T	A/T	A/A	A/T	A/A	A/T	A/A	A/T	A/A	T/T	A/A	A/T	T/T	A/T	A/T	A/T	A/A	A/T	NA	NA	T/T	A/A	A/A	A/A	T/T	A/T	A/T	A/T	NA	NA	A/A	A/T	A/T	A/T	A/A	T/T	T/T	A/A	A/A	A/T	A/T	A/A	A/T	A/T
ST4.03ch01pos9421773.1	1	9421773	C/C	C/C	C/C	C/C	C/C	C/C	C/C	C/C	C/C	A/A	C/C	A/A	C/C	C/C	C/C	C/C	C/C	C/C	C/C	NA	C/C	C/A	C/C	C/C	C/C	C/C	C/C	C/C	C/C	C/C	C/C	C/C	C/C	C/C	C/C	C/C	C/C	C/C	C/C	C/C	C/C	C/C	C/C	C/C	C/A	C/C	C/C
ST4.03ch01pos9421774.1	1	9421774	G/G	G/G	G/G	G/G	G/G	G/G	G/G	G/G	G/G	A/A	G/G	A/A	G/G	G/G	G/G	G/G	G/G	G/G	G/G	NA	G/G	G/A	G/G	G/G	G/G	G/G	G/G	G/G	G/G	G/G	G/G	G/G	G/G	G/G	G/G	G/G	G/G	G/G	G/A	G/G	G/G	G/G	G/G	G/G	G/A	G/G	G/G
ST4.03ch01pos9421786.1	1	9421786	A/T	A/T	A/T	A/T	A/T	A/A	A/T	A/A	A/T	A/A	A/T	A/A	T/T	A/A	A/T	T/T	A/T	A/T	A/T	A/A	A/T	NA	NA	T/T	A/A	A/A	A/A	T/T	A/T	A/T	A/T	A/T	A/T	A/A	A/T	A/T	A/T	A/A	A/T	NA	A/A	A/A	A/T	A/T	A/A	A/T	A/T
ST4.03ch01pos9421796.1	1	9421796	C/C	C/C	C/C	C/C	C/C	C/C	C/C	C/C	C/C	C/C	C/C	C/C	C/C	C/C	C/C	C/C	C/C	C/C	C/C	C/C	C/C	C/C	C/C	C/C	C/C	C/C	C/C	C/C	C/C	C/C	C/C	C/C	C/C	C/C	C/C	C/C	C/C	C/C	C/A	NA	C/C	C/C	C/C	C/C	C/C	C/C	C/C
ST4.03ch01pos9421797.1	1	9421797	C/C	NA	C/A	C/C	C/C	C/C	C/C	C/C	C/C	C/C	C/C	C/C	C/C	C/C	C/C	C/C	C/C	C/A	C/C	C/C	C/C	C/C	C/C	C/C	C/C	C/C	C/C	C/C	C/C	C/A	C/C	C/C	C/C	C/C	C/C	C/C	C/C	C/C	C/C	C/C	C/C	C/C	C/A	C/C	C/C	C/C	C/C
ST4.03ch01pos9789698.1	1	9789698	C/C	T/C	T/C	T/C	T/C	T/C	C/C	T/C	C/C	T/T	T/C	T/T	C/C	T/C	C/C	C/C	T/C	T/C	C/C	T/C	C/C	T/C	C/C	C/C	T/C	T/C	C/C	C/C	C/C	T/C	T/C	C/C	C/C	T/C	T/C	C/C	NA	T/T	C/C	C/C	T/C	T/T	T/C	T/C	T/C	C/C	T/C
ST4.03ch01pos10357635.1	1	10357635	T/C	T/C	T/C	T/C	T/C	T/T	T/C	T/T	T/C	T/T	T/C	T/T	C/C	T/T	T/C	C/C	T/C	T/C	T/C	T/C	T/C	T/T	C/C	C/C	T/T	T/T	T/C	C/C	T/C	T/C	T/C	T/C	T/C	T/T	T/C	T/C	T/C	T/T	C/C	C/C	T/T	T/T	T/C	T/C	NA	T/C	T/C
ST4.03ch01pos10357680.1	1	10357680	C/A	C/A	C/A	C/A	C/A	C/C	C/A	C/C	C/A	C/C	C/A	C/C	A/A	C/C	C/A	A/A	C/A	C/A	C/A	C/A	C/A	C/C	A/A	A/A	C/C	C/C	C/A	A/A	C/A	C/A	C/A	C/A	C/A	C/C	C/A	C/A	C/A	C/C	A/A	A/A	C/C	C/C	C/A	C/A	NA	C/A	C/A
ST4.03ch01pos10407271.1	1	10407271	T/G	T/G	T/G	T/G	T/G	T/T	T/G	T/T	T/G	T/T	T/G	T/T	G/G	T/T	T/G	NA	T/G	T/G	T/G	T/G	T/G	T/G	G/G	G/G	T/T	T/T	T/G	G/G	T/G	T/G	T/G	T/G	T/G	T/T	T/G	T/G	T/G	T/T	G/G	G/G	T/T	T/T	T/G	T/G	T/G	T/G	T/G
ST4.03ch01pos10407272.1	1	10407272	C/C	C/C	C/C	C/C	C/C	C/C	C/C	C/C	C/C	C/C	C/C	C/C	A/A	C/C	C/C	A/A	C/C	C/C	C/C	C/C	C/C	C/C	NA	NA	C/C	C/C	NA	C/A	C/A	C/C	C/C	C/C	NA	C/C	C/C	C/C	C/C	C/C	NA	NA	C/C	C/C	C/C	C/C	C/C	C/C	C/C
ST4.03ch01pos10407273.1	1	10407273	T/T	T/T	T/T	T/T	T/T	T/T	T/T	T/T	T/T	T/T	T/T	T/T	G/G	T/T	T/T	G/G	T/T	T/T	T/T	T/T	T/T	T/T	NA	NA	T/T	T/T	T/T	T/G	T/G	T/T	T/T	T/T	T/T	T/T	T/T	T/T	T/T	T/T	NA	NA	T/T	T/T	T/T	T/T	T/T	T/T	T/T
ST4.03ch01pos10407275.1	1	10407275	A/A	A/A	A/A	A/A	A/A	A/A	A/A	A/A	A/A	A/A	A/A	A/A	T/T	A/A	A/A	T/T	A/A	A/A	A/A	A/A	A/A	A/A	NA	NA	A/A	A/A	NA	A/T	A/T	A/A	A/A	A/A	NA	A/A	A/A	A/A	A/A	A/A	NA	NA	A/A	A/A	A/A	A/A	A/A	A/A	A/A
ST4.03ch01pos10407313.1	1	10407313	C/C	T/C	T/C	T/C	T/C	C/C	C/C	C/C	C/C	C/C	T/C	C/C	C/C	C/C	C/C	C/C	T/C	T/C	C/C	C/C	C/C	C/C	C/C	C/C	T/C	T/C	C/C	C/C	C/C	T/C	C/C	C/C	T/C	T/C	T/C	T/C	C/C	T/C	C/C	C/C	T/C	T/C	T/C	T/C	C/C	C/C	C/C
ST4.03ch01pos11278543.1	1	11278543	T/C	T/C	T/C	T/T	T/C	T/C	T/C	T/C	T/C	T/T	T/T	T/T	T/T	T/C	T/C	T/T	T/T	T/C	T/C	T/T	NA	NA	T/T	T/T	T/C	T/T	T/C	T/T	T/C	T/C	T/T	T/C	T/T	T/C	T/T	T/C	T/C	T/T	T/T	T/T	T/C	T/T	T/C	T/T	T/C	T/C	T/T
ST4.03ch01pos11278564.1	1	11278564	G/A	G/A	G/A	A/A	G/G	G/G	G/A	G/G	G/A	G/G	A/A	G/G	G/G	G/G	G/A	G/G	A/A	G/A	G/A	G/G	NA	G/A	G/G	G/G	G/A	G/A	G/G	G/A	G/A	G/A	G/A	G/A	NA	G/A	A/A	G/A	G/A	G/G	G/A	G/G	G/A	G/G	G/A	G/G	NA	G/A	G/A
ST4.03ch01pos11278616.1	1	11278616	C/A	C/A	C/A	C/C	C/A	C/A	C/A	C/A	C/A	C/C	C/C	C/C	C/C	C/A	C/A	C/C	C/C	C/A	C/A	C/C	NA	NA	C/C	C/C	C/A	C/C	C/A	C/C	C/A	C/A	C/C	C/A	C/A	C/A	C/C	C/A	C/A	C/C	C/C	C/C	C/A	C/C	C/A	C/C	C/A	C/A	C/C
ST4.03ch01pos13616331.1	1	13616331	T/T	NA	T/T	T/T	T/T	T/T	T/T	T/T	T/T	T/T	T/T	T/T	T/C	T/T	T/T	T/C	T/T	T/T	T/T	T/T	NA	T/T	NA	T/C	T/T	T/T	T/T	T/T	T/T	T/T	T/T	T/T	T/C	T/T	T/T	T/T	T/T	T/T	T/T	T/C	T/T	T/T	T/T	T/T	T/T	T/T	T/T
ST4.03ch01pos13664361.1	1	13664361	C/C	NA	C/A	C/C	C/C	C/C	C/A	C/C	C/C	C/A	C/C	C/A	A/A	C/C	C/C	A/A	C/C	C/A	C/C	C/A	C/C	C/A	C/A	A/A	C/C	NA	C/A	C/C	C/C	C/A	C/C	C/C	C/A	C/A	C/A	NA	C/A	C/C	C/C	C/A	C/C	C/C	C/A	C/C	C/A	C/C	C/C
ST4.03ch01pos14348152.1	1	14348152	A/G	A/G	A/G	A/A	A/G	A/G	A/G	A/G	A/G	A/A	A/A	A/A	A/G	A/G	A/G	A/G	A/A	A/G	A/A	A/A	A/A	A/A	A/G	A/G	A/A	A/A	A/G	A/G	A/G	A/G	A/A	A/A	NA	A/A	A/A	A/G	A/A	A/G	A/A	A/A	A/A	A/G	A/G	A/G	NA	A/G	A/A
ST4.03ch01pos14348161.1	1	14348161	A/A	NA	A/G	A/G	A/A	A/A	A/A	A/A	A/A	A/A	A/G	A/A	A/G	A/A	A/A	A/G	A/G	A/G	A/A	A/G	A/A	A/A	A/G	A/G	A/G	A/G	A/G	A/A	A/A	A/G	A/A	A/A	NA	A/A	NA	A/A	A/G	A/A	A/A	G/G	A/G	A/A	A/G	A/A	A/A	A/A	A/A
ST4.03ch01pos14348174.1	1	14348174	A/A	NA	A/G	A/G	A/A	A/A	A/A	A/A	A/A	A/A	A/G	A/A	A/A	A/A	A/A	A/A	A/G	A/G	A/A	A/A	A/A	A/A	A/A	A/A	A/A	A/G	A/A	A/A	A/A	A/G	A/A	A/A	NA	A/A	A/A	A/A	A/G	A/A	A/A	A/A	A/A	A/A	A/G	A/A	A/A	A/A	A/A
ST4.03ch01pos14348210.1	1	14348210	C/T	C/T	C/T	C/C	C/T	C/T	C/T	C/T	C/T	C/C	C/C	C/C	C/T	C/T	C/T	C/T	C/C	C/T	C/C	C/C	C/C	C/C	C/T	C/T	C/C	C/C	C/T	C/T	C/T	C/T	C/C	C/C	NA	C/C	C/C	C/T	NA	C/T	C/C	C/C	C/C	C/T	C/T	C/T	NA	C/T	C/C
ST4.03ch01pos14348212.1	1	14348212	C/C	NA	C/T	C/T	C/C	C/C	C/C	C/C	C/C	C/C	C/T	C/C	C/C	C/C	C/C	C/C	C/T	C/T	C/C	C/C	C/C	C/C	C/C	C/C	C/C	C/T	C/C	C/C	C/C	NA	C/C	C/C	C/C	C/C	C/C	C/C	C/C	C/C	C/C	C/C	C/C	C/C	C/T	C/C	C/C	C/C	C/C
ST4.03ch01pos14649049.1	1	14649049	A/A	A/A	A/A	A/G	A/G	A/A	A/G	A/A	A/G	A/A	A/G	A/A	A/A	A/A	A/G	A/A	A/A	A/A	A/G	A/A	A/G	A/G	A/A	A/A	A/G	A/A	A/A	A/G	A/G	A/A	A/G	A/G	A/A	G/G	G/G	A/G	A/G	A/A	A/A	A/A	A/G	A/A	A/A	A/G	A/G	A/G	A/G
ST4.03ch01pos14649115.1	1	14649115	G/T	G/T	G/T	G/T	G/T	G/T	G/G	G/T	G/G	T/T	G/T	T/T	G/T	G/T	G/G	G/T	T/T	G/T	G/T	T/T	G/T	G/T	G/T	G/T	G/T	T/T	G/G	G/G	G/T	G/T	G/T	G/T	G/T	G/G	G/G	G/T	G/T	G/T	G/G	T/T	G/T	G/T	G/T	G/G	G/T	G/G	G/T
ST4.03ch01pos14649121.1	1	14649121	T/A	T/A	T/A	T/A	T/A	T/A	T/T	T/A	T/T	A/A	T/A	A/A	T/A	T/A	T/T	T/A	A/A	T/A	T/A	A/A	T/A	T/A	T/A	T/A	T/A	A/A	T/T	T/T	T/A	T/A	T/A	T/A	T/A	T/T	T/T	T/A	T/A	T/A	T/T	A/A	T/A	T/A	T/A	T/T	T/A	T/T	T/A
ST4.03ch01pos15107915.1	1	15107915	T/T	T/T	NA	T/T	T/T	T/C	T/T	T/C	T/T	NA	T/T	NA	T/T	T/C	T/T	T/T	T/T	T/T	T/T	NA	NA	NA	T/T	T/T	NA	NA	T/T	T/T	T/T	T/T	T/C	T/T	NA	T/T	T/T	T/T	T/T	T/T	NA	T/T	T/T	T/T	T/T	T/T	T/C	T/T	T/C
ST4.03ch01pos15109385.1	1	15109385	A/A	A/A	NA	A/A	G/A	NA	A/A	G/A	A/A	NA	A/A	G/A	A/A	G/A	A/A	A/A	A/A	G/A	A/A	G/G	NA	NA	A/A	A/A	NA	NA	NA	A/A	A/A	G/A	G/A	NA	NA	NA	A/A	NA	G/A	G/G	NA	A/A	NA	G/A	G/A	A/A	G/A	A/A	G/A
ST4.03ch01pos15109400.1	1	15109400	G/G	G/G	NA	G/G	T/G	NA	G/G	T/G	G/G	NA	G/G	T/G	G/G	T/G	G/G	G/G	G/G	T/G	G/G	T/T	NA	NA	G/G	G/G	NA	NA	NA	G/G	G/G	T/G	T/G	NA	NA	NA	G/G	NA	T/G	T/T	NA	G/G	NA	T/G	T/G	G/G	T/G	G/G	T/G
ST4.03ch01pos15152591.1	1	15152591	A/A	NA	A/A	G/A	G/A	A/A	A/A	A/A	A/A	NA	G/A	NA	G/A	A/A	NA	G/A	A/A	A/A	A/A	A/A	NA	NA	G/A	G/A	G/A	NA	A/A	G/G	NA	G/A	A/A	A/A	NA	G/A	NA	G/A	G/A	G/A	A/A	G/A	G/A	G/A	A/A	G/A	NA	A/A	A/A
ST4.03ch01pos15310132.1	1	15310132	G/G	G/G	G/G	G/G	G/G	G/G	G/G	G/G	G/G	NA	G/G	G/G	G/G	G/G	G/G	G/G	G/G	G/G	G/G	NA	G/G	NA	G/G	G/G	NA	NA	NA	G/G	NA	G/G	G/G	G/G	G/A	A/A	G/A	G/G	NA	NA	G/G	G/G	NA	G/G	G/G	G/G	G/G	G/G	G/G
ST4.03ch01pos15317343.1	1	15317343	A/A	NA	NA	G/A	G/A	A/A	A/A	A/A	A/A	NA	G/A	NA	G/A	A/A	NA	G/A	A/A	A/A	A/A	A/A	NA	NA	G/A	G/A	G/A	NA	A/A	G/G	G/A	G/A	A/A	A/A	NA	G/A	NA	G/A	G/A	G/A	A/A	G/A	G/A	G/A	A/A	G/A	NA	A/A	A/A
ST4.03ch01pos18928748.1	1	18928748	T/A	T/T	T/A	NA	T/A	T/A	T/A	T/A	A/A	T/T	A/A	T/T	T/A	T/A	A/A	T/A	T/T	T/A	T/T	T/T	NA	T/T	T/A	T/A	T/T	T/T	T/A	A/A	T/A	T/A	T/A	T/T	T/A	T/T	T/A	T/A	T/T	T/A	T/A	T/T	T/T	T/A	T/A	A/A	T/A	A/A	T/A
ST4.03ch01pos18928781.1	1	18928781	C/T	C/C	C/T	NA	C/T	C/T	C/T	C/T	T/T	C/C	T/T	C/C	C/T	C/T	T/T	C/T	C/C	C/T	C/C	C/C	NA	C/C	C/T	C/T	C/C	C/C	C/T	T/T	C/T	C/T	C/T	C/C	C/T	C/C	C/T	C/T	C/T	C/T	C/T	C/C	C/C	C/T	C/T	T/T	C/T	T/T	C/T
ST4.03ch01pos19664201.1	1	19664201	T/C	NA	C/C	T/C	NA	T/C	C/C	T/C	C/C	T/C	T/C	T/C	T/C	T/C	C/C	NA	T/T	T/C	T/T	T/C	NA	NA	NA	T/C	T/T	T/T	C/C	NA	NA	T/C	T/C	T/T	T/T	T/T	T/C	T/C	NA	T/C	NA	T/C	T/T	T/C	T/C	C/C	T/C	C/C	T/C
ST4.03ch01pos19664241.1	1	19664241	G/G	G/G	G/G	G/G	G/G	G/G	G/G	G/G	G/G	G/G	G/G	G/G	G/G	G/G	G/G	G/G	G/G	G/G	G/C	G/G	NA	G/G	G/G	G/G	G/C	G/G	G/G	G/G	NA	G/C	G/G	NA	NA	G/C	G/G	G/C	G/C	G/G	G/G	G/G	G/C	G/G	G/G	G/G	G/G	G/G	G/G
ST4.03ch01pos19664242.1	1	19664242	C/C	C/C	C/C	C/C	C/C	C/C	C/C	C/C	C/C	C/C	C/C	C/C	C/C	C/C	C/C	C/C	C/C	C/C	C/A	C/C	NA	C/C	C/C	C/C	C/A	C/C	C/C	C/C	NA	C/A	C/C	NA	NA	C/A	C/C	C/A	C/A	C/C	C/C	C/C	C/A	C/C	C/C	C/C	C/C	C/C	C/C
ST4.03ch01pos19664243.1	1	19664243	T/T	T/T	T/T	T/T	T/T	T/T	T/T	T/T	T/T	T/T	T/T	T/T	T/T	T/T	T/T	T/T	T/T	T/T	T/G	T/T	NA	T/T	T/T	T/T	T/G	T/T	T/T	T/T	NA	T/G	T/T	NA	T/G	T/G	T/T	T/G	T/G	T/T	T/T	T/T	T/G	T/T	T/T	T/T	T/T	T/T	T/T
ST4.03ch01pos19664244.1	1	19664244	G/G	G/G	G/G	G/G	G/G	G/G	G/G	G/G	G/G	G/G	G/G	G/G	G/G	G/G	G/G	G/G	G/G	G/G	G/C	G/G	NA	G/G	G/G	G/G	G/C	G/G	G/G	G/G	NA	G/C	G/G	NA	NA	G/C	G/G	G/C	G/C	G/G	G/G	G/G	G/C	G/G	G/G	G/G	G/G	G/G	G/G
ST4.03ch01pos20474237.1	1	20474237	A/A	A/A	A/A	A/A	A/T	A/A	A/A	A/A	A/A	A/A	A/A	A/A	A/A	A/A	A/A	A/A	A/A	A/A	A/A	A/A	A/A	A/A	A/A	A/A	A/A	A/A	A/A	A/A	A/A	A/A	A/A	A/A	A/T	A/T	A/A	A/A	A/A	A/T	A/A	A/A	A/A	A/T	A/A	A/A	A/A	A/A	A/A
ST4.03ch01pos20474265.1	1	20474265	G/G	G/G	G/G	G/G	G/C	G/G	G/G	G/G	G/G	G/G	G/G	G/G	G/G	G/G	G/G	G/G	G/G	G/G	G/G	G/G	G/G	G/G	G/G	G/G	G/G	G/G	G/G	G/G	G/G	NA	G/G	G/G	NA	G/C	G/G	G/G	G/G	G/C	G/G	G/G	G/G	G/C	G/G	G/G	G/G	G/G	G/G
ST4.03ch01pos20474272.1	1	20474272	A/C	A/A	A/C	A/A	A/A	A/C	A/C	A/C	A/C	A/A	A/A	A/A	A/A	A/C	A/C	A/A	A/A	A/C	A/A	A/A	A/A	A/A	A/A	A/A	A/C	A/A	A/C	A/A	A/A	A/A	A/A	A/A	A/C	A/A	A/A	A/A	A/A	A/A	A/A	A/A	NA	A/A	A/C	A/A	A/A	A/C	A/A
ST4.03ch01pos20474274.1	1	20474274	C/C	C/C	C/C	C/T	C/T	C/C	C/T	C/C	C/T	C/C	C/T	C/C	C/C	C/C	C/T	C/C	C/C	C/C	C/C	C/C	C/C	C/C	C/C	C/C	C/C	C/C	C/C	NA	C/C	C/T	C/T	C/C	NA	C/T	C/T	C/C	NA	C/T	C/T	C/C	C/C	C/T	C/C	C/T	C/C	C/T	C/T
ST4.03ch01pos23656979.1	1	23656979	T/G	T/G	T/G	G/G	G/G	T/G	T/G	T/G	T/G	G/G	G/G	G/G	G/G	T/G	T/G	G/G	G/G	T/G	G/G	G/G	G/G	G/G	G/G	G/G	T/G	G/G	T/G	G/G	G/G	NA	G/G	G/G	T/G	G/G	G/G	G/G	G/G	G/G	G/G	G/G	T/G	G/G	T/G	G/G	G/G	T/G	G/G
ST4.03ch01pos23656980.1	1	23656980	T/C	T/C	T/C	C/C	T/T	T/T	T/C	T/T	T/C	T/C	C/C	T/C	T/C	T/T	T/C	NA	C/C	T/C	C/C	T/C	C/C	T/C	T/C	T/C	T/C	NA	T/C	T/C	T/C	T/C	T/C	C/C	T/C	C/C	C/C	T/C	C/C	T/T	C/C	C/C	T/C	T/T	T/C	T/C	T/C	T/C	T/C
ST4.03ch01pos23656991.1	1	23656991	A/A	A/T	A/T	A/T	A/A	A/A	A/A	A/A	A/A	A/A	A/T	A/A	A/A	A/A	A/A	A/A	A/T	A/T	A/T	A/A	A/T	NA	A/A	A/A	A/T	A/T	A/A	A/A	A/T	A/T	A/A	NA	A/A	A/T	A/A	A/T	A/T	A/A	A/A	A/A	A/T	A/A	A/T	A/A	A/A	A/A	A/A
ST4.03ch01pos23657001.1	1	23657001	T/T	T/T	T/T	T/T	T/T	T/T	T/C	T/T	T/T	T/T	T/T	T/T	T/T	T/T	T/T	T/T	T/T	T/T	T/T	T/C	T/T	T/T	T/T	T/T	T/T	T/T	T/C	T/T	T/T	T/C	T/T	T/T	T/T	T/T	T/T	T/T	NA	T/T	T/T	T/C	T/T	T/T	T/T	T/T	T/T	T/T	T/T
ST4.03ch01pos23657880.1	1	23657880	C/C	C/C	C/C	C/C	C/C	C/C	C/C	C/C	C/C	C/C	C/C	C/C	C/C	C/C	C/C	C/C	C/C	C/C	C/C	C/T	NA	C/C	C/C	C/C	C/C	C/C	NA	C/C	C/C	C/C	C/C	C/C	NA	C/C	C/C	C/C	C/C	C/C	C/C	C/T	C/C	C/C	C/C	C/C	C/C	C/C	C/C
ST4.03ch01pos23657898.1	1	23657898	G/G	G/G	G/A	G/G	G/G	G/G	G/G	G/G	G/G	G/G	G/G	G/G	G/G	G/G	G/G	G/G	G/G	G/A	G/G	G/G	NA	G/G	G/G	G/G	G/G	G/G	G/G	G/G	G/G	G/G	G/G	G/G	NA	G/G	G/G	G/G	G/G	G/G	NA	G/G	G/G	G/G	G/A	G/G	G/G	G/G	G/G
ST4.03ch01pos23657901.1	1	23657901	C/C	C/C	C/T	C/C	C/C	C/C	C/C	C/C	C/C	C/C	C/C	C/C	C/C	C/C	C/C	C/C	C/C	C/T	C/C	C/T	NA	C/C	C/C	C/C	C/C	NA	NA	C/C	C/C	NA	C/C	C/C	NA	C/C	C/C	C/C	C/C	C/C	NA	C/T	C/C	C/C	C/T	C/C	C/C	C/C	C/C
ST4.03ch01pos24032420.1	1	24032420	G/G	G/A	G/A	G/A	G/G	G/G	G/G	G/G	G/G	G/G	G/A	G/G	G/G	G/G	G/G	G/G	A/A	G/A	NA	G/G	NA	G/G	G/G	G/G	G/G	NA	G/G	G/G	G/G	G/G	G/G	NA	G/A	NA	G/G	G/G	G/G	G/G	G/G	G/G	G/G	G/G	G/A	G/G	G/G	G/G	G/G
ST4.03ch01pos24032444.1	1	24032444	A/A	A/C	A/C	A/C	A/A	A/A	A/A	A/A	A/A	A/A	A/C	A/A	A/A	A/A	A/A	A/A	C/C	A/C	NA	A/A	NA	A/A	A/A	A/A	A/A	NA	A/A	A/A	A/A	A/A	A/A	NA	A/C	NA	A/A	A/A	A/A	A/A	A/A	A/A	A/A	A/A	A/C	A/A	A/A	A/A	A/A
ST4.03ch01pos24032459.1	1	24032459	G/G	G/A	G/A	G/A	G/G	G/G	G/G	G/G	G/G	G/G	G/A	G/G	G/G	G/G	G/G	G/G	G/A	G/A	G/G	G/G	G/G	G/G	G/G	G/G	G/G	G/A	G/G	G/G	G/G	G/G	G/G	G/G	G/G	G/G	G/G	G/G	G/G	G/G	G/G	G/G	G/G	G/G	G/A	G/G	G/G	G/G	G/G
ST4.03ch01pos24032470.1	1	24032470	G/G	G/G	G/A	G/G	G/G	G/G	G/G	G/G	G/G	G/G	G/G	G/G	G/G	G/G	G/G	G/G	G/G	G/A	G/G	G/A	G/G	G/G	G/G	G/G	G/A	G/G	G/A	G/G	G/G	G/G	G/G	G/G	G/G	G/G	G/G	G/A	NA	G/G	G/G	G/A	G/A	G/G	G/A	G/G	G/G	G/G	G/G
ST4.03ch01pos24168991.1	1	24168991	G/A	NA	NA	G/A	G/A	G/G	G/A	G/G	G/A	NA	G/A	NA	G/A	G/G	G/A	NA	G/A	G/G	G/A	G/G	NA	G/A	NA	G/A	G/G	G/G	G/G	A/A	G/A	G/A	G/A	NA	G/G	G/G	G/A	G/A	G/A	G/A	G/A	G/G	G/G	G/A	G/G	A/A	G/A	G/A	G/A
ST4.03ch01pos29194216.1	1	29194216	C/C	NA	C/C	C/C	C/T	C/C	C/C	C/T	C/C	C/T	C/C	NA	C/C	NA	NA	C/C	C/C	C/C	C/C	NA	NA	C/T	C/C	C/C	C/C	NA	C/C	C/C	NA	C/C	C/T	NA	NA	C/C	C/C	C/C	C/C	C/T	C/C	C/C	C/C	C/T	C/C	C/C	C/T	C/C	C/T
ST4.03ch01pos29224499.1	1	29224499	A/A	A/A	A/A	A/A	A/A	A/A	A/A	A/A	A/A	A/A	A/A	A/A	A/A	A/A	A/A	A/A	A/A	A/A	A/A	A/A	A/A	A/A	A/A	A/A	A/A	A/A	A/A	A/A	A/A	A/A	A/A	A/A	A/A	A/A	A/A	A/A	A/A	A/A	A/A	A/A	A/A	A/A	A/A	A/A	A/A	A/A	A/A
ST4.03ch01pos29224504.1	1	29224504	G/C	G/C	C/C	C/C	C/C	C/C	C/C	C/C	C/C	G/C	C/C	G/C	G/C	C/C	C/C	G/C	G/G	C/C	G/C	C/C	G/C	G/C	G/C	G/C	C/C	C/C	C/C	C/C	G/C	G/C	C/C	G/C	G/C	C/C	C/C	G/C	G/C	C/C	C/C	G/C	C/C	C/C	C/C	C/C	G/C	C/C	C/C
ST4.03ch01pos29633426.1	1	29633426	G/G	G/G	G/G	NA	G/G	G/G	G/G	G/G	G/G	G/G	NA	G/G	G/T	G/G	G/G	G/G	G/G	G/G	G/G	G/G	G/G	G/G	G/G	G/G	NA	G/G	NA	G/G	G/G	G/G	G/G	G/G	G/G	G/G	G/G	G/G	G/G	G/G	G/G	G/G	NA	G/G	G/G	NA	G/G	G/G	G/G
ST4.03ch01pos29633434.1	1	29633434	G/G	G/G	G/G	NA	G/G	G/G	G/G	G/G	G/G	G/G	NA	G/G	G/G	G/G	G/G	G/G	G/G	G/G	A/G	G/G	A/A	NA	G/G	G/G	NA	G/G	NA	G/G	A/G	A/G	G/G	A/A	NA	A/G	G/G	A/G	A/A	G/G	G/G	G/G	NA	G/G	G/G	NA	G/G	G/G	G/G
ST4.03ch01pos29633443.1	1	29633443	C/C	C/C	C/C	NA	C/C	C/C	C/C	C/C	C/C	C/C	NA	C/C	C/T	C/C	C/C	C/C	C/C	C/C	C/C	C/C	C/C	C/C	C/C	C/C	NA	C/C	NA	C/C	C/C	C/C	C/C	C/C	C/C	C/C	C/C	C/C	C/C	C/C	C/C	C/C	NA	C/C	C/C	NA	C/C	C/C	C/C
ST4.03ch01pos29633459.1	1	29633459	G/G	G/G	G/G	NA	G/G	G/G	G/G	G/G	G/G	G/G	NA	G/G	G/A	G/G	G/G	A/A	G/G	G/G	G/G	G/G	G/G	G/G	A/A	A/A	NA	G/G	NA	G/G	G/G	G/G	G/G	G/G	G/G	G/G	G/G	G/G	G/G	G/G	G/G	A/A	NA	G/G	G/G	NA	G/G	G/G	G/G
ST4.03ch01pos29633460.1	1	29633460	C/C	C/C	C/C	NA	C/C	C/C	C/C	C/C	C/C	C/C	NA	C/C	C/C	C/C	C/C	C/C	C/C	C/C	C/C	C/C	C/C	C/C	C/C	C/C	NA	C/C	NA	C/C	C/C	C/C	C/C	C/C	C/T	C/C	C/C	C/C	C/C	C/C	C/C	C/C	NA	C/C	C/C	NA	C/C	C/T	C/C
ST4.03ch01pos29633464.1	1	29633464	T/T	T/T	T/T	NA	T/T	T/T	T/T	T/T	T/T	T/T	NA	T/T	T/A	T/T	T/T	A/A	T/T	T/T	T/T	T/T	T/T	T/T	A/A	A/A	NA	T/T	NA	T/T	T/T	T/T	T/T	T/T	T/T	T/T	T/T	T/T	T/T	T/T	T/T	A/A	NA	T/T	T/T	NA	T/T	T/T	T/T
ST4.03ch01pos29633468.1	1	29633468	C/C	C/C	C/C	NA	C/C	C/C	C/C	C/C	C/C	C/C	NA	C/C	C/T	C/C	C/C	T/T	C/C	C/C	C/C	C/C	C/C	C/C	T/T	T/T	NA	C/C	NA	C/C	C/C	C/C	C/C	C/C	C/C	C/C	C/C	C/C	C/C	C/C	C/C	T/T	NA	C/C	C/C	NA	C/C	C/C	C/C
ST4.03ch01pos29633470.1	1	29633470	C/C	C/C	C/C	NA	C/C	C/C	C/C	C/C	C/C	C/C	NA	C/C	C/C	C/C	C/C	C/C	C/C	C/C	C/T	C/C	C/T	C/C	C/C	C/C	NA	C/C	NA	C/C	C/T	C/T	C/C	C/T	C/C	C/T	C/C	C/T	C/T	C/C	C/C	C/C	NA	C/C	C/C	NA	C/C	C/C	C/C
ST4.03ch01pos30132061.1	1	30132061	T/A	T/T	T/T	T/T	T/T	T/T	T/T	T/T	T/T	T/T	T/T	T/T	T/T	T/T	T/T	T/T	T/T	T/T	T/T	T/T	T/T	T/T	T/T	T/T	T/T	T/T	T/T	T/T	T/T	T/T	T/T	T/T	T/T	T/T	NA	T/A	T/T	T/T	T/T	T/T	T/T	T/T	T/T	T/A	T/T	T/T	T/A
ST4.03ch01pos30132063.1	1	30132063	C/A	C/C	C/C	C/C	C/C	C/C	C/C	C/C	C/C	C/C	C/C	C/C	C/C	C/C	C/C	C/C	C/C	C/C	C/C	C/C	C/C	C/C	C/C	C/C	C/C	C/C	C/C	C/C	C/C	C/C	C/C	C/C	C/C	C/C	C/A	C/A	C/C	C/C	C/C	C/C	C/C	C/C	C/C	C/A	C/C	C/C	C/A
ST4.03ch01pos30132064.1	1	30132064	A/T	A/A	A/A	A/A	A/A	A/A	A/A	A/A	A/A	A/A	A/A	A/A	A/A	A/A	A/A	A/A	A/A	A/A	A/A	A/A	A/A	A/A	A/A	A/A	A/A	A/A	A/A	A/A	A/A	A/A	A/A	A/A	A/A	A/A	A/T	A/T	A/A	A/A	A/A	A/A	A/A	A/A	A/A	A/T	A/A	A/A	A/T
ST4.03ch01pos30132071.1	1	30132071	G/A	G/G	G/G	G/G	G/G	G/G	G/G	G/G	G/G	G/G	G/G	G/G	G/G	G/G	G/G	G/G	G/G	G/G	G/G	G/G	G/G	G/G	G/G	G/G	G/G	G/G	G/G	G/G	G/G	G/G	G/G	G/G	G/G	G/G	G/A	G/A	G/G	G/G	G/G	G/G	G/G	G/G	G/G	G/A	G/G	G/G	G/A
ST4.03ch01pos30132075.1	1	30132075	C/A	C/C	C/C	C/C	C/C	C/C	C/C	C/C	C/C	C/C	C/C	C/C	C/C	C/C	C/C	C/C	C/C	C/C	C/C	C/C	C/C	C/C	C/C	C/C	C/C	C/C	C/C	C/C	C/C	C/C	C/C	C/C	C/C	C/C	C/A	C/A	NA	C/C	C/C	C/C	C/C	C/C	C/C	C/A	C/C	C/C	C/A
ST4.03ch01pos30132090.1	1	30132090	G/A	G/G	G/G	G/G	G/G	G/G	G/G	G/G	G/G	G/G	G/G	G/G	G/G	G/G	G/G	G/G	G/G	G/G	G/G	G/G	G/G	G/G	G/G	G/G	G/G	G/G	G/G	G/G	G/G	G/G	G/G	G/G	G/G	G/G	G/A	G/A	NA	G/G	G/G	G/G	G/G	G/G	G/G	G/A	G/G	G/G	G/A
ST4.03ch01pos30132134.1	1	30132134	C/G	C/C	C/C	C/C	C/C	C/C	C/C	C/C	C/C	C/C	C/C	C/C	C/C	C/C	C/C	C/C	C/C	C/C	C/C	C/C	C/C	C/C	C/C	C/C	C/C	C/C	C/C	C/C	C/C	C/C	C/C	C/C	C/C	C/C	C/G	C/G	NA	C/C	C/C	C/C	C/C	C/C	C/C	C/G	C/C	C/C	C/G
ST4.03ch01pos32180756.1	1	32180756	A/G	A/G	A/G	A/A	A/G	A/A	A/G	A/A	A/A	A/A	A/A	A/A	A/A	A/A	A/G	A/A	A/A	A/G	A/A	A/A	A/A	A/A	A/A	A/A	A/A	A/A	A/A	A/A	A/A	A/G	A/A	A/A	A/G	A/A	A/A	NA	A/A	A/A	G/G	A/A	A/A	A/A	A/G	A/G	A/A	A/G	A/A
ST4.03ch01pos32180807.1	1	32180807	G/G	G/G	G/G	G/G	G/A	G/A	G/G	G/A	G/G	G/A	G/G	G/A	G/G	G/A	G/G	G/G	G/G	G/G	G/G	G/A	G/G	G/A	G/G	G/G	G/G	G/A	G/G	G/G	G/G	G/G	G/A	G/G	G/G	G/G	G/G	G/G	G/G	G/A	G/G	G/G	G/G	G/A	G/G	G/G	G/A	G/G	G/A
ST4.03ch01pos32875087.1	1	32875087	C/C	C/C	C/C	C/C	C/C	G/G	C/C	G/G	C/G	C/C	C/C	C/C	C/C	G/G	C/C	C/C	NA	C/C	G/G	C/C	G/G	C/G	C/C	C/C	C/G	C/C	C/G	C/C	C/G	C/G	C/C	G/G	C/C	C/G	C/C	C/G	C/G	NA	C/C	C/C	C/G	NA	C/C	C/C	C/C	C/C	C/C
ST4.03ch01pos32875093.1	1	32875093	C/C	C/C	C/C	C/C	C/C	A/A	C/C	A/A	C/A	C/C	C/C	C/C	C/C	A/A	C/C	C/C	NA	C/C	A/A	C/C	A/A	C/A	C/C	C/C	C/A	C/C	C/A	C/C	C/A	C/A	C/C	A/A	C/C	C/A	C/C	C/A	C/A	NA	C/C	C/C	C/A	NA	C/C	C/C	C/C	C/C	C/C
ST4.03ch01pos32875158.1	1	32875158	A/A	A/A	A/A	A/A	A/A	G/G	A/A	G/G	A/G	A/A	A/A	A/A	A/A	G/G	A/A	A/A	NA	A/A	G/G	A/A	G/G	A/G	A/A	A/A	A/G	A/A	A/G	A/A	A/G	A/G	A/A	G/G	A/A	A/G	A/A	A/G	A/G	NA	A/A	A/A	A/G	A/A	A/A	A/A	A/A	A/A	A/A
ST4.03ch01pos33299566.1	1	33299566	C/C	C/C	C/C	C/G	C/G	C/C	C/G	C/C	C/G	C/C	C/G	C/C	C/C	C/C	C/G	C/C	C/C	C/C	C/C	C/C	C/C	C/C	C/C	C/C	C/C	C/C	C/C	C/G	C/G	C/C	C/G	C/C	C/C	C/C	C/G	C/G	C/C	C/C	C/C	C/C	C/C	C/C	C/C	C/C	C/C	C/G	C/G
ST4.03ch01pos34911016.1	1	34911016	C/C	C/C	C/C	C/C	C/T	C/T	C/C	C/T	C/C	C/T	C/C	C/T	C/C	C/T	C/C	C/C	C/C	C/C	C/C	C/T	C/C	C/T	C/C	C/C	C/C	C/T	C/C	C/C	C/C	C/C	C/T	C/C	C/C	C/C	C/C	C/C	C/C	C/T	C/C	C/C	C/C	C/T	C/C	C/C	C/T	C/C	C/T
ST4.03ch01pos35457034.1	1	35457034	T/C	T/C	T/C	T/C	T/C	T/T	T/C	T/T	T/T	T/T	T/C	T/T	T/C	T/T	T/T	T/C	C/C	T/C	T/C	T/T	T/C	NA	T/C	T/C	T/T	T/C	T/T	T/C	T/C	T/C	T/T	T/C	T/C	T/T	T/T	T/C	T/C	T/C	T/T	T/T	T/T	T/C	T/C	T/C	T/T	T/T	T/T
ST4.03ch01pos35457035.1	1	35457035	A/A	A/A	A/A	A/G	A/G	G/G	A/G	G/G	G/G	G/G	A/G	G/G	A/G	G/G	A/G	A/G	A/A	A/A	A/G	A/G	A/G	NA	A/G	A/G	A/G	A/G	A/G	A/G	A/G	A/G	G/G	A/G	A/G	G/G	G/G	A/G	A/G	A/G	A/G	A/G	A/G	A/G	A/A	A/A	G/G	A/G	G/G
ST4.03ch01pos35856301.1	1	35856301	T/T	T/T	T/T	T/T	T/C	T/C	T/T	T/C	T/T	T/C	T/T	T/C	T/T	T/C	T/T	T/T	T/T	T/T	T/T	T/C	T/T	T/C	T/T	T/T	T/T	T/C	T/T	T/T	T/T	T/T	T/C	T/T	T/T	T/T	T/T	T/T	T/T	T/C	T/T	T/T	T/T	T/C	T/T	T/T	T/C	T/T	T/C
ST4.03ch01pos37612451.1	1	37612451	A/A	NA	A/A	A/A	A/A	A/A	T/A	A/A	A/A	A/A	A/A	A/A	A/A	A/A	A/A	A/A	A/A	A/A	A/A	NA	NA	A/A	A/A	A/A	T/A	NA	NA	A/A	A/A	A/A	A/A	A/A	A/A	A/A	A/A	A/A	A/A	A/A	A/A	T/A	T/A	A/A	A/A	A/A	A/A	A/A	A/A
ST4.03ch01pos37612490.1	1	37612490	A/A	NA	A/A	A/A	A/A	A/A	T/A	A/A	A/A	A/A	A/A	A/A	A/A	A/A	A/A	A/A	A/A	A/A	A/A	NA	NA	A/A	A/A	A/A	T/A	NA	NA	A/A	A/A	A/A	A/A	A/A	A/A	A/A	A/A	A/A	A/A	A/A	A/A	T/A	T/A	A/A	A/A	A/A	A/A	A/A	A/A
ST4.03ch01pos37612493.1	1	37612493	A/G	NA	A/G	G/G	A/G	A/G	A/G	A/G	G/G	A/A	G/G	A/A	A/G	A/G	A/G	A/G	G/G	A/G	G/G	A/A	NA	NA	A/G	A/G	A/G	A/G	NA	G/G	G/G	A/G	A/G	G/G	A/G	G/G	G/G	G/G	NA	A/G	A/A	A/A	A/G	A/G	A/G	A/G	A/A	A/G	A/G
ST4.03ch01pos38821193.1	1	38821193	C/C	NA	C/C	C/C	C/C	C/C	C/C	C/C	C/C	C/C	C/C	C/C	C/C	C/C	C/C	C/C	C/C	C/C	C/C	T/C	C/C	C/C	C/C	C/C	T/C	NA	T/C	C/C	C/C	C/C	C/C	C/C	NA	C/C	C/C	NA	C/C	C/C	C/C	T/C	T/C	C/C	C/C	C/C	C/C	C/C	C/C
ST4.03ch01pos38824951.1	1	38824951	T/T	C/T	T/T	T/T	T/T	T/T	C/T	T/T	T/T	T/T	T/T	T/T	T/T	T/T	T/T	T/T	T/T	T/T	T/T	C/T	T/T	T/T	T/T	T/T	C/T	C/T	C/C	T/T	T/T	NA	T/T	T/T	T/T	T/T	T/T	C/T	T/T	T/T	T/T	C/T	NA	T/T	T/T	T/T	T/T	T/T	T/T
ST4.03ch01pos40215237.1	1	40215237	G/G	G/C	G/C	G/C	G/G	G/G	G/G	G/G	G/G	NA	G/C	NA	G/G	G/G	G/G	G/G	G/C	G/C	G/G	G/G	G/G	G/G	G/G	G/G	G/G	G/C	G/G	G/G	G/G	G/G	G/G	G/G	G/C	G/G	G/G	G/G	G/G	G/G	G/G	G/G	G/G	G/G	G/C	G/G	G/G	G/G	G/G
ST4.03ch01pos40215239.1	1	40215239	G/A	G/A	G/A	G/A	G/A	G/A	A/A	G/A	A/A	G/G	G/A	G/G	G/A	G/A	A/A	G/A	G/G	G/A	G/G	G/A	G/G	G/G	G/A	G/A	G/G	G/G	A/A	A/A	G/A	G/A	G/A	G/G	G/A	G/G	G/A	G/A	G/A	G/A	G/A	G/A	G/G	G/A	G/A	A/A	G/A	A/A	G/A
ST4.03ch01pos40215246.1	1	40215246	G/G	G/G	G/G	G/G	G/C	G/C	G/G	G/C	G/G	C/C	G/G	C/C	G/G	G/C	G/G	G/G	G/G	G/G	G/G	G/C	G/G	G/C	G/G	G/G	G/G	G/C	G/G	G/G	G/G	G/G	G/C	G/G	G/G	G/G	G/G	G/G	G/G	G/C	G/G	G/G	G/G	G/C	G/G	G/G	G/C	G/G	G/C
ST4.03ch01pos40215247.1	1	40215247	T/C	T/C	T/C	T/C	T/C	T/C	C/C	T/C	C/C	T/T	T/C	T/T	T/C	T/C	C/C	T/C	T/T	T/C	T/T	T/C	T/T	T/T	T/C	T/C	T/T	T/T	C/C	C/C	T/C	T/C	T/C	T/T	T/C	T/T	T/C	T/C	T/C	T/C	T/C	T/C	T/T	T/C	T/C	C/C	T/C	C/C	T/C
ST4.03ch01pos40215257.1	1	40215257	G/T	G/T	G/T	G/T	G/T	G/T	T/T	G/T	T/T	G/G	G/T	G/G	G/T	G/T	T/T	G/T	G/G	G/T	G/G	G/T	G/G	G/G	G/T	G/T	G/G	G/G	T/T	T/T	G/T	G/T	G/T	G/G	G/T	G/G	G/T	G/T	G/T	G/T	G/T	G/T	G/G	G/T	G/T	T/T	G/T	T/T	G/T
ST4.03ch01pos40215262.1	1	40215262	G/G	G/G	G/G	G/G	T/T	T/T	NA	T/T	NA	T/T	G/G	T/T	G/G	T/T	NA	G/G	G/G	G/G	G/G	T/T	G/G	T/G	G/G	G/G	G/G	T/G	NA	G/G	G/G	G/G	T/T	G/G	G/G	G/G	G/G	G/G	G/G	T/T	T/T	G/G	G/G	T/T	G/G	NA	T/T	NA	T/T
ST4.03ch01pos40215265.1	1	40215265	T/A	T/A	T/A	T/A	T/T	T/T	T/T	T/T	T/T	T/T	T/A	T/T	T/A	T/T	T/T	T/A	A/A	T/A	T/A	T/T	T/A	T/A	T/A	T/A	T/A	T/A	T/T	T/T	T/A	T/A	T/T	T/A	T/A	T/A	T/A	T/A	T/A	T/T	T/T	T/A	T/A	T/T	T/A	T/T	T/T	T/T	T/T
ST4.03ch01pos40215267.1	1	40215267	C/C	C/C	C/T	C/C	C/C	C/C	C/C	C/C	C/C	C/C	C/C	C/C	C/C	C/C	C/C	C/C	C/C	C/T	C/C	C/T	C/C	C/C	C/C	C/C	C/C	C/C	C/T	C/C	C/C	C/T	C/C	C/C	C/C	C/C	C/C	C/C	C/T	C/C	C/C	C/T	C/C	C/C	C/T	C/C	C/C	C/C	C/C
ST4.03ch01pos40215278.1	1	40215278	T/C	T/C	T/C	T/C	T/C	T/C	C/C	T/C	C/C	T/T	T/C	T/T	T/C	T/C	C/C	T/C	T/T	T/C	T/T	T/C	T/T	T/T	T/C	T/C	T/T	T/T	C/C	C/C	T/C	T/C	T/C	T/T	T/C	T/T	T/C	T/C	T/C	T/C	T/C	T/C	T/T	T/C	T/C	C/C	T/C	C/C	T/C
ST4.03ch01pos40215288.1	1	40215288	A/G	A/G	A/G	A/G	A/G	A/G	G/G	A/G	G/G	A/A	A/G	A/A	A/G	A/G	G/G	A/G	A/A	A/G	A/A	A/G	A/A	A/A	A/G	A/G	A/A	A/A	G/G	G/G	A/G	A/G	A/G	A/A	A/G	A/A	A/G	A/G	A/G	A/G	A/G	A/G	A/A	A/G	A/G	G/G	A/G	G/G	A/G
ST4.03ch01pos41189253.1	1	41189253	C/C	C/C	C/T	C/C	C/C	C/C	C/C	C/C	C/C	C/C	C/C	C/C	C/C	C/C	C/C	C/C	C/C	C/T	NA	T/T	NA	C/C	C/C	C/C	T/T	C/C	C/T	C/C	C/C	C/T	C/C	NA	C/C	NA	C/C	C/T	C/T	C/C	C/C	T/T	T/T	C/C	C/T	C/C	C/C	C/C	C/C
ST4.03ch01pos41189264.1	1	41189264	C/C	C/T	C/T	C/T	C/C	C/C	C/C	C/C	C/C	C/C	C/T	C/C	C/C	C/C	C/C	C/C	T/T	C/T	NA	C/C	NA	C/C	C/C	C/C	C/C	T/T	C/C	C/C	C/C	C/C	C/C	NA	C/T	NA	C/C	C/C	C/C	C/C	C/C	C/C	C/C	C/C	C/T	C/C	C/C	C/C	C/C
ST4.03ch01pos41189272.1	1	41189272	G/G	G/G	G/G	G/G	G/G	G/G	G/G	G/G	G/G	A/A	G/G	A/A	G/G	G/G	G/G	G/G	G/G	G/G	NA	G/G	NA	A/A	G/G	G/G	G/G	G/G	G/G	G/G	G/G	G/G	G/G	NA	G/G	NA	G/G	G/G	G/G	G/G	G/G	G/G	G/G	G/G	G/G	G/G	G/A	G/G	G/G
ST4.03ch01pos41189279.1	1	41189279	T/T	T/G	T/G	T/G	T/T	T/T	T/T	T/T	T/T	T/T	T/G	T/T	T/T	T/T	T/T	T/T	G/G	T/G	NA	T/T	NA	T/T	T/T	T/T	T/T	G/G	T/T	T/T	T/T	T/T	T/T	NA	T/G	NA	T/T	T/T	T/T	T/T	T/T	T/T	T/T	T/T	T/G	T/T	T/T	T/T	T/T
ST4.03ch01pos41189303.1	1	41189303	C/C	C/T	C/T	C/T	C/C	C/C	C/C	C/C	C/C	C/C	C/T	C/C	C/C	C/C	C/C	C/C	T/T	C/T	NA	C/C	NA	C/C	C/C	C/C	C/C	T/T	C/C	C/C	C/C	C/C	C/C	NA	C/T	NA	C/C	C/C	C/C	C/C	C/C	C/C	C/C	C/C	C/T	C/C	C/C	C/C	C/C
ST4.03ch01pos42061010.1	1	42061010	G/G	G/G	G/G	G/G	G/G	G/G	G/G	G/G	G/G	G/G	G/G	G/G	G/G	G/G	G/G	G/G	G/G	G/G	G/G	G/G	G/G	G/G	G/G	G/G	G/G	G/G	G/G	G/G	G/G	G/G	G/G	G/G	G/G	G/G	G/G	G/G	G/G	G/G	G/G	G/G	G/G	G/G	G/G	G/G	G/G	G/G	G/G
ST4.03ch01pos42715085.1	1	42715085	C/C	C/C	C/C	C/C	C/C	C/C	C/C	C/C	C/C	C/C	C/C	C/C	C/T	C/C	C/C	C/T	C/C	C/C	C/C	C/C	C/C	C/C	C/T	C/T	C/C	C/C	C/C	C/C	C/C	C/C	C/C	C/C	C/C	NA	C/C	C/C	C/C	C/C	C/C	T/T	C/C	C/C	C/C	C/C	C/C	C/C	C/C
ST4.03ch01pos42715099.1	1	42715099	C/C	C/C	C/T	C/C	C/T	C/T	C/C	C/T	C/C	C/T	C/C	C/T	C/C	C/T	C/C	C/C	C/C	C/T	C/C	T/T	C/C	C/T	C/C	C/C	C/C	T/T	C/C	C/C	C/C	C/T	C/T	C/C	C/T	NA	C/C	C/C	NA	C/T	C/T	C/C	C/C	C/T	C/T	C/C	C/T	C/C	C/T
ST4.03ch01pos44190499.1	1	44190499	A/G	A/A	A/A	A/G	NA	A/G	A/G	A/G	G/G	A/A	A/G	A/A	A/A	A/G	A/G	A/A	A/G	A/A	G/G	A/A	G/G	A/G	A/A	A/A	G/G	A/A	A/G	A/G	A/G	A/G	A/G	G/G	A/A	A/G	A/G	A/G	A/G	A/A	A/A	A/A	G/G	A/A	A/A	A/A	NA	A/G	A/G
ST4.03ch01pos44190510.1	1	44190510	C/G	C/C	C/C	C/G	C/G	C/G	C/G	C/G	G/G	C/C	C/G	C/C	C/C	C/G	C/G	C/C	C/G	C/C	G/G	C/C	G/G	C/G	C/C	C/C	G/G	C/C	C/G	C/G	C/G	C/G	C/G	G/G	C/C	C/G	C/G	C/G	C/G	C/C	C/C	C/C	G/G	C/C	C/C	C/C	NA	C/G	C/G
ST4.03ch01pos44190516.1	1	44190516	T/C	T/T	T/T	T/C	T/C	T/C	T/C	T/C	C/C	T/T	T/C	T/T	T/T	T/C	T/C	T/T	T/C	T/T	C/C	T/T	C/C	T/C	T/T	T/T	C/C	T/T	T/C	T/C	T/C	T/C	T/C	C/C	T/T	T/C	T/C	T/C	T/C	T/T	T/T	T/T	C/C	T/T	T/T	T/T	NA	T/C	T/C
ST4.03ch01pos44206195.1	1	44206195	C/G	NA	C/C	C/G	NA	C/C	C/G	C/C	C/G	C/C	C/G	C/C	C/C	C/C	C/G	C/C	C/G	C/C	C/G	C/C	NA	C/C	C/C	C/C	C/G	C/C	C/C	C/G	C/G	C/G	C/G	C/G	C/G	C/C	C/G	C/G	C/G	C/C	C/C	C/C	C/G	C/C	C/C	C/C	C/C	C/G	C/G
ST4.03ch01pos44403656.1	1	44403656	A/A	A/A	A/A	A/A	A/G	A/G	A/A	A/G	A/A	A/A	A/A	A/A	A/A	A/G	A/A	A/A	A/A	A/A	A/A	A/A	A/A	A/A	A/A	A/A	A/A	A/A	A/A	A/A	A/A	A/A	A/G	A/A	NA	A/A	A/A	A/A	A/A	A/A	A/G	A/A	A/A	A/A	A/A	A/A	A/A	A/A	A/G
ST4.03ch01pos46320949.1	1	46320949	T/T	C/T	T/T	T/T	T/T	T/T	C/T	T/T	T/T	T/T	T/T	T/T	T/T	T/T	T/T	T/T	T/T	T/T	T/T	C/T	T/T	T/T	T/T	T/T	C/T	C/T	NA	T/T	T/T	C/T	T/T	T/T	NA	T/T	T/T	NA	T/T	T/T	T/T	C/T	C/T	T/T	T/T	T/T	T/T	T/T	T/T
ST4.03ch01pos50154528.1	1	50154528	C/C	NA	NA	C/C	C/C	C/C	C/C	C/C	NA	C/C	C/C	C/C	C/C	C/C	C/C	C/C	C/A	C/A	C/C	NA	NA	NA	C/C	C/C	C/C	NA	C/C	C/C	C/C	C/C	C/C	C/C	C/C	C/C	C/A	C/C	C/C	C/C	C/C	C/C	C/C	C/C	C/A	C/C	C/C	C/C	C/C
ST4.03ch01pos50154572.1	1	50154572	A/A	NA	NA	A/A	A/A	A/A	A/A	A/A	NA	A/A	A/A	A/A	A/A	A/A	A/A	A/A	A/T	A/T	A/A	NA	NA	NA	A/A	A/A	A/A	NA	A/A	A/A	A/A	A/A	A/A	A/A	A/A	A/A	A/T	A/A	A/A	A/A	A/A	A/A	A/A	A/A	A/T	A/A	A/A	A/A	A/A
ST4.03ch01pos50154581.1	1	50154581	A/A	NA	A/A	A/A	A/A	A/A	A/A	A/A	NA	A/A	A/A	A/A	A/G	A/A	A/A	NA	A/A	A/A	A/A	A/G	NA	NA	A/G	A/G	A/G	A/A	A/G	A/A	A/A	A/A	A/A	A/A	A/A	A/A	A/A	A/A	A/A	A/A	NA	A/G	A/G	A/A	A/A	A/A	A/A	A/A	A/A
ST4.03ch01pos50154585.1	1	50154585	NA	NA	C/T	C/T	C/T	C/T	C/T	C/T	NA	C/T	C/T	C/T	C/T	C/T	C/T	NA	C/T	C/T	C/T	C/T	NA	NA	C/T	C/T	C/T	C/T	C/T	C/T	C/T	C/T	C/T	NA	NA	NA	C/T	C/T	C/T	C/T	C/T	C/T	C/T	NA	C/T	C/C	C/T	C/T	C/T
ST4.03ch01pos50780251.1	1	50780251	G/A	G/A	G/A	A/A	G/A	G/A	G/A	G/A	G/A	G/A	A/A	G/A	G/A	G/A	G/A	G/A	A/A	G/A	A/A	G/A	A/A	G/A	G/A	G/A	A/A	A/A	G/A	G/A	G/A	G/A	A/A	A/A	A/A	G/A	G/A	G/A	G/A	G/A	A/A	A/A	A/A	G/A	G/A	G/A	G/A	G/A	A/A
ST4.03ch01pos50780315.1	1	50780315	C/C	C/T	C/C	C/C	C/C	C/C	C/C	C/C	C/C	C/C	C/C	C/C	C/T	C/C	C/C	C/T	C/C	C/C	C/C	C/C	C/C	C/C	C/T	C/T	C/C	C/T	C/C	C/C	C/C	C/T	C/C	C/C	C/T	C/C	C/C	C/C	C/C	C/C	C/C	C/T	C/C	C/C	C/C	C/C	C/C	C/C	C/C
ST4.03ch01pos50785397.1	1	50785397	A/G	A/G	A/G	G/G	A/G	A/G	A/G	A/G	A/G	A/G	G/G	A/G	A/G	A/G	A/G	A/G	G/G	A/G	G/G	A/G	G/G	A/G	A/G	A/G	G/G	G/G	A/G	A/G	A/G	NA	G/G	G/G	G/G	A/G	A/G	A/G	G/G	A/G	G/G	G/G	G/G	A/G	A/G	A/G	A/G	A/G	G/G
ST4.03ch01pos50785405.1	1	50785405	G/G	G/A	G/G	G/G	G/G	G/G	G/G	G/G	G/G	G/G	G/G	G/G	G/A	G/G	G/G	G/A	G/G	G/G	G/G	G/G	G/G	G/G	G/A	G/A	G/G	G/A	G/G	G/G	G/G	NA	G/G	G/G	G/G	G/G	G/G	G/G	G/G	G/G	G/G	G/A	G/G	G/G	G/G	G/G	G/G	G/G	G/G
ST4.03ch01pos50785448.1	1	50785448	A/G	A/G	A/G	G/G	A/G	A/G	A/G	A/G	A/G	A/G	G/G	A/G	A/G	A/G	A/G	A/G	G/G	A/G	G/G	A/G	G/G	A/G	A/G	A/G	G/G	G/G	A/G	A/G	A/G	NA	G/G	G/G	G/G	A/G	A/G	A/G	G/G	A/G	G/G	G/G	G/G	A/G	A/G	A/G	A/G	A/G	G/G
ST4.03ch01pos50786612.1	1	50786612	C/C	C/C	C/C	C/C	C/C	C/C	C/C	C/C	C/C	C/C	C/C	C/C	C/C	C/C	C/C	C/C	C/C	C/C	C/C	C/C	C/C	C/C	C/C	C/C	C/C	C/C	C/C	C/C	C/C	C/C	C/C	C/C	C/C	C/C	C/C	C/C	C/C	C/C	C/C	C/C	C/C	C/C	C/C	C/C	C/C	C/C	C/C
ST4.03ch01pos52865545.1	1	52865545	G/G	NA	G/G	G/G	G/A	G/A	NA	G/A	G/G	G/G	G/G	G/A	G/G	G/A	G/G	G/G	G/G	G/G	G/G	A/A	G/G	G/G	G/G	G/G	G/G	G/A	G/A	G/G	G/A	G/G	NA	G/G	G/G	NA	G/G	NA	G/G	A/A	G/G	G/A	NA	A/A	G/G	NA	G/A	G/G	G/A
ST4.03ch01pos54438814.1	1	54438814	C/C	C/C	C/C	C/C	C/C	C/C	NA	C/C	C/C	C/C	C/C	C/C	C/C	C/C	C/C	C/C	C/C	C/C	C/C	C/T	NA	C/C	C/C	C/C	C/C	C/C	NA	C/C	C/C	C/C	C/C	C/C	NA	C/C	C/C	C/C	C/C	C/C	C/C	NA	C/C	C/C	C/C	C/C	C/C	C/C	C/C
ST4.03ch01pos54438867.1	1	54438867	C/C	C/C	C/C	C/C	C/C	C/C	NA	C/C	C/C	C/C	C/C	C/C	C/C	C/C	C/C	C/C	C/C	C/C	C/C	C/T	NA	C/C	C/C	C/C	C/C	C/C	NA	C/C	C/C	C/C	C/C	C/C	NA	C/C	C/C	C/C	C/C	C/C	C/C	NA	C/C	C/C	C/C	C/C	C/C	C/C	C/C
ST4.03ch01pos54438963.1	1	54438963	C/C	NA	C/C	C/C	C/C	C/C	C/G	C/C	C/C	C/C	C/C	C/C	C/C	C/C	C/C	C/C	C/C	C/C	C/C	C/G	C/C	C/C	C/C	C/C	C/C	C/C	C/G	C/C	C/C	C/C	C/C	C/C	C/C	C/C	C/C	C/C	C/C	C/C	C/C	C/G	C/C	C/C	C/C	C/C	C/C	C/C	C/C
ST4.03ch01pos54439913.1	1	54439913	G/A	G/A	G/G	G/A	G/A	G/G	G/A	G/G	G/A	G/A	G/A	G/A	G/A	G/G	G/A	G/A	G/A	G/G	G/A	G/G	G/A	G/A	G/A	G/A	G/G	G/G	G/G	A/A	G/A	G/A	G/A	G/A	G/A	G/G	G/A	G/A	G/A	G/A	A/A	G/G	G/G	G/A	G/G	A/A	G/A	G/A	G/A
ST4.03ch01pos54480396.1	1	54480396	G/G	G/A	G/A	G/A	G/A	G/A	G/G	G/A	G/G	G/A	G/A	G/A	G/A	G/A	NA	G/A	G/A	G/A	G/A	A/A	G/A	G/A	G/A	G/A	G/A	A/A	G/A	G/G	G/A	G/A	G/A	G/A	NA	A/A	A/A	G/A	G/A	G/A	G/G	A/A	G/A	G/A	G/A	G/G	G/A	G/G	G/A
ST4.03ch01pos54579436.1	1	54579436	C/C	C/C	C/C	C/C	C/C	C/C	NA	C/C	C/C	C/C	C/C	C/C	C/C	C/C	C/C	C/C	C/C	C/C	C/C	C/T	C/C	C/C	C/C	C/C	C/C	C/C	NA	C/C	C/C	C/C	C/C	C/C	C/C	C/C	C/C	C/C	C/C	C/C	C/C	C/T	C/C	C/C	C/C	C/C	C/C	C/C	C/C
ST4.03ch01pos54579445.1	1	54579445	A/A	A/A	A/A	A/A	A/A	A/A	NA	A/A	A/A	A/A	A/A	A/A	A/A	A/A	A/A	A/A	A/A	A/A	A/A	A/G	A/A	A/A	A/A	A/A	A/A	A/A	NA	A/A	A/A	NA	A/A	A/A	A/A	A/A	A/A	A/A	NA	A/A	A/A	A/G	A/A	A/A	A/A	A/A	A/A	A/A	A/A
ST4.03ch01pos55163786.1	1	55163786	G/G	G/G	G/G	G/G	G/G	G/G	NA	G/G	G/G	G/G	G/G	G/G	G/G	G/G	G/G	G/G	G/G	G/G	G/G	G/C	G/G	G/G	G/G	G/G	G/G	G/G	G/C	G/G	G/G	G/G	G/G	G/G	G/G	G/G	G/G	G/G	G/G	G/G	G/G	G/C	G/G	G/G	G/G	G/G	G/G	G/G	G/G
ST4.03ch01pos55163820.1	1	55163820	A/A	A/A	A/A	A/A	A/A	A/A	NA	A/A	A/A	A/A	A/A	A/A	A/A	A/A	A/A	A/A	A/A	A/A	A/A	A/G	A/A	A/A	A/A	A/A	A/A	A/A	A/G	A/A	A/A	A/G	A/A	A/A	A/A	A/A	A/A	A/A	A/G	A/A	A/A	A/G	A/A	A/A	A/A	A/A	A/A	A/A	A/A
ST4.03ch01pos55427971.1	1	55427971	C/C	NA	C/C	C/C	C/C	C/C	NA	C/C	C/C	C/C	NA	C/C	C/C	C/C	NA	C/C	C/C	C/C	C/C	C/T	NA	NA	C/C	C/C	C/C	C/C	C/T	C/C	C/C	C/C	C/C	C/C	NA	C/C	C/C	C/C	C/C	C/C	C/C	NA	C/C	C/C	C/C	C/C	C/C	C/C	C/C
ST4.03ch01pos57252849.1	1	57252849	T/G	T/G	T/G	T/G	T/G	G/G	T/G	G/G	T/G	T/G	T/G	T/G	T/T	G/G	T/G	T/T	T/G	T/G	T/G	T/T	T/G	T/G	T/T	T/T	G/G	G/G	T/G	T/T	T/G	T/G	T/G	T/G	T/G	G/G	T/G	T/G	T/G	G/G	T/G	T/T	G/G	G/G	T/G	T/G	T/G	T/G	T/G
ST4.03ch01pos57920027.1	1	57920027	G/G	G/G	G/G	G/G	G/G	G/G	G/A	G/G	NA	G/A	G/G	G/A	G/A	G/G	G/G	G/A	G/G	G/G	NA	A/A	NA	G/A	G/A	G/A	G/A	G/G	A/A	A/A	G/A	G/A	G/G	NA	G/G	NA	G/G	G/A	G/A	G/G	G/A	G/A	G/A	G/G	G/G	G/G	G/A	G/G	G/G
ST4.03ch01pos57920029.1	1	57920029	G/G	G/G	G/G	G/G	G/G	G/G	G/A	G/G	NA	G/A	G/G	G/A	G/A	G/G	G/G	G/A	G/G	G/G	NA	A/A	NA	G/A	G/A	G/A	G/A	G/G	A/A	A/A	G/A	G/A	G/G	NA	G/G	NA	G/G	G/A	G/A	G/G	G/A	G/A	G/A	G/G	G/G	G/G	G/A	G/G	G/G
ST4.03ch01pos57943730.1	1	57943730	T/C	NA	T/T	NA	T/C	T/C	NA	T/C	C/C	T/T	T/C	T/T	T/T	T/C	NA	NA	T/C	T/T	C/C	T/T	NA	T/C	T/T	T/T	NA	T/T	T/T	T/C	NA	T/C	T/C	NA	NA	T/C	T/C	T/C	T/C	T/T	T/T	T/T	T/C	T/T	T/T	T/T	T/C	T/C	T/C
ST4.03ch01pos57943744.1	1	57943744	A/T	NA	A/A	NA	A/T	A/T	NA	A/T	T/T	A/A	A/T	A/A	A/A	A/T	NA	NA	A/T	A/A	T/T	A/A	NA	A/T	A/A	A/A	NA	A/A	A/A	A/T	NA	A/T	A/T	NA	NA	A/T	A/T	A/T	A/T	A/A	A/A	A/A	A/T	A/A	A/A	A/A	A/T	A/T	A/T
ST4.03ch01pos57945334.1	1	57945334	C/T	C/C	C/C	C/T	C/T	C/T	C/T	C/T	T/T	C/T	C/T	C/T	C/T	C/T	NA	C/T	C/T	C/C	T/T	T/T	NA	C/T	C/T	C/T	C/T	C/C	T/T	T/T	T/T	C/T	C/T	T/T	NA	C/T	T/T	NA	NA	C/C	T/T	C/T	C/T	C/C	C/C	C/C	C/T	C/T	C/T
ST4.03ch01pos57945337.1	1	57945337	C/T	C/C	C/C	C/T	C/T	C/T	C/T	C/T	T/T	C/C	C/T	C/C	C/C	C/T	NA	C/C	C/T	C/C	T/T	C/C	NA	NA	C/C	C/C	C/T	C/C	C/T	C/T	C/T	C/T	C/T	T/T	C/T	C/T	C/T	C/T	C/T	C/C	C/C	C/C	C/T	C/C	C/C	C/C	NA	C/T	C/T
ST4.03ch01pos57945361.1	1	57945361	T/T	T/T	T/T	T/T	T/T	T/T	NA	T/T	T/T	T/G	T/T	T/G	T/G	T/T	T/T	T/G	T/T	T/T	T/T	G/G	NA	T/G	T/G	T/G	T/G	T/T	T/G	T/G	T/G	NA	T/T	T/T	T/T	T/T	T/T	T/G	T/T	T/T	T/G	T/G	T/G	T/T	T/T	T/T	T/G	T/T	T/T
ST4.03ch01pos58944826.1	1	58944826	C/C	C/C	C/C	C/C	C/C	C/C	C/C	C/C	C/C	C/C	C/C	C/C	C/C	C/C	C/C	NA	C/C	C/C	C/C	C/C	NA	C/C	C/C	C/C	C/T	C/C	C/C	C/C	C/C	NA	C/C	C/C	C/T	C/C	C/T	C/C	NA	C/C	C/C	C/C	C/T	C/C	C/C	C/C	C/C	C/C	C/C
ST4.03ch01pos59286551.1	1	59286551	T/C	T/C	T/C	T/T	T/T	T/T	T/T	T/T	T/T	T/T	T/T	T/T	T/T	T/T	T/T	T/T	C/C	T/C	T/C	T/T	T/C	NA	T/T	T/T	T/C	T/C	T/T	T/T	T/C	T/C	T/T	T/C	C/C	T/T	T/C	T/C	T/C	T/T	T/T	T/T	T/C	T/T	T/C	T/C	T/T	T/T	T/T
ST4.03ch01pos59395572.1	1	59395572	A/A	NA	A/A	A/A	A/A	A/A	NA	A/A	A/A	A/A	NA	A/A	A/T	A/A	NA	NA	A/A	A/T	A/A	A/T	NA	NA	NA	NA	A/T	NA	A/T	A/T	NA	A/T	A/A	A/A	A/A	A/A	A/A	NA	A/T	A/A	A/A	NA	A/T	A/A	A/T	A/A	A/A	A/A	A/A
ST4.03ch01pos59395603.1	1	59395603	A/A	NA	A/A	A/A	A/A	A/A	A/A	A/A	A/A	A/A	A/A	A/A	A/A	A/A	NA	A/A	A/A	A/C	A/A	A/A	NA	NA	NA	A/A	A/C	NA	A/A	A/A	A/A	A/C	A/A	A/A	A/A	A/A	A/A	A/A	NA	A/A	A/A	A/A	A/C	A/A	A/C	A/A	A/A	A/A	A/A
ST4.03ch01pos59492456.1	1	59492456	G/T	G/T	G/T	G/G	T/T	G/T	G/T	G/T	G/G	T/T	G/G	T/T	NA	G/T	T/T	G/T	G/G	G/T	G/T	G/T	G/G	T/T	G/T	G/T	G/G	G/T	G/G	G/G	G/G	G/T	G/T	G/G	G/T	T/T	G/G	G/T	G/G	T/T	T/T	NA	G/G	T/T	G/T	G/T	T/T	G/T	NA
ST4.03ch01pos59492458.1	1	59492458	C/T	C/T	C/T	C/C	T/T	C/T	C/T	C/T	C/C	T/T	C/C	T/T	NA	C/T	T/T	C/T	C/C	C/T	C/T	C/T	C/C	T/T	C/T	C/T	C/C	C/T	C/C	C/C	C/C	C/T	C/T	C/C	C/T	T/T	C/C	C/T	C/C	T/T	T/T	NA	C/C	T/T	C/T	C/T	T/T	C/T	C/T
ST4.03ch01pos59492459.1	1	59492459	G/A	G/A	G/A	G/G	A/A	G/A	G/A	G/A	G/G	A/A	G/G	A/A	NA	G/A	A/A	G/A	G/G	G/A	G/A	G/A	G/G	A/A	G/A	G/A	NA	G/A	G/G	G/G	G/A	G/A	G/A	G/G	G/A	A/A	G/A	G/A	G/A	A/A	A/A	NA	NA	A/A	G/A	G/A	A/A	G/A	G/A
ST4.03ch01pos59492465.1	1	59492465	C/A	C/A	NA	C/A	A/A	C/A	C/A	C/A	C/C	A/A	C/A	A/A	C/A	C/A	A/A	C/A	C/A	A/A	C/A	C/A	C/C	A/A	C/A	C/A	NA	A/A	C/C	C/C	C/A	C/A	C/A	C/C	A/A	A/A	C/A	C/A	C/A	A/A	A/A	NA	NA	A/A	C/A	C/A	A/A	C/A	C/A
ST4.03ch01pos59492483.1	1	59492483	C/C	C/C	C/C	C/C	C/C	C/C	C/C	C/C	C/C	C/C	C/C	C/C	C/C	C/C	C/C	C/C	C/C	C/C	C/C	C/C	C/C	C/C	C/C	C/C	C/T	C/C	C/C	C/C	C/C	NA	C/C	C/C	C/T	C/C	C/T	C/C	C/T	C/C	C/C	C/C	C/T	C/C	C/C	C/C	C/C	C/C	C/C
ST4.03ch01pos59492484.1	1	59492484	A/G	A/G	NA	A/G	G/G	A/G	A/G	A/G	A/A	G/G	A/G	G/G	NA	A/G	G/G	A/G	A/G	G/G	A/G	A/G	A/A	G/G	A/G	A/G	NA	G/G	A/A	A/A	A/G	A/G	A/G	A/A	G/G	G/G	A/G	A/G	A/G	G/G	G/G	NA	NA	G/G	A/G	A/G	G/G	A/G	A/G
ST4.03ch01pos59492492.1	1	59492492	C/C	C/T	C/T	C/T	C/C	C/C	C/C	C/C	C/C	C/C	C/T	C/C	C/C	C/C	C/C	C/C	C/T	C/T	C/C	C/C	C/C	C/C	C/C	C/C	C/C	C/T	C/C	C/C	C/C	C/T	C/C	C/C	C/C	C/C	C/C	C/C	C/C	C/C	C/C	C/C	C/C	C/C	C/T	C/C	C/C	C/C	C/C
ST4.03ch01pos59492506.1	1	59492506	A/C	A/C	NA	A/C	C/C	A/C	A/C	A/C	A/A	C/C	A/C	C/C	NA	A/C	C/C	A/C	A/C	C/C	A/C	A/C	A/A	C/C	A/C	A/C	NA	C/C	A/A	A/A	A/C	A/C	A/C	A/A	C/C	C/C	A/C	A/C	A/C	C/C	C/C	NA	NA	C/C	A/C	A/C	C/C	A/C	A/C
ST4.03ch01pos59492519.1	1	59492519	A/A	A/C	A/C	A/C	A/A	A/A	A/A	A/A	A/A	A/A	A/C	A/A	A/A	A/A	A/A	A/A	A/C	A/C	A/A	A/A	A/A	A/A	A/A	A/A	A/A	A/C	A/A	A/A	A/A	A/C	A/A	A/A	A/A	A/A	A/A	A/A	A/A	A/A	A/A	A/A	A/A	A/A	A/C	A/A	A/A	A/A	A/A
ST4.03ch01pos59502207.1	1	59502207	G/A	NA	G/A	NA	G/A	G/A	G/A	G/A	G/G	A/A	G/A	A/A	G/A	NA	NA	G/A	G/A	G/A	NA	G/A	NA	NA	NA	NA	G/G	NA	NA	G/G	NA	G/A	G/A	NA	NA	G/A	G/A	G/G	G/A	A/A	A/A	G/A	G/A	A/A	G/A	G/A	A/A	G/A	G/A
ST4.03ch01pos59502208.1	1	59502208	A/G	G/G	G/G	G/G	G/G	G/G	NA	G/G	G/G	G/G	G/G	G/G	A/G	G/G	NA	A/G	A/G	G/G	NA	A/G	NA	NA	NA	NA	G/G	G/G	NA	A/G	A/G	NA	G/G	NA	NA	G/G	G/G	A/G	NA	G/G	G/G	A/G	G/G	G/G	G/G	A/G	G/G	G/G	G/G
ST4.03ch01pos59502246.1	1	59502246	T/G	NA	T/G	NA	T/G	T/G	T/G	T/G	T/T	G/G	T/G	G/G	T/G	T/G	NA	T/G	T/G	T/G	NA	T/G	NA	NA	NA	T/G	T/T	NA	NA	T/T	NA	T/G	T/G	NA	NA	T/G	T/G	T/T	T/G	G/G	G/G	T/G	T/G	G/G	T/G	T/G	NA	T/G	T/G
ST4.03ch01pos59786454.1	1	59786454	A/T	A/T	A/A	NA	A/A	A/A	A/A	A/A	A/A	A/A	NA	A/A	A/T	A/A	A/A	A/T	T/T	A/A	A/T	A/T	A/T	A/T	A/T	A/T	A/A	A/A	A/T	T/T	A/T	A/T	A/A	A/T	A/A	A/A	A/A	A/T	A/T	A/A	A/A	A/T	A/A	A/A	A/A	A/T	A/A	A/A	A/A
ST4.03ch01pos59789221.1	1	59789221	C/C	NA	C/C	C/C	C/C	NA	C/C	C/T	C/T	C/C	C/C	C/C	C/C	C/T	C/C	C/C	C/C	C/C	C/C	C/C	NA	NA	C/C	NA	C/T	C/C	C/T	C/C	NA	NA	C/C	NA	C/C	C/T	C/C	C/T	C/T	C/C	C/C	C/C	C/T	C/C	C/C	C/C	C/C	C/C	C/C
ST4.03ch01pos59828731.1	1	59828731	G/G	G/A	G/A	G/A	G/G	G/G	G/G	G/G	G/G	G/G	G/A	G/G	G/G	G/G	G/G	G/G	G/A	G/A	G/G	G/G	NA	G/G	G/G	G/G	G/G	G/A	G/G	G/G	G/G	NA	G/G	G/G	G/G	G/G	G/G	G/G	G/G	G/G	G/G	G/G	G/G	G/G	G/A	G/G	G/G	G/G	G/G
ST4.03ch01pos59828755.1	1	59828755	G/G	NA	G/T	G/T	NA	G/T	G/T	G/T	T/T	G/G	G/T	G/G	G/G	G/T	G/T	G/G	G/G	G/T	G/G	G/G	NA	G/G	NA	G/G	T/T	G/T	G/T	G/T	G/T	G/T	G/T	G/T	NA	G/T	T/T	G/T	G/T	G/G	G/G	G/G	T/T	G/G	G/T	G/G	G/G	G/T	G/T
ST4.03ch01pos59828772.1	1	59828772	G/G	G/G	G/G	G/G	G/G	G/C	G/G	G/C	G/C	G/G	G/G	G/G	G/G	G/C	G/G	G/G	G/G	G/G	G/G	G/G	NA	G/G	G/G	G/G	G/C	G/G	G/C	G/G	G/C	G/G	G/G	G/C	G/G	G/C	G/G	G/C	G/C	G/G	G/G	G/G	G/C	G/G	G/G	G/G	G/G	G/G	G/G
ST4.03ch01pos60028100.1	1	60028100	T/T	NA	T/A	T/A	T/A	T/T	NA	T/T	T/T	T/T	T/A	T/T	T/A	T/T	T/T	NA	T/A	T/A	T/T	T/T	T/T	T/T	NA	T/A	T/T	T/A	T/T	T/T	T/T	NA	T/T	T/T	NA	T/A	T/T	NA	T/T	T/A	T/A	NA	T/T	T/A	T/A	T/A	T/T	T/T	T/T
ST4.03ch01pos60303947.1	1	60303947	A/T	A/T	T/T	T/T	T/T	A/T	A/T	A/T	A/T	T/T	T/T	T/T	A/T	A/T	T/T	A/T	A/T	T/T	A/T	A/T	A/A	A/T	A/T	A/T	A/T	T/T	A/A	A/T	A/T	A/T	T/T	A/A	A/T	A/T	T/T	A/T	A/T	T/T	T/T	A/T	A/T	T/T	T/T	A/T	T/T	T/T	T/T
ST4.03ch01pos60303968.1	1	60303968	A/G	A/G	G/G	G/G	G/G	A/G	A/G	A/G	A/G	G/G	G/G	G/G	A/G	A/G	G/G	A/G	A/G	G/G	A/G	A/G	A/A	A/G	A/G	A/G	A/G	G/G	A/A	A/G	A/G	A/G	G/G	A/A	A/G	A/G	G/G	A/G	A/G	G/G	G/G	A/G	A/G	G/G	G/G	A/G	G/G	G/G	G/G
ST4.03ch01pos60303974.1	1	60303974	C/G	C/G	G/G	G/G	G/G	C/G	C/G	C/G	C/G	G/G	G/G	G/G	C/G	C/G	G/G	C/G	C/G	G/G	C/G	C/G	C/C	C/G	C/G	C/G	C/G	G/G	C/C	C/G	C/G	C/G	G/G	C/C	C/G	C/G	G/G	C/G	C/G	G/G	G/G	C/G	C/G	G/G	G/G	C/G	G/G	G/G	G/G
ST4.03ch01pos60304010.1	1	60304010	A/G	A/G	G/G	G/G	G/G	A/G	A/G	A/G	A/G	G/G	G/G	G/G	A/G	A/G	G/G	A/G	A/G	G/G	A/G	A/G	A/A	A/G	A/G	A/G	A/G	G/G	A/A	A/G	A/G	A/G	G/G	A/A	A/G	A/G	G/G	A/G	A/G	G/G	G/G	A/G	A/G	G/G	G/G	A/G	G/G	G/G	G/G
ST4.03ch01pos60400762.1	1	60400762	A/C	A/A	A/A	A/A	A/A	A/A	A/A	A/A	A/A	A/A	A/A	A/A	A/C	A/A	A/A	NA	NA	A/A	A/C	A/C	NA	A/A	NA	A/C	A/A	A/A	A/C	A/C	A/C	A/C	A/A	A/A	NA	A/A	A/A	A/A	A/C	A/A	A/A	A/C	A/A	A/A	A/A	A/C	A/A	A/A	A/A
ST4.03ch01pos60411883.1	1	60411883	G/G	G/G	G/G	G/G	G/G	G/G	G/G	G/G	G/G	G/G	G/G	G/G	G/G	G/G	G/G	G/G	G/G	G/G	G/G	G/G	G/G	G/G	G/G	G/G	G/G	G/A	G/G	G/G	G/G	G/G	G/G	G/G	G/A	G/G	G/A	G/G	NA	G/G	G/A	G/G	G/G	G/G	G/G	G/G	G/G	G/G	G/G
ST4.03ch01pos60462738.1	1	60462738	T/C	T/C	T/T	T/T	T/T	T/C	T/T	T/C	T/C	T/T	T/T	T/T	T/C	T/C	T/T	T/C	T/C	T/T	T/C	T/C	T/C	T/C	T/C	T/C	T/C	T/C	T/C	T/C	T/C	T/C	T/T	T/C	T/C	T/C	T/T	T/C	T/C	T/T	T/T	T/C	T/C	T/T	T/T	T/C	T/T	T/T	T/T
ST4.03ch01pos60462752.1	1	60462752	C/C	C/C	C/C	C/C	C/A	C/C	NA	C/C	C/C	C/C	C/C	C/C	C/A	C/C	C/C	C/A	C/C	C/C	C/C	C/C	C/C	C/C	C/A	C/A	C/A	C/C	C/C	C/C	C/C	C/A	C/C	C/C	C/A	C/A	C/C	C/C	NA	C/A	C/C	C/A	C/A	C/A	C/C	C/A	C/C	C/C	C/C
ST4.03ch01pos60462761.1	1	60462761	G/G	G/G	G/G	G/G	G/T	G/G	G/T	G/G	G/G	G/G	G/G	G/G	G/T	G/G	G/G	G/T	G/G	G/G	G/G	G/G	G/G	G/G	G/T	G/T	G/T	G/G	G/G	G/G	G/G	G/T	G/G	G/G	G/T	G/T	G/G	G/G	NA	G/T	G/G	G/T	G/T	G/T	G/G	G/T	G/G	G/G	G/G
ST4.03ch01pos60462791.1	1	60462791	A/A	A/A	A/A	A/A	A/T	A/A	A/T	A/A	A/A	A/A	A/A	A/A	A/T	A/A	A/A	A/T	A/A	A/A	A/A	A/A	A/A	A/A	A/T	A/T	A/A	A/A	A/A	A/A	A/A	A/A	A/A	A/A	A/A	A/T	A/A	A/A	A/A	A/T	A/A	A/T	A/A	A/T	A/A	A/T	A/A	A/A	A/A
ST4.03ch01pos60575646.1	1	60575646	G/G	G/T	G/T	G/T	G/T	G/G	G/G	G/G	G/G	G/G	G/T	G/G	G/G	G/G	G/G	G/G	G/T	G/T	G/G	G/G	G/G	G/G	G/G	G/G	G/G	G/T	G/G	G/G	G/G	G/T	G/G	G/G	G/T	G/G	G/T	G/G	G/G	G/T	G/G	G/G	G/G	G/T	G/T	G/G	G/G	G/G	G/G
ST4.03ch01pos60888916.1	1	60888916	C/C	C/C	C/C	C/C	C/C	C/C	NA	C/C	C/C	C/C	C/C	C/C	C/C	C/C	C/C	C/C	C/C	C/C	C/C	C/C	C/C	C/C	C/C	C/C	C/C	C/C	C/C	C/C	C/C	C/C	C/C	C/C	C/C	C/T	C/C	C/C	C/C	C/C	C/C	C/C	C/C	C/C	C/C	C/T	C/C	C/C	C/C
ST4.03ch01pos60888992.1	1	60888992	A/A	G/A	G/A	G/A	G/A	A/A	A/A	A/A	A/A	A/A	G/A	A/A	A/A	A/A	A/A	A/A	A/A	G/A	A/A	A/A	A/A	A/A	A/A	A/A	G/A	G/A	A/A	A/A	A/A	G/A	A/A	A/A	G/G	A/A	G/A	A/A	A/A	G/A	A/A	A/A	G/A	G/A	G/A	A/A	A/A	A/A	A/A
ST4.03ch01pos60888994.1	1	60888994	G/G	A/G	A/G	A/G	A/G	G/G	G/G	G/G	G/G	G/G	A/G	G/G	G/G	G/G	G/G	G/G	G/G	A/G	G/G	G/G	G/G	G/G	G/G	G/G	G/G	A/G	G/G	G/G	G/G	G/G	G/G	G/G	G/G	G/G	G/G	G/G	G/G	A/G	G/G	G/G	G/G	A/G	A/G	G/G	G/G	G/G	G/G
ST4.03ch01pos60981178.1	1	60981178	C/T	C/T	C/C	C/T	C/T	C/C	NA	C/C	C/C	C/T	C/T	C/T	C/T	C/C	C/C	C/T	C/T	C/C	C/T	T/T	C/T	C/T	C/T	C/T	C/C	C/T	C/T	C/T	C/T	C/T	C/C	C/T	C/T	C/C	C/T	C/T	C/T	C/T	C/T	C/T	C/C	C/T	C/C	C/T	C/T	C/C	C/C
ST4.03ch01pos60986300.1	1	60986300	C/T	NA	C/C	C/T	NA	C/C	NA	C/C	C/C	C/T	C/T	C/T	C/T	C/C	C/C	C/T	C/T	C/C	NA	T/T	NA	C/T	C/T	C/T	C/C	NA	C/T	C/T	C/T	C/T	C/C	C/T	NA	C/C	C/T	C/T	C/T	C/T	C/T	C/T	C/C	C/T	C/C	C/T	C/T	C/C	C/C
ST4.03ch01pos61126852.1	1	61126852	A/A	A/A	A/A	A/C	A/C	A/A	A/C	A/A	A/C	A/C	A/C	A/C	A/A	A/A	C/C	A/A	A/A	A/A	A/A	A/A	A/A	A/C	NA	A/A	A/A	A/A	A/A	A/C	A/C	A/A	C/C	A/A	A/A	A/A	A/C	A/C	A/A	A/A	A/C	A/A	A/A	A/A	A/A	A/A	A/C	C/C	C/C
ST4.03ch01pos61223259.1	1	61223259	NA	NA	T/C	T/C	T/C	T/C	NA	T/C	NA	T/T	T/C	T/T	T/T	T/C	C/C	T/T	T/T	T/C	T/C	T/T	NA	T/T	T/T	T/T	T/T	T/C	NA	T/C	T/C	T/C	C/C	T/T	T/T	T/C	NA	T/C	T/T	T/C	T/T	T/T	T/T	T/C	T/C	T/C	NA	C/C	C/C
ST4.03ch01pos61256637.1	1	61256637	A/A	G/A	G/A	G/A	G/A	G/A	A/A	G/A	G/A	G/A	G/A	G/A	G/A	G/A	A/A	G/A	G/A	G/A	G/G	G/A	G/A	G/A	G/A	G/A	G/A	G/A	G/A	A/A	G/A	G/A	G/A	G/A	NA	G/A	A/A	G/A	G/A	G/A	A/A	G/A	G/A	G/A	NA	G/G	G/A	A/A	G/A
ST4.03ch01pos61256663.1	1	61256663	T/T	C/T	C/T	C/T	C/T	C/T	T/T	C/T	C/T	C/T	C/T	C/T	C/T	C/T	T/T	C/T	C/T	C/T	C/C	C/T	C/T	C/T	C/T	C/T	C/T	C/T	C/T	T/T	C/T	C/T	C/T	C/T	T/T	C/T	T/T	C/T	C/T	C/T	T/T	C/T	C/T	C/T	NA	C/C	C/T	T/T	C/T
ST4.03ch01pos61269384.1	1	61269384	C/C	NA	C/C	C/C	C/C	C/G	C/C	C/G	C/G	C/C	C/C	C/C	C/C	C/G	NA	C/C	C/G	C/C	C/C	C/C	NA	NA	NA	C/C	NA	NA	NA	C/C	NA	C/G	C/C	C/G	C/C	C/G	C/C	C/G	C/G	C/C	C/C	C/C	C/G	C/C	C/C	C/C	C/C	C/C	C/C
ST4.03ch01pos61304214.1	1	61304214	NA	A/C	A/C	A/C	A/C	A/C	NA	A/C	A/C	A/C	A/C	A/C	A/C	A/C	C/C	A/C	A/C	A/C	A/C	NA	NA	NA	A/C	NA	C/C	A/C	A/A	A/C	A/C	A/C	C/C	A/A	C/C	A/C	C/C	A/C	A/C	A/C	A/C	A/C	C/C	A/C	A/C	A/C	A/C	C/C	C/C
ST4.03ch01pos61360348.1	1	61360348	C/G	NA	C/C	C/G	C/G	C/G	C/G	C/G	C/G	C/G	C/G	C/G	C/C	C/G	G/G	NA	C/C	C/C	C/G	C/G	C/C	C/G	C/C	C/C	C/G	C/G	C/C	C/G	C/G	C/G	G/G	NA	G/G	C/C	G/G	C/G	C/C	C/G	C/G	C/C	C/G	C/G	C/C	C/C	C/G	G/G	G/G
ST4.03ch01pos62267965.1	1	62267965	T/T	T/T	T/A	T/T	T/T	T/T	T/A	T/T	T/T	T/T	T/T	T/T	T/T	T/T	T/T	T/T	T/T	T/A	T/T	T/T	T/T	T/T	T/T	T/T	T/T	T/T	T/T	T/T	T/T	T/A	T/T	T/T	T/A	T/A	T/T	T/T	T/T	T/T	T/A	T/T	T/T	T/T	T/A	T/A	T/T	T/T	T/T
ST4.03ch01pos62268033.1	1	62268033	A/A	A/G	A/A	A/G	A/G	A/A	A/A	A/A	A/A	A/A	A/G	A/A	A/A	A/A	A/A	A/A	A/G	A/A	G/G	A/A	A/G	NA	A/A	A/A	A/G	A/G	A/A	A/A	A/G	A/G	A/A	A/G	A/G	A/A	A/G	A/G	A/G	G/G	A/A	A/A	A/G	G/G	A/A	A/A	A/A	A/A	A/A
ST4.03ch01pos62325789.1	1	62325789	C/C	NA	T/T	C/T	C/C	C/T	C/T	C/C	T/T	T/T	C/C	T/T	C/C	C/C	C/T	C/C	C/T	T/T	C/C	C/T	C/C	NA	C/C	C/C	C/C	C/T	C/T	NA	C/T	C/C	C/T	C/C	C/C	C/C	C/T	C/T	C/C	C/C	NA	C/C	C/C	C/C	T/T	C/T	C/T	C/T	C/C
ST4.03ch01pos62397523.1	1	62397523	A/A	A/T	A/T	T/T	NA	A/T	A/T	A/T	T/T	T/T	T/T	T/T	A/A	A/T	A/T	A/A	T/T	A/T	NA	A/T	A/A	T/T	A/A	A/A	NA	A/T	A/T	A/T	A/T	A/T	A/T	A/A	A/A	T/T	T/T	A/T	A/A	A/A	A/T	A/A	NA	A/A	A/T	A/T	A/T	A/T	A/T
ST4.03ch01pos62571450.1	1	62571450	T/T	NA	C/T	C/T	C/T	NA	T/T	C/T	NA	C/C	C/T	C/C	T/T	C/T	T/T	T/T	C/C	C/T	NA	C/T	NA	NA	T/T	T/T	C/T	C/T	C/T	T/T	NA	C/T	T/T	C/T	NA	C/T	C/T	C/T	C/T	C/T	NA	T/T	C/T	C/T	C/T	C/T	C/T	T/T	T/T
ST4.03ch01pos62571472.1	1	62571472	T/T	NA	T/T	T/C	T/C	T/T	T/T	T/T	T/T	T/T	T/C	T/T	T/T	T/T	T/T	T/T	T/C	T/T	NA	T/T	NA	NA	T/T	T/T	T/T	NA	T/T	T/T	NA	T/C	T/T	T/C	NA	T/T	T/T	T/C	T/C	T/C	NA	T/T	T/T	T/C	T/T	T/T	T/T	T/T	T/T
ST4.03ch01pos62768987.1	1	62768987	T/A	T/A	T/T	T/T	T/A	T/A	T/A	T/A	T/T	A/A	T/T	A/A	T/A	T/A	T/A	T/A	T/T	T/T	T/A	T/A	T/T	T/A	T/A	T/A	T/A	T/A	T/T	T/T	T/T	T/A	T/A	T/T	T/A	T/T	T/A	T/T	T/A	T/A	A/A	T/A	T/A	T/A	T/T	T/T	T/A	T/A	T/A
ST4.03ch01pos62851497.1	1	62851497	C/T	NA	T/T	T/T	T/T	T/T	C/T	T/T	T/T	C/T	T/T	C/T	C/T	T/T	T/T	C/T	T/T	T/T	T/T	C/T	NA	NA	C/T	C/T	C/T	T/T	C/T	C/T	C/T	C/T	T/T	C/T	C/T	T/T	T/T	C/T	C/T	T/T	T/T	C/T	C/T	T/T	T/T	C/T	C/T	T/T	T/T
ST4.03ch01pos62851515.1	1	62851515	C/T	C/C	NA	C/T	C/T	C/T	C/T	C/T	C/T	C/T	C/T	C/T	C/T	C/T	T/T	C/T	C/C	C/T	C/T	C/T	NA	C/T	C/T	C/T	C/T	C/T	C/C	C/T	C/T	C/T	T/T	C/C	C/T	C/C	T/T	C/T	NA	C/T	T/T	C/T	C/T	C/T	C/T	C/C	C/T	T/T	T/T
ST4.03ch01pos62851521.1	1	62851521	G/A	G/G	NA	G/A	G/A	G/A	G/A	G/A	G/A	G/A	G/A	G/A	G/A	G/A	A/A	G/A	G/G	G/A	G/A	G/A	NA	G/A	G/A	G/A	G/A	G/A	G/G	G/A	G/A	G/A	A/A	G/G	G/A	G/G	A/A	G/A	NA	G/A	A/A	G/A	G/A	G/A	G/A	G/G	G/A	A/A	A/A
ST4.03ch01pos62870749.1	1	62870749	A/A	A/G	A/G	A/G	A/G	A/G	NA	A/G	A/G	A/A	A/G	A/A	A/A	A/G	A/A	A/A	A/G	A/G	A/G	A/A	NA	A/A	A/A	A/A	A/A	A/G	NA	A/A	NA	A/G	A/A	A/G	NA	A/G	A/A	A/G	A/G	A/G	A/A	A/A	A/A	A/G	A/G	A/G	A/A	A/A	A/A
ST4.03ch01pos62977770.1	1	62977770	G/A	G/A	A/A	G/A	G/A	G/A	G/A	G/A	A/A	G/A	G/A	G/A	G/A	G/A	G/A	G/A	G/A	A/A	G/G	G/A	NA	G/A	G/A	G/A	G/A	G/A	A/A	A/A	G/A	G/A	G/A	G/A	G/A	A/A	G/A	G/A	G/A	G/G	G/G	G/A	G/A	G/G	A/A	A/A	G/A	G/A	G/A
ST4.03ch01pos63017301.1	1	63017301	T/T	T/T	T/T	T/T	T/T	T/T	T/T	T/T	T/T	C/T	T/T	C/T	T/T	T/T	T/T	T/T	T/T	T/T	T/T	C/T	T/T	C/T	T/T	T/T	C/T	T/T	T/T	T/T	T/T	C/T	T/T	T/T	C/T	T/T	C/T	T/T	C/T	T/T	C/T	T/T	C/T	T/T	T/T	T/T	C/T	T/T	T/T
ST4.03ch01pos63017308.1	1	63017308	G/G	G/G	G/G	G/G	G/G	G/G	G/G	G/G	G/G	A/G	G/G	A/G	G/G	G/G	G/G	G/G	G/G	G/G	G/G	A/G	G/G	A/G	G/G	G/G	A/G	G/G	G/G	G/G	G/G	A/G	G/G	G/G	A/G	G/G	A/G	G/G	A/G	G/G	A/G	G/G	A/G	G/G	G/G	G/G	A/G	G/G	G/G
ST4.03ch01pos63017317.1	1	63017317	C/C	C/C	C/C	C/C	C/C	C/C	C/C	C/C	C/C	C/T	C/C	C/T	C/C	C/C	C/C	C/C	C/C	C/C	C/C	C/T	C/C	C/T	C/C	C/C	C/T	C/C	C/C	C/C	C/C	C/T	C/C	C/C	C/T	C/C	C/T	C/C	C/T	C/C	C/T	C/C	C/T	C/C	C/C	C/C	C/T	C/C	C/C
ST4.03ch01pos63251235.1	1	63251235	G/G	A/G	G/G	A/G	A/G	G/G	G/G	G/G	G/G	G/G	A/G	G/G	G/G	G/G	G/G	G/G	A/G	G/G	A/G	G/G	A/G	A/G	G/G	G/G	A/G	A/G	G/G	G/G	A/G	A/G	G/G	A/G	A/G	G/G	G/G	A/G	A/G	A/G	A/A	G/G	A/G	A/G	G/G	G/G	G/G	G/G	G/G
ST4.03ch01pos63251242.1	1	63251242	A/A	G/A	A/A	G/A	G/A	A/A	A/A	A/A	A/A	A/A	G/A	A/A	A/A	A/A	A/A	A/A	G/A	A/A	G/A	A/A	G/A	G/A	A/A	A/A	G/A	G/A	A/A	A/A	G/A	G/A	A/A	G/A	G/A	A/A	A/A	G/A	G/A	G/A	G/G	A/A	G/A	G/A	A/A	A/A	A/A	A/A	A/A
ST4.03ch01pos63272339.1	1	63272339	C/C	C/C	C/C	C/C	C/C	C/C	C/C	C/C	C/C	C/C	C/C	C/C	C/C	C/C	C/C	C/C	C/C	C/C	C/C	C/C	C/C	C/C	C/C	C/C	C/C	C/C	C/C	C/C	C/C	C/C	C/C	C/C	C/C	C/C	C/C	C/C	C/C	C/C	C/C	C/C	C/C	C/C	C/C	C/C	C/C	C/C	C/C
ST4.03ch01pos63272345.1	1	63272345	G/G	G/A	G/G	G/A	G/A	G/G	G/G	G/G	G/G	G/G	G/A	G/G	G/G	G/G	G/G	G/G	G/A	G/G	G/A	G/G	G/A	G/G	G/G	G/G	G/G	G/G	G/G	G/G	G/G	G/A	G/G	G/A	G/G	G/G	G/G	G/A	G/A	G/A	G/G	G/G	G/G	G/A	G/G	G/G	G/G	G/G	G/G
ST4.03ch01pos63272369.1	1	63272369	G/G	T/G	G/G	T/G	T/G	G/G	G/G	G/G	G/G	G/G	T/G	G/G	G/G	G/G	G/G	G/G	T/G	G/G	T/G	G/G	T/G	G/G	G/G	G/G	G/G	G/G	G/G	G/G	G/G	T/G	G/G	T/G	G/G	G/G	G/G	T/G	T/G	T/G	G/G	G/G	G/G	T/G	G/G	G/G	G/G	G/G	G/G
ST4.03ch01pos63272401.1	1	63272401	G/G	A/G	G/G	A/G	A/G	G/G	G/G	G/G	G/G	G/G	A/G	G/G	G/G	G/G	G/G	G/G	A/G	G/G	A/G	G/G	A/G	G/G	G/G	G/G	G/G	G/G	G/G	G/G	G/G	A/G	G/G	A/G	G/G	G/G	G/G	A/G	A/G	A/G	G/G	G/G	G/G	A/G	G/G	G/G	G/G	G/G	G/G
ST4.03ch01pos63314448.1	1	63314448	G/G	G/G	G/G	A/G	A/G	G/G	A/G	G/G	A/G	G/G	A/G	G/G	G/G	G/G	A/G	G/G	G/G	G/G	G/G	G/G	G/G	G/G	G/G	G/G	A/G	G/G	G/G	A/G	A/G	G/G	A/G	G/G	A/G	G/G	A/G	A/G	G/G	G/G	A/G	G/G	A/G	G/G	G/G	G/G	G/G	A/G	A/G
ST4.03ch01pos63327280.1	1	63327280	T/T	T/T	T/T	C/T	C/T	T/T	C/T	T/T	C/T	T/T	C/T	T/T	T/T	T/T	C/T	T/T	T/T	T/T	T/T	T/T	T/T	T/T	T/T	T/T	C/T	T/T	T/T	C/T	C/T	T/T	C/T	T/T	NA	T/T	C/T	C/T	T/T	T/T	C/T	T/T	C/T	T/T	T/T	T/T	NA	C/T	C/T
ST4.03ch01pos63327307.1	1	63327307	T/T	T/T	T/T	A/T	A/T	T/T	A/T	T/T	A/T	T/T	A/T	T/T	T/T	T/T	A/T	T/T	T/T	T/T	T/T	T/T	T/T	T/T	T/T	T/T	A/T	T/T	T/T	A/T	A/T	T/T	A/T	T/T	NA	T/T	A/T	A/T	T/T	T/T	A/T	T/T	A/T	T/T	T/T	T/T	NA	A/T	A/T
ST4.03ch01pos63686110.1	1	63686110	G/G	G/G	G/G	G/G	G/G	G/G	G/G	G/G	G/G	G/G	G/G	G/G	G/G	G/G	NA	G/G	G/G	G/G	G/G	G/G	NA	NA	G/G	G/G	G/A	G/G	G/G	NA	G/G	G/A	G/G	G/G	NA	G/G	A/A	G/G	G/A	G/G	G/G	G/G	G/A	G/G	G/G	G/G	G/G	G/G	G/G
ST4.03ch01pos63686156.1	1	63686156	C/C	C/C	C/C	C/C	C/C	C/C	C/C	C/C	C/C	C/C	C/C	C/C	C/C	C/C	NA	C/C	C/C	C/C	C/C	C/C	NA	NA	C/C	C/C	C/C	C/C	C/C	NA	C/C	C/G	C/C	C/C	C/C	C/C	G/G	C/C	C/G	C/C	C/C	C/C	C/C	C/C	C/C	C/C	C/C	C/C	C/C
ST4.03ch01pos63686164.1	1	63686164	T/T	T/T	T/T	T/T	T/T	T/T	T/T	T/T	T/T	T/T	T/T	T/T	T/T	T/T	NA	T/T	T/T	T/T	T/T	T/T	NA	NA	T/T	T/T	A/T	T/T	T/T	NA	T/T	A/T	T/T	T/T	T/T	T/T	A/A	T/T	A/T	T/T	T/T	T/T	A/T	T/T	T/T	T/T	T/T	T/T	T/T
ST4.03ch01pos63687190.1	1	63687190	T/T	T/T	T/T	G/T	NA	T/T	G/T	T/T	G/T	T/T	G/T	T/T	T/T	T/T	G/T	T/T	T/T	T/T	T/T	T/T	T/T	T/T	T/T	T/T	G/T	T/T	T/T	G/G	G/T	T/T	G/T	T/T	G/T	T/T	G/G	G/T	T/T	T/T	G/G	T/T	G/T	T/T	T/T	T/T	T/T	G/T	G/T
ST4.03ch01pos63687205.1	1	63687205	T/T	T/T	T/T	C/T	NA	T/T	C/T	T/T	C/T	T/T	C/T	T/T	T/T	T/T	C/T	T/T	T/T	T/T	T/T	T/T	T/T	T/T	T/T	T/T	C/T	T/T	T/T	C/C	C/T	T/T	C/T	T/T	C/T	T/T	C/C	C/T	T/T	T/T	C/C	T/T	C/T	T/T	T/T	T/T	T/T	C/T	C/T
ST4.03ch01pos63690439.1	1	63690439	T/T	T/T	T/T	G/T	G/T	T/T	G/T	T/T	G/T	T/T	G/T	T/T	T/T	T/T	G/T	T/T	T/T	T/T	T/T	T/T	T/T	T/T	T/T	T/T	G/T	T/T	T/T	G/G	G/T	G/T	G/T	T/T	G/T	T/T	G/G	G/T	T/T	T/T	G/G	T/T	G/T	T/T	T/T	T/T	T/T	G/T	G/T
ST4.03ch01pos63690454.1	1	63690454	T/T	T/T	T/T	C/T	C/T	T/T	C/T	T/T	C/T	T/T	C/T	T/T	T/T	T/T	C/T	T/T	T/T	T/T	T/T	T/T	T/T	T/T	T/T	T/T	C/T	T/T	T/T	C/C	C/T	C/T	C/T	T/T	C/T	T/T	C/C	C/T	T/T	T/T	C/C	T/T	C/T	T/T	T/T	T/T	T/T	C/T	C/T
ST4.03ch01pos63874606.1	1	63874606	A/A	A/A	A/A	G/A	G/A	A/A	G/A	A/A	G/A	G/A	G/A	G/A	A/A	A/A	G/A	A/A	A/A	A/A	A/A	A/A	A/A	G/A	A/A	A/A	G/A	A/A	A/A	G/G	G/A	G/A	G/A	A/A	NA	A/A	G/A	G/A	G/A	A/A	G/A	A/A	G/A	A/A	A/A	A/A	G/A	G/A	G/A
ST4.03ch01pos63879698.1	1	63879698	A/A	A/A	A/A	G/A	A/A	NA	G/A	A/A	G/A	A/A	NA	A/A	A/A	A/A	NA	A/A	A/A	A/A	A/A	A/A	NA	NA	NA	A/A	G/A	A/A	A/A	G/G	NA	NA	G/A	A/A	NA	A/A	G/A	G/A	A/A	A/A	G/A	A/A	G/A	A/A	A/A	A/A	A/A	G/A	G/A
ST4.03ch01pos64120297.1	1	64120297	C/A	C/A	C/C	C/C	C/C	C/C	C/A	C/C	C/C	C/C	C/C	C/C	C/A	C/C	C/C	C/A	C/C	C/C	C/C	C/A	C/A	C/A	C/A	C/A	C/A	C/C	C/A	C/A	C/A	C/A	C/C	C/A	C/C	C/C	C/C	C/A	C/A	C/C	C/A	C/A	C/A	C/C	C/C	C/A	C/C	C/C	C/C
ST4.03ch01pos64120306.1	1	64120306	C/G	C/G	C/C	C/C	C/C	C/C	C/G	C/C	C/C	C/C	C/C	C/C	C/G	C/C	C/C	C/G	C/C	C/C	C/C	C/G	C/G	C/G	C/G	C/G	C/G	C/C	C/G	C/G	C/G	C/G	C/C	C/G	C/C	C/C	C/C	C/G	C/G	C/C	C/G	C/G	C/G	C/C	C/C	C/G	C/C	C/C	C/C
ST4.03ch01pos64178741.1	1	64178741	C/C	C/C	C/C	C/C	C/C	C/C	C/C	C/C	C/C	C/C	C/C	C/C	C/C	C/C	C/C	C/C	C/C	C/C	C/C	C/C	C/C	C/C	NA	C/C	C/C	C/C	C/C	C/C	C/C	C/C	C/C	C/C	C/C	C/C	C/C	C/C	C/C	C/C	NA	C/C	C/C	C/C	C/C	C/C	C/C	C/C	C/C
ST4.03ch01pos64178743.1	1	64178743	A/A	A/A	A/A	A/A	A/A	A/A	A/A	A/A	A/A	A/G	A/A	A/G	A/A	A/A	A/A	A/A	A/A	A/A	A/A	A/A	A/A	A/G	A/A	A/A	A/A	A/A	A/A	A/A	A/A	A/A	A/A	A/A	A/G	A/A	A/A	A/A	A/A	A/A	A/A	A/A	A/A	A/A	A/A	A/A	A/G	A/A	A/A
ST4.03ch01pos64178777.1	1	64178777	T/T	T/A	T/T	T/A	T/A	T/T	T/T	T/T	T/T	T/A	T/A	T/A	T/T	T/T	T/T	T/T	T/A	T/T	T/A	T/T	T/A	T/A	NA	T/T	T/T	NA	T/T	T/T	T/A	T/A	T/T	T/A	T/A	T/T	T/T	T/A	T/A	T/A	NA	T/T	T/T	T/A	T/T	T/T	T/A	T/T	T/T
ST4.03ch01pos64273319.1	1	64273319	G/G	G/G	G/G	G/G	G/G	G/G	G/G	G/G	G/G	G/G	G/G	G/G	G/G	G/G	G/G	G/G	G/G	G/G	G/G	G/G	G/G	G/G	G/G	G/G	G/G	G/G	G/G	G/G	G/G	G/C	G/G	G/G	G/C	G/G	G/G	G/G	G/C	G/G	G/G	G/G	G/G	G/G	G/G	G/G	G/G	G/G	G/G
ST4.03ch01pos64273327.1	1	64273327	G/G	G/T	T/T	G/T	G/T	G/T	G/G	G/T	T/T	G/T	G/T	G/T	G/G	G/T	G/G	G/G	T/T	T/T	G/T	G/T	G/T	G/T	G/G	G/G	G/T	G/T	G/T	G/G	G/T	G/T	G/G	G/T	G/T	G/T	G/T	G/T	G/T	G/T	G/T	G/G	G/T	G/T	T/T	G/T	G/T	G/G	G/G
ST4.03ch01pos64273372.1	1	64273372	T/C	T/C	C/C	C/C	C/C	C/C	T/C	C/C	C/C	C/C	C/C	C/C	T/C	C/C	C/C	T/C	C/C	C/C	C/C	T/C	T/C	T/C	T/C	T/C	T/C	C/C	T/C	T/C	T/C	T/C	C/C	T/C	C/C	T/C	C/C	T/C	T/C	C/C	T/C	T/C	T/C	C/C	C/C	T/C	C/C	C/C	C/C
ST4.03ch01pos64277686.1	1	64277686	C/T	T/T	T/T	T/T	T/T	T/T	C/T	T/T	T/T	T/T	T/T	T/T	C/T	T/T	T/T	C/T	T/T	T/T	T/T	C/T	C/T	C/T	C/T	C/T	C/T	T/T	C/T	C/T	C/T	C/T	T/T	C/T	T/T	C/T	T/T	C/T	C/T	T/T	C/T	C/T	C/T	T/T	T/T	C/T	T/T	T/T	T/T
ST4.03ch01pos64355915.1	1	64355915	C/C	C/C	C/C	C/C	C/C	C/C	T/C	C/C	C/C	C/C	C/C	C/C	C/C	C/C	C/C	C/C	C/C	C/C	C/C	C/C	C/C	C/C	C/C	C/C	T/T	C/C	C/C	T/C	T/C	T/C	C/C	C/C	C/C	T/C	T/C	T/C	NA	C/C	T/C	C/C	T/T	C/C	C/C	C/C	C/C	C/C	C/C
ST4.03ch01pos64355983.1	1	64355983	G/G	G/G	G/G	G/G	G/G	G/G	C/G	G/G	G/G	G/G	G/G	G/G	G/G	G/G	G/G	G/G	G/G	G/G	G/G	G/G	G/G	G/G	G/G	G/G	C/C	G/G	G/G	C/G	C/G	C/G	G/G	G/G	G/G	C/G	C/G	C/G	C/G	G/G	C/G	G/G	C/C	G/G	G/G	G/G	G/G	G/G	G/G
ST4.03ch01pos64355999.1	1	64355999	C/C	C/C	C/C	C/C	C/C	C/C	C/T	C/C	C/C	C/C	C/C	C/C	C/C	C/C	C/C	C/C	C/C	C/C	C/C	C/C	C/C	C/C	C/C	C/C	C/T	C/C	C/C	C/T	C/T	C/C	C/C	C/C	C/C	C/T	C/T	C/T	C/C	C/C	C/T	C/C	C/T	C/C	C/C	C/C	C/C	C/C	C/C
ST4.03ch01pos64363202.1	1	64363202	T/T	T/T	T/T	T/T	T/T	T/T	T/C	T/T	T/T	T/T	T/T	T/T	T/T	T/T	T/T	T/T	T/T	T/T	T/T	T/T	T/T	T/T	T/T	T/T	T/C	T/T	T/T	T/C	T/C	T/C	T/T	T/T	T/T	T/C	T/C	T/C	T/T	T/T	T/C	T/T	T/C	T/T	T/T	T/T	T/T	T/T	T/T
ST4.03ch01pos64363221.1	1	64363221	A/A	A/A	A/A	A/A	A/A	A/A	G/A	A/A	A/A	A/A	A/A	A/A	A/A	A/A	A/A	A/A	A/A	A/A	A/A	A/A	A/A	A/A	A/A	A/A	G/A	A/A	A/A	G/A	G/A	G/A	A/A	A/A	G/A	G/A	G/A	G/A	A/A	A/A	G/A	A/A	G/A	A/A	A/A	A/A	A/A	A/A	A/A
ST4.03ch01pos64363230.1	1	64363230	C/C	C/C	C/C	C/C	C/C	C/C	C/T	C/C	C/C	C/C	C/C	C/C	C/C	C/C	C/C	C/C	C/C	C/C	C/C	C/C	C/C	C/C	C/C	C/C	C/T	C/C	C/C	C/T	C/T	C/T	C/C	C/C	C/C	C/T	C/T	C/T	C/C	C/C	C/T	C/C	C/T	C/C	C/C	C/C	C/C	C/C	C/C
ST4.03ch01pos64376683.1	1	64376683	A/A	NA	A/A	A/A	A/A	A/A	A/A	A/A	A/A	A/A	A/A	A/A	A/A	A/A	A/A	A/A	G/A	A/A	G/A	A/A	A/A	A/A	A/A	A/A	G/A	A/A	A/A	A/A	A/A	G/A	A/A	A/A	G/A	A/A	A/A	A/A	A/A	A/A	A/A	A/A	G/A	A/A	A/A	A/A	A/A	A/A	A/A
ST4.03ch01pos64394441.1	1	64394441	G/A	NA	G/A	G/G	G/G	G/A	G/A	G/A	A/A	G/A	G/G	G/A	G/A	G/A	G/G	G/A	A/A	G/A	NA	G/A	G/A	G/A	G/A	G/A	G/G	G/A	A/A	G/G	G/A	G/A	G/G	G/A	NA	A/A	G/G	G/A	G/A	G/G	A/A	G/A	G/G	G/G	G/A	A/A	G/A	G/G	G/G
ST4.03ch01pos64398329.1	1	64398329	T/T	T/C	T/T	T/T	T/T	T/T	T/T	T/T	T/T	T/T	T/T	T/T	T/T	T/T	T/T	T/T	T/C	T/T	T/C	T/T	T/T	T/T	T/T	T/T	T/C	T/C	T/T	T/T	T/T	NA	T/T	T/T	T/C	T/T	T/T	T/T	T/T	T/T	T/T	T/T	T/C	T/T	T/T	T/T	T/T	T/T	T/T
ST4.03ch01pos64398333.1	1	64398333	T/T	NA	NA	A/T	A/T	T/T	T/T	T/T	T/T	A/T	A/T	A/T	T/T	T/T	T/T	T/T	T/T	A/T	T/T	NA	NA	A/T	T/T	T/T	A/T	A/T	T/T	T/T	A/T	A/T	T/T	A/T	T/T	T/T	T/T	A/T	A/T	A/T	T/T	T/T	A/T	A/T	A/T	T/T	A/T	T/T	T/T
ST4.03ch01pos64398337.1	1	64398337	NA	NA	G/G	G/C	G/C	G/C	C/C	G/C	G/G	G/G	G/C	G/G	G/C	G/C	C/C	G/C	G/C	G/G	C/C	G/G	G/G	G/G	NA	NA	G/C	G/C	G/G	C/C	G/C	G/C	C/C	G/G	C/C	G/C	C/C	G/C	NA	G/C	G/C	G/C	G/C	G/C	G/G	G/G	G/C	C/C	C/C
ST4.03ch01pos64398340.1	1	64398340	NA	NA	A/A	A/G	A/G	A/G	G/G	A/G	A/A	A/A	A/G	A/A	A/G	A/G	G/G	A/G	A/G	A/A	G/G	A/A	A/A	A/A	NA	NA	A/G	A/G	A/A	G/G	A/G	A/G	G/G	A/A	G/G	A/G	G/G	A/G	NA	A/G	A/G	A/G	A/G	A/G	A/A	A/A	A/G	G/G	G/G
ST4.03ch01pos64398367.1	1	64398367	NA	NA	A/A	A/G	A/G	NA	G/G	A/G	A/A	A/A	A/G	A/A	NA	A/G	G/G	A/G	A/A	A/A	A/G	A/A	A/A	A/A	NA	NA	A/A	A/G	A/A	A/G	A/G	NA	G/G	A/A	A/G	A/A	A/G	NA	A/A	A/G	A/A	A/G	A/A	A/G	A/A	A/A	A/G	G/G	G/G
ST4.03ch01pos64398407.1	1	64398407	NA	NA	NA	G/G	G/G	G/A	G/G	G/A	A/A	G/A	G/G	G/A	G/A	G/A	G/G	G/A	G/A	G/A	G/G	NA	NA	G/A	G/A	NA	G/G	G/A	A/A	G/G	NA	G/A	G/G	G/A	G/G	G/A	G/G	G/A	G/A	G/G	G/A	G/A	G/G	G/G	G/A	A/A	G/A	G/G	G/G
ST4.03ch01pos64417119.1	1	64417119	G/A	NA	G/A	G/G	G/G	G/A	NA	G/A	A/A	G/A	G/G	G/A	G/A	NA	G/G	NA	G/A	G/A	G/G	G/A	NA	NA	G/A	G/A	G/G	G/A	NA	G/G	NA	G/A	G/G	NA	NA	A/A	NA	G/A	G/A	G/G	NA	G/A	G/G	G/G	G/A	A/A	G/A	G/G	G/G
ST4.03ch01pos64510680.1	1	64510680	A/G	NA	A/A	A/G	A/G	A/G	G/G	A/G	A/A	A/A	A/G	A/A	A/G	A/G	G/G	A/G	A/A	A/A	G/G	A/A	NA	A/A	A/G	NA	A/G	A/G	A/A	G/G	A/G	A/G	G/G	A/A	NA	A/G	A/G	A/G	A/A	A/G	A/G	A/G	A/G	A/G	A/A	A/A	NA	G/G	G/G
ST4.03ch01pos64510747.1	1	64510747	A/G	NA	A/A	A/G	A/G	A/G	G/G	A/G	A/A	A/A	A/G	A/A	A/G	A/G	G/G	A/G	A/A	A/A	G/G	A/A	NA	A/A	A/G	NA	A/G	A/G	A/A	G/G	A/G	A/G	G/G	A/A	NA	A/G	A/G	A/G	A/A	A/G	A/G	A/G	A/G	A/G	A/A	A/A	NA	G/G	G/G
ST4.03ch01pos64716547.1	1	64716547	A/A	A/A	A/A	A/A	A/A	A/A	A/G	A/A	A/A	G/G	A/A	G/G	A/G	A/A	A/A	A/G	A/G	A/A	A/A	G/G	A/G	G/G	A/G	A/G	A/G	A/G	A/G	A/G	A/G	A/G	A/A	A/G	NA	A/G	A/G	A/G	A/G	A/A	G/G	A/G	A/G	A/A	A/A	A/A	A/G	A/A	A/A
ST4.03ch01pos64780923.1	1	64780923	A/A	A/A	A/A	A/A	A/A	A/C	A/A	A/C	C/C	A/A	A/A	A/A	A/A	A/C	A/A	A/A	A/A	A/A	A/A	A/A	A/A	A/A	A/A	A/A	A/C	A/A	A/C	A/A	A/A	A/A	A/A	A/A	NA	A/C	A/A	A/A	A/A	A/A	A/A	A/A	A/C	A/A	A/A	A/C	A/A	A/A	A/A
ST4.03ch01pos64780975.1	1	64780975	C/C	C/C	C/C	C/C	C/C	C/G	C/C	C/G	G/G	C/C	C/C	C/C	C/C	C/G	C/C	C/C	C/C	C/C	C/C	C/C	C/C	C/C	C/C	C/C	C/G	C/C	C/G	C/C	C/C	C/C	C/C	C/C	NA	C/G	C/C	C/C	C/C	C/C	C/C	C/C	C/G	C/C	C/C	C/G	C/C	C/C	C/C
ST4.03ch01pos64780979.1	1	64780979	T/T	T/T	T/T	T/T	T/T	T/A	T/T	T/A	A/A	T/T	T/T	T/T	T/T	T/A	T/T	T/T	T/T	T/T	T/T	T/T	T/T	T/T	T/T	T/T	T/A	T/T	T/A	T/T	T/T	T/T	T/T	T/T	NA	T/A	T/T	T/T	T/T	T/T	T/T	T/T	T/A	T/T	T/T	T/A	T/T	T/T	T/T
ST4.03ch01pos64780987.1	1	64780987	C/C	C/C	C/C	C/C	C/C	C/T	C/C	C/T	T/T	C/C	C/C	C/C	C/C	C/T	C/C	C/C	C/C	C/C	C/C	C/C	C/C	C/C	C/C	C/C	C/T	C/C	C/T	C/C	C/C	C/C	C/C	C/C	NA	C/T	C/C	C/C	C/C	C/C	C/C	C/C	C/T	C/C	C/C	C/T	C/C	C/C	C/C
ST4.03ch01pos65069320.1	1	65069320	T/T	T/T	T/T	NA	T/T	C/T	NA	C/T	C/C	C/T	T/T	C/T	C/T	C/T	NA	C/T	C/T	T/T	T/T	C/T	C/T	C/T	C/T	C/T	C/T	C/T	C/C	T/T	C/T	C/T	T/T	C/T	NA	C/T	C/T	C/T	C/T	T/T	C/T	C/T	C/T	T/T	T/T	C/T	C/T	T/T	T/T
ST4.03ch01pos65069321.1	1	65069321	T/T	NA	C/C	NA	T/C	T/T	T/C	T/T	T/T	T/T	C/C	T/T	T/T	T/T	NA	T/T	T/C	C/C	NA	T/T	T/C	NA	T/T	T/T	T/T	NA	T/T	T/C	T/C	T/C	T/C	T/C	T/T	T/T	T/C	T/C	T/C	T/C	T/T	T/T	T/T	T/C	C/C	T/T	T/T	T/C	T/C
ST4.03ch01pos65069376.1	1	65069376	C/C	NA	T/T	T/T	T/C	T/C	T/C	T/C	T/T	T/C	T/T	T/C	T/C	T/C	NA	T/C	T/T	T/T	NA	T/C	T/T	T/C	T/C	T/C	T/C	T/C	T/T	T/C	T/T	T/C	T/C	T/T	NA	T/C	T/T	NA	T/T	T/C	T/C	T/C	T/C	T/C	T/T	T/C	T/C	T/C	T/C
ST4.03ch01pos65069461.1	1	65069461	G/G	NA	A/A	A/A	G/A	G/G	G/A	G/G	G/G	G/G	A/A	G/G	G/G	G/G	G/A	G/G	G/A	A/A	G/A	G/G	G/A	NA	G/G	G/G	G/G	G/A	G/G	G/A	G/A	G/A	G/A	G/A	G/G	G/G	G/A	G/A	G/A	G/A	G/G	G/G	G/G	G/A	A/A	G/G	NA	G/A	G/A
ST4.03ch01pos65069472.1	1	65069472	A/A	NA	T/T	T/T	T/A	T/A	T/A	T/A	T/T	T/A	T/T	NA	T/A	T/A	T/A	T/A	T/T	T/T	T/A	T/A	T/T	T/A	T/A	T/A	T/A	T/A	T/T	T/A	NA	T/A	T/A	T/T	T/A	T/A	T/T	T/A	T/T	T/A	T/A	T/A	T/A	T/A	T/T	T/A	T/A	T/A	T/A
ST4.03ch01pos65268913.1	1	65268913	C/C	T/C	T/T	T/T	T/C	C/C	T/C	C/C	C/C	T/C	T/T	T/C	T/C	C/C	T/C	T/C	T/T	T/T	T/C	T/C	T/T	T/C	T/C	T/C	NA	T/C	T/C	T/C	T/C	T/C	T/C	T/T	T/C	C/C	T/C	T/C	NA	T/C	T/C	T/C	NA	T/C	T/T	C/C	T/C	T/C	T/C
ST4.03ch01pos65268919.1	1	65268919	C/C	T/C	T/T	T/T	T/C	C/C	T/C	C/C	C/C	T/C	T/T	T/C	T/C	C/C	T/C	T/C	T/T	T/T	T/C	T/C	T/T	T/C	T/C	T/C	C/C	T/C	T/C	T/C	T/C	T/C	T/C	T/T	T/C	C/C	T/C	T/C	NA	T/C	T/C	T/C	C/C	T/C	T/T	C/C	T/C	T/C	T/C
ST4.03ch01pos65268963.1	1	65268963	G/G	A/G	A/A	A/A	A/G	G/G	A/G	G/G	G/G	A/G	A/A	A/G	A/G	G/G	A/G	A/G	A/A	A/A	A/G	A/G	A/A	A/G	A/G	A/G	G/G	A/G	A/G	A/G	A/G	A/G	A/G	A/A	A/G	G/G	A/G	A/G	A/G	A/G	A/G	A/G	G/G	A/G	A/A	G/G	A/G	A/G	A/G
ST4.03ch01pos65384864.1	1	65384864	A/A	A/A	A/A	A/A	A/A	A/G	A/G	A/G	G/G	A/G	A/A	A/G	G/G	A/G	A/A	G/G	A/A	A/A	A/A	G/G	A/G	A/G	G/G	G/G	G/G	A/A	G/G	A/G	A/G	A/G	A/A	A/G	A/G	G/G	A/G	A/G	A/G	A/A	G/G	G/G	G/G	A/A	A/A	G/G	A/G	A/A	A/A
ST4.03ch01pos65447568.1	1	65447568	G/G	NA	G/G	G/G	G/G	NA	G/G	G/A	A/A	G/A	G/G	G/A	NA	G/A	G/G	A/A	G/G	G/G	G/G	A/A	NA	G/A	A/A	A/A	A/A	G/G	A/A	NA	G/A	G/A	G/G	G/A	NA	A/A	G/A	G/A	G/A	G/G	NA	A/A	A/A	G/G	G/G	A/A	G/A	G/G	G/G
ST4.03ch01pos65447574.1	1	65447574	A/A	A/A	A/A	A/A	A/A	A/A	A/A	A/A	A/A	A/G	A/A	A/G	NA	A/A	A/A	A/A	A/A	A/A	A/A	A/G	NA	A/G	A/A	A/A	A/G	A/A	A/A	NA	A/A	A/G	A/A	A/A	NA	A/A	A/G	A/A	NA	A/A	NA	A/A	A/G	A/A	A/A	A/A	A/G	A/A	A/A
ST4.03ch01pos65447604.1	1	65447604	C/C	C/C	C/C	C/C	C/C	C/C	C/C	C/C	C/C	C/A	C/C	C/A	NA	C/C	C/C	C/C	C/C	C/C	C/C	C/A	NA	C/A	C/C	C/C	C/A	C/C	C/C	NA	C/C	C/A	C/C	C/C	NA	C/C	C/A	C/C	NA	C/C	NA	C/C	C/A	C/C	C/C	C/C	C/A	C/C	C/C
ST4.03ch01pos65447626.1	1	65447626	A/A	NA	A/A	A/A	A/A	NA	A/A	A/G	G/G	A/A	A/A	A/A	NA	A/G	A/A	G/G	A/A	A/A	A/A	A/G	NA	NA	G/G	G/G	A/A	A/A	G/G	A/A	A/G	A/G	A/A	A/G	A/A	G/G	A/A	A/G	A/G	A/A	NA	G/G	A/A	A/A	A/A	G/G	A/A	A/A	A/A
ST4.03ch01pos65524663.1	1	65524663	C/C	C/C	C/C	C/C	C/C	C/C	C/C	C/C	C/C	C/G	C/C	C/G	C/C	C/C	C/C	C/C	C/C	C/C	C/C	C/G	C/C	C/G	C/C	C/C	C/C	C/C	C/C	C/C	C/C	C/G	C/C	C/C	C/C	C/C	C/G	C/C	C/C	C/C	C/C	C/C	C/C	C/C	C/C	C/C	C/G	C/C	C/C
ST4.03ch01pos65524668.1	1	65524668	T/T	T/T	T/T	T/T	T/T	T/G	T/T	T/G	G/G	T/G	T/T	T/G	T/G	T/G	T/T	T/G	T/T	T/T	T/T	G/G	T/G	T/G	T/G	T/G	T/G	T/T	G/G	T/T	T/G	T/G	T/T	T/G	T/G	T/G	T/G	T/G	T/G	T/T	T/T	T/G	T/G	T/T	T/T	T/G	T/G	T/T	T/T
ST4.03ch01pos65524678.1	1	65524678	A/A	A/A	A/A	A/A	A/A	A/C	A/A	A/C	C/C	A/A	A/A	A/A	A/C	A/C	A/A	A/C	A/A	A/A	A/A	A/C	A/C	A/C	A/C	A/C	A/A	A/A	C/C	A/A	A/C	A/C	A/A	A/C	A/C	A/C	A/A	A/C	A/C	A/A	A/A	A/C	A/A	A/A	A/A	A/C	A/A	A/A	A/A
ST4.03ch01pos65524691.1	1	65524691	G/G	G/G	G/G	G/G	G/G	G/G	G/G	G/G	G/G	G/G	G/G	G/G	G/G	G/G	G/G	G/G	G/G	G/G	G/G	G/G	G/G	G/G	G/G	G/G	G/G	G/G	G/G	G/G	G/G	G/G	G/G	G/G	G/G	G/G	G/G	G/G	G/G	G/G	G/G	G/G	G/G	G/G	G/G	G/G	G/G	G/G	G/G
ST4.03ch01pos65587788.1	1	65587788	T/T	NA	T/A	T/T	T/T	T/T	T/T	T/T	T/T	T/A	T/T	T/A	T/T	T/T	T/T	T/T	T/T	T/A	T/T	T/A	T/T	T/A	T/T	T/T	T/T	T/T	T/T	T/T	T/T	T/A	T/T	T/T	T/T	T/T	T/A	T/T	NA	T/T	T/T	T/T	T/T	T/T	T/A	T/T	T/A	T/T	T/T
ST4.03ch01pos65590157.1	1	65590157	C/C	C/C	C/C	C/C	C/C	NA	C/C	C/C	NA	C/C	C/C	C/C	C/C	C/C	C/C	C/C	C/C	C/C	C/C	C/C	NA	NA	C/C	C/C	C/T	C/C	NA	C/T	C/T	C/C	C/C	NA	NA	T/T	C/C	NA	C/C	C/C	T/T	NA	C/T	C/C	C/C	NA	C/C	C/C	C/C
ST4.03ch01pos65654141.1	1	65654141	G/G	G/T	G/T	G/G	G/G	G/T	G/T	G/T	T/T	G/T	G/G	G/T	G/T	G/T	G/G	G/T	G/G	G/T	G/G	T/T	G/T	G/T	G/T	G/T	G/T	G/G	T/T	G/T	G/T	G/T	G/G	G/T	G/T	T/T	G/T	G/T	G/T	G/G	T/T	G/T	G/T	G/G	G/T	G/T	G/T	G/G	G/G
ST4.03ch01pos65730066.1	1	65730066	T/T	T/T	T/C	T/T	T/T	T/T	T/T	T/T	T/T	T/T	T/T	T/T	T/T	T/T	T/T	T/T	T/T	T/C	T/T	T/T	T/T	T/T	T/T	T/T	T/T	T/T	T/T	T/T	T/T	T/C	T/T	T/T	NA	T/T	T/C	T/T	T/T	T/T	T/T	T/T	T/T	T/T	T/C	T/T	T/T	T/T	T/T
ST4.03ch01pos65735421.1	1	65735421	T/T	NA	T/C	T/T	T/T	T/T	T/T	T/T	T/T	T/T	T/T	T/T	T/T	T/T	T/T	T/T	T/T	T/C	T/T	T/T	T/T	T/T	T/T	T/T	T/T	T/T	T/T	T/T	T/T	T/C	T/T	T/T	NA	T/T	T/C	T/T	NA	T/T	T/T	T/T	T/T	T/T	T/C	T/T	T/T	T/T	T/T
ST4.03ch01pos65741648.1	1	65741648	A/A	NA	A/G	A/A	A/A	A/A	A/A	A/A	A/A	A/A	A/A	A/A	A/A	A/A	A/A	A/A	A/A	A/G	A/A	A/A	A/A	A/A	A/A	A/A	A/A	A/A	A/A	A/A	A/A	A/G	A/A	A/A	A/G	A/A	A/G	A/A	A/A	A/A	A/A	A/A	A/A	A/A	A/G	A/A	A/A	A/A	A/A
ST4.03ch01pos65757322.1	1	65757322	T/T	NA	C/C	C/C	T/C	T/T	T/C	T/T	T/T	T/T	C/C	T/T	T/T	T/T	T/C	T/T	C/C	C/C	T/C	T/T	NA	T/C	NA	T/T	C/C	C/C	T/T	C/C	C/C	T/C	T/C	T/C	C/C	T/C	C/C	T/C	T/C	T/C	C/C	T/T	C/C	T/C	C/C	T/T	T/C	T/C	T/C
ST4.03ch01pos65757358.1	1	65757358	G/G	G/A	G/A	G/G	G/G	G/G	G/G	G/G	G/G	G/G	G/G	G/G	G/G	G/G	G/G	G/G	G/G	G/A	G/G	G/G	G/G	G/G	G/G	G/G	G/G	G/G	G/G	G/G	G/G	G/A	G/G	G/G	G/A	G/G	G/A	G/G	G/A	G/G	G/G	G/G	G/G	G/G	G/A	G/G	G/G	G/G	G/G
ST4.03ch01pos65757395.1	1	65757395	C/C	C/T	T/T	T/T	C/T	C/C	C/T	C/C	C/C	C/C	T/T	C/C	C/C	C/C	C/T	C/C	T/T	T/T	C/T	C/C	C/T	C/C	C/C	C/C	T/T	C/T	C/C	T/T	C/T	C/T	C/T	C/T	T/T	C/T	T/T	C/T	C/T	C/T	T/T	C/C	T/T	C/T	T/T	C/C	C/T	C/T	C/T
ST4.03ch01pos65757414.1	1	65757414	T/T	T/C	C/C	C/C	T/C	T/T	T/C	T/T	T/T	T/T	C/C	T/T	T/T	T/T	T/C	T/T	C/C	C/C	T/C	T/T	T/C	T/T	T/T	T/T	C/C	T/C	T/T	C/C	T/C	T/C	T/C	T/C	C/C	T/C	C/C	T/C	T/C	T/C	C/C	T/T	C/C	T/C	C/C	T/T	T/T	T/C	T/C
ST4.03ch01pos65922456.1	1	65922456	C/C	C/T	T/T	NA	C/C	C/C	C/C	C/C	C/C	C/C	NA	C/C	C/C	C/C	C/C	C/C	NA	T/T	C/C	C/C	C/C	C/C	C/C	C/C	NA	C/C	C/C	NA	C/C	C/T	C/C	C/C	NA	C/C	NA	C/C	C/C	C/C	NA	C/C	NA	C/C	T/T	C/C	C/C	C/C	C/C
ST4.03ch01pos66025433.1	1	66025433	T/T	NA	NA	T/T	T/T	T/T	T/T	T/T	T/T	T/T	T/T	T/T	T/C	T/T	T/T	T/C	T/C	T/C	T/C	T/T	T/T	T/T	T/C	T/C	T/C	T/C	T/T	T/T	T/T	T/C	T/T	T/T	C/C	T/T	T/T	T/T	T/T	T/T	T/C	T/C	T/C	T/T	T/C	T/C	T/T	T/T	T/T
ST4.03ch01pos66025469.1	1	66025469	T/T	NA	NA	T/T	T/T	T/T	T/T	T/T	T/T	T/T	T/T	T/T	T/C	T/T	T/T	T/C	T/C	T/C	T/C	T/T	T/T	T/T	T/C	T/C	T/T	T/C	T/T	T/T	T/T	T/C	T/T	T/T	T/C	T/T	T/T	T/T	T/T	T/T	T/C	T/C	T/T	T/T	T/C	T/C	T/T	T/T	T/T
ST4.03ch01pos66074590.1	1	66074590	G/G	G/A	G/A	G/G	G/G	G/G	G/G	G/G	G/G	G/A	G/G	G/A	G/G	G/G	G/G	G/G	G/A	G/A	G/A	G/A	G/G	G/A	G/G	G/G	G/G	G/G	G/G	G/G	G/G	NA	G/G	G/G	G/A	G/G	G/G	G/G	G/G	G/G	G/A	G/G	G/G	G/G	G/A	G/G	G/A	G/G	G/G
ST4.03ch01pos66074604.1	1	66074604	G/G	G/A	G/A	G/G	G/G	G/G	G/G	G/G	G/G	G/A	G/G	G/A	G/G	G/G	G/G	G/G	G/A	G/A	G/A	G/A	G/G	G/A	G/G	G/G	G/G	G/G	G/G	G/G	G/G	NA	G/G	G/G	G/A	G/G	G/G	G/G	G/G	G/G	G/A	G/G	G/G	G/G	G/A	G/G	G/A	G/G	G/G
ST4.03ch01pos66074737.1	1	66074737	G/G	G/G	G/G	G/G	G/G	G/G	G/G	G/G	G/G	G/A	G/G	G/A	G/G	G/G	G/G	G/G	G/G	G/G	G/G	G/G	G/G	G/A	G/G	G/G	G/G	G/G	G/G	G/G	NA	G/A	G/G	G/G	G/A	G/G	G/A	G/G	G/A	G/G	G/G	G/G	G/G	G/G	G/G	G/G	G/A	G/G	G/G
ST4.03ch01pos66074746.1	1	66074746	C/C	C/T	C/T	C/C	C/C	C/C	C/C	C/C	C/C	C/T	C/C	C/T	C/C	C/C	C/C	C/C	C/T	C/T	C/T	C/T	C/C	C/T	C/C	C/C	C/C	C/T	C/C	C/C	C/C	C/T	C/C	C/C	C/T	C/C	C/C	C/T	C/C	C/C	C/T	C/C	C/C	C/C	C/T	C/C	C/T	C/C	C/C
ST4.03ch01pos66074755.1	1	66074755	T/T	T/T	T/T	T/T	T/T	T/T	T/T	T/T	T/T	T/C	T/T	T/C	T/T	T/T	T/T	T/T	T/T	T/T	T/T	T/T	T/T	T/C	T/T	T/T	T/T	T/T	T/T	T/T	NA	T/C	T/T	T/T	T/C	T/T	T/C	T/T	T/C	T/T	T/T	T/T	T/T	T/T	T/T	T/T	T/C	T/T	T/T
ST4.03ch01pos66074792.1	1	66074792	T/T	T/C	T/C	T/T	T/T	T/T	T/T	T/T	T/T	C/C	T/T	C/C	T/T	T/T	T/T	T/T	T/C	T/C	T/C	T/C	T/T	T/C	T/T	T/T	T/T	T/C	T/T	T/T	T/C	T/C	T/T	T/T	T/C	T/T	T/C	T/C	T/C	T/T	T/C	T/T	T/T	T/T	T/C	T/T	T/C	T/T	T/T
ST4.03ch01pos66074809.1	1	66074809	A/A	A/T	A/T	A/A	A/A	A/A	A/A	A/A	A/A	T/T	A/A	T/T	A/A	A/A	A/A	A/A	A/T	A/T	A/T	A/T	A/A	A/T	A/A	A/A	A/A	A/T	A/A	A/A	A/T	A/T	A/A	A/A	A/T	A/A	A/T	A/T	A/T	A/A	A/T	A/A	A/A	A/A	A/T	A/A	A/T	A/A	A/A
ST4.03ch01pos66074811.1	1	66074811	T/T	C/C	C/C	T/T	T/T	T/T	NA	T/T	NA	C/C	NA	C/C	T/T	T/T	T/T	T/T	C/C	C/C	C/C	C/C	NA	C/C	T/T	NA	T/T	C/C	T/T	NA	NA	C/C	T/T	NA	C/C	T/T	NA	T/C	T/C	T/T	C/C	NA	T/T	T/C	C/C	T/T	C/C	T/T	T/T
ST4.03ch01pos66128418.1	1	66128418	C/C	G/C	G/C	C/C	C/C	G/C	NA	G/C	G/G	G/C	C/C	NA	G/G	G/C	NA	G/G	G/G	G/C	G/C	G/G	NA	G/C	NA	G/G	G/G	G/C	G/G	G/C	G/C	G/C	C/C	NA	NA	G/G	G/C	G/C	G/C	C/C	G/G	G/G	G/G	C/C	G/C	G/G	G/C	C/C	C/C
ST4.03ch01pos66230654.1	1	66230654	A/A	G/A	G/A	A/A	A/A	G/A	G/A	G/A	G/G	G/A	A/A	G/A	G/A	G/A	A/A	G/A	G/G	G/A	G/A	G/G	A/A	G/A	G/A	G/A	G/G	G/A	G/G	G/A	G/A	G/A	A/A	A/A	G/A	G/G	G/A	G/A	A/A	A/A	G/G	G/A	G/G	A/A	G/A	G/A	G/A	A/A	A/A
ST4.03ch01pos66243009.1	1	66243009	G/G	G/G	G/G	NA	G/G	G/G	G/G	G/G	G/G	G/A	NA	G/A	G/A	G/G	NA	G/A	G/G	G/G	G/G	G/G	G/G	G/A	G/A	G/A	G/G	G/G	G/G	G/G	G/G	G/A	G/G	G/G	G/A	G/G	A/A	G/G	G/A	G/G	G/G	G/A	G/G	G/G	G/G	G/A	G/A	NA	G/G
ST4.03ch01pos66348058.1	1	66348058	G/G	G/G	G/G	G/G	G/G	T/G	T/G	T/G	T/T	G/G	G/G	G/G	T/G	T/G	G/G	T/G	G/G	G/G	G/G	T/G	G/G	G/G	T/G	T/G	T/G	G/G	T/T	T/G	T/G	G/G	G/G	G/G	G/G	T/T	G/G	T/G	G/G	G/G	T/G	T/G	T/G	G/G	G/G	T/G	G/G	G/G	G/G
ST4.03ch01pos66576047.1	1	66576047	G/G	G/A	G/A	G/A	G/A	G/G	G/G	G/G	G/G	G/A	G/A	G/A	G/A	G/G	G/G	G/A	G/G	G/A	G/G	G/A	G/A	G/A	G/A	G/A	G/A	G/A	G/G	G/G	G/A	G/A	G/G	G/A	G/A	G/G	G/G	G/A	G/A	G/A	G/A	G/A	G/A	G/A	G/A	G/A	G/A	G/G	G/G
ST4.03ch01pos66665934.1	1	66665934	C/C	C/T	T/T	C/C	C/C	C/C	C/C	C/C	C/C	C/T	C/C	C/T	C/C	C/C	C/C	C/C	C/T	T/T	C/T	C/T	C/C	C/T	C/C	C/C	C/T	C/T	C/C	C/C	C/C	C/T	C/C	C/C	C/T	C/C	C/T	C/C	NA	C/C	C/C	C/C	C/T	C/C	T/T	C/C	C/T	C/C	C/C
ST4.03ch01pos66665938.1	1	66665938	C/C	C/T	T/T	C/C	C/C	C/C	C/C	C/C	C/C	C/T	C/C	C/T	C/C	C/C	C/C	C/C	C/T	T/T	C/T	C/T	C/C	C/T	C/C	C/C	C/T	C/T	C/C	C/C	C/C	C/T	C/C	C/C	C/T	C/C	C/T	C/C	NA	C/C	C/C	C/C	C/T	C/C	T/T	C/C	C/T	C/C	C/C
ST4.03ch01pos66845586.1	1	66845586	C/C	C/T	NA	C/C	C/C	C/C	C/C	C/C	C/C	NA	C/C	NA	C/C	C/C	C/C	C/C	C/C	C/T	C/C	C/T	NA	NA	NA	C/C	C/C	C/C	C/C	C/C	C/C	C/T	C/C	C/C	NA	C/C	C/T	C/C	C/T	C/C	C/C	C/C	C/C	C/C	C/T	C/C	C/T	C/C	C/C
ST4.03ch01pos66845588.1	1	66845588	G/G	G/A	NA	G/G	G/G	G/G	G/G	G/G	G/G	NA	G/G	NA	G/G	G/G	G/G	G/G	G/G	G/A	NA	G/A	NA	NA	NA	G/G	G/G	G/G	G/G	G/G	G/G	G/A	G/G	G/G	NA	G/G	G/A	G/G	G/A	G/G	G/G	G/G	G/G	G/G	G/A	G/G	G/A	G/G	G/G
ST4.03ch01pos66881583.1	1	66881583	G/C	G/C	G/C	G/C	G/C	G/C	G/C	G/C	G/C	G/C	G/C	G/C	G/C	G/C	G/C	G/C	G/C	G/C	G/C	G/C	G/C	G/C	G/C	G/C	G/C	G/C	G/C	G/C	G/C	G/C	G/C	G/C	G/C	G/C	G/C	G/C	G/C	G/C	G/C	G/C	G/C	G/C	G/C	G/G	G/C	G/C	G/C
ST4.03ch01pos66881602.1	1	66881602	G/A	G/A	G/A	G/A	G/A	G/A	G/A	G/A	G/A	G/A	G/A	G/A	G/A	G/A	G/A	G/A	G/A	G/A	G/A	G/A	G/A	G/A	G/A	G/A	G/A	G/A	G/A	G/A	G/A	G/A	G/A	G/A	G/A	G/A	G/A	G/A	G/A	G/A	G/A	G/A	G/A	G/A	G/A	G/G	G/A	G/A	G/A
ST4.03ch01pos66944440.1	1	66944440	C/T	NA	C/T	T/T	C/T	C/T	T/T	C/T	T/T	C/C	T/T	C/C	C/T	C/T	T/T	C/T	T/T	C/T	T/T	C/T	NA	NA	C/T	C/T	C/T	C/T	T/T	T/T	C/T	C/T	C/T	C/T	NA	C/T	C/T	C/T	C/T	C/T	NA	C/T	C/T	C/T	C/T	C/C	NA	T/T	C/T
ST4.03ch01pos67071603.1	1	67071603	G/A	G/A	A/A	G/G	G/A	G/A	G/A	G/A	G/G	G/A	G/G	G/A	G/G	G/A	G/G	G/G	G/G	A/A	G/G	G/G	G/A	G/A	G/G	G/G	G/A	G/A	G/G	G/G	G/A	G/A	G/A	G/A	G/A	G/G	G/A	G/A	G/A	G/A	G/A	G/G	G/A	G/A	A/A	G/G	G/A	G/G	G/A
ST4.03ch01pos67089403.1	1	67089403	C/T	NA	T/T	C/C	C/T	C/T	NA	C/T	C/C	C/T	C/C	C/T	C/C	C/T	C/C	C/C	C/C	T/T	C/C	C/C	C/T	C/T	C/C	C/C	C/T	C/T	C/C	C/C	C/T	C/T	C/T	C/T	NA	C/C	C/T	C/T	C/T	C/T	C/T	C/C	C/T	C/T	T/T	C/C	C/T	C/C	C/T
ST4.03ch01pos67137108.1	1	67137108	T/T	NA	NA	C/T	C/T	C/C	C/T	C/C	C/C	T/T	C/T	T/T	C/C	C/C	C/T	C/C	T/T	NA	T/T	C/T	NA	NA	C/C	C/C	T/T	T/T	C/C	C/T	C/T	NA	C/C	T/T	NA	C/C	C/C	C/T	T/T	T/T	T/T	C/C	T/T	T/T	NA	C/T	C/T	C/T	C/C
ST4.03ch01pos67305312.1	1	67305312	G/A	G/A	G/G	G/A	G/A	NA	G/A	G/A	G/G	G/A	G/A	G/A	G/G	G/A	G/A	G/G	G/A	G/G	G/A	G/G	NA	NA	G/G	G/G	G/A	G/A	G/G	G/A	G/A	G/A	G/A	G/A	G/A	G/G	G/G	G/A	G/A	G/A	G/A	G/G	G/A	G/A	G/G	G/A	G/A	G/A	G/A
ST4.03ch01pos67370704.1	1	67370704	C/C	C/C	C/C	C/C	C/C	C/C	C/C	C/C	C/C	C/C	C/C	C/C	C/T	C/C	C/C	C/C	C/C	C/C	C/C	C/C	C/C	C/C	C/T	C/T	C/T	C/C	C/C	C/C	C/C	C/C	C/C	C/C	C/C	C/C	C/C	C/C	C/C	C/C	C/C	C/C	C/T	C/C	C/C	C/C	C/C	C/C	C/C
ST4.03ch01pos67370728.1	1	67370728	G/C	G/C	G/C	G/C	G/C	G/C	G/C	G/C	G/C	G/C	G/C	G/C	G/C	G/C	G/C	G/C	G/C	G/C	G/C	G/C	G/G	G/C	NA	G/C	NA	G/C	G/C	G/C	G/C	G/C	G/C	NA	NA	G/C	G/C	G/C	G/C	G/C	G/C	G/C	G/C	G/C	G/C	G/C	G/C	G/C	G/C
ST4.03ch01pos67370738.1	1	67370738	G/G	G/G	G/G	G/G	G/G	G/G	G/G	G/G	G/G	G/G	G/G	G/G	G/A	G/G	G/G	G/G	G/G	G/G	G/G	G/G	G/G	G/G	G/A	G/A	G/A	G/G	G/G	G/G	G/G	G/G	G/G	G/G	G/G	G/G	G/G	G/G	G/G	G/G	G/G	G/G	G/A	G/G	G/G	G/G	G/G	G/G	G/G
ST4.03ch01pos67560761.1	1	67560761	A/A	NA	A/G	A/G	A/G	A/A	A/A	A/A	A/A	A/A	A/G	A/A	A/A	A/A	A/A	A/A	A/A	A/G	A/A	A/A	A/G	A/A	NA	A/A	A/G	A/A	A/A	A/A	A/G	A/G	A/A	A/G	NA	A/A	A/A	A/G	A/G	A/G	A/A	A/A	A/G	A/G	A/G	A/A	A/A	A/A	A/A
ST4.03ch01pos67560774.1	1	67560774	G/G	NA	G/A	G/A	G/A	G/G	G/G	G/G	G/G	G/G	G/A	G/G	G/G	G/G	G/G	G/G	G/G	G/A	G/G	G/G	G/A	G/G	NA	G/G	G/A	G/G	G/G	G/G	G/A	G/A	G/G	G/A	NA	G/G	G/G	G/A	G/A	G/A	G/G	G/G	G/A	G/A	G/A	G/G	G/G	G/G	G/G
ST4.03ch01pos67566391.1	1	67566391	T/T	T/C	T/C	T/C	T/C	T/T	T/T	T/T	T/T	T/T	T/C	T/T	T/T	T/T	T/T	T/T	T/T	T/C	T/T	T/T	NA	NA	T/T	T/T	T/T	T/T	T/T	T/T	NA	T/C	T/T	NA	T/C	T/T	T/T	T/C	T/C	T/C	T/T	T/T	T/T	T/C	T/C	T/T	T/T	T/T	T/T
ST4.03ch01pos67646677.1	1	67646677	A/A	A/G	A/G	A/A	A/A	A/A	A/A	A/A	A/A	A/A	A/A	A/A	A/A	A/A	A/A	A/A	A/A	A/G	A/A	A/A	A/A	A/A	A/A	A/A	A/A	A/A	A/A	A/A	A/A	A/G	A/A	A/A	A/G	A/A	A/G	A/A	A/A	A/A	A/A	A/A	A/A	A/A	A/G	A/A	A/A	A/A	A/A
ST4.03ch01pos67646702.1	1	67646702	C/C	C/T	C/T	C/C	C/C	C/C	C/C	C/C	C/C	C/C	C/C	C/C	C/C	C/C	C/C	C/C	C/C	C/T	C/C	C/C	C/C	C/C	C/C	C/C	C/C	C/C	C/C	C/C	C/C	C/T	C/C	C/C	C/T	C/C	C/T	C/C	C/C	C/C	C/T	C/C	C/C	C/C	C/T	C/C	C/C	C/C	C/C
ST4.03ch01pos67710807.1	1	67710807	NA	C/T	C/T	C/C	C/T	T/T	C/T	T/T	T/T	T/T	C/C	T/T	T/T	T/T	NA	T/T	C/C	C/T	C/C	C/T	NA	NA	T/T	NA	C/C	C/T	T/T	C/T	NA	C/T	C/T	C/T	NA	C/T	T/T	C/T	C/T	C/T	C/T	T/T	C/C	C/T	C/T	C/T	T/T	C/T	T/T
ST4.03ch01pos67803794.1	1	67803794	A/T	A/T	A/T	A/A	A/T	T/T	A/T	T/T	T/T	T/T	A/A	T/T	A/T	T/T	A/T	A/T	A/A	NA	A/A	A/T	NA	NA	A/T	A/T	A/A	NA	T/T	A/T	A/T	A/T	A/T	A/T	A/T	A/T	T/T	A/T	A/T	A/T	NA	A/T	A/A	A/T	A/T	A/A	T/T	A/T	T/T
ST4.03ch01pos67863707.1	1	67863707	A/C	NA	C/C	A/C	NA	NA	A/C	C/C	C/C	C/C	A/C	C/C	C/C	C/C	NA	C/C	A/C	C/C	A/C	A/C	C/C	C/C	NA	C/C	A/A	A/C	C/C	A/C	NA	A/C	A/C	C/C	NA	A/C	C/C	A/C	NA	C/C	A/C	C/C	A/A	C/C	C/C	A/C	C/C	A/C	C/C
ST4.03ch01pos67863749.1	1	67863749	G/A	NA	A/A	NA	A/A	A/A	G/A	A/A	A/A	A/A	G/A	A/A	A/A	A/A	NA	A/A	G/A	A/A	G/A	G/A	NA	NA	A/A	A/A	G/G	NA	A/A	G/A	G/A	G/A	G/A	A/A	NA	G/A	A/A	NA	A/A	A/A	G/A	A/A	G/G	A/A	A/A	G/A	NA	G/A	A/A
ST4.03ch01pos67863786.1	1	67863786	A/G	NA	G/G	NA	G/G	G/G	A/G	G/G	G/G	G/G	A/G	G/G	G/G	G/G	NA	G/G	A/G	G/G	A/G	A/G	NA	NA	G/G	G/G	A/A	NA	G/G	A/G	A/G	A/G	A/G	G/G	NA	A/G	G/G	NA	G/G	G/G	A/G	G/G	A/A	G/G	G/G	A/G	NA	A/G	G/G
ST4.03ch01pos67863795.1	1	67863795	G/A	NA	A/A	NA	A/A	A/A	G/A	A/A	A/A	A/A	G/A	A/A	A/A	A/A	NA	A/A	G/A	A/A	G/A	G/A	NA	NA	A/A	A/A	G/G	NA	A/A	G/A	G/A	G/A	G/A	A/A	NA	G/A	A/A	NA	A/A	A/A	G/A	A/A	G/G	A/A	A/A	G/A	NA	G/A	A/A
ST4.03ch01pos67863803.1	1	67863803	C/G	NA	G/G	NA	G/G	G/G	C/G	G/G	G/G	G/G	C/G	G/G	G/G	G/G	NA	G/G	C/G	G/G	C/G	C/G	NA	NA	G/G	G/G	C/C	NA	G/G	C/G	C/G	C/G	C/G	G/G	NA	C/G	G/G	NA	G/G	G/G	C/G	G/G	C/C	G/G	G/G	C/G	NA	C/G	G/G
ST4.03ch01pos67863813.1	1	67863813	T/C	NA	C/C	NA	C/C	C/C	T/C	C/C	C/C	C/C	T/C	C/C	C/C	C/C	NA	C/C	T/C	C/C	T/C	T/C	NA	NA	C/C	C/C	T/T	NA	C/C	T/C	T/C	T/C	T/C	C/C	NA	T/C	C/C	NA	C/C	C/C	T/C	C/C	T/T	C/C	C/C	T/C	NA	T/C	C/C
ST4.03ch01pos68451094.1	1	68451094	T/T	NA	T/T	T/G	T/G	T/G	T/G	T/G	G/G	T/T	T/G	T/T	T/G	T/G	T/G	T/G	T/G	T/T	T/T	G/G	T/G	NA	T/G	T/G	T/G	T/G	G/G	G/G	T/G	T/G	T/T	T/G	T/G	T/G	G/G	T/G	T/G	T/G	T/G	T/G	T/G	T/G	T/T	T/T	T/T	T/G	T/G
ST4.03ch01pos68451106.1	1	68451106	G/G	G/G	G/G	G/T	G/T	G/G	G/G	G/G	G/G	G/G	G/T	G/G	G/G	G/G	G/G	G/G	G/G	G/G	G/G	G/T	G/T	NA	G/G	G/G	G/T	G/G	G/G	G/T	G/T	G/T	G/G	G/T	G/G	G/G	G/G	G/T	G/T	G/T	G/T	G/G	G/T	G/T	G/G	G/G	G/G	G/G	G/G
ST4.03ch01pos68525099.1	1	68525099	C/C	C/C	C/C	C/A	C/A	C/C	C/C	C/C	C/C	C/C	C/A	C/C	C/C	C/C	C/C	C/C	C/A	C/C	C/C	C/C	C/A	NA	C/C	C/C	C/C	C/A	C/C	C/C	C/A	C/A	C/C	C/A	C/A	C/C	C/C	C/A	C/A	C/A	C/C	C/C	C/C	C/A	C/C	C/C	C/C	C/C	C/C
ST4.03ch01pos68541973.1	1	68541973	G/G	G/A	G/A	G/A	G/A	G/G	G/G	G/G	G/G	G/G	G/A	G/G	G/G	G/G	G/G	G/G	G/G	G/A	G/G	G/G	G/A	G/A	G/G	G/G	G/G	G/G	G/G	G/G	G/A	G/A	G/G	G/A	G/A	G/G	G/G	G/A	G/A	G/A	G/G	G/G	G/G	G/A	G/A	G/G	G/G	G/G	G/G
ST4.03ch01pos68543779.1	1	68543779	T/T	NA	T/A	T/A	T/A	T/T	T/T	T/T	T/T	T/T	T/A	T/T	T/T	T/T	T/T	T/T	T/A	T/A	T/T	T/T	NA	NA	T/T	T/T	T/A	T/A	T/T	T/A	T/A	T/A	T/T	T/A	NA	T/T	T/A	T/A	T/A	T/A	NA	T/T	T/A	T/A	T/A	T/T	T/T	T/T	T/T
ST4.03ch01pos68650881.1	1	68650881	G/G	G/A	A/A	G/G	G/G	G/A	G/A	G/A	A/A	G/G	G/G	G/G	A/A	G/A	G/G	A/A	G/G	A/A	G/G	A/A	G/G	G/G	A/A	A/A	G/A	NA	A/A	G/A	G/A	G/A	G/G	G/G	G/A	G/A	G/A	G/A	G/A	G/G	A/A	A/A	G/A	G/G	A/A	G/A	G/G	G/G	G/G
ST4.03ch01pos68650932.1	1	68650932	A/A	A/T	T/T	A/A	A/A	A/T	A/T	A/T	T/T	A/A	A/A	A/A	T/T	A/T	A/A	T/T	A/A	T/T	A/A	T/T	A/A	A/A	T/T	T/T	A/A	NA	T/T	A/A	A/A	A/T	A/A	A/A	A/A	A/T	A/A	A/T	A/A	A/A	A/A	T/T	A/A	A/A	T/T	A/T	A/A	A/A	A/A
ST4.03ch01pos68651551.1	1	68651551	C/C	C/C	C/C	C/C	C/C	C/C	C/C	C/C	C/C	C/C	C/C	C/C	C/C	C/C	C/C	C/C	C/C	C/C	C/C	C/C	C/C	C/C	C/C	C/C	C/G	C/C	C/C	C/G	C/G	NA	C/C	C/C	C/C	C/C	C/C	C/G	C/C	C/C	G/G	C/C	C/G	C/C	C/C	C/C	C/C	C/C	C/C
ST4.03ch01pos68651581.1	1	68651581	G/G	G/T	T/T	G/G	G/G	G/T	G/G	G/T	T/T	G/G	G/G	G/G	T/T	G/T	G/G	T/T	G/G	T/T	G/G	T/T	G/G	G/G	NA	T/T	G/T	NA	T/T	G/T	G/T	G/T	G/G	G/G	G/G	G/T	G/G	G/T	G/G	G/G	T/T	T/T	G/T	G/G	T/T	G/T	G/G	G/G	G/G
ST4.03ch01pos68651586.1	1	68651586	T/T	T/C	C/C	T/C	T/C	T/C	T/T	T/C	C/C	T/T	T/C	T/T	C/C	T/C	T/T	C/C	T/C	C/C	T/T	C/C	T/C	T/C	NA	C/C	T/C	T/C	C/C	T/C	T/C	T/C	T/T	T/C	T/C	T/C	T/C	T/C	T/C	T/C	C/C	C/C	T/C	T/C	C/C	T/C	T/T	T/T	T/T
ST4.03ch01pos68919672.1	1	68919672	G/A	NA	A/A	G/A	G/A	G/A	G/A	G/A	A/A	G/A	NA	G/A	A/A	NA	G/A	A/A	G/A	A/A	G/A	A/A	NA	G/A	NA	A/A	G/A	NA	A/A	G/A	G/A	G/A	G/A	G/A	NA	G/A	G/A	G/A	NA	G/A	G/G	A/A	G/A	G/A	A/A	G/A	G/A	G/A	G/A
ST4.03ch01pos68919674.1	1	68919674	G/C	NA	G/C	G/C	G/C	NA	G/C	G/C	G/G	G/C	NA	G/C	G/G	G/C	G/C	G/G	G/C	G/C	G/C	NA	NA	G/C	NA	G/G	G/C	NA	G/G	G/C	G/C	G/C	G/C	G/C	NA	G/G	G/C	G/C	NA	G/C	G/G	G/G	G/C	G/C	G/C	G/G	G/C	G/C	G/C
ST4.03ch01pos68919686.1	1	68919686	NA	NA	A/A	A/A	A/T	NA	NA	A/T	A/A	A/T	A/A	A/T	A/A	A/T	A/T	A/A	A/T	A/A	A/T	A/A	NA	A/T	NA	A/A	A/A	NA	A/A	A/T	A/T	NA	A/T	A/A	NA	A/A	A/T	A/T	A/T	A/T	A/A	A/A	A/A	A/T	A/A	A/A	A/T	A/T	A/T
ST4.03ch01pos68919697.1	1	68919697	G/G	NA	G/T	G/G	G/G	G/T	NA	NA	T/T	G/G	G/G	G/G	T/T	G/T	G/G	T/T	G/G	G/T	G/G	NA	NA	G/G	NA	T/T	G/G	G/G	T/T	G/G	G/G	NA	G/G	G/G	G/G	G/T	G/G	NA	G/G	G/G	G/G	T/T	G/G	G/G	G/T	G/T	G/G	G/G	G/G
ST4.03ch01pos69122995.1	1	69122995	T/T	T/T	T/T	T/T	T/T	T/C	T/T	T/C	C/C	T/T	T/T	T/T	C/C	T/C	T/T	C/C	T/T	T/T	T/T	T/C	T/T	T/T	C/C	C/C	T/C	T/T	C/C	T/T	NA	T/C	T/T	T/T	T/T	T/C	T/T	T/C	NA	T/T	T/T	C/C	T/C	T/T	T/T	T/C	T/T	T/T	T/T
ST4.03ch01pos69123046.1	1	69123046	G/G	G/G	G/G	G/G	G/G	G/A	G/G	G/A	A/A	G/G	G/G	G/G	A/A	G/A	G/G	A/A	G/G	G/G	G/G	G/A	G/G	G/G	A/A	A/A	G/A	G/G	A/A	G/G	NA	G/A	G/G	G/G	G/G	G/A	G/G	G/A	NA	G/G	G/G	A/A	G/A	G/G	G/G	G/A	G/G	G/G	G/G
ST4.03ch01pos69363417.1	1	69363417	C/C	C/C	C/C	C/C	C/C	C/C	C/C	C/C	C/C	C/C	C/C	C/C	C/C	C/C	NA	C/C	C/C	C/C	C/C	C/C	NA	C/C	C/C	C/C	C/G	C/C	C/C	C/C	C/C	NA	C/C	C/C	C/G	C/C	C/C	C/C	C/C	C/C	C/C	C/C	C/G	C/C	C/C	C/C	C/C	C/C	C/C
ST4.03ch01pos69363453.1	1	69363453	A/A	A/A	A/A	A/A	A/A	A/A	A/A	A/A	A/A	A/A	A/A	A/A	A/A	A/A	NA	A/A	A/A	A/A	A/A	A/A	NA	A/A	A/A	A/A	A/G	A/A	A/A	A/A	A/A	NA	A/A	A/A	A/G	A/A	A/A	A/A	A/A	A/A	A/A	A/A	A/G	A/A	A/A	A/A	A/A	A/A	A/A
ST4.03ch01pos69388826.1	1	69388826	NA	NA	T/T	G/G	T/G	T/T	T/G	T/T	T/T	T/T	G/G	T/T	T/T	T/T	NA	NA	T/G	T/T	T/G	T/T	NA	NA	T/T	T/T	T/G	T/G	NA	T/G	T/G	T/G	T/G	T/G	NA	T/G	T/T	T/G	T/G	T/G	T/G	T/T	T/G	NA	T/T	T/G	T/G	T/G	T/T
ST4.03ch01pos69388868.1	1	69388868	NA	NA	T/T	C/C	T/C	T/T	T/C	T/T	T/T	T/T	C/C	T/T	T/T	T/T	NA	NA	T/C	T/T	T/C	T/T	NA	NA	T/T	T/T	T/C	T/C	NA	T/C	T/C	T/C	T/C	T/C	NA	T/C	T/T	T/C	T/C	T/C	T/C	T/T	T/C	NA	T/T	T/C	T/C	T/C	T/T
ST4.03ch01pos69389656.1	1	69389656	A/A	A/A	A/A	A/A	A/A	A/A	A/A	A/A	A/A	A/A	A/A	A/A	A/A	A/A	A/A	A/A	A/A	A/A	A/A	A/A	A/A	A/A	A/A	A/A	A/A	A/A	A/A	A/A	A/A	A/A	A/A	A/A	A/A	A/A	A/A	A/A	A/A	A/A	A/A	A/A	A/A	A/A	A/A	A/A	A/A	A/A	A/A
ST4.03ch01pos69389662.1	1	69389662	T/T	T/T	T/T	T/T	T/T	T/T	T/T	T/T	T/T	T/T	T/T	T/T	T/T	T/T	T/T	T/T	T/T	T/T	T/T	T/T	T/T	T/T	T/T	T/T	T/A	T/T	T/T	T/T	T/T	T/T	T/T	T/T	T/A	T/T	T/T	T/T	T/T	T/T	T/T	T/T	T/A	T/T	T/T	T/T	T/T	T/T	T/T
ST4.03ch01pos69904908.1	1	69904908	G/G	NA	G/A	G/A	NA	G/G	G/A	G/G	G/G	G/A	G/A	G/A	G/G	G/G	G/A	G/G	G/A	G/A	G/A	G/A	G/G	G/A	G/G	G/G	G/G	G/A	G/G	G/G	G/G	G/A	G/A	G/G	G/G	G/A	G/G	G/G	G/G	G/G	G/A	G/G	G/G	G/G	G/A	A/A	G/A	G/A	G/G
ST4.03ch01pos69904925.1	1	69904925	A/A	NA	A/G	A/G	A/G	A/A	A/G	A/A	A/A	A/G	A/G	A/G	A/A	A/A	A/G	A/A	A/G	A/G	A/G	A/G	A/A	A/G	A/A	A/A	A/A	A/G	A/A	A/A	A/A	A/G	A/G	A/A	A/A	A/G	A/A	A/A	A/A	A/A	A/G	A/A	A/A	A/A	A/G	G/G	A/G	A/G	A/A
ST4.03ch01pos69904928.1	1	69904928	T/T	NA	T/A	T/A	T/A	T/T	T/A	T/T	T/T	T/A	T/A	T/A	T/T	T/T	T/A	T/T	T/A	T/A	T/A	T/A	T/T	T/A	T/T	T/T	T/T	T/A	T/T	T/T	T/T	NA	T/A	T/T	T/T	T/A	T/T	T/T	T/T	T/T	T/A	T/T	T/T	T/T	T/A	A/A	T/A	T/A	T/T
ST4.03ch01pos69904930.1	1	69904930	T/T	NA	T/G	T/G	T/G	T/T	T/G	T/T	T/T	T/G	T/G	T/G	T/T	T/T	T/G	T/T	T/G	T/G	T/G	T/G	T/T	T/G	T/T	T/T	T/T	T/G	T/T	T/T	T/T	NA	T/G	T/T	T/T	T/G	T/T	T/T	T/T	T/T	T/G	T/T	T/T	T/T	T/G	G/G	T/G	T/G	T/T
ST4.03ch01pos69904938.1	1	69904938	T/T	NA	T/C	T/C	T/C	T/T	T/C	T/T	T/T	T/C	T/C	T/C	T/T	T/T	T/C	T/T	T/C	T/C	T/C	T/C	T/T	T/C	T/T	T/T	T/T	T/C	T/T	T/T	T/T	T/C	T/C	T/T	T/T	T/C	T/T	T/T	T/T	T/T	T/C	T/T	T/T	T/T	T/C	C/C	T/C	T/C	T/T
ST4.03ch01pos70047988.1	1	70047988	A/A	NA	G/G	G/G	G/A	A/A	G/G	G/A	A/A	G/A	G/G	G/A	G/A	A/A	G/G	G/A	G/G	G/G	G/G	G/A	G/A	G/A	G/A	NA	G/A	G/A	A/A	G/A	G/A	G/A	G/A	G/A	G/A	G/A	G/G	G/A	G/A	G/A	G/A	G/A	G/A	G/A	G/G	G/G	G/A	G/G	G/A
ST4.03ch01pos70050927.1	1	70050927	A/A	A/G	A/A	A/G	A/G	A/A	A/A	A/A	A/A	A/A	A/G	A/A	A/A	A/A	A/A	A/A	A/A	A/A	A/A	A/A	A/G	A/G	A/A	A/A	A/A	NA	A/A	A/A	A/G	A/G	A/A	A/G	A/A	A/A	A/A	A/G	A/G	A/G	A/A	A/A	A/A	A/G	A/A	A/A	A/A	A/A	A/A
ST4.03ch01pos70052490.1	1	70052490	C/C	T/C	T/T	T/T	T/C	C/C	T/T	T/C	C/C	T/C	T/T	T/C	T/C	C/C	T/T	T/C	T/T	T/T	T/T	T/C	T/C	T/C	T/C	T/C	T/C	T/C	C/C	T/C	T/C	T/C	T/C	T/C	T/C	T/C	T/T	T/C	T/C	T/C	T/C	T/C	T/C	T/C	T/T	T/T	T/C	T/T	T/C
ST4.03ch01pos70052491.1	1	70052491	A/A	G/A	G/G	G/G	G/A	A/A	G/G	G/A	A/A	G/A	G/G	G/A	G/A	A/A	G/G	G/A	G/G	G/G	G/G	G/A	NA	G/A	G/A	G/A	G/A	G/A	A/A	G/A	G/A	G/A	G/A	G/A	G/A	G/A	G/G	G/A	G/A	G/A	G/A	G/A	G/A	G/A	G/G	G/G	G/A	G/G	G/A
ST4.03ch01pos70052514.1	1	70052514	A/A	G/A	G/G	G/G	G/A	A/A	G/G	G/A	A/A	G/A	G/G	G/A	G/A	A/A	G/G	G/A	G/G	G/G	G/G	G/A	NA	G/A	G/A	G/A	G/A	G/A	A/A	G/A	G/A	G/A	G/A	G/A	G/A	G/A	G/G	G/A	G/A	G/A	G/A	G/A	G/A	G/A	G/G	G/G	G/A	G/G	G/A
ST4.03ch01pos70052692.1	1	70052692	T/T	C/T	C/C	C/C	C/T	T/T	C/C	C/T	T/T	C/T	C/C	C/T	C/T	T/T	C/C	C/T	C/C	C/C	C/C	C/T	C/T	C/T	C/T	C/T	C/T	C/T	T/T	C/T	C/T	C/T	C/T	C/T	C/T	C/T	C/C	C/T	C/T	C/T	C/T	C/T	C/T	C/T	C/C	C/C	C/T	C/C	C/T
ST4.03ch01pos70052708.1	1	70052708	T/T	A/T	A/A	A/A	A/T	T/T	A/A	A/T	T/T	A/T	A/A	A/T	A/T	T/T	A/A	A/T	A/A	A/A	A/A	A/T	A/T	A/T	A/T	A/T	A/T	A/T	T/T	A/T	A/T	A/T	A/T	A/T	A/T	A/T	A/A	A/T	A/T	A/T	A/T	A/T	A/T	A/T	A/A	A/A	A/T	A/A	A/T
ST4.03ch01pos70171181.1	1	70171181	T/C	NA	T/T	T/T	NA	T/C	T/C	T/T	C/C	T/T	T/T	T/T	C/C	T/C	NA	C/C	C/C	T/T	NA	T/C	NA	T/T	C/C	C/C	T/C	T/C	C/C	T/C	T/C	T/C	T/T	T/T	NA	T/C	T/C	T/C	T/T	T/T	T/T	C/C	T/C	T/T	T/T	T/T	T/T	T/C	T/C
ST4.03ch01pos70245341.1	1	70245341	C/C	C/C	C/C	C/C	C/C	C/C	C/C	C/C	C/C	C/C	C/C	C/C	C/C	C/C	C/C	C/C	C/C	C/C	C/C	C/C	C/C	C/C	C/C	C/C	C/C	C/C	C/C	C/C	C/C	C/C	C/C	C/C	C/C	C/C	C/C	C/C	C/C	C/C	C/C	C/C	C/C	C/C	C/C	C/C	C/C	C/C	C/C
ST4.03ch01pos70422504.1	1	70422504	C/C	C/C	C/C	C/C	T/C	C/C	T/C	C/C	C/C	C/C	C/C	C/C	C/C	C/C	T/T	C/C	T/C	C/C	T/T	C/C	C/C	C/C	C/C	C/C	C/C	C/C	C/C	T/C	T/C	C/C	T/C	C/C	C/C	T/C	T/T	C/C	C/C	C/C	T/C	C/C	C/C	C/C	C/C	T/T	NA	T/T	T/C
ST4.03ch01pos70422542.1	1	70422542	T/C	T/C	C/C	T/T	T/T	T/C	T/C	T/C	C/C	T/C	T/T	T/C	T/C	T/C	T/T	T/C	T/T	C/C	T/T	C/C	T/T	T/C	T/C	T/C	T/C	NA	C/C	T/T	NA	T/C	T/T	T/T	T/T	T/C	T/T	T/C	T/T	T/T	T/T	T/C	T/C	T/T	C/C	T/T	T/C	T/T	T/T
ST4.03ch01pos70438759.1	1	70438759	T/T	T/T	T/T	T/T	NA	T/T	T/A	T/T	T/T	T/T	T/T	T/T	T/T	T/T	T/A	T/T	T/A	T/T	T/A	T/T	T/T	T/T	T/T	T/T	T/T	T/T	T/T	T/A	T/A	T/T	T/T	T/T	T/T	T/T	T/A	NA	T/T	T/T	T/T	T/T	T/T	T/T	T/T	T/T	T/T	T/A	T/A
ST4.03ch01pos70561700.1	1	70561700	T/C	T/T	T/C	T/T	T/T	T/C	NA	T/C	C/C	T/C	T/T	T/C	T/C	T/C	T/T	T/C	T/T	T/C	T/T	C/C	NA	NA	NA	T/C	T/T	NA	C/C	T/T	NA	NA	T/T	T/T	T/T	T/C	T/T	T/T	T/T	T/T	T/T	T/C	T/T	T/T	T/C	T/T	T/C	T/T	T/T
ST4.03ch01pos70561710.1	1	70561710	T/C	NA	C/C	T/T	NA	T/C	T/C	T/C	C/C	T/C	T/T	T/C	T/C	T/C	T/C	T/C	T/T	C/C	T/C	C/C	NA	NA	NA	T/C	C/C	NA	C/C	T/T	T/C	T/C	T/C	T/T	T/T	C/C	T/C	T/C	NA	T/T	T/T	T/C	C/C	T/T	C/C	C/C	T/C	T/C	T/T
ST4.03ch01pos70561719.1	1	70561719	A/C	NA	C/C	A/A	NA	A/C	A/C	A/C	C/C	A/C	A/A	A/C	A/C	A/C	A/C	A/C	A/A	C/C	A/C	C/C	NA	NA	NA	A/C	C/C	NA	C/C	A/A	A/C	A/C	A/C	A/A	A/A	C/C	A/C	A/C	NA	A/A	A/A	A/C	C/C	A/A	C/C	C/C	A/C	A/C	A/A
ST4.03ch01pos70561757.1	1	70561757	A/A	NA	A/G	A/A	A/A	A/A	NA	A/A	A/A	A/A	A/A	A/A	A/A	A/A	A/A	A/A	A/A	A/G	A/A	A/A	NA	A/A	A/A	A/A	G/G	A/A	A/A	A/A	NA	A/A	A/A	A/A	A/A	A/A	A/A	A/A	A/A	A/A	A/A	A/A	G/G	A/A	A/G	A/A	A/A	A/A	A/A
ST4.03ch01pos70561760.1	1	70561760	G/A	G/G	G/A	G/G	NA	G/A	NA	G/A	A/A	G/A	G/G	G/A	G/A	G/A	G/A	G/A	G/G	G/A	G/A	A/A	NA	NA	NA	G/A	G/G	NA	A/A	G/G	NA	G/A	G/A	G/G	G/G	A/A	G/A	NA	NA	G/G	G/G	G/A	G/G	G/G	G/A	A/A	G/A	G/A	G/G
ST4.03ch01pos70911355.1	1	70911355	G/G	G/G	G/G	G/G	C/G	G/G	C/G	G/G	G/G	C/G	G/G	C/G	C/G	G/G	C/G	C/G	C/G	G/G	G/G	G/G	C/G	C/G	C/G	C/G	G/G	C/G	G/G	C/G	C/G	NA	G/G	C/G	G/G	G/G	C/G	C/G	C/G	G/G	C/G	C/G	G/G	G/G	G/G	G/G	C/G	C/G	C/G
ST4.03ch01pos71002833.1	1	71002833	C/T	NA	C/T	T/T	C/T	C/T	C/T	T/T	C/C	C/T	T/T	C/T	C/C	C/T	C/T	C/C	C/T	C/T	T/T	C/T	NA	NA	C/C	NA	C/T	C/T	C/C	C/C	C/C	C/T	T/T	C/T	NA	C/T	C/T	C/T	C/T	T/T	C/C	C/C	C/T	T/T	C/T	T/T	C/T	C/T	C/T
ST4.03ch01pos71032566.1	1	71032566	A/G	A/G	A/G	G/G	NA	A/G	A/G	A/G	A/A	A/G	G/G	A/G	A/G	A/G	A/G	A/G	A/G	A/G	A/A	A/A	G/G	A/G	A/G	A/G	A/G	NA	A/A	A/G	A/G	A/G	G/G	G/G	A/A	A/G	G/G	A/G	A/G	G/G	A/A	A/G	A/G	G/G	A/G	G/G	A/G	A/G	G/G
ST4.03ch01pos71036897.1	1	71036897	G/A	NA	NA	A/A	NA	G/A	G/G	A/A	G/G	G/G	A/A	G/G	G/G	G/A	G/G	G/G	G/G	NA	NA	G/G	G/A	NA	G/G	G/G	NA	G/A	G/G	G/G	NA	G/A	A/A	G/A	G/G	G/A	G/A	G/A	G/A	A/A	G/G	G/G	NA	A/A	NA	A/A	G/G	G/G	G/A
ST4.03ch01pos71036898.1	1	71036898	C/A	NA	NA	A/A	NA	C/A	C/C	A/A	C/C	C/C	A/A	C/C	C/C	C/A	C/C	C/C	C/C	NA	NA	C/C	C/A	NA	C/C	C/C	NA	C/A	C/C	C/C	NA	C/A	A/A	C/A	C/C	C/A	C/A	C/A	C/A	A/A	C/C	C/C	NA	A/A	NA	A/A	C/C	C/C	C/A
ST4.03ch01pos71081753.1	1	71081753	C/C	C/C	C/C	C/C	C/C	C/C	A/C	C/C	C/C	A/C	C/C	A/C	A/C	C/C	A/C	A/C	A/C	C/C	C/C	C/C	NA	NA	A/C	A/C	C/C	A/C	NA	NA	A/C	A/C	C/C	NA	C/C	C/C	A/C	A/C	A/C	C/C	A/C	A/C	C/C	C/C	C/C	C/C	A/C	A/C	A/C
ST4.03ch01pos71081756.1	1	71081756	C/C	C/C	C/C	C/C	C/C	C/C	T/C	C/C	C/C	T/C	C/C	T/C	T/C	C/C	T/C	T/C	T/C	C/C	C/C	C/C	NA	NA	T/C	T/C	C/C	T/C	NA	NA	T/C	T/C	C/C	NA	C/C	C/C	T/C	T/C	T/C	C/C	T/C	T/C	C/C	C/C	C/C	C/C	T/C	T/C	T/C
ST4.03ch01pos71081768.1	1	71081768	A/A	NA	A/T	A/A	NA	A/A	A/T	A/T	A/A	A/T	A/A	A/T	A/A	A/A	A/T	A/A	A/T	A/T	T/T	A/T	A/A	NA	A/A	NA	A/T	NA	NA	A/A	A/A	A/T	A/A	A/A	T/T	A/A	A/A	A/A	A/T	A/A	A/T	A/A	A/T	A/A	A/T	A/A	A/T	A/T	A/A
ST4.03ch01pos71085472.1	1	71085472	C/C	C/A	C/A	C/C	C/A	C/C	C/A	C/A	C/C	C/A	C/C	C/A	C/C	C/C	C/A	C/C	C/A	C/A	A/A	C/A	C/C	C/A	C/C	C/C	C/A	C/A	C/C	C/A	C/A	C/A	C/C	C/C	A/A	C/C	C/C	C/A	C/A	C/C	C/A	C/C	C/A	C/C	C/A	C/C	C/A	C/A	C/C
ST4.03ch01pos71479490.1	1	71479490	NA	A/A	A/A	NA	A/A	A/A	A/A	A/A	A/A	A/A	A/A	A/A	A/A	A/A	A/A	A/A	A/A	A/A	A/A	NA	NA	A/A	A/A	A/A	T/A	A/A	A/A	A/A	A/A	T/A	A/A	NA	T/A	A/A	A/A	A/A	T/A	A/A	A/A	NA	T/A	NA	A/A	T/A	A/A	A/A	A/A
ST4.03ch01pos71500196.1	1	71500196	A/A	A/A	A/A	A/A	NA	A/A	A/A	A/A	A/A	A/A	A/A	A/A	A/A	A/A	A/A	A/A	A/A	A/A	T/A	A/A	A/A	A/A	A/A	NA	T/A	A/A	NA	T/A	A/A	T/A	A/A	A/A	T/A	A/A	A/A	A/A	T/A	A/A	A/A	A/A	T/A	A/A	A/A	T/A	A/A	A/A	A/A
ST4.03ch01pos71581394.1	1	71581394	A/A	NA	A/A	NA	NA	A/A	T/A	A/A	A/A	T/A	A/A	T/A	A/A	A/A	NA	A/A	A/A	A/A	A/A	A/A	NA	T/A	NA	A/A	A/A	A/A	A/A	A/A	NA	NA	A/A	T/A	NA	A/A	T/A	T/A	T/A	A/A	T/A	A/A	A/A	A/A	A/A	A/A	T/A	T/A	T/A
ST4.03ch01pos71590728.1	1	71590728	C/C	C/C	C/C	C/C	T/C	C/C	T/C	C/C	C/C	T/C	C/C	T/C	C/C	C/C	T/C	C/C	C/C	C/C	C/C	C/C	T/C	T/C	C/C	C/C	T/C	C/C	C/C	C/C	T/C	T/C	C/C	T/C	T/C	C/C	T/C	T/C	T/C	C/C	T/C	C/C	T/C	C/C	C/C	C/C	T/C	T/C	T/C
ST4.03ch01pos71781485.1	1	71781485	A/A	NA	A/G	A/A	A/A	A/A	NA	A/A	A/A	A/A	A/A	A/A	A/A	A/A	A/A	A/A	A/G	A/G	A/A	A/A	A/A	NA	A/A	A/A	A/G	A/G	A/A	A/G	A/G	A/G	A/A	A/A	A/G	A/A	A/A	A/G	A/G	A/A	A/A	A/A	A/G	A/A	A/G	A/A	A/A	A/A	A/A
ST4.03ch01pos71813564.1	1	71813564	C/C	G/C	G/C	C/C	C/C	C/C	G/C	C/C	C/C	C/C	C/C	C/C	C/C	C/C	C/C	C/C	NA	G/C	C/C	C/C	C/C	C/C	C/C	C/C	G/C	G/C	C/C	G/C	G/C	C/C	C/C	NA	G/C	C/C	C/C	G/C	C/C	C/C	G/C	C/C	G/C	C/C	G/C	C/C	C/C	C/C	C/C
ST4.03ch01pos71864176.1	1	71864176	G/T	G/T	G/T	T/T	G/T	G/T	G/T	T/T	G/G	G/T	T/T	G/T	G/G	G/T	G/G	G/G	G/G	G/T	G/T	G/T	G/T	G/T	G/G	G/G	G/T	G/T	G/T	G/T	G/T	G/T	T/T	G/T	G/T	G/T	G/T	G/T	G/T	T/T	G/T	G/G	G/T	T/T	G/T	G/T	G/T	G/G	G/T
ST4.03ch01pos72157331.1	1	72157331	G/G	A/G	A/G	G/G	A/G	G/G	A/G	A/G	G/G	A/A	G/G	A/A	G/G	G/G	A/G	A/G	A/A	A/G	A/A	NA	A/A	A/A	NA	NA	A/A	A/G	A/G	A/A	A/G	A/G	G/G	A/A	NA	G/G	A/G	A/G	A/A	A/G	NA	NA	A/A	A/G	A/G	A/G	A/G	A/G	A/G
ST4.03ch01pos72301694.1	1	72301694	G/A	NA	G/A	G/G	G/A	G/A	A/A	G/A	A/A	A/A	G/G	A/A	G/A	G/A	A/A	G/A	G/G	G/A	G/A	A/A	A/A	A/A	G/A	G/A	G/G	G/A	A/A	G/A	G/A	G/A	G/G	A/A	G/G	G/A	G/A	G/A	A/A	G/A	G/A	G/A	G/G	G/A	G/A	G/A	A/A	A/A	G/A
ST4.03ch01pos72301743.1	1	72301743	C/A	NA	C/A	C/C	C/A	C/A	C/A	C/C	C/A	C/C	C/C	C/C	C/A	C/A	C/A	C/A	C/C	C/A	C/C	C/A	C/C	C/C	C/A	C/A	C/C	C/C	C/A	C/C	C/C	C/A	C/C	C/C	C/C	C/A	C/C	NA	C/C	C/C	C/C	C/A	C/C	C/C	C/A	C/C	C/C	C/A	C/C
ST4.03ch01pos72305509.1	1	72305509	C/C	C/C	C/C	C/C	C/C	C/C	C/C	C/C	C/C	C/C	C/C	C/C	C/T	C/C	C/C	C/T	T/T	C/C	C/T	C/C	C/C	C/C	C/T	C/T	C/T	C/T	C/C	C/T	C/T	C/C	C/C	C/C	C/T	C/C	C/C	NA	C/C	C/C	C/C	C/T	C/T	C/C	C/C	C/C	C/C	C/C	C/C
ST4.03ch01pos72305511.1	1	72305511	C/G	C/G	C/G	C/C	C/G	C/G	NA	C/G	G/G	G/G	C/C	G/G	G/G	C/G	G/G	G/G	G/G	C/G	G/G	G/G	G/G	G/G	G/G	G/G	G/G	C/G	G/G	G/G	G/G	C/G	C/C	G/G	C/G	C/G	C/G	C/G	G/G	C/G	C/G	G/G	G/G	C/G	C/G	C/G	G/G	G/G	C/G
ST4.03ch01pos72305521.1	1	72305521	G/A	G/A	G/A	G/G	G/A	G/A	G/A	G/G	G/A	G/G	G/G	G/G	G/A	G/A	G/A	G/A	G/G	G/A	G/G	G/A	G/G	G/G	G/A	G/A	G/G	G/G	G/A	G/G	G/G	G/A	G/G	G/G	G/G	G/A	G/G	G/A	G/G	G/G	G/G	G/A	G/G	G/G	G/A	G/G	NA	G/A	G/G
ST4.03ch01pos72305553.1	1	72305553	T/T	T/C	T/C	T/T	T/C	T/T	T/C	T/C	T/C	C/C	T/T	C/C	T/C	T/T	T/C	T/C	C/C	T/C	C/C	T/C	C/C	C/C	T/C	T/C	C/C	T/C	T/C	C/C	C/C	T/C	T/T	C/C	T/C	T/T	T/C	T/C	C/C	T/C	T/C	T/C	C/C	T/C	T/C	T/C	NA	T/C	T/C
ST4.03ch01pos72305556.1	1	72305556	C/C	C/T	C/T	C/C	C/T	C/C	C/T	C/T	C/T	T/T	C/C	T/T	C/T	C/C	C/T	C/T	T/T	C/T	T/T	C/T	T/T	T/T	C/T	C/T	T/T	C/T	C/T	T/T	NA	C/T	C/C	T/T	C/T	C/C	C/T	C/T	T/T	C/T	C/T	C/T	T/T	C/T	C/T	C/T	NA	C/T	C/T
ST4.03ch01pos72305559.1	1	72305559	G/A	G/A	G/A	G/G	G/A	G/A	G/A	G/G	G/A	G/G	G/G	G/G	G/A	G/A	G/A	G/A	G/G	G/A	G/G	G/A	G/G	G/G	G/A	G/A	G/G	G/G	G/A	G/G	G/G	G/A	G/G	G/G	G/G	G/A	G/G	NA	G/G	G/G	G/G	G/A	G/G	G/G	G/A	G/G	NA	G/A	G/G
ST4.03ch01pos72305574.1	1	72305574	G/G	G/G	G/G	G/G	G/G	G/G	G/G	G/G	G/G	G/G	G/G	G/G	G/A	G/G	G/G	G/A	A/A	G/G	G/A	G/G	G/G	G/G	G/A	G/A	G/A	G/A	G/G	G/A	G/A	G/G	G/G	G/G	G/A	G/G	G/G	NA	G/G	G/G	G/G	G/A	G/A	G/G	G/G	G/G	G/G	G/G	G/G
ST4.03ch01pos72357383.1	1	72357383	G/G	G/A	G/G	G/G	G/A	G/G	G/G	G/G	G/A	G/G	G/G	G/G	G/A	G/G	G/G	G/A	A/A	G/G	G/A	G/G	G/A	NA	G/A	G/A	G/A	G/A	G/A	G/A	G/A	G/A	G/G	G/A	NA	G/G	G/G	G/A	G/A	G/A	A/A	G/A	G/A	G/A	G/G	G/A	G/G	G/G	G/G
ST4.03ch01pos72577048.1	1	72577048	C/A	NA	C/A	C/C	NA	C/A	C/A	C/C	C/A	C/C	C/C	C/C	C/A	C/A	C/A	C/A	C/C	C/A	C/C	C/A	C/C	C/C	NA	NA	C/C	C/C	C/A	C/C	C/C	C/A	C/C	C/C	C/C	C/A	C/C	C/C	C/C	C/C	C/C	C/A	C/C	C/C	C/A	C/C	C/C	C/A	C/C
ST4.03ch01pos72584614.1	1	72584614	G/A	G/A	G/A	G/G	G/G	G/A	G/A	G/G	G/A	G/G	G/G	G/G	G/A	G/A	G/A	G/A	G/G	G/A	G/G	G/A	G/G	G/G	G/A	G/A	G/A	G/G	G/A	G/G	G/G	G/A	G/G	G/G	G/A	G/A	G/G	NA	G/A	G/G	G/G	G/A	G/A	G/G	G/A	G/A	G/G	G/A	G/G
ST4.03ch01pos72677993.1	1	72677993	T/T	NA	NA	T/T	T/T	T/T	T/T	T/T	T/T	T/T	T/T	T/T	T/A	T/T	T/T	NA	T/A	T/A	NA	T/T	T/T	T/T	NA	T/A	A/A	T/T	T/T	T/T	T/T	T/A	T/T	T/T	NA	T/T	T/T	T/T	T/A	T/T	T/A	T/A	A/A	T/T	T/A	T/T	T/T	T/T	T/T
ST4.03ch01pos72730089.1	1	72730089	T/T	NA	T/T	T/T	T/T	T/T	T/T	T/T	T/T	T/T	T/T	T/T	T/T	T/T	T/T	NA	NA	T/T	T/T	T/T	T/T	T/T	T/T	T/T	NA	T/T	T/T	T/T	T/T	C/T	T/T	T/T	NA	T/T	T/T	T/T	T/T	T/T	T/T	T/T	NA	T/T	T/T	C/T	T/T	T/T	T/T
ST4.03ch01pos72813572.1	1	72813572	T/T	NA	A/T	T/T	A/T	T/T	T/T	A/T	A/T	NA	T/T	NA	T/T	T/T	T/T	T/T	A/A	A/T	A/A	A/T	NA	T/T	T/T	T/T	A/T	NA	A/T	A/T	A/T	A/T	T/T	A/T	NA	T/T	T/T	A/T	A/T	A/T	NA	T/T	A/T	A/T	A/T	T/T	A/T	T/T	T/T
ST4.03ch01pos72813579.1	1	72813579	A/A	NA	G/A	A/A	G/A	A/A	A/A	G/A	G/A	NA	A/A	NA	A/A	A/A	A/A	A/A	G/G	G/A	G/G	G/A	NA	A/A	A/A	NA	G/A	NA	G/A	G/A	G/A	G/A	A/A	G/A	G/G	A/A	A/A	G/A	G/A	G/A	NA	A/A	G/A	G/A	G/A	A/A	G/A	A/A	A/A
ST4.03ch01pos72813631.1	1	72813631	T/T	NA	T/A	T/T	T/A	T/T	T/T	T/A	T/A	NA	T/T	NA	T/T	T/T	T/T	T/T	T/T	T/A	NA	T/A	NA	T/T	T/T	T/T	T/T	NA	T/A	T/T	T/T	T/A	T/T	T/A	NA	T/T	T/T	T/A	T/A	T/A	T/T	T/T	T/T	T/A	T/A	T/T	T/A	T/T	T/T
ST4.03ch01pos72817167.1	1	72817167	G/G	A/G	A/G	G/G	A/G	G/G	G/G	A/G	A/G	A/G	G/G	A/G	G/G	G/G	G/G	G/G	A/A	A/G	A/A	A/G	A/G	A/G	G/G	G/G	A/G	A/G	A/G	A/G	A/G	A/G	G/G	A/G	A/A	G/G	G/G	A/G	A/G	A/G	A/G	G/G	A/G	A/G	A/G	G/G	A/G	G/G	G/G
ST4.03ch01pos72854187.1	1	72854187	C/C	NA	T/C	C/C	T/C	C/C	C/C	T/C	T/C	T/C	C/C	T/C	C/C	C/C	C/C	C/C	T/T	T/C	T/C	T/C	NA	NA	C/C	C/C	T/C	NA	T/C	T/C	T/C	T/C	C/C	T/C	T/T	C/C	C/C	T/C	T/C	T/C	T/C	C/C	T/C	T/C	T/C	C/C	T/C	C/C	C/C
ST4.03ch01pos73065558.1	1	73065558	T/G	T/G	T/G	T/G	T/G	T/G	G/G	T/T	T/G	T/G	T/G	T/G	G/G	T/G	G/G	G/G	T/G	T/G	T/G	T/G	T/G	T/G	G/G	G/G	G/G	T/G	T/G	T/G	T/G	T/G	T/T	T/G	NA	T/G	T/G	T/G	T/G	T/T	T/T	G/G	G/G	T/T	T/G	T/G	T/G	G/G	T/G
ST4.03ch01pos73287223.1	1	73287223	G/T	G/T	G/G	G/T	G/T	G/T	G/T	G/T	G/G	G/T	G/T	G/T	G/T	G/T	G/T	G/T	G/T	G/G	G/G	G/G	NA	G/T	G/T	G/T	G/T	G/T	G/T	G/T	G/T	G/T	T/T	G/T	NA	G/T	T/T	G/T	G/T	G/T	T/T	G/T	G/T	G/T	G/G	T/T	G/T	G/T	T/T
ST4.03ch01pos73533688.1	1	73533688	T/T	NA	T/T	T/T	T/T	T/T	NA	T/T	T/T	T/C	T/T	T/C	T/T	T/T	T/C	NA	T/T	T/T	T/T	T/T	T/C	NA	NA	T/T	T/T	T/T	NA	T/T	T/T	T/C	T/T	T/C	T/C	T/T	T/C	T/C	T/C	T/T	T/T	T/T	T/T	T/T	T/T	T/T	T/C	T/C	T/C
ST4.03ch01pos73533689.1	1	73533689	A/A	NA	A/A	A/A	A/A	A/A	NA	A/A	A/A	A/G	A/A	A/G	A/A	A/A	A/G	NA	A/A	A/A	A/A	A/A	A/G	NA	NA	A/A	A/A	A/A	NA	A/A	A/A	A/G	A/A	A/G	A/G	A/A	A/G	A/G	A/G	A/A	A/A	A/A	A/A	A/A	A/A	A/A	A/G	A/G	A/G
ST4.03ch01pos73533690.1	1	73533690	T/T	NA	T/T	T/T	T/T	T/T	NA	T/T	T/T	T/G	T/T	T/G	T/T	T/T	T/G	NA	T/T	T/T	T/T	T/T	T/G	NA	NA	T/T	T/T	T/T	NA	T/T	T/T	T/G	T/T	T/G	T/G	T/T	T/G	T/G	T/G	T/T	T/T	T/T	T/T	T/T	T/T	T/T	T/G	T/G	T/G
ST4.03ch01pos73533691.1	1	73533691	C/C	NA	C/C	C/C	C/C	C/C	NA	C/C	C/C	C/A	C/C	C/A	C/C	C/C	C/A	NA	C/C	C/C	C/C	C/C	C/A	NA	NA	C/C	C/C	C/C	NA	C/C	C/C	C/A	C/C	C/A	C/A	C/C	C/A	C/A	C/A	C/C	C/C	C/C	C/C	C/C	C/C	C/C	C/A	C/A	C/A
ST4.03ch01pos73533692.1	1	73533692	C/C	NA	C/C	C/C	C/C	C/C	NA	C/C	C/C	C/A	C/C	C/A	C/C	C/C	C/A	NA	C/C	C/C	C/C	C/C	C/A	NA	NA	C/C	C/C	C/C	NA	C/C	C/C	C/A	C/C	C/A	NA	C/C	C/A	C/A	C/A	C/C	C/C	C/C	C/C	C/C	C/C	C/C	C/A	C/A	C/A
ST4.03ch01pos73533694.1	1	73533694	T/T	NA	T/T	T/T	T/T	T/T	NA	T/T	T/T	T/C	T/T	T/C	T/T	T/T	T/C	NA	T/T	T/T	T/T	T/T	T/C	NA	NA	T/T	T/T	T/T	NA	T/T	T/T	T/C	T/T	T/C	NA	T/T	T/C	T/C	T/C	T/T	T/T	T/T	T/T	T/T	T/T	T/T	T/C	T/C	T/C
ST4.03ch01pos73533767.1	1	73533767	C/C	C/C	C/C	C/C	C/C	C/C	NA	NA	C/C	C/A	C/C	C/A	C/C	C/C	C/A	NA	C/C	C/C	C/C	C/C	C/A	NA	NA	C/C	C/A	C/C	NA	C/C	C/C	C/A	C/C	C/A	A/A	C/C	C/A	C/A	C/A	C/C	C/C	C/C	C/A	C/C	C/C	C/C	C/A	C/A	C/A
ST4.03ch01pos73533819.1	1	73533819	T/T	T/T	T/T	T/T	T/T	T/T	T/A	T/T	T/T	T/A	T/T	T/A	T/T	T/T	T/A	T/T	T/T	T/T	T/T	T/T	NA	NA	NA	T/T	T/A	T/T	T/A	T/T	T/A	T/A	T/T	T/A	NA	T/T	T/A	T/A	T/A	T/T	T/T	T/T	T/A	T/T	T/T	T/T	T/A	T/A	T/A
ST4.03ch01pos73533824.1	1	73533824	T/T	T/T	T/T	T/T	T/T	T/T	T/C	T/T	T/T	T/C	T/T	T/C	T/T	T/T	T/C	T/T	T/T	T/T	T/T	T/T	NA	NA	NA	T/T	T/C	T/T	T/C	T/T	T/C	T/C	T/T	T/C	NA	T/T	T/C	T/C	T/C	T/T	T/T	T/T	T/C	T/T	T/T	T/T	T/C	T/C	T/C
ST4.03ch01pos73533842.1	1	73533842	T/T	T/T	T/T	T/T	T/T	T/T	T/C	T/T	T/T	T/C	T/T	T/C	T/T	T/T	T/C	T/T	T/T	T/T	T/T	T/T	NA	NA	NA	T/T	T/C	T/T	T/C	T/T	T/C	T/C	T/T	T/C	NA	T/T	T/C	T/C	T/C	T/T	T/T	T/T	T/C	T/T	T/T	T/T	T/C	T/C	T/C
ST4.03ch01pos73721549.1	1	73721549	G/A	G/A	G/A	G/A	NA	G/A	G/A	G/G	G/A	G/G	G/A	G/G	G/A	G/A	G/A	G/A	G/G	G/A	G/A	G/A	G/G	G/G	G/A	G/A	G/G	G/G	G/G	G/A	G/A	G/A	G/G	G/G	G/G	G/A	G/G	G/A	G/G	G/G	G/G	G/A	G/G	G/G	G/A	G/G	G/G	G/A	G/G
ST4.03ch01pos73768374.1	1	73768374	T/C	T/C	T/C	T/C	T/C	T/C	C/C	T/T	T/C	T/C	T/C	T/C	T/C	T/C	C/C	T/C	T/T	T/C	T/C	T/C	T/C	T/C	T/C	T/C	T/C	T/T	T/C	T/C	T/C	T/C	T/T	T/C	T/C	T/C	T/C	T/C	T/C	T/T	T/C	T/C	T/C	T/T	T/C	T/T	T/C	C/C	T/C
ST4.03ch01pos73768406.1	1	73768406	A/A	A/A	A/A	A/A	A/T	A/A	A/T	A/A	A/A	A/T	A/A	A/T	A/A	A/A	A/T	A/A	A/A	A/A	A/A	A/A	A/T	A/T	A/A	A/A	A/A	A/A	A/T	A/A	A/T	A/T	A/A	A/T	A/T	A/A	A/T	A/T	A/T	A/A	A/A	A/A	A/A	A/A	A/A	A/A	A/T	A/T	A/T
ST4.03ch01pos74081473.1	1	74081473	C/C	C/C	C/C	T/C	T/C	T/C	T/C	T/C	C/C	T/C	T/C	T/C	C/C	T/C	T/C	C/C	C/C	C/C	C/C	C/C	T/C	T/C	C/C	C/C	C/C	T/C	T/C	C/C	T/C	T/C	T/C	T/C	T/C	C/C	T/C	T/C	T/C	T/C	T/C	C/C	C/C	T/C	C/C	C/C	T/C	T/C	T/T
ST4.03ch01pos74373392.1	1	74373392	C/G	NA	C/G	C/C	C/G	C/C	C/G	C/G	C/C	C/C	C/C	C/C	C/G	C/C	C/G	C/G	C/C	C/G	C/C	C/C	NA	C/C	C/G	C/G	C/G	C/C	C/G	C/G	NA	C/G	C/G	C/C	C/C	C/G	G/G	C/G	C/C	C/C	C/C	C/G	C/G	C/C	C/G	C/G	C/C	C/G	C/G
ST4.03ch01pos74405226.1	1	74405226	G/G	G/G	G/G	G/C	G/C	G/C	NA	G/G	G/G	G/C	G/C	G/C	G/C	G/C	G/G	G/C	G/C	G/G	G/G	G/C	G/C	G/C	G/C	G/C	G/G	G/C	G/G	G/C	G/C	G/C	G/C	G/C	G/G	G/G	G/G	G/C	G/C	G/C	G/G	G/C	G/G	G/C	G/G	G/G	G/C	G/G	G/C
ST4.03ch01pos74455671.1	1	74455671	A/A	A/A	NA	A/A	A/A	A/A	A/A	A/A	A/A	A/A	A/A	A/A	A/A	A/A	NA	A/A	A/A	A/A	A/A	A/A	NA	NA	NA	A/A	A/A	NA	A/A	A/A	NA	A/A	A/A	A/A	NA	NA	A/A	A/A	NA	A/A	NA	A/A	A/A	A/A	A/A	A/A	A/A	A/A	A/A
ST4.03ch01pos74455701.1	1	74455701	G/G	G/G	NA	G/G	G/G	G/G	G/G	G/G	G/G	G/G	G/G	G/G	G/G	G/G	NA	G/G	G/G	G/G	G/G	G/G	NA	NA	NA	G/G	G/G	NA	G/G	G/G	NA	NA	G/G	G/G	NA	NA	G/G	G/G	NA	G/G	NA	G/G	G/G	G/G	G/G	G/G	G/G	G/G	G/G
ST4.03ch01pos74455709.1	1	74455709	T/T	T/T	NA	T/T	T/T	T/T	T/T	T/T	T/T	T/T	T/T	T/T	T/T	T/T	NA	T/T	T/T	T/T	T/T	T/T	NA	NA	NA	T/T	T/T	NA	T/T	T/T	NA	T/T	T/T	T/T	NA	NA	T/T	T/T	NA	T/T	NA	T/T	T/T	T/T	T/T	T/T	T/T	T/T	T/T
ST4.03ch01pos74519464.1	1	74519464	C/T	C/T	C/T	C/T	C/T	C/T	C/T	C/C	C/T	C/T	C/T	C/T	C/C	C/T	C/T	C/C	C/C	C/T	C/T	C/C	C/C	C/T	C/C	C/C	C/T	C/T	C/C	C/T	C/T	C/T	C/C	C/C	C/C	C/T	C/C	C/T	C/C	C/C	C/C	C/C	C/T	C/C	C/T	C/C	C/T	C/T	C/C
ST4.03ch01pos74520119.1	1	74520119	C/G	C/G	C/G	C/G	C/G	C/G	C/G	C/C	C/G	C/G	C/G	C/G	C/C	C/G	C/G	C/C	C/C	C/G	C/G	C/C	C/C	C/G	NA	C/C	C/G	NA	C/C	C/G	C/G	C/G	C/C	C/C	C/G	C/G	C/C	C/G	C/C	C/C	C/C	C/C	C/G	C/C	C/G	C/C	C/G	C/G	C/C
ST4.03ch01pos74540559.1	1	74540559	C/A	NA	A/A	C/A	C/A	C/A	C/A	C/A	A/A	C/A	C/A	C/A	C/A	C/A	A/A	C/A	C/A	A/A	A/A	C/A	C/A	C/A	C/A	C/A	C/A	C/A	A/A	C/A	C/A	C/A	C/C	C/A	C/C	C/A	C/A	C/A	C/A	C/A	C/A	C/A	C/A	C/A	A/A	C/A	C/A	A/A	C/A
ST4.03ch01pos74541341.1	1	74541341	NA	NA	T/T	C/T	C/T	C/T	T/T	C/T	T/T	C/T	C/T	C/C	T/T	C/T	T/T	T/T	T/T	T/T	T/T	T/T	NA	C/C	T/T	T/T	T/T	NA	T/T	T/T	NA	C/T	C/C	NA	NA	C/T	C/T	C/T	C/T	C/T	T/T	T/T	T/T	C/T	T/T	C/T	C/T	T/T	C/T
ST4.03ch01pos74577339.1	1	74577339	T/T	T/T	T/T	T/T	T/T	T/T	A/T	NA	T/T	T/T	T/T	T/T	A/T	T/T	T/T	A/T	A/A	T/T	T/T	A/A	NA	T/T	A/T	A/T	A/T	NA	NA	A/T	A/T	A/T	NA	NA	A/A	T/T	NA	A/T	A/A	NA	A/T	A/T	A/T	NA	T/T	NA	T/T	T/T	NA
ST4.03ch01pos74587668.1	1	74587668	NA	NA	T/T	T/T	NA	NA	T/T	NA	T/T	NA	T/T	T/T	T/T	T/T	NA	T/T	T/T	T/T	T/T	T/T	NA	T/T	NA	T/T	T/T	T/T	NA	T/T	T/T	T/T	T/A	T/T	T/T	T/A	NA	T/T	T/T	T/T	T/T	T/T	T/T	T/T	T/T	T/A	T/T	T/T	T/T
ST4.03ch01pos74636831.1	1	74636831	G/G	G/G	G/T	G/T	G/T	G/G	G/G	G/G	G/G	G/T	G/T	G/T	G/G	G/G	G/G	G/G	G/G	G/T	G/G	G/G	G/T	G/T	NA	G/G	G/G	G/T	G/G	G/T	G/T	NA	G/T	G/T	G/G	G/G	G/G	G/T	G/T	G/T	G/G	G/G	G/G	G/T	G/T	G/G	G/T	G/G	G/T
ST4.03ch01pos74636867.1	1	74636867	A/A	A/G	G/G	A/G	G/G	A/A	A/G	A/G	A/G	G/G	A/G	G/G	G/G	A/A	NA	G/G	G/G	G/G	A/G	G/G	G/G	G/G	NA	G/G	A/G	G/G	G/G	G/G	G/G	A/G	A/G	G/G	A/G	A/A	A/G	G/G	G/G	G/G	A/G	A/G	A/G	G/G	G/G	A/A	NA	A/G	G/G
ST4.03ch01pos74714351.1	1	74714351	G/G	G/G	NA	G/G	G/G	G/G	G/A	G/G	G/G	G/G	G/G	G/G	A/A	G/G	G/G	A/A	A/A	NA	G/G	A/A	NA	G/G	A/A	A/A	G/G	G/A	NA	A/A	A/A	G/A	G/G	NA	G/A	G/G	G/G	G/A	A/A	NA	G/G	G/A	G/G	NA	NA	G/G	G/G	G/G	NA
ST4.03ch01pos74714462.1	1	74714462	G/G	NA	NA	G/G	G/G	G/G	G/A	G/G	G/G	G/G	G/G	G/G	A/A	G/G	G/G	A/A	A/A	NA	G/G	A/A	NA	G/G	G/A	A/A	G/G	G/A	NA	A/A	G/A	G/A	G/G	NA	G/G	G/G	G/G	G/A	G/A	NA	G/G	G/A	G/G	NA	NA	G/G	G/G	G/G	NA
ST4.03ch01pos74831706.1	1	74831706	T/T	T/T	T/T	T/C	T/C	T/T	T/T	T/T	T/T	T/C	T/C	T/C	T/T	T/T	T/T	T/T	T/T	T/T	T/T	T/T	T/C	T/C	T/T	T/T	T/T	T/C	T/T	T/T	T/C	T/C	T/C	T/C	T/C	T/T	T/T	T/C	T/C	T/C	T/T	T/T	T/T	T/C	T/T	T/T	T/C	T/T	T/C
ST4.03ch01pos74831763.1	1	74831763	C/C	C/C	C/C	C/A	C/A	C/C	C/C	C/C	C/C	C/A	C/A	C/A	C/C	C/C	C/C	C/C	C/C	C/C	C/C	C/C	C/A	C/A	C/C	C/C	C/C	C/A	C/C	C/C	C/A	C/A	C/A	C/A	C/A	C/C	C/C	C/A	C/A	C/A	C/C	C/C	C/C	C/A	C/C	C/C	C/A	C/C	C/A
ST4.03ch01pos75045783.1	1	75045783	A/A	A/A	A/A	A/C	A/C	A/A	A/C	A/A	A/A	A/C	A/C	A/C	A/C	A/A	A/A	A/C	A/A	A/A	A/A	A/C	A/C	A/C	A/C	A/C	A/C	A/C	A/A	A/A	A/C	A/C	A/C	A/C	A/A	A/A	A/A	A/C	A/C	A/C	A/C	A/A	A/C	A/C	A/A	A/A	A/C	A/A	A/C
ST4.03ch01pos75045856.1	1	75045856	C/C	C/C	C/C	C/T	C/T	C/C	NA	C/C	C/C	C/T	C/T	C/T	C/T	C/C	C/C	C/T	C/C	C/C	C/C	C/T	C/C	NA	NA	C/T	C/T	NA	C/C	C/C	C/T	C/T	C/T	C/T	C/T	C/C	C/C	C/T	C/T	C/T	C/T	C/C	C/T	C/T	C/C	C/C	C/T	C/C	C/T
ST4.03ch01pos75058855.1	1	75058855	C/C	C/C	C/G	C/C	C/C	C/C	C/C	C/C	C/C	C/C	C/C	C/C	C/C	C/C	C/C	C/C	C/C	C/G	C/C	C/C	C/C	C/C	C/C	C/C	C/G	C/C	C/C	C/G	C/C	C/C	C/C	C/C	C/C	C/C	C/C	C/C	C/C	C/C	C/C	C/C	C/G	C/C	C/G	C/C	C/C	C/C	C/C
ST4.03ch01pos75643619.1	1	75643619	C/C	A/C	A/C	A/C	A/C	A/C	A/C	C/C	A/C	A/A	A/C	A/A	C/C	A/C	A/C	C/C	A/C	A/C	A/C	C/C	A/A	A/A	C/C	C/C	A/C	A/C	A/A	A/C	A/C	A/C	A/C	A/A	A/C	C/C	A/C	A/C	A/A	A/A	A/C	C/C	A/C	A/A	A/C	A/C	NA	A/C	A/A
ST4.03ch01pos75892715.1	1	75892715	A/A	NA	A/G	A/G	NA	NA	A/A	A/G	A/A	A/G	NA	A/G	A/A	A/G	A/A	A/A	A/A	A/G	A/A	A/G	NA	NA	A/A	A/A	A/A	NA	A/A	A/A	A/A	NA	A/G	A/A	NA	A/A	A/A	NA	A/A	A/G	A/G	A/A	A/A	A/G	A/G	A/A	A/G	A/A	A/G
ST4.03ch01pos75898210.1	1	75898210	G/G	G/G	G/A	G/A	G/A	G/A	G/G	G/A	G/G	G/A	G/A	G/A	G/G	G/A	G/G	G/G	G/G	G/A	G/G	G/A	G/G	G/A	G/G	G/G	G/G	G/G	G/G	G/G	G/G	G/A	G/A	G/G	A/A	G/G	G/G	G/G	G/G	G/A	G/A	G/G	G/G	G/A	G/A	G/G	G/A	G/G	G/A
ST4.03ch01pos75898225.1	1	75898225	C/C	C/C	C/T	C/T	C/T	C/T	C/C	C/T	C/C	C/T	C/T	C/T	C/C	C/T	C/C	C/C	C/C	C/T	C/C	C/T	C/C	C/T	C/C	C/C	C/C	C/C	C/C	C/C	C/C	C/T	C/T	C/C	C/T	C/C	C/C	C/C	C/C	C/T	C/T	C/C	C/C	C/T	C/T	C/C	C/T	C/C	C/T
ST4.03ch01pos76065623.1	1	76065623	T/T	NA	T/T	T/T	T/T	T/T	T/T	T/T	T/T	T/T	T/T	T/T	T/T	T/T	T/T	NA	T/T	T/T	T/T	T/T	NA	T/T	T/T	T/T	T/T	T/T	T/T	T/T	T/T	T/T	T/T	T/T	T/T	T/T	T/T	T/T	T/T	T/T	G/T	T/T	T/T	T/T	T/T	G/T	T/T	T/T	T/T
ST4.03ch01pos76065625.1	1	76065625	A/T	NA	NA	A/A	A/T	A/A	A/T	A/A	A/T	A/T	A/A	A/T	A/T	A/A	A/T	NA	A/T	A/T	A/T	A/T	NA	A/T	A/T	NA	A/A	NA	T/T	A/T	NA	A/T	A/T	T/T	NA	A/T	T/T	NA	T/T	A/T	A/A	A/A	A/A	A/T	A/T	A/T	A/T	A/T	A/T
ST4.03ch01pos76208114.1	1	76208114	G/G	NA	G/G	A/G	A/G	A/G	G/G	G/G	G/G	A/A	A/G	A/A	G/G	A/G	G/G	G/G	G/G	G/G	G/G	G/G	G/G	A/G	G/G	G/G	A/G	NA	G/G	G/G	G/G	NA	A/G	G/G	G/G	G/G	G/G	G/G	NA	A/G	A/G	G/G	A/G	A/G	G/G	G/G	A/G	G/G	A/G
ST4.03ch01pos76208115.1	1	76208115	G/G	NA	G/G	T/G	T/G	T/G	G/G	G/G	G/G	T/T	T/G	T/T	G/G	T/G	G/G	G/G	G/G	G/G	G/G	G/G	G/G	T/G	G/G	G/G	T/G	NA	G/G	G/G	G/G	NA	T/G	G/G	G/G	G/G	G/G	G/G	NA	T/G	T/G	G/G	T/G	T/G	G/G	G/G	T/G	G/G	T/G
ST4.03ch01pos76208121.1	1	76208121	A/A	NA	A/A	G/A	G/A	G/A	A/A	A/A	A/A	G/G	G/A	G/G	A/A	G/A	A/A	A/A	A/A	A/A	A/A	A/A	A/A	G/A	A/A	A/A	G/A	NA	A/A	A/A	A/A	G/A	G/A	A/A	G/A	A/A	A/A	A/A	G/A	G/A	G/A	A/A	G/A	G/A	A/A	A/A	G/A	A/A	G/A
ST4.03ch01pos76208130.1	1	76208130	T/T	NA	T/T	A/T	A/T	A/T	T/T	T/T	T/T	A/A	A/T	A/A	T/T	A/T	T/T	T/T	T/T	T/T	T/T	T/T	T/T	A/T	T/T	T/T	A/T	NA	T/T	T/T	T/T	A/T	A/T	T/T	A/T	T/T	T/T	T/T	A/T	A/T	A/T	T/T	A/T	A/T	T/T	T/T	A/T	T/T	A/T
ST4.03ch01pos76208149.1	1	76208149	A/A	NA	A/A	G/A	G/A	G/A	A/A	A/A	A/A	G/G	G/A	G/G	A/A	G/A	A/A	A/A	A/A	A/A	A/A	A/A	A/A	G/A	A/A	A/A	G/A	G/A	A/A	A/A	A/A	G/A	G/A	A/A	G/A	A/A	A/A	A/A	G/A	G/A	G/A	A/A	G/A	G/A	A/A	A/A	G/A	A/A	G/A
ST4.03ch01pos76208167.1	1	76208167	C/C	NA	C/C	T/C	T/C	T/C	C/C	C/C	C/C	T/T	T/C	T/T	C/C	T/C	C/C	C/C	C/C	C/C	C/C	C/C	C/C	T/C	C/C	C/C	T/C	NA	C/C	C/C	C/C	C/C	T/C	C/C	C/C	C/C	C/C	C/C	C/C	T/C	T/C	C/C	T/C	T/C	C/C	C/C	T/C	C/C	T/C
ST4.03ch01pos76230843.1	1	76230843	G/G	NA	G/G	A/G	A/G	A/G	G/G	G/G	G/G	A/A	A/G	A/A	G/G	A/G	G/G	G/G	G/G	G/G	G/G	G/G	G/G	NA	G/G	G/G	G/G	NA	G/G	G/G	G/G	A/G	A/G	G/G	G/G	G/G	G/G	G/G	G/G	A/G	A/G	G/G	G/G	A/G	G/G	G/G	A/G	G/G	A/G
ST4.03ch01pos76230874.1	1	76230874	A/A	NA	A/A	C/A	C/A	C/A	A/A	A/A	A/A	C/C	C/A	C/C	A/A	C/A	A/A	A/A	A/A	A/A	A/A	A/A	A/A	NA	A/A	A/A	A/A	A/A	A/A	A/A	A/A	NA	C/A	A/A	A/A	A/A	A/A	A/A	A/A	C/A	C/A	A/A	A/A	C/A	A/A	A/A	C/A	A/A	C/A
ST4.03ch01pos76317447.1	1	76317447	C/G	C/G	NA	C/C	C/G	C/C	C/G	C/C	C/G	C/C	C/C	C/C	C/G	C/C	NA	C/G	C/G	C/G	NA	C/G	NA	NA	C/G	C/G	NA	C/G	G/G	C/G	C/G	C/G	C/G	G/G	NA	C/G	G/G	C/G	NA	C/G	C/C	C/C	C/G	C/G	C/G	C/G	C/C	C/G	C/G
ST4.03ch01pos76317461.1	1	76317461	T/T	NA	T/T	C/T	NA	C/T	T/T	T/T	C/T	C/C	C/T	C/C	T/T	C/T	T/T	T/T	T/T	T/T	T/T	T/T	NA	NA	T/T	T/T	T/T	NA	T/T	T/T	T/T	NA	C/T	T/T	NA	T/T	T/T	T/T	NA	C/T	T/T	T/T	T/T	C/T	T/T	T/T	C/T	T/T	C/T
ST4.03ch01pos76317520.1	1	76317520	T/G	NA	NA	T/G	T/G	T/G	T/G	G/G	T/T	T/T	T/G	T/T	T/G	T/G	NA	T/G	T/G	T/G	NA	T/G	NA	NA	T/G	T/G	NA	T/G	T/T	T/G	T/G	T/G	T/T	T/T	NA	T/G	T/T	T/G	T/T	T/T	G/G	G/G	T/G	T/T	T/G	T/G	NA	T/G	T/T
ST4.03ch01pos76345791.1	1	76345791	A/G	A/G	A/G	A/G	NA	A/G	A/G	G/G	A/A	A/A	A/G	A/A	A/G	A/G	A/G	A/G	A/G	A/G	A/G	A/G	A/A	A/A	A/G	A/G	G/G	A/G	A/A	A/G	A/G	A/G	A/A	A/A	G/G	A/G	A/A	A/G	A/A	A/A	G/G	G/G	G/G	A/A	A/G	A/G	A/A	A/G	A/A
ST4.03ch01pos76345817.1	1	76345817	A/G	A/G	A/G	A/G	NA	A/G	A/G	G/G	A/A	A/A	A/G	A/A	A/G	A/G	A/G	A/G	A/G	A/G	A/G	A/G	A/A	A/A	A/G	A/G	A/G	A/G	A/A	A/G	A/G	A/G	A/A	A/A	A/G	A/G	A/A	A/G	A/A	A/A	G/G	G/G	A/G	A/A	A/G	A/G	A/A	A/G	A/A
ST4.03ch01pos76345820.1	1	76345820	A/G	A/G	A/G	A/G	NA	A/G	A/G	G/G	A/A	A/A	A/G	A/A	A/G	A/G	A/G	A/G	A/G	A/G	A/G	A/G	A/A	A/A	A/G	A/G	G/G	A/G	A/A	A/G	A/G	A/G	A/A	A/A	A/G	A/G	A/A	A/G	A/A	A/A	G/G	G/G	G/G	A/A	A/G	A/G	A/A	A/G	A/A
ST4.03ch01pos76345853.1	1	76345853	A/G	A/G	A/G	A/G	NA	A/G	A/G	G/G	A/A	A/A	A/G	A/A	A/G	A/G	A/G	A/G	A/G	A/G	A/G	A/G	A/A	A/A	A/G	A/G	A/G	A/G	A/A	A/G	A/G	A/A	A/A	A/A	A/A	A/G	A/A	A/G	A/A	A/A	G/G	G/G	A/G	A/A	A/G	A/G	A/A	A/G	A/A
ST4.03ch01pos76345855.1	1	76345855	A/G	A/G	A/G	A/G	NA	A/G	A/G	G/G	A/A	A/A	A/G	A/A	A/G	A/G	A/G	A/G	A/G	A/G	A/G	A/G	A/A	A/A	A/G	A/G	G/G	A/G	A/A	A/G	A/G	A/G	A/A	A/A	A/G	A/G	A/A	A/G	A/A	A/A	G/G	G/G	G/G	A/A	A/G	A/G	A/A	A/G	A/A
ST4.03ch01pos76470314.1	1	76470314	T/T	T/T	T/T	T/T	T/T	T/T	T/T	T/T	T/T	T/T	T/T	T/T	T/T	T/T	T/T	T/T	T/T	T/T	T/T	T/T	NA	T/T	T/T	T/T	T/C	T/T	T/T	T/T	T/T	T/C	T/T	T/T	NA	T/T	T/T	T/T	T/T	T/T	T/T	T/C	T/C	T/T	T/T	T/T	T/T	T/T	T/T
ST4.03ch01pos76470379.1	1	76470379	G/G	G/G	G/G	G/G	G/G	G/G	G/G	G/G	G/G	G/G	G/G	G/G	G/G	G/G	G/G	G/G	G/G	G/G	G/G	G/G	NA	G/G	G/G	G/G	G/C	G/G	G/G	G/G	G/G	G/C	G/G	G/G	NA	G/G	G/G	G/G	G/G	G/G	G/G	G/C	G/C	G/G	G/G	G/G	G/G	G/G	G/G
ST4.03ch01pos76788351.1	1	76788351	G/G	NA	G/A	G/G	G/G	G/G	G/G	G/A	G/G	G/G	G/G	G/G	G/G	G/G	G/G	G/G	G/G	G/A	G/G	G/A	G/G	G/G	G/G	G/G	G/A	G/G	G/G	G/G	G/G	NA	G/G	G/G	NA	G/G	G/G	G/G	G/G	G/G	G/G	G/G	G/A	G/G	G/A	G/G	G/G	G/G	G/G
ST4.03ch01pos76788364.1	1	76788364	T/T	NA	T/A	T/T	T/T	T/T	T/T	T/A	T/T	T/T	T/T	T/T	T/T	T/T	T/T	T/T	T/T	T/A	T/T	T/A	T/T	T/T	T/T	T/T	T/A	T/T	T/T	T/T	T/T	NA	T/T	T/T	NA	T/T	T/T	T/T	NA	T/T	T/T	T/T	T/A	T/T	T/A	T/T	T/T	T/T	T/T
ST4.03ch01pos76788411.1	1	76788411	C/C	NA	C/A	C/C	C/C	C/C	C/C	C/A	C/C	C/C	C/C	C/C	C/C	C/C	C/C	C/C	C/C	C/A	C/C	C/A	C/C	C/C	C/C	C/C	C/A	C/C	C/C	C/C	C/C	C/C	C/C	C/C	NA	C/C	C/C	C/C	C/C	C/C	C/C	C/C	C/A	C/C	C/A	C/C	C/C	C/C	C/C
ST4.03ch01pos76945580.1	1	76945580	C/T	NA	C/T	C/T	C/T	C/C	C/T	C/T	C/C	C/C	C/T	C/C	C/C	C/C	C/T	C/C	C/C	C/T	C/T	C/T	C/C	C/C	C/C	C/C	C/T	C/C	C/C	C/C	C/C	C/C	C/C	C/C	C/T	C/T	C/C	C/C	C/C	C/C	C/C	C/C	C/T	C/C	C/T	C/C	NA	C/T	C/C
ST4.03ch01pos76945598.1	1	76945598	C/A	C/A	C/A	C/A	C/A	C/A	C/A	A/A	C/A	C/A	C/A	C/A	C/C	C/A	C/A	C/C	C/A	C/A	A/A	C/A	C/A	C/A	C/C	C/C	A/A	C/A	C/A	C/C	C/A	C/A	C/C	C/A	C/A	C/A	C/C	C/A	C/A	C/A	C/A	C/A	A/A	C/A	C/A	C/C	C/A	C/A	C/C
ST4.03ch01pos76945638.1	1	76945638	T/C	T/C	T/C	T/C	T/C	T/C	T/C	C/C	T/C	T/T	T/C	T/T	T/T	T/C	T/C	T/T	T/C	T/C	C/C	T/C	T/C	NA	T/T	T/T	C/C	T/C	T/C	T/T	T/C	T/C	T/T	T/C	T/C	T/C	T/T	T/C	T/C	T/C	T/C	T/C	C/C	T/C	T/C	T/T	NA	T/C	T/T
ST4.03ch01pos77090382.1	1	77090382	G/A	NA	G/G	G/G	G/G	G/G	G/A	G/G	G/G	G/A	G/G	G/A	G/G	G/G	G/A	G/G	G/G	G/G	G/G	G/G	G/A	G/A	G/G	G/G	G/G	G/A	G/A	G/G	G/A	G/A	G/A	G/A	G/G	G/A	A/A	G/A	G/A	G/G	G/G	G/G	G/G	G/G	G/G	G/A	G/A	G/A	G/A
ST4.03ch01pos77184378.1	1	77184378	G/G	G/G	G/G	G/G	G/G	G/G	G/G	G/G	G/G	G/G	G/G	G/G	G/G	G/G	G/G	G/G	G/G	G/G	G/G	G/G	G/G	G/G	G/G	G/G	G/G	G/G	G/G	G/G	G/G	G/G	G/G	G/G	G/G	G/G	G/G	G/G	G/G	G/G	G/G	G/G	G/G	G/G	G/G	G/G	G/G	G/G	G/G
ST4.03ch01pos77243836.1	1	77243836	G/A	NA	G/G	G/A	G/G	G/G	G/A	G/G	G/G	NA	G/A	G/A	G/G	G/G	NA	G/G	G/G	G/G	G/A	G/G	G/G	NA	G/G	G/G	NA	NA	G/G	G/G	G/G	G/A	G/G	G/G	G/G	G/A	G/G	G/G	G/G	G/G	G/A	G/G	G/G	G/G	G/G	G/G	G/A	G/A	G/G
ST4.03ch01pos77243847.1	1	77243847	A/G	NA	A/A	A/G	A/A	A/A	A/G	A/A	A/A	NA	A/G	A/G	A/A	A/A	NA	A/A	A/A	A/A	A/G	A/A	A/A	NA	A/A	A/A	NA	NA	A/A	A/A	A/A	A/G	A/A	A/A	A/A	A/G	A/A	A/A	A/A	A/A	A/G	A/A	A/A	A/A	A/A	A/A	A/G	A/G	A/A
ST4.03ch01pos77474368.1	1	77474368	C/C	C/C	C/C	C/C	C/C	C/C	C/C	C/C	C/C	C/C	C/C	C/C	C/C	C/C	C/C	C/C	C/C	C/C	C/C	C/C	C/C	C/C	C/C	C/C	C/C	C/C	C/C	C/C	C/C	C/C	C/C	C/C	C/C	C/C	C/C	C/C	C/C	C/C	C/C	C/C	C/C	C/C	C/C	C/C	C/C	C/C	C/C
ST4.03ch01pos77941544.1	1	77941544	G/G	A/G	A/G	G/G	A/G	A/G	A/G	A/G	G/G	G/G	G/G	G/G	A/G	A/G	G/G	A/G	A/A	A/G	A/G	G/G	A/G	G/G	A/G	A/G	A/G	A/G	A/A	A/A	A/G	A/G	G/G	A/G	G/G	G/G	G/G	A/G	A/G	A/G	A/G	A/G	A/G	A/G	A/G	A/G	G/G	G/G	G/G
ST4.03ch01pos77963151.1	1	77963151	C/C	C/C	C/T	C/C	C/C	C/C	C/T	C/C	C/C	C/C	C/C	C/C	C/T	C/C	C/C	C/T	C/T	C/T	C/C	C/C	C/C	C/C	C/T	C/T	C/C	C/T	C/T	T/T	C/T	C/T	C/C	C/C	C/C	C/C	C/C	C/T	C/C	C/C	C/T	C/T	C/C	C/C	C/T	C/C	C/C	C/C	C/C
ST4.03ch01pos77975491.1	1	77975491	A/A	A/A	A/A	A/A	A/A	A/A	A/A	A/A	A/A	A/A	A/A	A/A	A/A	A/A	A/A	A/A	A/A	A/A	A/A	A/A	A/A	A/A	A/A	A/A	A/A	A/A	A/A	A/A	A/A	A/A	A/A	A/A	A/A	A/A	A/A	A/A	A/A	A/A	A/A	A/A	A/A	A/A	A/A	A/A	A/A	A/A	A/A
ST4.03ch01pos77978618.1	1	77978618	A/A	A/A	A/A	A/A	A/A	A/A	A/A	A/A	A/A	A/A	A/A	A/A	A/A	A/A	A/A	A/A	A/A	A/A	A/A	A/A	A/A	A/A	A/A	A/A	A/A	A/A	A/A	A/A	A/A	A/A	A/A	A/A	A/A	A/A	A/A	A/A	A/A	A/A	A/A	A/A	A/A	A/A	A/A	A/A	A/A	A/A	A/A
ST4.03ch01pos78144326.1	1	78144326	A/A	A/T	A/A	A/A	A/A	A/A	A/T	A/A	A/A	A/T	A/A	A/T	A/T	A/A	A/A	A/T	A/A	A/A	A/A	A/T	A/A	A/T	A/T	A/T	A/T	NA	A/A	A/A	A/A	A/T	A/A	A/A	A/A	A/A	A/A	A/A	A/A	A/A	A/T	A/T	A/T	A/A	A/A	A/A	A/T	A/A	A/A
ST4.03ch01pos78144376.1	1	78144376	C/C	C/C	C/C	C/C	C/C	C/C	C/C	C/C	C/C	C/C	C/C	C/C	C/C	C/C	C/C	C/C	C/C	C/C	C/C	C/C	C/C	C/C	C/C	C/C	C/T	C/C	C/C	C/C	C/C	C/C	C/C	C/C	C/T	C/C	C/C	C/C	C/C	C/C	C/C	C/C	C/T	C/C	C/C	C/C	C/C	C/C	C/C
ST4.03ch01pos78191963.1	1	78191963	T/T	T/T	T/T	T/T	T/T	T/T	T/T	T/T	T/T	T/T	T/T	T/T	T/C	T/T	T/T	T/C	T/T	T/T	T/T	T/C	T/T	T/T	T/C	T/C	T/C	T/T	T/T	T/T	T/T	T/T	T/T	T/T	T/T	T/T	T/T	T/T	T/T	T/T	T/T	T/T	T/C	T/T	T/T	T/T	T/T	T/T	T/T
ST4.03ch01pos78565592.1	1	78565592	C/T	C/T	C/C	C/T	C/T	C/T	C/T	C/C	C/T	C/T	C/T	C/T	C/T	C/T	C/T	C/T	C/T	C/C	C/T	C/C	C/C	C/T	C/T	C/T	C/T	C/T	C/C	C/T	C/T	C/T	C/T	C/C	C/T	C/T	C/C	C/C	C/C	C/T	C/T	T/T	C/T	C/T	C/C	C/T	C/T	C/T	T/T
ST4.03ch01pos78565638.1	1	78565638	G/C	G/C	G/G	G/C	G/C	G/C	G/C	G/G	G/C	G/C	G/C	G/C	G/C	G/C	G/C	G/C	G/C	G/G	G/C	G/G	G/G	G/C	G/C	G/C	C/C	G/C	G/G	G/C	G/C	G/C	G/C	G/G	G/C	G/C	G/G	G/G	G/C	G/C	G/C	C/C	C/C	G/C	G/G	G/C	G/C	G/C	C/C
ST4.03ch01pos78578137.1	1	78578137	T/A	NA	T/T	T/A	T/A	T/A	T/A	T/T	T/A	T/A	T/A	T/A	T/A	T/A	T/A	T/A	T/A	T/T	T/A	T/T	T/T	T/A	T/A	T/A	A/A	T/A	T/T	T/A	T/A	T/A	T/A	T/T	A/A	T/A	T/T	T/A	T/T	T/A	T/A	A/A	A/A	T/A	T/T	T/A	T/A	T/A	A/A
ST4.03ch01pos78578159.1	1	78578159	T/A	NA	T/T	T/A	T/A	T/A	T/A	T/T	T/A	T/A	T/A	T/A	T/A	T/A	T/A	T/A	T/A	T/T	T/A	T/T	T/T	T/A	T/A	T/A	A/A	T/A	T/T	T/A	T/A	T/A	T/A	T/T	A/A	T/A	T/T	T/A	T/T	T/A	T/A	A/A	A/A	T/A	T/T	T/A	T/A	T/A	A/A
ST4.03ch01pos78578169.1	1	78578169	T/A	NA	T/T	T/A	T/A	T/A	T/A	T/T	T/A	T/A	T/A	T/A	T/A	T/A	T/A	T/A	T/A	T/T	T/A	T/T	T/T	T/A	T/A	T/A	T/A	T/A	T/T	T/A	T/A	T/A	T/A	T/T	A/A	T/A	T/T	T/A	T/T	T/A	T/A	A/A	T/A	T/A	T/T	T/A	T/A	T/A	A/A
ST4.03ch01pos78579576.1	1	78579576	G/A	G/G	G/G	G/A	G/A	G/A	G/A	G/G	G/A	G/A	G/A	G/A	G/A	G/A	G/A	G/A	G/A	G/G	NA	G/G	G/G	G/A	G/A	NA	A/A	G/A	G/G	G/A	NA	NA	G/A	G/G	NA	G/A	G/G	G/A	NA	G/A	G/A	A/A	A/A	G/A	G/G	G/A	G/A	G/A	A/A
ST4.03ch01pos78579578.1	1	78579578	C/G	C/C	C/C	C/G	C/G	C/G	C/G	C/C	C/G	C/G	C/G	C/G	C/G	C/G	C/G	C/G	C/G	C/C	NA	C/C	C/C	C/G	C/G	NA	C/G	C/G	C/C	C/G	NA	C/C	C/G	C/C	NA	C/G	C/C	C/G	C/C	C/G	C/G	G/G	C/G	C/G	C/C	C/G	C/G	C/G	G/G
ST4.03ch01pos78662603.1	1	78662603	G/G	G/G	G/G	G/G	G/A	G/G	G/A	G/G	G/G	G/G	G/G	G/G	G/A	G/G	G/A	G/A	G/G	G/G	G/G	G/G	G/G	G/G	G/A	G/A	G/G	G/G	G/G	G/G	G/G	G/A	G/G	G/G	G/G	G/G	G/A	G/A	G/G	G/G	G/A	G/G	G/G	G/G	G/G	G/G	G/G	G/A	G/G
ST4.03ch01pos78662631.1	1	78662631	C/T	NA	C/C	C/T	C/T	C/T	C/T	C/C	C/T	C/T	C/T	C/T	C/T	C/T	C/T	C/T	C/T	C/C	C/T	C/C	C/C	C/T	C/T	C/T	C/T	C/T	C/C	C/T	C/T	C/T	C/T	C/C	C/T	C/T	C/C	NA	NA	C/T	C/T	T/T	C/T	C/T	C/C	C/T	C/T	C/T	T/T
ST4.03ch01pos78927753.1	1	78927753	T/A	T/A	T/T	T/A	T/A	T/A	T/A	T/T	T/A	A/A	T/A	A/A	T/A	T/A	A/A	T/A	T/A	T/T	T/A	T/T	T/A	NA	T/A	T/A	A/A	T/A	T/T	T/A	T/A	T/A	T/A	T/A	A/A	T/A	T/A	T/A	T/A	T/A	A/A	A/A	A/A	T/A	T/T	T/A	A/A	A/A	A/A
ST4.03ch01pos78927764.1	1	78927764	A/A	A/A	A/A	A/A	A/G	A/A	A/G	A/A	A/A	A/A	A/A	A/A	A/A	A/A	A/G	A/A	A/A	A/A	A/A	A/A	A/G	A/G	A/A	A/A	A/A	A/A	A/A	A/A	A/G	A/G	A/A	A/G	A/A	A/A	A/G	A/G	A/G	A/A	A/G	A/A	A/A	A/A	A/A	A/A	A/A	A/G	A/A
ST4.03ch01pos78927805.1	1	78927805	A/G	A/G	A/A	A/G	A/G	A/G	A/G	A/A	A/G	G/G	A/G	G/G	A/G	A/G	G/G	A/G	A/G	A/A	A/G	A/A	A/G	NA	A/G	A/G	G/G	A/G	A/A	A/G	A/G	A/G	A/G	A/G	G/G	A/G	A/G	A/G	A/G	A/G	G/G	G/G	G/G	A/G	A/A	A/G	G/G	G/G	G/G
ST4.03ch01pos78941067.1	1	78941067	T/C	T/C	T/C	NA	T/C	NA	NA	T/T	T/C	C/C	T/C	C/C	T/C	T/C	NA	T/C	T/C	T/C	T/C	T/T	NA	NA	NA	NA	C/C	T/C	NA	T/C	T/C	T/C	T/C	T/C	C/C	T/C	T/C	T/C	T/C	T/C	C/C	C/C	C/C	T/C	NA	T/C	C/C	C/C	C/C
ST4.03ch01pos79014558.1	1	79014558	A/G	A/G	A/G	A/G	A/G	A/G	A/G	A/A	A/G	A/G	A/G	A/G	A/G	A/G	A/G	A/G	A/G	A/G	A/G	A/A	A/A	A/G	A/G	A/G	A/G	A/G	A/A	A/G	A/G	A/G	A/G	A/A	A/G	A/G	A/A	A/G	A/A	A/G	A/G	G/G	A/G	A/G	A/G	A/G	A/G	A/G	G/G
ST4.03ch01pos79014939.1	1	79014939	T/G	T/G	T/G	T/G	T/G	T/G	T/G	T/T	T/G	T/G	T/G	T/G	T/G	T/G	T/G	T/G	T/G	T/G	T/G	T/T	T/T	T/G	T/G	T/G	T/G	T/G	T/T	T/G	T/G	T/G	T/G	T/T	T/G	T/G	T/T	T/G	T/T	T/G	T/G	G/G	T/G	T/G	T/G	T/G	T/G	T/G	G/G
ST4.03ch01pos79031056.1	1	79031056	C/C	C/T	C/T	C/C	NA	T/T	C/C	C/T	C/C	T/T	C/C	T/T	C/C	T/T	C/C	NA	T/T	C/T	T/T	C/C	C/C	NA	NA	C/C	C/C	C/T	C/T	C/C	C/C	C/T	C/C	C/C	C/C	C/C	C/C	C/C	NA	T/T	C/C	NA	C/C	T/T	C/T	C/C	C/T	C/C	NA
ST4.03ch01pos79031130.1	1	79031130	T/T	T/C	T/C	T/T	T/C	C/C	T/T	T/C	T/T	C/C	T/T	C/C	T/T	C/C	T/T	T/T	C/C	T/C	C/C	T/T	T/T	T/C	T/T	T/T	C/C	T/C	T/C	T/T	T/T	T/C	T/T	T/T	C/C	T/T	T/T	T/T	T/C	C/C	T/T	NA	C/C	C/C	T/C	T/T	T/C	T/T	NA
ST4.03ch01pos79031174.1	1	79031174	G/G	G/A	G/A	G/G	A/A	A/A	G/A	G/A	G/G	A/A	G/G	A/A	G/G	A/A	A/A	G/G	A/A	G/A	A/A	G/G	G/A	G/A	G/G	G/G	G/A	G/A	G/A	G/G	G/A	G/A	G/G	G/A	A/A	G/G	G/A	G/A	G/A	A/A	A/A	NA	G/A	A/A	G/A	G/G	A/A	A/A	NA
ST4.03ch01pos79064458.1	1	79064458	C/T	C/T	C/T	C/T	C/T	C/T	C/T	C/C	C/T	C/T	C/T	C/T	C/T	C/T	C/T	C/T	C/T	C/T	C/T	C/C	C/C	C/T	C/T	C/T	C/T	C/T	C/C	C/T	C/T	C/T	C/T	C/C	NA	C/T	C/C	NA	C/C	C/T	C/T	T/T	C/T	C/T	C/T	C/T	C/T	C/T	T/T
ST4.03ch01pos79064527.1	1	79064527	T/A	T/A	T/A	T/A	T/A	T/A	T/A	T/T	T/A	T/A	T/A	T/A	T/A	T/A	T/A	T/A	T/A	T/A	T/A	T/T	T/T	T/A	T/A	T/A	T/A	T/A	T/T	T/A	T/A	T/A	T/A	T/T	T/A	T/A	T/T	NA	T/T	T/A	T/A	A/A	T/A	T/A	T/A	T/A	T/A	T/A	A/A
ST4.03ch01pos79085454.1	1	79085454	G/G	NA	NA	G/G	G/A	NA	G/G	NA	G/G	G/A	G/G	G/A	NA	NA	NA	G/G	G/A	G/A	G/A	G/G	NA	NA	G/G	G/G	NA	NA	NA	G/G	NA	G/A	G/G	NA	G/G	G/G	G/G	G/G	NA	G/A	G/G	G/G	G/G	G/A	G/A	G/G	G/A	G/G	G/G
ST4.03ch01pos79085832.1	1	79085832	A/G	A/G	A/G	A/G	G/G	G/G	A/G	A/A	A/G	G/G	A/G	G/G	A/G	G/G	G/G	A/G	G/G	A/G	G/G	A/A	A/G	NA	A/G	A/G	G/G	A/G	A/A	A/G	A/G	A/G	A/G	A/G	G/G	A/G	A/G	A/G	A/G	G/G	G/G	G/G	G/G	G/G	A/G	A/G	G/G	G/G	G/G
ST4.03ch01pos79201895.1	1	79201895	C/C	NA	C/T	C/C	C/C	C/C	C/C	C/C	C/C	C/C	C/C	C/C	C/C	C/C	C/C	C/C	C/C	C/T	C/C	C/C	C/C	C/C	C/C	C/C	C/T	C/C	C/C	C/C	C/C	C/T	C/C	C/C	C/C	C/C	C/C	C/C	NA	C/C	C/C	C/T	C/T	C/C	C/T	C/C	C/C	C/C	C/C
ST4.03ch01pos79221193.1	1	79221193	G/G	NA	G/A	G/G	G/G	G/G	G/G	G/G	G/G	G/G	G/G	G/G	G/A	G/G	G/G	G/A	G/G	G/A	G/G	G/G	NA	G/G	G/A	NA	A/A	G/G	G/G	G/G	G/G	G/A	G/G	G/G	NA	G/G	G/G	G/G	G/G	G/G	G/G	NA	A/A	G/G	G/A	G/G	G/G	G/G	G/G
ST4.03ch01pos79221744.1	1	79221744	C/C	C/C	C/T	C/C	C/C	C/C	C/C	C/C	C/C	C/C	C/C	C/C	C/T	C/C	C/C	C/T	C/C	C/T	C/C	C/C	C/C	C/C	C/T	C/T	C/T	C/C	C/C	C/C	C/C	C/C	C/C	C/C	C/C	C/C	C/C	C/C	C/C	C/C	C/C	C/T	C/T	C/C	C/T	C/C	C/C	C/C	C/C
ST4.03ch01pos79221756.1	1	79221756	A/A	A/A	A/T	A/A	A/A	A/A	NA	A/A	A/A	A/A	A/A	A/A	A/T	A/A	A/A	A/T	A/A	A/T	A/A	A/A	A/A	A/A	A/T	A/T	A/T	A/A	A/A	A/A	A/A	A/A	A/A	A/A	A/A	A/A	A/A	A/A	A/A	A/A	A/A	A/T	A/T	A/A	A/T	A/A	A/A	A/A	A/A
ST4.03ch01pos79221769.1	1	79221769	A/A	A/A	A/G	A/A	A/A	A/A	NA	A/A	A/A	A/A	A/A	A/A	A/G	A/A	A/A	A/G	A/A	A/G	A/A	A/A	A/A	A/A	A/G	A/G	G/G	A/A	A/A	A/A	A/A	A/G	A/A	A/A	A/G	A/A	A/A	A/A	A/A	A/A	A/A	A/G	G/G	A/A	A/G	A/A	A/A	A/A	A/A
ST4.03ch01pos79221974.1	1	79221974	T/T	T/T	T/T	T/T	T/T	T/T	T/T	T/T	T/T	T/T	T/T	T/T	T/C	T/T	T/T	T/C	T/T	T/T	T/T	T/T	T/T	T/T	T/C	T/C	T/T	T/T	T/T	T/T	T/T	T/T	T/T	T/T	T/T	T/T	T/T	T/T	T/T	T/T	T/T	T/T	T/T	T/T	T/T	T/T	T/T	T/T	T/T
ST4.03ch01pos79227526.1	1	79227526	A/A	A/A	A/T	A/A	A/A	A/A	NA	A/A	A/A	A/A	A/A	A/A	A/T	A/A	A/A	A/T	A/A	A/T	A/A	A/A	A/A	A/A	A/T	A/T	A/T	A/A	A/A	A/A	A/A	A/T	A/A	A/A	A/A	A/A	A/A	A/A	A/A	A/A	A/A	A/T	A/T	A/A	A/T	A/A	A/A	A/A	A/A
ST4.03ch01pos79231111.1	1	79231111	A/A	NA	A/A	A/C	NA	A/A	A/A	A/A	A/C	NA	NA	NA	A/A	A/A	NA	A/A	A/A	A/A	A/A	A/A	NA	NA	A/A	A/A	A/C	A/A	A/A	A/A	A/A	NA	A/C	A/A	C/C	A/A	A/A	A/A	NA	A/C	A/A	A/A	NA	A/C	A/A	A/C	A/C	A/A	A/C
ST4.03ch01pos79231115.1	1	79231115	A/A	NA	A/A	A/G	NA	A/A	A/A	A/A	A/G	NA	NA	NA	A/A	A/A	NA	A/A	A/A	A/A	A/A	A/A	NA	NA	A/A	A/A	G/G	A/A	A/A	A/A	A/A	NA	A/G	A/A	G/G	A/A	A/A	A/A	NA	A/G	A/A	A/A	A/G	A/G	A/A	A/G	A/G	A/A	A/G
ST4.03ch01pos79240361.1	1	79240361	T/T	T/T	T/T	T/T	T/T	T/T	T/T	T/T	T/T	T/T	T/T	T/T	T/T	T/T	T/T	T/T	T/T	T/T	T/T	T/T	T/T	T/T	T/T	T/T	T/A	T/T	NA	T/T	T/T	T/A	T/T	T/T	NA	T/T	T/T	T/T	T/T	T/T	T/T	T/T	T/A	T/T	T/T	T/T	T/T	T/T	T/T
ST4.03ch01pos79275892.1	1	79275892	G/A	G/A	G/A	G/A	G/A	G/G	G/A	G/A	A/A	A/A	G/A	A/A	G/A	G/G	G/A	G/A	G/G	G/A	G/G	G/A	A/A	A/A	G/A	G/A	A/A	G/A	G/G	G/G	G/A	G/A	A/A	A/A	A/A	G/A	A/A	G/A	A/A	G/A	A/A	G/A	A/A	G/A	G/A	A/A	A/A	G/A	G/A
ST4.03ch01pos79275958.1	1	79275958	T/T	T/T	T/T	T/C	T/C	T/T	T/T	T/T	T/C	T/C	T/C	T/C	T/T	T/T	T/T	T/T	T/T	T/T	T/T	T/T	T/T	T/C	T/T	T/T	T/C	T/T	T/T	T/T	T/T	T/C	T/C	T/T	T/C	T/T	T/T	T/T	T/C	T/C	T/T	T/T	T/C	T/C	T/T	T/C	T/C	T/T	T/C
ST4.03ch01pos79275973.1	1	79275973	T/T	T/T	T/T	T/C	T/C	T/T	T/T	T/T	T/C	T/C	T/C	T/C	T/T	T/T	T/T	T/T	T/T	T/T	T/T	T/T	T/T	T/C	T/T	T/T	T/C	T/T	T/T	T/T	T/T	T/C	T/C	T/T	T/C	T/T	T/T	T/T	NA	T/C	T/T	T/T	T/C	T/C	T/T	T/C	T/C	T/T	T/C
ST4.03ch01pos79275980.1	1	79275980	C/C	C/C	C/C	C/T	C/T	C/C	C/C	C/C	C/T	C/T	C/T	C/T	C/C	C/C	C/C	C/C	C/C	C/C	C/C	C/C	C/C	C/T	C/C	C/C	C/C	C/C	C/C	C/C	C/C	NA	C/T	C/C	C/T	C/C	C/C	C/C	C/C	C/T	C/C	C/C	C/C	C/T	C/C	C/T	C/T	C/C	C/T
ST4.03ch01pos79275981.1	1	79275981	T/T	T/T	T/T	T/C	T/C	T/T	T/T	T/T	T/C	T/C	T/C	T/C	T/T	T/T	T/T	T/T	T/T	T/T	T/T	T/T	T/T	T/C	T/T	T/T	T/T	T/T	T/T	T/T	T/T	T/C	T/C	T/T	T/C	T/T	T/T	T/T	NA	T/C	T/T	T/T	T/T	T/C	T/T	T/C	T/C	T/T	T/C
ST4.03ch01pos79275992.1	1	79275992	G/G	G/G	G/G	G/A	G/A	G/G	G/G	G/G	G/A	G/A	G/A	G/A	G/G	G/G	G/G	G/G	G/G	G/G	G/G	G/G	G/G	G/A	G/G	G/G	G/G	G/G	G/G	G/G	G/G	NA	G/A	G/G	G/A	G/G	G/G	G/G	G/G	G/A	G/G	G/G	G/G	G/A	G/G	G/A	G/A	G/G	G/A
ST4.03ch01pos79275998.1	1	79275998	G/T	G/T	G/G	G/G	G/T	G/G	G/T	G/T	G/T	G/T	G/G	G/T	G/T	G/G	G/T	G/T	G/G	G/G	G/G	G/T	T/T	G/T	G/T	G/T	G/G	G/T	G/G	G/G	G/T	G/T	G/T	T/T	G/G	G/T	T/T	G/T	G/T	G/G	T/T	G/G	G/G	G/G	G/G	G/T	G/T	G/T	G/G
ST4.03ch01pos79276005.1	1	79276005	T/T	T/T	T/T	T/C	T/C	T/T	T/T	T/T	T/C	T/C	T/C	T/C	T/T	T/T	T/T	T/T	T/T	T/T	T/T	T/T	T/T	T/C	T/T	T/T	T/C	T/T	T/T	T/T	T/T	T/C	T/C	T/T	C/C	T/T	T/T	T/T	T/C	T/C	T/T	T/T	T/C	T/C	T/T	T/C	T/C	T/T	T/C
ST4.03ch01pos79288897.1	1	79288897	C/C	NA	C/C	C/T	C/T	C/C	C/C	C/C	NA	NA	NA	C/T	C/C	C/C	C/C	C/C	C/C	C/C	C/C	C/C	NA	NA	NA	C/C	C/C	C/C	C/C	C/C	C/C	C/C	C/T	C/C	NA	C/C	C/C	C/C	C/C	C/T	C/C	C/C	C/C	C/T	C/C	C/T	C/T	C/C	C/T
ST4.03ch01pos79288898.1	1	79288898	A/A	NA	A/A	A/G	A/G	A/A	A/A	A/A	NA	NA	NA	A/G	A/A	A/A	A/A	A/A	A/A	A/A	A/A	A/A	NA	NA	NA	A/A	A/A	A/A	A/A	A/A	A/A	A/A	A/G	A/A	NA	A/A	A/A	A/A	A/A	A/G	A/A	A/A	A/A	A/G	A/A	A/G	A/G	A/A	A/G
ST4.03ch01pos79288908.1	1	79288908	A/G	NA	A/G	A/G	A/G	A/A	A/G	NA	G/G	G/G	NA	G/G	A/G	A/A	A/G	A/G	A/A	A/G	A/A	A/G	NA	G/G	NA	NA	G/G	A/G	A/A	A/A	A/G	A/G	G/G	G/G	NA	A/G	G/G	A/G	NA	A/G	G/G	A/G	G/G	A/G	A/G	G/G	G/G	A/G	A/G
ST4.03ch01pos79288959.1	1	79288959	G/A	G/A	G/G	G/G	G/A	G/G	G/A	NA	NA	NA	G/G	G/A	G/A	G/G	G/A	G/A	G/G	G/G	G/G	G/A	NA	NA	NA	NA	G/G	G/A	G/G	G/G	NA	G/A	G/A	A/A	NA	G/A	A/A	G/A	NA	G/G	A/A	G/G	G/G	NA	G/G	G/A	G/A	G/A	G/G
ST4.03ch01pos79289284.1	1	79289284	C/C	C/C	C/C	C/A	C/A	C/C	C/C	C/C	C/A	C/A	C/A	C/A	C/C	C/C	C/C	C/C	C/C	C/C	C/C	C/C	C/C	C/A	C/C	C/C	C/C	C/C	C/C	C/C	C/C	C/A	C/A	C/C	C/A	C/C	C/C	C/C	C/C	C/A	C/C	C/C	C/C	C/A	C/C	C/A	C/A	C/C	C/A
ST4.03ch01pos79289296.1	1	79289296	C/T	C/T	C/T	C/T	C/T	C/C	C/T	C/T	T/T	T/T	C/T	T/T	C/T	C/C	C/T	C/T	C/C	C/T	C/C	C/T	T/T	T/T	C/T	C/T	C/T	C/T	C/C	C/C	C/T	C/T	T/T	T/T	C/T	C/T	T/T	C/T	C/T	C/T	T/T	C/T	C/T	C/T	C/T	T/T	T/T	C/T	C/T
ST4.03ch01pos79289359.1	1	79289359	T/C	T/C	T/C	T/C	T/C	T/T	T/C	T/C	C/C	C/C	T/C	C/C	T/C	T/T	T/C	T/C	T/T	T/C	T/T	T/C	C/C	C/C	T/C	T/C	T/C	T/C	T/T	T/T	T/C	T/C	C/C	C/C	T/C	T/C	C/C	T/C	T/C	T/C	C/C	T/C	T/C	T/C	T/C	C/C	C/C	T/C	T/C
ST4.03ch01pos79320461.1	1	79320461	G/G	G/C	G/G	G/G	NA	G/G	G/C	G/G	G/G	G/C	G/G	G/C	NA	G/G	NA	NA	G/G	G/G	G/G	G/G	NA	NA	NA	G/C	G/C	G/G	G/G	G/G	NA	G/C	G/G	NA	G/G	G/G	G/C	G/C	G/C	G/G	C/C	G/G	G/C	G/G	G/G	G/G	G/C	G/C	G/G
ST4.03ch01pos79320471.1	1	79320471	A/A	A/T	A/A	A/A	NA	A/A	A/T	A/A	A/A	A/T	A/A	A/T	NA	A/A	NA	NA	A/A	A/A	A/A	A/A	NA	NA	NA	A/T	A/T	A/A	A/A	A/A	NA	A/T	A/A	NA	A/A	A/A	A/T	A/T	A/T	A/A	T/T	A/A	A/T	A/A	A/A	A/A	A/T	A/T	A/A
ST4.03ch01pos79453438.1	1	79453438	T/T	NA	T/C	T/C	T/C	T/T	T/C	T/T	T/C	C/C	T/C	C/C	T/C	T/T	T/C	T/C	T/T	T/C	T/T	T/C	T/C	T/C	T/C	NA	NA	T/C	T/C	T/C	T/C	T/C	T/C	T/C	C/C	T/T	T/C	T/C	T/C	T/C	C/C	T/T	T/C	T/C	T/C	T/C	NA	T/C	T/C
ST4.03ch01pos79453460.1	1	79453460	G/G	NA	G/A	G/A	G/A	G/G	NA	G/G	G/A	A/A	G/A	A/A	G/G	G/G	G/G	G/G	G/G	G/A	G/G	G/A	G/G	G/A	G/G	NA	G/G	G/A	G/A	G/A	G/A	G/A	G/A	G/G	NA	G/G	G/G	G/A	G/G	G/A	G/G	G/G	G/G	G/A	G/A	G/A	G/A	G/G	G/A
ST4.03ch01pos79453597.1	1	79453597	C/C	C/G	C/G	C/G	C/G	C/C	NA	C/C	C/G	G/G	C/G	G/G	C/C	C/C	C/C	C/C	C/C	C/G	C/C	C/G	C/C	C/G	C/C	C/C	C/C	C/C	C/G	C/G	C/G	C/G	C/G	C/C	C/G	C/C	C/C	C/G	C/C	C/G	C/C	C/C	C/C	C/G	C/G	C/G	C/G	C/C	C/G
ST4.03ch01pos79709813.1	1	79709813	A/G	A/G	A/G	A/G	A/G	A/G	A/G	A/G	A/A	A/G	A/G	A/G	G/G	A/G	A/G	G/G	G/G	A/G	G/G	A/A	A/A	A/G	G/G	G/G	A/G	A/G	A/G	A/G	A/G	A/G	A/A	A/A	A/A	A/G	A/A	A/G	A/A	A/G	A/A	G/G	A/G	A/G	A/G	A/G	A/G	A/G	A/G
ST4.03ch01pos79741169.1	1	79741169	A/G	A/G	NA	A/A	A/G	A/G	A/G	A/G	A/A	A/A	A/A	A/A	A/G	A/G	A/G	NA	G/G	A/G	NA	A/A	A/A	NA	NA	A/G	A/A	A/G	A/G	A/G	A/G	A/G	A/A	A/A	A/G	A/G	A/A	A/A	A/A	A/G	A/A	A/G	A/A	A/G	A/G	A/G	A/A	A/G	A/G
ST4.03ch01pos79741175.1	1	79741175	G/A	G/A	NA	G/G	G/A	G/A	G/A	G/A	G/G	G/G	G/G	G/G	G/A	G/A	G/A	NA	A/A	G/A	NA	G/G	G/G	NA	NA	G/A	G/G	G/A	G/A	G/A	G/A	G/A	G/G	G/G	G/A	G/A	G/G	G/G	G/G	G/A	G/G	G/A	G/G	G/A	G/A	G/A	G/G	G/A	G/A
ST4.03ch01pos79741191.1	1	79741191	C/T	C/T	NA	C/C	C/T	C/T	C/T	C/T	C/C	C/C	C/C	C/C	C/T	C/T	C/T	NA	T/T	C/T	NA	C/C	C/C	NA	NA	C/T	C/C	C/T	C/T	C/T	C/T	C/T	C/C	C/C	C/T	C/T	C/C	C/C	C/C	C/T	C/C	C/T	C/C	C/T	C/T	C/T	C/C	C/T	C/T
ST4.03ch01pos79771630.1	1	79771630	C/T	NA	C/T	C/C	C/T	C/T	C/T	C/T	C/C	C/C	C/C	C/C	C/T	C/T	C/T	NA	T/T	C/T	C/T	C/C	NA	NA	NA	C/T	C/C	NA	C/T	C/T	NA	C/T	C/C	C/C	NA	C/T	C/C	C/T	C/T	C/T	C/C	C/T	C/C	C/T	C/T	C/T	NA	C/T	C/T
ST4.03ch01pos79816308.1	1	79816308	T/T	T/T	T/T	T/T	T/T	T/T	T/T	T/T	T/T	T/T	T/T	T/T	T/T	T/T	T/T	T/T	T/T	T/T	T/T	T/T	T/T	T/T	T/T	T/T	T/C	T/T	T/T	T/T	T/T	T/C	T/T	T/T	T/C	T/T	T/T	T/T	T/T	T/T	T/C	T/T	T/C	T/T	T/T	T/T	T/T	T/T	T/T
ST4.03ch01pos79922839.1	1	79922839	G/G	G/G	G/G	G/G	G/G	G/G	G/G	G/G	G/G	G/G	G/G	G/G	G/G	G/G	G/G	G/G	G/G	G/G	G/G	G/G	G/G	G/G	G/G	G/G	G/G	G/G	G/G	G/G	G/G	G/T	G/G	G/G	G/T	G/G	G/G	G/G	G/T	G/G	G/T	G/G	G/G	G/G	G/G	G/G	G/G	G/G	G/G
ST4.03ch01pos79944193.1	1	79944193	G/G	G/G	G/G	G/G	G/G	G/G	G/G	G/G	G/G	G/G	G/G	G/G	G/G	G/G	G/G	G/G	G/G	G/G	G/G	G/G	G/G	G/G	G/G	G/G	G/A	G/G	G/G	G/G	G/G	G/A	G/G	G/G	G/A	G/G	G/G	G/G	NA	G/G	G/A	G/G	G/A	G/G	G/G	G/G	G/G	G/G	G/G
ST4.03ch01pos79944196.1	1	79944196	C/C	C/C	C/C	C/C	C/C	C/C	C/C	C/C	C/C	C/C	C/C	C/C	C/C	C/C	C/C	C/C	C/C	C/C	C/C	C/C	C/C	C/C	C/C	C/C	C/T	C/C	C/C	C/C	C/C	C/T	C/C	C/C	C/T	C/C	C/C	C/C	NA	C/C	C/T	C/C	C/T	C/C	C/C	C/C	C/C	C/C	C/C
ST4.03ch01pos80123775.1	1	80123775	T/T	T/T	T/T	T/T	T/T	T/T	T/T	T/T	T/T	T/T	T/T	T/T	T/T	T/T	T/T	T/T	T/T	T/T	T/T	T/T	T/T	T/T	T/T	T/T	T/G	T/T	T/T	T/T	T/T	T/G	T/T	T/T	G/G	T/T	T/T	T/T	NA	T/T	T/G	T/T	T/G	T/T	T/T	T/T	T/T	T/T	T/T
ST4.03ch01pos80565634.1	1	80565634	C/C	NA	A/C	NA	A/C	A/C	A/C	C/C	A/C	A/C	A/C	A/C	A/C	A/C	NA	A/C	C/C	A/C	A/C	A/C	A/C	A/C	A/C	A/C	A/A	A/C	A/C	A/C	A/C	A/C	A/C	A/C	C/C	C/C	C/C	A/C	A/C	A/C	C/C	A/C	A/A	A/C	A/C	A/C	A/C	C/C	A/C
ST4.03ch01pos80565682.1	1	80565682	C/A	C/A	C/A	NA	C/A	C/A	C/A	A/A	C/C	C/A	C/A	C/A	C/A	C/A	NA	C/A	A/A	C/A	C/A	C/C	C/C	C/A	C/A	C/A	C/C	C/A	C/A	C/A	NA	C/A	C/C	C/C	C/C	C/A	C/A	NA	C/C	C/A	A/A	C/A	C/C	C/A	C/A	C/C	C/A	A/A	C/A
ST4.03ch01pos80722844.1	1	80722844	NA	NA	C/T	C/T	C/T	C/T	NA	T/T	C/C	C/T	C/T	C/T	NA	C/T	T/T	C/T	T/T	C/T	C/T	C/C	NA	NA	NA	NA	C/C	C/T	NA	C/T	C/T	C/T	C/C	C/C	NA	C/T	C/T	C/T	C/T	C/T	T/T	C/T	C/C	C/T	C/T	C/C	C/T	T/T	C/T
ST4.03ch01pos80722900.1	1	80722900	NA	NA	C/C	C/C	C/C	C/C	C/C	C/C	C/G	C/C	C/C	C/C	C/C	C/C	C/C	C/C	C/C	C/C	C/C	C/G	NA	C/G	NA	C/C	C/G	C/G	C/C	C/C	C/G	C/C	C/G	C/G	NA	C/G	C/G	C/G	C/G	C/C	C/C	C/C	C/G	C/C	C/C	C/G	C/C	C/C	C/C
ST4.03ch01pos80722904.1	1	80722904	NA	NA	A/C	A/C	A/C	A/C	NA	C/C	A/A	A/C	A/C	A/C	NA	A/C	C/C	A/C	C/C	A/C	A/C	A/A	NA	NA	NA	NA	A/A	A/C	NA	A/C	A/C	A/C	A/A	A/A	NA	A/C	A/C	A/C	A/C	A/C	C/C	A/C	A/A	A/C	A/C	A/A	A/C	C/C	A/C
ST4.03ch01pos80743264.1	1	80743264	T/T	T/T	C/T	C/T	C/T	T/T	C/T	T/T	C/T	C/T	C/T	C/T	C/T	T/T	T/T	C/T	T/T	C/T	T/T	T/T	C/T	C/T	C/T	C/T	C/T	T/T	T/T	T/T	C/T	C/T	C/T	C/T	T/T	T/T	T/T	C/T	C/T	C/T	T/T	T/T	C/T	C/T	C/T	C/T	C/T	T/T	C/T
ST4.03ch01pos80751596.1	1	80751596	A/A	NA	NA	A/A	A/G	A/G	A/A	A/G	A/A	A/G	A/A	A/G	A/A	A/G	NA	A/A	A/G	A/G	A/A	A/A	NA	A/G	NA	A/A	A/G	A/A	A/G	A/A	A/A	NA	A/A	A/A	NA	A/A	A/A	NA	A/A	A/G	NA	A/A	A/G	A/G	A/G	A/A	A/G	A/A	A/A
ST4.03ch01pos80751605.1	1	80751605	C/C	NA	NA	C/C	C/T	C/T	C/C	C/T	C/C	C/T	C/C	C/T	C/C	C/T	NA	C/C	C/T	C/T	C/C	C/C	NA	C/T	NA	C/C	C/T	C/C	C/T	C/C	C/C	NA	C/C	C/C	NA	C/C	C/C	NA	C/C	C/T	NA	C/C	C/T	C/T	C/T	C/C	C/T	C/C	C/C
ST4.03ch01pos80751640.1	1	80751640	A/A	NA	G/A	NA	G/A	G/A	NA	G/A	G/A	G/G	G/A	G/G	G/A	G/A	NA	G/A	G/A	G/A	A/A	A/A	NA	NA	G/A	NA	G/A	A/A	G/A	A/A	G/A	G/A	G/A	NA	NA	A/A	A/A	G/A	G/A	G/G	NA	A/A	G/A	G/G	NA	G/A	G/G	A/A	G/A
ST4.03ch01pos80888675.1	1	80888675	A/G	NA	A/A	A/A	A/A	A/A	A/A	A/A	A/G	A/A	A/A	A/A	A/A	A/A	A/A	A/A	A/A	A/A	A/A	A/G	A/G	NA	A/A	A/A	A/G	A/G	A/A	A/A	A/G	A/G	A/G	A/G	G/G	A/G	A/G	A/G	A/G	A/A	A/G	A/A	A/G	A/A	A/A	A/G	A/A	A/A	A/A
ST4.03ch01pos80923249.1	1	80923249	G/A	G/A	G/G	G/G	G/G	G/G	G/G	G/G	G/A	G/G	G/G	G/G	G/G	G/G	G/G	G/G	G/G	G/G	G/G	G/A	G/A	NA	G/G	G/G	G/A	G/A	G/G	G/G	G/A	G/A	G/A	G/A	G/A	G/A	G/A	G/A	G/A	G/G	G/A	G/G	G/A	G/G	G/G	G/A	G/G	G/G	G/G
ST4.03ch01pos80923316.1	1	80923316	T/C	T/C	T/T	T/T	T/T	T/T	T/T	T/T	T/C	T/T	T/T	T/T	T/T	T/T	T/T	T/T	T/T	T/T	T/T	T/C	T/C	T/C	T/T	T/T	T/C	T/C	T/T	T/T	T/C	T/C	T/C	T/C	C/C	T/C	T/C	T/C	T/C	T/T	T/C	T/T	T/C	T/T	T/T	T/C	T/T	T/T	T/T
ST4.03ch01pos80941098.1	1	80941098	T/T	T/T	T/T	T/T	T/T	T/T	T/T	T/T	T/T	T/T	T/T	T/T	T/T	T/T	T/T	T/T	T/T	T/T	T/T	T/T	T/T	T/T	T/T	T/T	T/G	T/T	T/T	T/T	T/T	T/G	T/T	T/T	G/G	T/T	T/T	T/T	T/G	T/T	T/G	T/T	T/G	T/T	T/T	T/T	T/T	T/T	T/T
ST4.03ch01pos80993129.1	1	80993129	A/A	NA	T/T	T/A	NA	T/T	T/A	T/A	T/T	T/T	T/A	T/T	T/A	T/T	T/A	T/A	T/A	T/T	T/A	T/T	T/T	T/T	T/A	T/A	T/T	T/A	T/T	T/A	T/A	T/A	T/T	T/T	T/T	A/A	T/T	T/A	T/T	T/T	T/T	T/A	T/T	T/T	T/T	T/T	T/T	T/A	T/A
ST4.03ch01pos80993144.1	1	80993144	A/A	NA	G/A	G/A	NA	G/A	G/A	G/A	G/G	G/G	G/A	G/G	G/A	G/A	G/A	G/A	G/A	G/A	A/A	A/A	G/G	G/G	G/A	G/A	G/A	G/A	G/A	A/A	G/A	G/A	G/G	G/G	A/A	A/A	G/G	G/A	NA	G/G	A/A	A/A	G/A	G/G	G/A	G/G	G/G	G/A	G/A
ST4.03ch01pos81020107.1	1	81020107	G/A	G/A	G/G	G/G	G/G	G/G	G/G	G/G	A/A	G/G	G/G	G/G	G/G	G/G	G/G	G/G	G/G	G/G	G/G	A/A	G/A	G/A	G/G	G/G	G/G	G/A	G/G	G/G	G/A	G/A	A/A	G/A	G/G	G/A	G/A	G/A	G/A	G/G	NA	G/G	G/G	G/G	G/G	G/A	G/G	G/G	G/G
ST4.03ch01pos81020152.1	1	81020152	C/C	G/C	G/C	C/C	G/C	G/G	G/C	G/C	C/C	G/G	C/C	G/G	G/C	G/G	G/C	G/C	G/C	G/C	C/C	C/C	G/C	G/C	G/C	G/C	G/C	G/C	G/G	G/G	G/C	G/C	C/C	G/C	C/C	C/C	G/C	G/C	G/C	G/G	NA	C/C	G/C	G/G	G/C	G/C	G/C	G/C	G/G
ST4.03ch01pos81027404.1	1	81027404	G/C	G/C	G/C	G/C	G/C	G/G	G/C	G/C	G/G	G/G	G/C	G/G	G/C	G/G	G/C	G/C	G/C	G/C	G/C	G/G	G/G	G/G	G/C	G/C	C/C	G/C	G/G	G/G	G/G	G/C	G/G	G/G	G/G	G/C	G/G	G/G	G/G	G/G	G/G	C/C	C/C	G/G	G/C	G/G	G/G	G/C	G/G
ST4.03ch01pos81027452.1	1	81027452	G/C	G/C	G/G	G/G	G/G	G/G	G/G	G/G	G/C	G/G	G/G	G/G	G/G	G/G	G/G	G/G	G/G	G/G	G/G	G/C	G/C	NA	G/G	G/G	G/G	G/C	G/G	G/G	G/C	G/C	G/C	G/C	G/G	G/C	G/C	G/C	G/C	G/G	G/G	G/G	G/G	G/G	G/G	G/C	G/G	G/G	G/G
ST4.03ch01pos81117028.1	1	81117028	C/C	T/C	T/C	C/C	T/C	T/C	T/C	T/T	C/C	T/C	C/C	T/C	T/T	T/C	T/T	T/T	T/T	T/C	C/C	C/C	NA	T/C	NA	T/T	C/C	T/C	T/C	T/C	T/C	T/C	C/C	T/C	C/C	C/C	T/C	T/C	T/C	T/C	C/C	C/C	C/C	T/C	T/C	T/C	T/C	T/T	T/C
ST4.03ch01pos81117068.1	1	81117068	C/C	A/C	A/C	C/C	A/C	A/C	A/C	A/A	C/C	A/C	C/C	A/C	A/A	A/C	A/A	A/A	A/A	A/C	C/C	C/C	NA	A/C	NA	A/A	C/C	A/C	A/C	A/C	A/C	A/C	C/C	A/C	C/C	C/C	A/C	A/C	A/C	A/C	C/C	C/C	C/C	A/C	A/C	A/C	A/C	A/A	A/C
ST4.03ch01pos81148532.1	1	81148532	T/C	T/C	T/C	C/C	T/C	T/C	T/C	T/C	NA	T/C	C/C	T/C	T/C	T/C	T/C	T/C	T/C	C/C	C/C	NA	T/C	T/C	T/C	T/C	C/C	T/C	NA	T/C	T/C	T/C	T/C	T/C	T/C	T/C	T/C	T/C	T/C	T/C	C/C	C/C	C/C	T/C	NA	T/C	T/C	T/C	T/C
ST4.03ch01pos81148535.1	1	81148535	C/T	NA	C/C	C/T	C/C	C/C	C/T	C/T	C/C	C/C	NA	C/C	C/T	C/C	C/T	C/T	C/T	C/C	NA	C/C	C/C	C/C	C/T	C/T	C/C	C/C	C/C	C/C	C/C	C/C	C/C	C/C	C/C	C/T	C/C	C/C	C/C	C/C	C/C	C/T	C/C	C/C	C/C	C/C	C/C	C/T	C/C
ST4.03ch01pos81148539.1	1	81148539	C/C	C/C	T/C	C/C	T/C	T/C	T/C	T/C	C/C	T/C	C/C	T/C	T/C	T/C	T/C	T/C	T/C	C/C	C/C	C/C	NA	NA	T/C	T/C	C/C	T/C	NA	T/C	T/C	T/C	C/C	T/C	C/C	C/C	T/C	T/C	T/C	T/C	C/C	C/C	C/C	T/C	NA	T/C	T/C	T/C	T/C
ST4.03ch01pos81148540.1	1	81148540	G/G	G/A	G/A	G/A	G/A	G/A	G/A	G/G	G/A	G/A	G/A	G/A	G/G	G/A	G/G	G/G	G/G	G/A	G/A	G/A	G/G	G/A	G/G	G/G	G/A	G/A	G/A	G/A	G/A	G/A	G/A	G/G	NA	G/G	G/G	G/A	G/A	G/A	G/A	G/A	G/A	G/A	G/A	G/G	G/A	G/G	G/A
ST4.03ch01pos81185282.1	1	81185282	A/A	G/A	G/A	A/A	G/A	G/A	G/A	G/A	G/A	G/A	G/A	G/A	G/A	G/A	G/A	G/A	G/A	G/A	A/A	A/A	G/A	G/A	G/A	G/A	G/A	G/A	G/A	G/A	G/A	G/A	G/A	G/A	A/A	A/A	G/A	G/A	G/A	G/A	G/A	G/A	G/A	G/A	G/A	G/A	G/A	G/A	G/A
ST4.03ch01pos81185283.1	1	81185283	C/T	NA	C/C	C/C	C/C	C/C	C/C	C/C	C/T	C/C	C/C	C/C	C/C	C/C	C/C	C/C	C/C	C/C	C/C	C/T	C/T	C/C	C/C	C/C	C/T	C/T	C/C	C/C	C/T	NA	C/T	C/T	NA	C/T	C/T	C/T	C/T	C/C	C/C	C/C	NA	C/C	C/C	C/T	C/C	C/C	C/C
ST4.03ch01pos81185308.1	1	81185308	G/G	G/G	NA	G/G	G/A	G/A	G/G	G/G	G/A	NA	G/A	G/A	G/G	NA	G/G	G/G	G/G	G/A	G/G	G/G	G/G	G/A	G/G	G/G	G/A	G/G	G/G	G/A	NA	G/G	G/A	G/G	G/G	G/G	G/G	NA	G/G	G/A	G/A	G/A	G/A	G/G	G/A	G/G	G/A	G/G	G/A
ST4.03ch01pos81185312.1	1	81185312	T/T	T/A	T/A	T/A	T/A	T/A	T/T	T/T	T/A	T/A	T/A	T/A	T/T	T/A	T/T	T/T	T/T	T/A	T/A	T/A	T/T	T/A	T/T	T/T	T/A	T/T	T/A	T/A	T/A	T/A	T/A	T/T	T/T	T/T	T/T	T/A	T/T	T/A	T/A	T/A	T/A	T/A	T/A	T/T	T/A	T/T	T/A
ST4.03ch01pos81185313.1	1	81185313	A/A	A/A	NA	A/A	A/G	A/G	A/A	A/A	A/G	NA	A/G	A/G	A/A	NA	A/A	A/A	A/A	A/G	A/A	A/A	A/A	A/G	A/A	A/A	A/G	A/A	A/A	A/G	NA	A/A	A/G	A/A	A/A	A/A	A/A	NA	A/A	A/G	A/G	A/G	A/G	A/A	A/G	A/A	A/G	A/A	A/G
ST4.03ch01pos81185319.1	1	81185319	A/T	NA	A/A	A/T	A/A	A/A	NA	A/T	A/A	A/A	A/T	A/A	A/T	A/A	A/T	A/T	A/T	A/A	A/T	A/A	A/A	A/A	A/T	A/T	A/T	A/A	A/A	A/A	A/A	A/T	A/A	A/A	A/T	A/T	A/A	A/A	A/A	A/A	A/A	A/T	A/T	A/A	A/A	A/A	A/A	A/T	A/A
ST4.03ch01pos81185321.1	1	81185321	T/G	NA	T/T	T/G	T/T	T/T	NA	T/G	T/T	T/T	T/G	T/T	T/G	T/T	T/G	T/G	T/G	T/T	T/G	T/T	T/T	T/T	T/G	T/G	T/G	T/T	T/T	T/T	T/T	T/G	T/T	T/T	T/G	T/G	T/T	T/T	T/T	T/T	T/T	T/G	T/G	T/T	T/T	T/T	T/T	T/G	T/T
ST4.03ch01pos81185328.1	1	81185328	A/G	NA	A/A	A/G	A/A	A/A	NA	A/G	A/A	A/A	A/G	A/A	A/G	A/A	A/G	A/G	A/G	A/A	A/G	A/A	A/A	A/A	A/G	A/G	A/G	A/A	A/A	A/A	A/A	A/G	A/A	A/A	A/G	A/G	A/A	A/A	A/A	A/A	A/A	A/G	A/G	A/A	A/A	A/A	A/A	A/G	A/A
ST4.03ch01pos81185330.1	1	81185330	C/A	NA	C/C	C/A	C/C	C/C	NA	C/A	C/C	C/C	C/A	C/C	C/A	C/C	C/A	C/A	C/A	C/C	C/A	C/C	C/C	C/C	C/A	C/A	C/A	C/C	C/C	C/C	C/C	C/A	C/C	C/C	C/A	C/A	C/C	C/C	C/C	C/C	C/C	C/A	C/A	C/C	C/C	C/C	C/C	C/A	C/C
ST4.03ch01pos81185335.1	1	81185335	C/T	NA	C/C	C/T	C/C	C/C	NA	C/T	C/C	C/C	C/T	C/C	C/T	C/C	C/T	C/T	C/T	C/C	C/T	C/C	C/C	C/C	C/T	C/T	C/C	C/C	C/C	C/C	C/C	C/C	C/C	C/C	C/T	C/T	C/C	C/C	C/C	C/C	C/C	C/T	C/C	C/C	C/C	C/C	C/C	C/T	C/C
ST4.03ch01pos81185337.1	1	81185337	T/A	NA	T/T	T/A	T/T	T/T	NA	T/A	T/T	T/T	T/A	T/T	T/A	T/T	T/A	T/A	T/A	T/T	T/A	T/T	T/T	T/T	T/A	T/A	T/T	T/T	T/T	T/T	T/T	T/T	T/T	T/T	T/A	T/A	T/T	T/T	T/T	T/T	T/T	T/A	T/T	T/T	T/T	T/T	T/T	T/A	T/T
ST4.03ch01pos81185348.1	1	81185348	C/A	C/C	C/C	C/A	C/C	C/C	C/A	C/A	C/C	C/C	C/A	C/C	C/A	C/C	NA	C/A	C/A	C/C	C/A	C/C	C/C	C/C	C/A	C/A	C/A	C/C	C/C	C/C	C/C	C/C	C/C	C/C	C/C	C/A	C/C	C/C	C/C	C/C	C/C	C/A	C/A	C/C	C/C	C/C	C/C	C/A	C/C
ST4.03ch01pos81185363.1	1	81185363	A/T	A/A	A/A	A/A	A/A	A/A	A/A	A/A	A/T	A/A	A/A	A/A	A/A	A/A	A/A	A/A	A/A	A/A	A/A	A/T	A/T	A/A	A/A	A/A	A/A	A/T	A/A	A/A	A/T	NA	A/T	A/T	A/A	A/T	A/T	A/T	A/T	A/A	A/A	A/A	A/A	A/A	A/A	A/T	A/A	A/A	A/A
ST4.03ch01pos81202344.1	1	81202344	A/T	NA	A/A	A/T	NA	A/A	T/T	A/T	A/A	A/A	A/T	A/A	T/T	A/A	T/T	NA	A/T	A/A	A/T	A/A	A/A	A/A	NA	T/T	A/A	A/A	A/A	A/A	A/A	A/T	A/A	A/A	A/T	A/T	A/A	A/A	A/A	A/A	A/A	A/T	A/A	A/A	A/A	A/A	A/T	A/T	A/A
ST4.03ch01pos81202345.1	1	81202345	C/T	NA	C/C	C/T	NA	C/C	T/T	C/T	C/C	C/C	C/T	C/C	T/T	C/C	T/T	NA	C/T	C/C	C/T	C/C	C/C	C/C	NA	T/T	C/C	C/C	C/C	C/C	C/C	C/T	C/C	C/C	C/T	C/T	C/C	C/C	C/C	C/C	C/C	C/T	C/C	C/C	C/C	C/C	C/T	C/T	C/C
ST4.03ch01pos81202375.1	1	81202375	C/C	C/T	T/T	C/T	C/T	C/T	C/C	C/C	C/T	NA	C/T	NA	C/C	C/T	C/C	C/C	C/C	T/T	C/T	C/T	C/C	NA	NA	C/C	C/T	NA	C/T	T/T	C/T	C/T	C/T	C/C	C/T	C/C	C/C	C/T	C/C	NA	T/T	C/T	C/T	C/T	T/T	C/C	C/T	C/C	T/T
ST4.03ch01pos81202384.1	1	81202384	C/A	NA	C/C	C/A	NA	C/C	A/A	C/A	C/C	C/C	C/A	C/C	A/A	C/C	A/A	NA	C/A	C/C	C/A	C/C	C/C	C/C	NA	A/A	C/C	C/C	C/C	C/C	C/C	C/A	C/C	C/C	C/A	C/A	C/C	C/C	C/C	C/C	C/C	C/A	C/C	C/C	C/C	C/C	C/A	C/A	C/C
ST4.03ch01pos81202386.1	1	81202386	A/T	NA	A/A	A/T	NA	A/A	T/T	A/T	A/A	A/A	A/T	A/A	T/T	A/A	T/T	NA	A/T	A/A	A/T	A/A	A/A	A/A	NA	T/T	A/T	A/A	A/A	A/A	A/A	A/T	A/A	A/A	A/T	A/T	A/A	A/A	A/A	A/A	A/A	A/T	A/T	A/A	A/A	A/A	A/T	A/T	A/A
ST4.03ch01pos81202388.1	1	81202388	T/G	NA	T/T	T/G	NA	T/T	G/G	T/G	T/T	T/T	T/G	T/T	G/G	T/T	G/G	NA	T/G	T/T	T/G	T/T	T/T	T/T	NA	G/G	T/G	T/T	T/T	T/T	T/T	T/G	T/T	T/T	T/G	T/G	T/T	T/T	T/T	T/T	T/T	T/G	T/G	T/T	T/T	T/T	T/G	T/G	T/T
ST4.03ch01pos81209979.1	1	81209979	T/T	T/A	T/A	T/A	T/A	T/A	T/A	T/T	T/A	T/A	T/A	T/A	T/T	T/A	T/T	T/T	T/T	T/A	T/A	T/A	T/T	T/A	T/T	T/T	T/A	T/A	T/A	T/A	T/A	T/A	T/A	T/T	NA	T/T	T/T	T/A	T/T	T/A	A/A	T/A	T/A	T/A	T/A	T/T	T/A	T/T	T/A
ST4.03ch01pos81210015.1	1	81210015	C/C	T/C	T/C	C/C	T/C	T/C	T/C	T/C	C/C	T/C	C/C	T/C	T/C	T/C	T/C	T/C	T/C	T/C	C/C	C/C	T/C	T/C	T/C	T/C	C/C	T/C	T/C	T/C	T/C	T/C	C/C	T/C	NA	C/C	T/C	T/C	T/C	T/C	C/C	C/C	C/C	T/C	T/C	T/C	T/C	T/C	T/C
ST4.03ch01pos81210024.1	1	81210024	G/T	G/G	G/G	G/T	G/G	G/G	G/T	G/T	G/G	G/G	G/T	G/G	G/T	G/G	G/T	G/T	G/T	G/G	G/T	G/G	G/G	G/G	G/T	G/T	G/G	G/G	G/G	G/G	G/G	G/G	G/G	G/G	NA	G/T	G/G	G/G	G/G	G/G	G/G	G/T	G/G	G/G	G/G	G/G	G/G	G/T	G/G
ST4.03ch01pos81210030.1	1	81210030	G/G	A/G	A/G	G/G	A/G	A/G	A/G	A/G	G/G	A/G	G/G	A/G	A/G	A/G	A/G	A/G	A/G	A/G	G/G	G/G	A/G	A/G	A/G	A/G	G/G	A/G	A/G	A/G	A/G	A/G	G/G	A/G	NA	G/G	A/G	A/G	A/G	A/G	G/G	G/G	G/G	A/G	A/G	A/G	A/G	A/G	A/G
ST4.03ch01pos81210050.1	1	81210050	C/T	C/C	C/C	C/T	C/C	C/C	C/T	C/T	C/C	C/C	C/T	C/C	C/T	C/C	C/T	C/T	C/T	C/C	C/T	C/C	C/C	C/C	C/T	C/T	C/C	C/C	C/C	C/C	C/C	C/C	C/C	C/C	NA	C/T	C/C	C/C	C/C	C/C	C/C	C/T	C/C	C/C	C/C	C/C	C/C	C/T	C/C
ST4.03ch01pos81271286.1	1	81271286	NA	G/G	G/G	G/T	G/G	G/G	G/G	G/G	NA	G/G	NA	G/G	G/G	G/G	G/G	G/G	G/G	G/G	NA	NA	G/G	G/G	G/G	G/G	G/G	G/G	G/G	G/G	G/G	G/G	T/T	G/G	NA	NA	G/G	G/G	G/G	G/G	NA	G/T	G/G	G/G	G/G	G/G	G/G	G/G	G/G
ST4.03ch01pos81271288.1	1	81271288	NA	T/T	T/T	NA	T/T	T/T	T/T	T/T	NA	T/T	NA	T/T	T/T	T/T	T/T	T/T	T/T	T/T	NA	NA	T/T	T/T	T/T	T/T	T/T	T/T	T/T	T/T	T/T	T/T	C/C	T/T	NA	NA	T/T	T/T	T/T	T/T	NA	T/C	T/T	T/T	T/T	T/T	T/T	T/T	T/T
ST4.03ch01pos81271290.1	1	81271290	NA	C/C	C/C	NA	C/C	C/C	C/C	C/C	NA	C/C	NA	C/C	C/C	C/C	C/C	C/C	C/C	C/C	NA	NA	C/C	C/C	C/C	C/C	C/C	C/C	C/C	C/C	C/C	C/C	G/G	C/C	NA	NA	C/C	C/C	C/C	C/C	NA	C/G	C/C	C/C	C/C	C/C	C/C	C/C	C/C
ST4.03ch01pos81271293.1	1	81271293	NA	G/G	G/G	G/A	G/G	G/G	G/G	G/G	A/A	G/G	NA	G/G	G/G	G/G	G/G	G/G	G/G	G/G	NA	A/A	G/G	G/G	G/G	G/G	G/G	G/G	G/G	G/G	G/G	G/G	A/A	G/G	NA	NA	G/G	G/G	G/G	G/G	NA	G/A	G/G	G/G	G/G	G/G	G/G	G/G	G/G
ST4.03ch01pos81271294.1	1	81271294	NA	C/C	C/C	C/G	C/C	C/C	C/C	C/C	NA	C/C	NA	C/C	C/C	C/C	C/C	C/C	C/C	C/C	NA	G/G	C/C	C/C	C/C	C/C	C/C	C/C	C/C	C/C	C/C	C/C	G/G	C/C	NA	NA	C/C	C/C	C/C	C/C	NA	C/G	C/C	C/C	C/C	C/C	C/C	C/C	C/C
ST4.03ch01pos81271295.1	1	81271295	NA	T/T	T/T	T/G	T/T	T/T	T/T	T/T	NA	T/T	NA	T/T	T/T	T/T	T/T	T/T	T/T	T/T	NA	NA	T/T	T/T	T/T	T/T	T/T	T/T	T/T	T/T	T/T	T/T	G/G	T/T	NA	NA	T/T	T/T	T/T	T/T	NA	T/G	T/T	T/T	T/T	T/T	T/T	T/T	T/T
ST4.03ch01pos81271296.1	1	81271296	T/A	T/T	T/T	T/A	T/T	T/T	T/T	T/T	NA	T/T	NA	T/T	T/T	T/T	T/T	T/T	T/T	T/T	NA	A/A	T/T	T/T	T/T	T/T	T/T	T/T	T/T	T/T	T/T	T/T	A/A	T/T	NA	NA	T/T	T/T	T/T	T/T	NA	T/A	T/T	T/T	T/T	T/T	T/T	T/T	T/T
ST4.03ch01pos81271299.1	1	81271299	G/A	G/G	G/G	G/A	G/G	G/G	G/G	G/G	A/A	G/G	NA	G/G	G/G	G/G	G/G	G/G	G/G	G/G	NA	A/A	NA	G/G	G/G	G/G	G/G	G/G	G/G	G/G	G/G	G/G	A/A	G/G	NA	G/A	G/G	G/G	G/G	G/G	NA	G/A	G/G	G/G	NA	G/G	G/G	G/G	G/G
ST4.03ch01pos81271304.1	1	81271304	G/G	A/A	A/A	NA	A/A	A/A	A/A	A/A	G/G	A/A	G/G	A/A	A/A	A/A	A/A	A/A	A/A	A/A	NA	G/G	A/A	A/A	A/A	A/A	G/G	A/A	A/A	A/A	A/A	A/A	G/G	A/A	NA	G/G	A/A	A/A	A/A	A/A	NA	G/G	G/G	A/A	A/A	A/A	A/A	A/A	A/A
ST4.03ch01pos81468160.1	1	81468160	A/C	NA	A/A	C/C	C/C	NA	C/C	C/C	A/C	C/C	C/C	C/C	C/C	NA	C/C	C/C	C/C	A/A	C/C	A/A	A/A	A/C	C/C	C/C	A/C	A/A	NA	A/A	A/A	A/C	A/C	A/A	C/C	A/C	A/A	A/A	A/C	C/C	A/C	A/C	A/C	C/C	A/A	A/C	C/C	C/C	A/C
ST4.03ch01pos81468197.1	1	81468197	T/C	T/C	T/T	T/T	T/T	NA	T/T	T/T	T/C	T/T	T/T	T/T	T/T	NA	T/T	T/T	T/T	T/T	T/T	C/C	T/C	T/C	T/T	T/T	T/T	T/C	NA	T/T	T/C	T/C	T/C	T/C	T/T	T/C	C/C	T/C	T/C	T/T	T/T	T/T	T/T	T/T	T/T	T/C	T/T	T/T	T/T
ST4.03ch01pos81523017.1	1	81523017	C/C	C/T	C/T	C/C	C/T	T/T	C/T	C/T	C/C	C/T	C/C	C/T	C/T	T/T	C/T	C/T	C/T	C/T	C/T	C/T	C/C	C/T	C/T	C/T	C/T	C/T	T/T	C/T	C/T	C/T	C/C	C/C	C/T	C/C	C/T	C/T	C/C	C/T	C/C	C/C	C/T	C/T	C/T	C/C	C/T	C/T	C/C
ST4.03ch01pos81523050.1	1	81523050	C/C	C/G	C/G	C/C	C/G	G/G	C/G	C/G	C/C	C/G	C/C	C/G	C/G	G/G	C/G	C/G	C/G	C/G	C/G	C/G	C/C	C/G	C/G	C/G	C/C	C/G	G/G	C/G	C/G	C/G	C/C	C/C	C/C	C/C	C/G	C/G	C/C	C/G	C/C	C/C	C/C	C/G	C/G	C/C	C/G	C/G	C/C
ST4.03ch01pos81523081.1	1	81523081	G/G	A/G	A/A	G/G	G/G	NA	G/G	G/G	G/G	G/G	G/G	G/G	G/G	NA	G/G	G/G	G/G	A/A	G/G	NA	A/A	G/G	G/G	G/G	A/A	A/A	NA	A/A	A/A	A/G	G/G	A/A	A/A	G/G	NA	A/A	A/G	G/G	A/G	A/G	A/A	G/G	A/A	G/G	G/G	G/G	A/G
ST4.03ch01pos81595651.1	1	81595651	A/A	A/A	A/A	A/A	A/A	A/A	A/A	A/A	A/T	A/A	A/A	A/A	A/A	A/A	A/A	A/A	A/A	A/A	A/A	A/T	NA	NA	A/A	A/A	A/A	A/T	A/A	A/A	A/T	A/T	A/T	A/T	NA	A/T	A/T	A/T	A/T	A/A	A/A	A/A	A/A	A/A	A/A	A/T	A/A	A/A	A/A
ST4.03ch01pos81595652.1	1	81595652	T/T	T/T	T/T	T/T	T/T	T/T	T/T	T/T	T/A	T/T	T/T	T/T	T/T	T/T	T/T	T/T	T/T	T/T	T/T	T/A	T/A	NA	T/T	T/T	T/T	T/A	T/T	T/T	T/A	T/A	T/A	T/A	NA	T/A	T/A	T/A	T/A	T/T	T/T	T/T	T/T	T/T	T/T	T/A	T/T	T/T	T/T
ST4.03ch01pos81595675.1	1	81595675	G/G	T/G	T/G	G/G	T/G	T/T	T/G	T/G	G/G	T/G	G/G	T/G	T/G	T/T	T/G	T/G	T/G	T/G	T/G	T/G	G/G	NA	NA	T/G	G/G	T/G	T/T	T/T	T/G	T/G	G/G	G/G	G/G	G/G	T/G	T/G	G/G	T/G	G/G	G/G	G/G	T/G	T/G	G/G	T/G	T/G	T/G
ST4.03ch01pos81595719.1	1	81595719	A/A	A/A	A/A	A/A	A/A	A/A	A/A	A/A	A/G	A/A	A/A	A/A	A/A	A/A	A/A	A/A	A/A	A/A	A/A	A/G	A/G	NA	A/A	A/A	A/A	A/G	A/A	A/A	A/G	A/G	A/G	A/G	NA	A/G	A/G	A/G	A/G	A/A	A/A	A/A	A/A	A/A	A/A	A/G	A/A	A/A	A/A
ST4.03ch01pos81598272.1	1	81598272	T/T	T/C	T/C	T/T	T/C	C/C	T/C	T/C	T/T	T/C	T/T	T/C	T/C	C/C	T/C	T/C	T/C	T/C	T/C	T/C	T/T	T/C	T/C	T/C	T/T	T/C	C/C	T/C	T/C	T/C	T/T	T/T	T/T	T/T	T/C	T/C	T/T	T/C	T/T	T/T	T/T	T/C	T/C	T/T	T/C	T/C	T/T
ST4.03ch01pos81598306.1	1	81598306	T/T	T/C	T/C	T/T	T/C	C/C	T/C	T/C	T/T	T/C	T/T	T/C	T/C	C/C	T/C	T/C	T/C	T/C	T/C	T/C	T/T	T/C	T/C	T/C	T/T	T/C	C/C	T/C	T/C	T/C	T/T	T/T	T/T	T/T	T/C	T/C	T/T	T/C	T/T	T/T	T/T	T/C	T/C	T/T	T/C	T/C	T/T
ST4.03ch01pos81598311.1	1	81598311	A/A	A/A	A/A	A/A	A/A	NA	A/A	A/A	A/G	A/A	A/A	A/A	A/A	NA	A/A	A/A	A/A	A/A	A/A	G/G	A/G	A/G	A/A	A/A	A/A	A/G	NA	A/A	A/G	A/G	A/G	A/G	A/A	A/G	G/G	A/G	A/G	A/A	A/A	A/A	A/A	A/A	A/A	A/G	A/A	A/A	A/A
ST4.03ch01pos81646350.1	1	81646350	A/A	G/A	G/G	A/A	A/A	NA	A/A	A/A	G/A	A/A	A/A	A/A	A/A	NA	A/A	A/A	A/A	G/G	NA	G/G	G/G	NA	NA	NA	G/G	G/G	NA	NA	G/G	G/A	G/A	G/G	G/G	G/A	G/G	G/G	G/G	A/A	G/G	G/A	G/G	A/A	G/G	G/A	A/A	A/A	A/A
ST4.03ch01pos81698516.1	1	81698516	C/T	NA	C/C	C/T	C/T	C/C	C/C	C/C	T/T	C/T	C/T	C/T	C/C	C/C	C/C	C/C	C/C	C/C	C/C	C/T	C/T	NA	NA	C/C	C/T	C/T	C/C	C/C	C/T	C/T	T/T	C/T	NA	C/T	C/T	C/T	C/T	C/T	C/T	C/C	C/T	C/T	C/C	C/T	C/T	C/C	C/T
ST4.03ch01pos81698537.1	1	81698537	G/A	NA	G/G	G/A	G/A	G/G	G/G	G/G	A/A	G/A	G/A	G/A	G/G	G/G	G/G	G/G	G/G	G/G	G/G	G/A	G/A	NA	NA	G/G	G/A	G/A	G/G	G/G	G/A	G/A	A/A	G/A	NA	G/A	G/A	G/A	G/A	G/A	G/A	G/G	G/A	G/A	G/G	G/A	G/A	G/G	G/A
ST4.03ch01pos81707234.1	1	81707234	A/C	NA	A/C	A/C	A/C	C/C	A/C	A/C	C/C	C/C	A/C	C/C	A/C	C/C	NA	A/C	A/C	NA	A/C	C/C	NA	NA	NA	A/C	A/C	A/C	C/C	A/C	A/C	A/C	C/C	A/C	C/C	A/C	C/C	A/C	A/C	C/C	A/C	A/A	A/C	C/C	A/C	A/C	C/C	A/C	A/C
ST4.03ch01pos81707235.1	1	81707235	A/A	NA	A/G	A/A	A/G	G/G	A/G	A/G	A/G	A/G	A/A	A/G	A/G	G/G	NA	A/G	A/G	NA	A/G	G/G	NA	A/G	NA	A/G	A/A	A/G	G/G	A/G	A/G	A/G	A/G	A/G	NA	A/G	G/G	A/G	A/G	A/G	A/A	A/A	A/A	A/G	A/G	A/G	A/G	A/G	A/A
ST4.03ch01pos81707250.1	1	81707250	C/T	C/T	C/C	C/T	C/T	C/C	C/C	C/C	C/T	C/T	C/T	C/T	C/C	C/C	C/C	C/C	C/C	C/C	C/C	C/C	NA	C/T	C/C	C/C	C/C	C/C	C/C	C/C	C/C	C/C	C/T	C/C	C/C	C/C	C/C	C/C	C/C	C/T	C/T	C/C	C/C	C/T	C/C	C/C	C/T	C/C	C/T
ST4.03ch01pos81824646.1	1	81824646	A/A	A/A	A/A	A/A	G/A	NA	NA	A/A	NA	NA	A/A	G/G	A/A	G/G	NA	A/A	A/A	A/A	A/A	G/G	A/A	NA	A/A	A/A	A/A	A/A	NA	G/G	NA	A/A	G/G	A/A	G/G	A/A	NA	G/A	A/A	G/G	A/A	A/A	A/A	NA	A/A	A/A	G/A	A/A	G/G
ST4.03ch01pos81875482.1	1	81875482	NA	T/G	T/G	NA	G/G	G/G	G/G	G/G	G/G	G/G	T/G	G/G	T/G	G/G	NA	G/G	T/G	T/G	T/G	G/G	NA	G/G	NA	NA	NA	T/G	G/G	T/G	T/G	T/G	G/G	NA	G/G	T/G	G/G	T/G	T/G	G/G	T/T	T/T	T/G	G/G	T/G	T/G	G/G	T/G	T/G
ST4.03ch01pos81875502.1	1	81875502	NA	G/C	G/C	NA	C/C	C/C	C/C	C/C	C/C	C/C	G/C	C/C	G/C	C/C	NA	C/C	G/C	G/C	G/C	C/C	NA	C/C	NA	NA	NA	G/C	C/C	G/C	G/C	G/C	C/C	NA	C/C	G/C	C/C	G/C	G/C	C/C	G/G	G/G	G/C	C/C	G/C	G/C	C/C	G/C	G/C
ST4.03ch01pos81875512.1	1	81875512	NA	C/T	C/T	NA	T/T	T/T	T/T	T/T	T/T	T/T	C/T	T/T	C/T	T/T	NA	T/T	C/T	C/T	C/T	T/T	NA	T/T	NA	NA	NA	C/T	T/T	C/T	C/T	C/T	T/T	NA	T/T	C/T	T/T	C/T	C/T	T/T	C/C	C/C	C/T	T/T	C/T	C/T	T/T	C/T	C/T
ST4.03ch01pos81875516.1	1	81875516	G/G	NA	G/G	G/G	G/G	G/C	G/C	G/G	G/G	G/G	G/G	G/G	G/C	G/C	G/G	C/C	G/G	G/G	G/G	G/C	NA	G/G	NA	NA	G/G	G/G	G/C	G/C	G/C	NA	G/G	G/G	G/G	G/G	G/G	G/C	G/G	G/G	G/G	G/G	G/G	G/G	G/G	G/G	G/G	G/G	G/G
ST4.03ch01pos81885780.1	1	81885780	T/T	NA	NA	T/T	T/T	T/T	T/T	T/T	T/T	T/T	T/T	T/T	T/T	T/T	NA	T/T	T/T	T/A	T/T	T/T	NA	NA	NA	T/T	NA	NA	T/T	T/T	NA	T/A	T/T	NA	NA	T/T	T/T	T/A	T/A	T/T	T/A	T/A	T/A	T/T	NA	T/T	T/T	T/T	T/T
ST4.03ch01pos81982522.1	1	81982522	A/A	T/A	T/A	A/A	A/A	T/A	T/A	A/A	A/A	T/A	A/A	T/A	T/A	T/A	A/A	T/A	A/A	T/A	A/A	T/A	A/A	T/A	T/A	T/A	T/A	T/A	T/A	T/T	T/A	T/A	A/A	A/A	A/A	A/A	A/A	T/A	A/A	A/A	A/A	A/A	T/A	A/A	T/A	A/A	T/A	A/A	T/A
ST4.03ch01pos81982592.1	1	81982592	C/C	C/T	C/C	C/C	C/C	C/T	C/T	C/C	C/C	C/T	C/C	C/T	C/T	C/T	C/C	C/T	C/C	C/C	C/C	C/T	C/C	C/T	C/T	C/T	C/C	C/T	C/T	C/T	C/T	C/T	C/C	C/C	C/C	C/C	C/C	C/T	C/C	C/C	C/C	C/C	C/C	C/C	C/C	C/C	C/T	C/C	C/C
ST4.03ch01pos82208100.1	1	82208100	T/T	NA	T/T	T/T	T/T	T/G	NA	T/T	T/T	T/G	T/T	NA	T/G	T/G	T/T	NA	T/T	T/T	T/T	T/G	NA	T/G	T/G	NA	T/T	NA	T/G	T/G	T/G	NA	T/T	T/T	T/T	T/T	T/T	T/G	T/T	T/T	T/T	T/T	T/T	T/T	T/T	T/T	T/G	T/T	T/T
ST4.03ch01pos82208104.1	1	82208104	A/A	NA	A/A	A/A	A/A	A/G	NA	A/A	A/A	A/G	A/A	NA	A/G	A/G	A/A	NA	A/A	A/A	A/A	A/G	NA	A/G	A/G	NA	A/A	NA	NA	A/G	A/G	A/G	A/A	A/A	NA	A/A	A/A	A/G	A/A	A/A	A/A	A/A	A/A	A/A	A/A	A/A	A/G	A/A	A/A
ST4.03ch01pos82208154.1	1	82208154	A/A	NA	A/A	A/A	A/A	A/C	NA	A/A	A/A	A/C	A/A	NA	A/C	A/C	A/A	A/C	A/A	A/A	A/A	A/C	NA	A/C	A/C	NA	A/A	NA	A/C	A/C	A/C	A/C	A/A	A/A	NA	A/A	A/A	A/C	A/A	A/A	A/A	A/A	A/A	A/A	A/A	A/A	A/C	A/A	A/A
ST4.03ch01pos82208225.1	1	82208225	G/T	G/T	G/T	G/T	NA	T/T	G/T	G/T	G/T	T/T	G/T	T/T	G/T	T/T	G/T	G/T	G/T	G/T	G/T	T/T	G/T	T/T	G/T	G/T	G/T	G/T	T/T	T/T	G/T	G/T	G/T	G/T	NA	G/G	G/T	G/T	G/T	T/T	G/T	G/G	G/T	T/T	G/T	G/T	T/T	G/T	T/T
ST4.03ch01pos82216703.1	1	82216703	G/G	NA	G/G	G/G	G/G	G/C	G/C	G/G	G/G	G/C	G/G	G/C	G/C	G/C	G/G	G/C	G/G	G/G	G/G	G/C	G/G	NA	NA	G/C	G/G	NA	NA	G/C	G/G	NA	G/G	G/G	NA	G/G	G/G	G/C	G/G	G/G	G/G	G/G	G/G	G/G	G/G	G/G	G/C	G/G	G/G
ST4.03ch01pos82216732.1	1	82216732	G/G	NA	G/G	G/G	G/G	G/A	G/A	G/G	G/G	G/A	G/G	G/A	G/A	G/A	G/G	G/A	G/G	G/G	G/G	G/A	G/G	NA	G/A	G/A	G/G	NA	NA	G/A	G/G	NA	G/G	G/G	NA	G/G	G/G	G/A	G/G	G/G	G/G	G/G	G/G	G/G	G/G	G/G	G/A	G/G	G/G
ST4.03ch01pos82383910.1	1	82383910	T/T	NA	T/C	T/T	T/T	T/T	T/T	T/T	T/T	T/C	T/T	T/C	T/T	T/T	T/T	T/T	T/T	T/C	T/C	T/T	T/T	T/T	NA	T/T	T/C	NA	T/T	T/C	T/C	T/C	T/T	T/T	NA	T/T	T/T	NA	T/C	T/T	T/T	T/T	T/C	T/T	T/C	T/T	T/C	T/T	T/C
ST4.03ch01pos82383946.1	1	82383946	C/T	C/C	C/C	C/T	NA	C/C	C/T	C/T	C/C	C/C	C/T	C/C	C/T	C/C	NA	C/T	C/T	C/C	C/T	C/C	C/C	C/C	NA	C/T	C/C	C/C	C/C	C/C	C/C	C/C	C/C	C/C	C/C	C/T	C/C	C/C	C/C	C/C	C/C	C/T	C/C	C/C	C/C	C/T	C/C	C/T	C/C
ST4.03ch01pos82410538.1	1	82410538	T/T	T/T	T/C	T/T	T/T	T/T	T/T	T/T	T/T	T/T	T/T	T/T	T/T	T/T	T/T	T/T	T/T	T/C	T/T	T/T	T/T	T/T	T/T	T/T	T/T	T/C	T/T	T/C	T/C	T/T	T/T	T/T	T/T	T/T	T/T	T/T	T/T	T/T	T/T	T/T	T/T	T/T	T/C	T/T	T/T	T/T	T/C
ST4.03ch01pos82800569.1	1	82800569	G/A	NA	G/A	G/A	G/A	G/G	G/G	G/G	A/A	A/A	G/A	A/A	G/G	G/G	G/G	G/G	G/A	G/A	G/G	G/G	A/A	A/A	G/G	G/G	G/A	G/A	G/G	G/G	G/A	G/A	A/A	A/A	G/G	G/G	NA	G/A	NA	G/A	A/A	G/A	G/A	G/A	G/A	G/G	G/A	G/G	G/A
ST4.03ch01pos82800575.1	1	82800575	T/C	NA	T/C	T/C	T/C	C/C	C/C	C/C	T/T	T/T	T/C	T/T	C/C	C/C	C/C	C/C	T/C	T/C	C/C	C/C	T/T	T/T	C/C	C/C	T/C	T/C	C/C	C/C	T/C	T/C	T/T	T/T	C/C	C/C	NA	T/C	NA	T/C	T/T	T/C	T/C	T/C	T/C	C/C	T/C	C/C	T/C
ST4.03ch01pos82800693.1	1	82800693	T/G	T/G	T/G	T/G	T/G	G/G	G/G	G/G	T/T	T/T	T/G	T/T	G/G	G/G	G/G	G/G	T/G	T/G	G/G	G/G	T/T	T/T	G/G	G/G	T/G	T/G	G/G	G/G	T/G	T/G	T/T	T/T	G/G	G/G	NA	T/G	T/T	T/G	T/T	T/G	T/G	T/G	T/G	G/G	T/G	G/G	T/G
ST4.03ch01pos82981484.1	1	82981484	A/A	NA	A/A	A/A	A/A	A/A	G/A	A/A	G/A	A/A	A/A	A/A	A/A	A/A	G/A	A/A	A/A	A/A	G/A	G/A	G/A	NA	A/A	A/A	A/A	G/A	A/A	A/A	G/A	G/A	G/A	G/A	A/A	G/A	G/G	G/A	G/A	A/A	G/A	A/A	A/A	A/A	A/A	G/A	NA	G/A	A/A
ST4.03ch01pos83140526.1	1	83140526	G/G	NA	G/G	G/G	G/G	G/G	G/G	G/G	G/G	G/G	G/G	G/G	G/G	G/G	G/G	G/G	G/G	G/G	G/G	A/G	NA	G/G	G/G	G/G	G/G	A/G	G/G	G/G	NA	A/G	G/G	NA	A/G	G/G	G/G	A/G	A/G	G/G	NA	G/G	G/G	G/G	G/G	A/G	G/G	G/G	G/G
ST4.03ch01pos83284256.1	1	83284256	T/T	T/T	T/T	T/T	T/T	T/T	T/T	T/T	T/T	T/T	T/T	T/T	T/T	T/T	T/T	T/T	T/T	T/T	T/T	T/T	T/T	T/T	T/T	T/T	T/C	T/T	T/T	T/T	T/T	T/C	T/T	T/T	C/C	T/T	T/T	T/T	T/C	T/T	T/T	T/T	T/C	T/T	T/T	T/T	T/T	T/T	T/T
ST4.03ch01pos83396369.1	1	83396369	G/G	G/G	G/G	G/G	G/G	G/G	G/G	G/G	G/G	G/G	G/G	G/G	G/G	G/G	G/G	G/G	G/G	G/G	G/G	G/G	G/T	NA	G/G	G/G	G/T	G/G	G/G	G/G	G/T	G/T	G/G	NA	G/T	G/G	G/G	G/T	G/T	G/G	G/G	G/G	G/T	G/G	G/G	G/G	G/G	G/G	G/G
ST4.03ch01pos83638118.1	1	83638118	A/A	A/A	A/A	A/A	A/G	G/G	A/G	NA	A/A	NA	A/A	A/A	NA	G/G	NA	NA	A/A	A/A	NA	A/G	NA	NA	NA	NA	A/A	A/A	G/G	A/G	NA	A/G	A/A	NA	NA	A/A	A/A	A/G	NA	A/G	NA	A/G	A/A	A/G	A/A	A/A	A/A	A/G	A/A
ST4.03ch01pos83638130.1	1	83638130	A/G	A/A	A/A	NA	A/G	G/G	G/G	G/G	A/A	NA	A/G	A/A	NA	G/G	NA	G/G	A/G	A/A	NA	A/G	NA	NA	G/G	NA	A/A	A/A	G/G	A/G	NA	A/G	A/A	NA	NA	A/G	A/G	A/G	NA	A/G	NA	G/G	A/A	A/G	A/A	A/G	A/A	G/G	A/A
ST4.03ch01pos83654859.1	1	83654859	C/C	C/G	C/G	C/C	C/C	C/C	C/C	C/C	C/C	C/G	C/C	C/G	C/C	C/C	C/C	C/C	C/C	C/G	G/G	C/G	G/G	C/G	C/C	C/C	C/G	C/G	C/C	C/G	C/G	C/G	C/C	G/G	C/C	C/C	C/C	C/G	G/G	C/C	C/G	C/C	C/G	C/C	C/G	G/G	C/G	C/C	C/G
ST4.03ch01pos83654922.1	1	83654922	G/G	G/A	G/A	G/G	G/G	G/G	G/G	G/G	G/G	G/A	G/G	G/A	G/G	G/G	G/G	G/G	G/G	G/A	A/A	G/A	A/A	G/A	G/G	G/G	G/A	G/A	G/G	G/A	G/A	G/A	G/G	A/A	G/G	G/G	G/G	G/A	A/A	G/G	G/A	G/G	G/A	G/G	G/A	A/A	G/A	G/G	G/A
ST4.03ch01pos83723898.1	1	83723898	C/T	NA	C/C	C/T	C/T	C/C	C/T	C/T	C/C	C/C	C/T	C/C	C/T	C/C	C/T	C/T	C/T	C/C	C/T	C/C	C/C	C/C	C/T	C/T	C/C	C/C	C/C	C/C	C/C	C/C	C/C	C/C	C/C	C/T	C/T	C/C	C/C	C/C	C/C	C/T	C/C	C/C	C/C	C/T	C/C	C/T	C/C
ST4.03ch01pos83723916.1	1	83723916	T/A	NA	T/T	T/A	T/A	T/T	T/A	T/A	T/T	T/T	T/A	T/T	T/A	T/T	T/A	T/A	T/A	T/T	T/A	T/T	T/T	T/T	T/A	T/A	T/T	T/T	T/T	T/T	T/T	T/T	T/T	T/T	T/T	T/A	T/A	T/T	T/T	T/T	T/T	T/A	T/T	T/T	T/T	T/A	T/T	T/A	T/T
ST4.03ch01pos83723961.1	1	83723961	T/T	T/T	T/T	T/T	NA	T/A	T/A	T/T	T/T	T/T	T/T	T/T	T/A	T/A	T/A	T/A	T/T	T/T	T/T	T/A	T/T	T/T	T/A	T/A	T/T	T/T	T/A	T/A	T/A	T/T	T/T	T/T	T/A	T/T	T/T	T/A	T/T	T/T	T/A	T/T	T/T	T/T	T/T	T/T	T/T	T/A	T/T
ST4.03ch01pos83724018.1	1	83724018	A/G	A/G	A/G	A/G	A/G	A/G	A/A	A/G	G/G	A/G	A/G	A/G	A/A	A/G	A/A	A/A	A/G	A/G	A/G	A/G	G/G	A/G	NA	A/A	G/G	A/G	A/G	A/A	A/G	A/G	G/G	G/G	A/G	A/G	A/G	A/G	A/G	G/G	A/G	A/G	G/G	G/G	A/G	A/G	A/G	A/A	A/G
ST4.03ch01pos83724021.1	1	83724021	A/G	A/G	A/A	A/G	A/G	A/G	A/A	A/G	G/G	A/G	A/G	A/G	A/A	A/G	A/A	A/A	A/A	A/A	A/A	A/A	A/A	A/G	A/A	A/A	A/G	A/G	A/G	A/A	A/A	A/G	G/G	A/A	A/G	A/G	A/G	A/A	A/A	G/G	A/G	A/G	A/G	G/G	A/A	A/A	A/G	A/A	A/G
ST4.03ch01pos83724025.1	1	83724025	G/G	G/G	G/G	G/G	G/G	G/A	G/A	G/G	G/G	G/G	G/G	G/G	G/A	G/A	G/A	G/A	G/G	G/G	G/G	G/A	G/G	G/G	G/A	G/A	G/G	G/G	G/A	G/A	G/A	NA	G/G	G/G	G/A	G/G	G/G	G/A	G/G	G/G	G/A	G/G	G/G	G/G	G/G	G/G	G/G	G/A	G/G
ST4.03ch01pos84088791.1	1	84088791	T/C	NA	T/T	T/C	T/C	T/T	T/C	T/C	T/T	T/T	T/C	T/T	T/C	T/T	T/C	T/C	T/C	T/T	T/C	T/T	T/T	T/T	T/C	T/C	T/T	T/T	T/T	T/T	T/T	T/C	T/T	T/T	T/C	T/C	T/C	T/T	T/T	T/T	T/C	T/C	T/T	T/T	T/T	T/C	T/C	T/C	T/T
ST4.03ch01pos84088822.1	1	84088822	T/G	NA	T/T	T/G	T/G	T/T	T/G	T/G	T/T	T/T	T/G	T/T	T/G	T/T	T/G	T/G	T/G	T/T	T/G	T/T	T/T	T/T	T/G	T/G	T/T	T/T	T/T	T/T	T/T	T/G	T/T	T/T	T/G	T/G	T/G	T/T	T/T	T/T	T/G	T/G	T/T	T/T	T/T	T/G	T/G	T/G	T/T
ST4.03ch01pos84100920.1	1	84100920	T/T	T/A	A/A	T/T	T/A	A/A	T/A	T/A	T/A	T/A	T/T	T/A	T/A	A/A	T/A	T/A	T/A	A/A	T/A	A/A	NA	T/A	T/A	T/A	T/A	NA	A/A	A/A	A/A	T/A	T/A	A/A	T/T	T/A	T/A	A/A	T/A	T/A	T/T	T/T	T/A	T/A	A/A	T/A	T/A	T/A	T/A
ST4.03ch01pos84139224.1	1	84139224	G/T	G/T	G/G	G/T	G/T	G/G	G/G	G/G	G/T	G/T	G/T	G/T	G/G	G/G	G/G	G/G	G/G	G/G	G/G	G/G	G/G	G/T	G/G	G/G	G/T	G/G	G/G	G/G	G/G	G/G	G/T	G/G	G/T	G/G	G/G	G/G	G/G	G/T	G/G	G/G	G/T	G/T	G/G	G/G	G/T	G/G	G/T
ST4.03ch01pos84145690.1	1	84145690	G/G	G/G	A/A	G/G	G/G	A/A	A/G	G/G	G/G	G/G	G/G	G/G	A/G	A/A	G/G	A/G	G/G	A/A	G/G	A/A	NA	G/G	A/G	A/G	G/G	NA	A/A	A/A	A/A	A/G	G/G	NA	G/G	G/G	G/G	A/G	G/G	G/G	G/G	G/G	G/G	G/G	A/A	G/G	G/G	G/G	G/G
ST4.03ch01pos84247782.1	1	84247782	G/G	A/G	A/G	G/G	A/G	A/A	A/G	A/G	G/G	G/G	G/G	G/G	A/G	A/A	G/G	A/G	G/G	A/G	G/G	A/G	G/G	G/G	A/G	A/G	G/G	G/G	A/A	A/G	A/G	A/G	G/G	G/G	A/G	G/G	G/G	A/G	G/G	A/G	A/G	A/G	G/G	A/G	A/G	G/G	G/G	G/G	G/G
ST4.03ch01pos84453649.1	1	84453649	C/C	T/C	T/C	C/C	T/C	T/C	C/C	T/C	C/C	C/C	C/C	C/C	C/C	T/C	C/C	C/C	C/C	T/C	C/C	C/C	C/C	C/C	C/C	C/C	C/C	T/C	T/C	C/C	C/C	T/C	C/C	C/C	C/C	C/C	C/C	C/C	C/C	T/C	T/C	T/C	C/C	T/C	T/C	C/C	C/C	C/C	C/C
ST4.03ch01pos84456904.1	1	84456904	A/A	G/A	G/A	A/A	G/A	G/A	A/A	G/A	A/A	A/A	A/A	A/A	A/A	G/A	A/A	A/A	A/A	G/A	A/A	A/A	A/A	A/A	A/A	A/A	A/A	G/A	G/A	A/A	A/A	G/A	A/A	A/A	G/A	A/A	A/A	A/A	NA	G/A	G/A	G/A	A/A	G/A	G/A	A/A	A/A	A/A	A/A
ST4.03ch01pos84483075.1	1	84483075	A/G	A/A	G/G	A/G	A/G	G/G	A/G	G/G	G/G	A/G	A/G	A/G	A/G	G/G	A/G	NA	G/G	G/G	A/G	G/G	NA	NA	NA	A/G	A/G	NA	NA	G/G	G/G	A/G	G/G	G/G	NA	A/G	A/G	G/G	A/G	G/G	A/A	A/A	A/G	G/G	G/G	A/G	A/G	A/G	G/G
ST4.03ch01pos84483138.1	1	84483138	C/T	NA	C/C	C/T	C/T	C/C	C/T	C/C	C/C	C/C	C/T	C/C	C/T	C/C	C/T	NA	C/C	C/C	C/T	C/C	NA	C/C	NA	C/T	C/C	C/C	NA	C/C	C/C	NA	C/C	C/C	NA	C/T	C/T	C/C	C/C	C/C	T/T	T/T	C/C	C/C	C/C	C/T	C/C	C/T	C/C
ST4.03ch01pos84484031.1	1	84484031	T/C	NA	T/T	T/C	NA	T/T	T/C	T/T	T/T	T/T	T/C	T/T	T/C	T/T	T/C	T/C	NA	T/T	NA	T/T	NA	T/T	NA	T/C	T/T	T/T	T/T	T/T	T/T	T/C	T/T	T/T	T/C	T/C	T/C	T/T	T/T	T/T	NA	C/C	T/T	T/T	T/T	T/C	NA	T/C	T/T
ST4.03ch01pos84552632.1	1	84552632	A/A	A/A	A/A	A/A	A/A	A/A	A/A	A/A	A/A	A/A	A/A	A/A	A/A	A/A	A/A	A/A	A/A	A/A	A/A	A/A	A/A	A/A	A/A	A/A	A/A	A/A	A/A	A/A	A/A	A/A	A/A	A/A	A/A	A/A	A/A	A/A	A/A	A/A	A/A	A/A	A/A	A/A	A/A	A/A	A/A	A/A	A/A
ST4.03ch01pos84605434.1	1	84605434	T/A	T/A	T/A	T/A	T/A	T/A	T/A	T/A	A/A	T/A	T/A	T/A	T/A	T/A	T/A	T/A	T/A	T/A	T/A	T/A	T/A	T/A	T/A	T/A	T/A	T/A	T/A	A/A	T/A	T/A	A/A	T/A	T/A	T/A	T/A	T/A	T/A	T/A	T/T	T/T	T/A	T/A	T/A	T/A	T/A	T/A	A/A
ST4.03ch01pos84638236.1	1	84638236	T/C	T/C	T/C	T/C	T/C	T/C	T/C	T/C	C/C	T/C	T/C	T/C	T/C	T/C	T/C	T/C	T/C	T/C	T/C	T/C	T/C	T/C	T/C	T/C	T/C	T/C	T/C	C/C	T/C	T/C	C/C	T/C	T/T	T/C	T/C	T/C	T/C	T/C	T/T	T/T	T/C	T/C	T/C	T/C	T/C	T/C	C/C
ST4.03ch01pos84638261.1	1	84638261	G/A	G/A	G/A	G/A	G/A	G/A	G/A	G/A	A/A	G/A	G/A	G/A	G/A	G/A	G/A	G/A	G/A	G/A	G/A	G/A	G/A	G/A	G/A	G/A	G/A	G/A	G/A	A/A	G/A	G/A	A/A	G/A	G/G	G/A	G/A	G/A	G/A	G/A	G/G	G/G	G/A	G/A	G/A	G/A	G/A	G/A	A/A
ST4.03ch01pos84638273.1	1	84638273	C/T	C/T	C/T	C/T	C/T	C/T	C/T	C/T	T/T	C/T	C/T	C/T	C/T	C/T	C/T	C/T	C/T	C/T	C/T	C/T	C/T	C/T	C/T	C/T	C/T	C/T	C/T	T/T	C/T	C/T	T/T	C/T	C/T	C/T	C/T	C/T	C/T	C/T	C/C	C/C	C/T	C/T	C/T	C/T	C/T	C/T	T/T
ST4.03ch01pos84679012.1	1	84679012	G/G	NA	G/G	G/G	G/G	G/G	G/G	G/G	G/G	G/A	G/G	G/A	G/G	G/G	G/G	G/G	G/G	G/G	G/G	G/A	G/A	G/A	G/G	G/G	G/A	NA	G/G	G/G	G/A	G/A	G/G	G/A	G/G	G/G	G/G	G/A	G/A	G/G	G/G	G/G	G/A	G/G	G/G	G/G	G/A	G/G	G/G
ST4.03ch01pos84679022.1	1	84679022	T/A	T/A	T/A	T/A	T/A	T/A	T/A	T/A	A/A	T/A	T/A	T/A	T/A	T/A	T/A	T/A	T/A	T/A	T/A	T/A	T/A	T/A	T/A	T/A	T/A	T/A	T/A	A/A	T/A	T/A	A/A	T/A	NA	T/A	T/A	T/A	T/A	T/A	T/T	T/T	T/A	T/A	T/A	T/A	T/A	T/A	A/A
ST4.03ch01pos84679054.1	1	84679054	A/T	A/T	A/T	A/T	A/T	A/T	A/T	A/T	T/T	A/T	A/T	A/T	A/T	A/T	A/T	A/T	A/T	A/T	A/T	A/T	A/T	A/T	A/T	A/T	A/T	A/T	A/T	T/T	A/T	A/T	T/T	A/T	A/A	A/T	A/T	A/T	A/T	A/T	A/A	A/A	A/T	A/T	A/T	A/T	A/T	A/T	T/T
ST4.03ch01pos84679069.1	1	84679069	G/T	G/T	G/T	G/T	G/T	G/T	G/T	G/T	T/T	G/T	G/T	G/T	G/T	G/T	G/T	G/T	G/T	G/T	G/T	G/T	G/T	G/T	G/T	G/T	G/T	G/T	G/T	T/T	G/T	G/T	T/T	G/T	G/T	G/T	G/T	G/T	G/T	G/T	G/G	G/G	G/T	G/T	G/T	G/T	G/T	G/T	T/T
ST4.03ch01pos84679070.1	1	84679070	G/T	NA	G/G	G/T	NA	G/G	G/T	G/G	G/G	G/G	G/T	G/G	G/T	G/G	G/T	G/T	G/G	G/G	G/T	G/G	G/G	G/G	G/T	G/T	G/G	G/G	G/G	G/G	G/G	G/G	G/G	G/G	G/T	G/T	G/T	G/G	G/G	G/G	G/T	G/T	G/G	G/G	G/G	G/T	G/G	G/T	G/G
ST4.03ch01pos84679071.1	1	84679071	A/T	NA	A/A	A/T	NA	A/A	A/T	A/A	A/A	A/A	A/T	A/A	A/T	A/A	A/T	A/T	A/A	A/A	A/T	A/A	A/A	A/A	A/T	A/T	A/A	A/A	A/A	A/A	A/A	A/A	A/A	A/A	A/T	A/T	A/T	A/A	A/A	A/A	A/T	A/T	A/A	A/A	A/A	A/T	A/A	A/T	A/A
ST4.03ch01pos84680596.1	1	84680596	T/T	NA	A/A	T/T	A/T	A/A	T/T	A/A	NA	A/A	T/T	A/A	T/T	A/A	T/T	T/T	A/A	A/A	T/T	A/A	A/A	A/A	T/T	T/T	A/A	A/A	A/A	NA	A/A	A/T	NA	A/A	A/T	T/T	T/T	A/T	A/A	A/A	A/T	A/T	A/A	A/A	A/A	T/T	A/T	T/T	NA
ST4.03ch01pos84902316.1	1	84902316	T/T	NA	C/T	T/T	C/T	C/C	C/T	C/T	C/T	C/T	T/T	C/T	C/T	C/C	NA	NA	T/T	NA	T/T	C/T	NA	NA	C/T	C/C	C/T	NA	C/C	C/T	C/T	C/T	C/T	T/T	NA	C/T	C/T	C/T	T/T	C/T	NA	C/T	C/T	C/T	C/T	T/T	C/T	C/T	T/T
ST4.03ch01pos84902331.1	1	84902331	C/T	NA	C/T	C/T	C/T	C/C	C/C	C/T	C/T	C/T	C/T	C/T	C/C	C/C	C/C	C/C	T/T	NA	C/C	C/T	NA	NA	C/C	C/C	C/T	NA	C/C	C/T	C/T	C/T	C/T	T/T	C/C	C/C	C/C	C/T	C/T	C/T	C/C	C/C	NA	NA	C/T	C/C	C/T	C/C	T/T
ST4.03ch01pos84920879.1	1	84920879	G/C	G/C	G/C	G/C	G/C	G/G	G/G	G/C	G/C	G/C	G/C	G/C	G/G	G/G	G/G	G/G	C/C	G/C	G/G	G/C	C/C	G/C	G/G	G/G	G/C	G/C	G/G	G/C	G/C	G/C	G/C	C/C	G/G	G/G	G/G	G/C	G/C	G/C	G/G	G/G	G/C	G/C	G/C	G/G	G/C	G/G	C/C
ST4.03ch01pos84920891.1	1	84920891	C/T	C/T	C/T	C/T	C/T	C/C	C/C	C/T	C/T	C/T	C/T	C/T	C/C	C/C	C/C	C/C	T/T	C/T	C/C	C/T	T/T	C/T	C/C	C/C	C/T	C/T	C/C	C/T	C/T	C/T	C/T	T/T	C/C	C/C	C/C	C/T	C/T	C/T	C/C	C/C	C/T	C/T	C/T	C/C	C/T	C/C	T/T
ST4.03ch01pos85066647.1	1	85066647	A/A	G/A	G/A	A/A	G/A	G/G	G/A	G/A	G/A	G/A	A/A	G/A	G/A	G/G	G/A	G/A	A/A	G/A	G/A	G/A	A/A	G/A	G/A	G/A	G/A	G/A	G/G	G/A	G/A	G/A	G/A	A/A	G/G	G/A	G/A	G/A	G/A	G/A	G/G	G/A	G/A	G/A	G/A	G/A	G/A	G/A	A/A
ST4.03ch01pos85240329.1	1	85240329	C/C	C/C	C/C	C/C	C/C	C/C	NA	C/C	C/C	C/C	C/C	C/C	C/C	C/C	C/C	C/C	C/C	C/C	C/C	C/C	NA	C/C	C/C	C/C	C/C	C/C	C/C	C/C	C/C	C/C	C/C	C/C	NA	C/C	NA	C/C	C/C	C/C	C/C	C/C	C/C	C/C	C/C	C/C	C/C	C/C	C/C
ST4.03ch01pos85336232.1	1	85336232	C/C	C/C	C/C	C/C	C/C	C/C	C/C	C/C	C/C	C/C	C/C	C/C	C/C	C/C	C/C	C/C	C/C	C/C	C/C	C/C	C/C	C/C	C/C	C/C	C/C	C/C	C/C	C/C	C/C	C/C	C/C	C/C	C/C	C/C	C/C	C/C	C/C	C/C	C/C	C/C	C/C	C/C	C/C	C/C	C/C	C/C	C/C
ST4.03ch01pos85336246.1	1	85336246	T/T	T/T	T/T	T/T	T/T	T/T	T/T	T/T	T/T	T/T	T/T	T/T	T/T	T/T	T/T	T/T	T/T	T/T	T/T	T/T	T/T	T/T	T/T	T/T	T/C	T/T	T/T	T/T	T/T	T/C	T/T	T/T	T/C	T/T	T/T	T/T	T/C	T/T	T/C	T/T	T/C	T/T	T/T	T/T	T/T	T/T	T/T
ST4.03ch01pos85505152.1	1	85505152	C/C	NA	T/T	NA	T/C	T/T	NA	T/T	C/C	NA	C/C	NA	T/C	T/T	C/C	T/C	T/C	T/T	C/C	NA	T/C	NA	T/C	T/C	T/C	T/C	NA	T/T	NA	T/C	C/C	T/C	NA	C/C	C/C	T/C	T/C	T/T	NA	T/C	T/C	T/T	T/T	T/C	C/C	C/C	T/T
ST4.03ch01pos85612883.1	1	85612883	NA	NA	A/A	C/C	C/C	A/C	A/C	A/C	C/C	C/C	C/C	C/C	NA	A/C	C/C	A/C	A/C	A/A	C/C	NA	NA	C/C	NA	A/C	A/C	A/C	A/C	NA	NA	A/C	C/C	NA	NA	C/C	C/C	A/C	A/C	C/C	NA	A/C	NA	C/C	A/A	A/C	C/C	C/C	A/C
ST4.03ch01pos85612886.1	1	85612886	NA	NA	C/C	C/A	NA	C/A	C/A	C/A	A/A	A/A	C/A	A/A	C/C	C/A	NA	C/C	C/C	C/C	C/C	C/C	NA	NA	C/C	C/C	NA	C/A	C/A	C/C	C/C	NA	A/A	C/C	NA	C/A	C/A	C/C	C/C	A/A	NA	C/C	C/A	A/A	C/C	C/C	NA	C/A	C/A
ST4.03ch01pos85612905.1	1	85612905	NA	NA	A/A	A/G	NA	A/G	A/G	A/G	G/G	G/G	A/G	G/G	A/A	A/G	NA	A/A	A/A	A/A	A/A	A/A	NA	NA	A/A	A/A	A/G	A/G	A/G	A/A	A/A	NA	G/G	A/A	NA	A/G	A/G	A/A	A/A	G/G	NA	A/A	A/G	G/G	A/A	A/A	NA	A/G	A/G
ST4.03ch01pos85718333.1	1	85718333	C/C	NA	NA	NA	C/C	NA	C/C	C/C	C/C	C/C	C/C	C/C	C/C	C/C	NA	C/C	C/C	C/T	C/C	C/C	NA	NA	NA	C/C	NA	NA	C/C	C/T	C/T	C/C	C/C	C/T	C/C	C/C	C/C	C/T	C/T	C/C	NA	C/C	C/C	C/C	C/T	C/C	C/C	C/C	C/T
ST4.03ch01pos85834027.1	1	85834027	T/T	T/T	T/T	T/T	T/T	T/T	T/T	T/T	T/T	T/T	T/T	T/T	T/T	T/T	T/T	T/T	T/T	T/T	T/T	T/T	T/T	T/T	T/T	T/T	T/T	T/T	T/T	T/T	T/T	T/T	T/T	T/T	T/T	T/T	T/T	T/T	T/T	T/T	T/T	T/T	T/T	T/T	T/T	T/T	T/T	T/T	T/T
ST4.03ch01pos85870711.1	1	85870711	A/A	A/A	A/A	A/A	A/A	A/A	A/A	A/A	A/A	A/A	A/A	A/A	A/A	A/A	A/A	A/A	A/A	A/A	A/T	A/A	A/A	A/A	A/A	A/A	A/A	A/A	A/A	A/A	A/A	A/A	A/A	A/A	A/T	A/A	A/A	A/A	A/A	A/A	A/T	A/A	A/A	A/A	A/A	A/A	A/A	A/A	A/A
ST4.03ch01pos85899880.1	1	85899880	C/C	C/C	C/C	C/C	C/C	C/C	C/C	NA	C/C	C/C	C/C	C/C	C/C	C/C	NA	C/C	C/C	C/C	A/A	C/C	C/C	C/C	C/C	C/C	C/A	C/C	C/C	C/C	C/C	C/A	C/C	C/C	C/A	NA	C/C	C/C	C/A	C/C	C/C	C/C	C/A	C/C	C/C	C/C	C/C	NA	C/C
ST4.03ch01pos85899917.1	1	85899917	C/C	C/C	C/C	C/C	C/C	C/C	C/C	NA	C/C	C/C	C/C	C/C	C/C	C/C	NA	C/C	C/C	C/C	T/T	C/C	C/C	C/C	C/C	C/C	C/T	C/C	C/C	C/C	C/C	C/T	C/C	C/C	C/T	NA	C/C	C/C	C/T	C/C	C/C	C/C	C/T	C/C	C/C	C/C	C/C	NA	C/C
ST4.03ch01pos85899932.1	1	85899932	C/C	C/C	C/C	C/C	C/C	C/C	C/C	NA	C/C	C/C	C/C	C/C	C/C	C/C	NA	C/C	C/C	C/C	A/A	C/C	C/C	C/C	C/C	C/C	C/A	C/C	C/C	C/C	C/C	C/A	C/C	C/C	C/A	NA	C/C	C/C	C/A	C/C	C/C	C/C	C/A	C/C	C/C	C/C	C/C	NA	C/C
ST4.03ch01pos86139749.1	1	86139749	T/T	T/A	T/A	T/T	T/A	T/T	T/A	T/A	T/T	NA	T/T	NA	T/T	T/T	T/A	T/A	A/A	T/A	T/T	T/T	T/A	T/A	T/A	T/T	A/A	T/A	T/T	T/A	T/A	T/A	T/T	T/A	T/A	T/T	T/T	T/A	T/A	T/T	A/A	T/T	A/A	T/T	T/A	T/A	T/A	T/A	T/A
ST4.03ch01pos86139761.1	1	86139761	C/C	C/C	C/C	C/C	C/C	C/C	C/C	C/C	C/C	NA	C/C	NA	C/C	C/C	C/C	NA	C/C	C/C	C/C	C/C	C/C	C/C	C/C	C/C	C/C	C/C	C/C	C/C	C/C	C/T	C/C	C/C	C/C	C/C	C/C	C/C	C/T	C/C	C/C	C/C	C/C	C/C	C/C	C/C	C/C	C/C	C/C
ST4.03ch01pos86139794.1	1	86139794	A/A	A/T	A/T	A/A	A/T	A/A	A/T	A/T	A/A	NA	A/A	NA	A/A	A/A	A/T	A/T	T/T	A/T	A/A	A/A	A/T	A/T	A/T	A/A	T/T	A/T	A/A	A/T	A/T	A/T	A/A	A/T	A/T	A/A	A/A	A/T	A/T	A/A	T/T	A/A	T/T	A/A	A/T	A/T	A/T	A/T	A/T
ST4.03ch01pos86307128.1	1	86307128	G/G	NA	G/A	G/G	G/A	G/G	G/A	G/A	G/A	G/G	G/G	G/G	G/G	G/G	G/A	G/G	G/A	G/A	G/A	G/A	A/A	G/A	G/G	G/G	G/G	G/A	G/G	G/A	G/A	G/A	G/A	A/A	NA	G/A	G/A	G/A	G/A	G/G	A/A	G/G	G/G	G/G	G/A	G/A	G/G	G/A	G/A
ST4.03ch01pos86312904.1	1	86312904	G/G	NA	G/A	G/G	G/A	G/G	G/A	G/A	G/A	G/G	G/G	G/G	G/G	G/G	NA	G/G	G/A	G/A	G/A	G/A	A/A	NA	G/G	G/G	G/A	G/A	G/G	G/A	G/A	G/A	G/A	A/A	NA	G/A	G/A	G/A	A/A	G/G	A/A	G/G	G/A	G/G	G/A	G/A	G/G	G/A	G/A
ST4.03ch01pos86312912.1	1	86312912	A/A	NA	A/A	A/A	A/A	A/A	A/A	A/A	A/G	A/A	A/A	A/A	A/A	A/A	A/A	A/A	A/A	A/A	A/A	A/G	A/G	A/A	A/A	A/A	A/G	A/G	A/A	A/A	A/G	A/A	A/G	A/G	NA	A/G	A/G	A/G	A/G	A/A	A/A	A/A	A/G	A/A	A/A	A/A	A/A	A/A	A/A
ST4.03ch01pos86353386.1	1	86353386	C/T	C/T	C/T	C/T	C/T	C/T	C/T	T/T	C/T	C/C	C/T	C/C	C/T	C/T	T/T	C/T	C/T	C/T	T/T	C/T	T/T	C/T	C/T	C/T	C/T	C/T	C/T	C/T	C/T	C/T	C/T	T/T	C/T	T/T	T/T	C/T	C/T	C/T	T/T	C/T	C/T	C/T	C/T	C/T	NA	T/T	C/T
ST4.03ch01pos86372031.1	1	86372031	G/A	NA	G/A	G/A	G/A	G/A	G/A	A/A	G/A	G/G	NA	G/G	G/A	G/A	A/A	G/A	G/A	G/A	G/A	G/G	NA	G/G	NA	G/A	G/A	G/A	G/A	G/A	G/A	NA	G/A	G/A	G/G	A/A	A/A	G/A	G/A	G/A	G/A	G/A	G/A	G/A	G/A	G/A	NA	A/A	G/A
ST4.03ch01pos86372035.1	1	86372035	C/T	NA	C/T	C/T	C/T	C/T	C/T	T/T	C/T	C/C	NA	C/C	C/T	C/T	T/T	C/T	C/T	C/T	T/T	C/T	T/T	NA	NA	C/T	NA	C/T	C/T	C/T	C/T	C/T	C/T	T/T	NA	T/T	T/T	NA	NA	C/T	T/T	C/T	C/T	C/T	C/T	C/T	C/T	T/T	C/T
ST4.03ch01pos86531747.1	1	86531747	NA	NA	C/C	NA	C/A	NA	C/A	C/A	C/C	C/C	C/A	C/C	C/A	C/A	A/A	NA	C/C	C/C	C/A	C/A	C/C	NA	NA	NA	C/C	C/C	NA	C/C	NA	C/A	C/C	C/A	C/C	C/A	C/A	C/A	C/A	C/A	NA	C/A	C/C	C/A	C/C	C/C	C/A	A/A	C/C
ST4.03ch01pos86535788.1	1	86535788	C/T	NA	C/C	C/T	C/T	C/T	C/T	C/T	C/C	C/C	C/T	C/C	C/T	C/T	T/T	C/T	C/C	C/C	C/T	C/T	C/T	C/T	C/T	C/T	C/C	C/C	C/T	C/C	NA	C/T	C/C	C/T	C/C	C/T	C/T	C/T	C/T	C/T	C/T	C/T	C/C	C/T	C/C	C/C	C/T	T/T	C/C
ST4.03ch01pos86535806.1	1	86535806	T/A	NA	T/T	T/A	T/A	T/A	T/A	T/A	T/T	T/T	T/A	T/T	T/A	T/A	A/A	T/A	T/T	T/T	T/A	T/A	T/A	T/A	T/A	T/A	T/T	T/T	T/A	T/T	NA	T/A	T/T	T/A	T/T	T/A	T/A	T/A	T/A	T/A	T/A	T/A	T/T	T/A	T/T	T/T	T/A	A/A	T/T
ST4.03ch01pos86586179.1	1	86586179	C/T	C/T	C/T	C/T	C/T	C/T	C/T	C/C	C/T	T/T	C/T	T/T	C/T	C/T	C/C	C/T	C/T	C/T	C/T	T/T	C/T	NA	C/T	C/T	C/T	C/T	C/T	C/T	C/T	C/T	C/T	C/T	T/T	C/C	C/C	C/T	C/T	C/T	C/T	C/T	C/T	C/T	C/T	C/T	C/T	C/C	C/T
ST4.03ch01pos86911161.1	1	86911161	C/T	C/T	C/C	C/T	C/T	C/C	C/T	C/C	C/T	C/T	C/T	C/T	C/C	C/C	C/T	C/C	C/T	C/C	C/T	C/C	C/C	C/T	C/C	C/C	C/T	C/C	C/C	C/C	C/C	C/T	C/T	C/C	T/T	C/C	C/C	C/C	C/T	C/T	C/T	C/C	C/T	C/T	C/C	C/T	C/T	C/T	C/T
ST4.03ch01pos86996643.1	1	86996643	G/G	G/G	G/G	G/G	G/G	G/G	G/A	G/G	G/G	G/G	G/G	G/G	G/G	G/G	G/A	G/G	G/G	G/G	G/G	G/G	G/G	G/G	G/G	G/G	G/A	G/G	G/G	G/G	G/G	G/G	G/G	G/G	A/A	G/G	G/G	G/G	G/G	G/G	G/A	G/G	G/A	G/G	G/G	G/G	G/G	G/A	G/G
ST4.03ch01pos87009602.1	1	87009602	G/G	G/G	G/G	G/G	G/A	G/G	G/A	G/G	G/G	G/G	G/G	G/G	G/G	G/G	NA	G/G	G/G	G/G	G/G	G/G	G/G	G/G	G/G	G/G	G/A	G/G	G/G	G/G	G/G	G/G	G/G	G/G	G/A	G/G	G/G	G/G	G/G	G/G	NA	G/G	G/A	G/G	G/G	G/G	G/G	G/A	G/G
ST4.03ch01pos87009607.1	1	87009607	C/C	C/C	C/C	C/C	C/T	C/C	C/T	C/C	C/C	C/C	C/C	C/C	C/C	C/C	NA	C/C	C/C	C/C	C/C	C/C	C/C	C/C	C/C	C/C	C/T	C/C	C/C	C/C	C/C	C/C	C/C	C/C	C/T	C/C	C/C	C/C	C/C	C/C	C/T	C/C	C/T	C/C	C/C	C/C	C/C	C/T	C/C
ST4.03ch01pos87009641.1	1	87009641	T/T	T/T	T/T	T/T	T/C	T/T	T/C	T/T	T/T	T/T	T/T	T/T	T/T	T/T	T/C	T/T	T/T	T/T	T/T	T/T	T/T	T/T	T/T	T/T	T/C	T/T	T/T	T/T	T/T	T/T	T/T	T/T	T/C	T/T	T/T	T/T	T/T	T/T	T/C	T/T	T/C	T/T	T/T	T/T	T/T	T/C	T/T
ST4.03ch01pos87009647.1	1	87009647	C/C	C/C	C/C	C/C	C/T	C/C	C/T	C/C	C/C	C/C	C/C	C/C	C/C	C/C	C/T	C/C	C/C	C/C	C/C	C/C	C/C	C/C	C/C	C/C	C/T	C/C	C/C	C/C	C/C	C/C	C/C	C/C	C/T	C/C	C/C	C/C	C/C	C/C	C/T	C/C	C/T	C/C	C/C	C/C	C/C	C/T	C/C
ST4.03ch01pos87009655.1	1	87009655	T/C	NA	T/C	T/C	T/C	T/C	T/C	T/C	T/C	T/C	T/C	T/C	T/C	T/C	T/C	T/C	T/C	T/C	NA	T/C	NA	T/C	T/C	T/C	T/C	T/C	T/C	T/C	T/C	T/C	T/C	T/C	T/C	T/C	T/C	T/C	T/C	T/C	T/C	T/C	T/C	T/C	T/C	T/C	T/C	T/C	T/C
ST4.03ch01pos87009656.1	1	87009656	G/A	NA	G/A	G/A	G/A	G/A	G/A	G/A	G/A	G/A	G/A	G/A	G/A	G/A	G/A	G/A	G/A	G/A	NA	G/A	NA	G/A	G/A	G/A	G/A	G/A	G/A	G/A	G/A	G/A	G/A	G/A	G/A	G/A	G/A	G/A	G/A	G/A	G/A	G/A	G/A	G/A	G/A	G/A	G/A	G/A	G/A
ST4.03ch01pos87020578.1	1	87020578	A/A	A/A	A/A	A/A	A/A	A/A	A/T	A/A	A/A	A/A	A/A	A/A	A/A	A/A	A/T	A/A	A/A	A/A	A/T	A/A	A/A	A/A	A/A	A/A	A/T	A/A	A/A	A/A	A/A	A/T	A/A	A/A	T/T	A/A	A/A	A/A	NA	A/A	A/T	A/A	A/T	A/A	A/A	A/T	A/A	A/T	A/A
ST4.03ch01pos87020587.1	1	87020587	C/C	C/C	C/C	C/C	C/C	C/C	C/C	C/C	C/C	C/C	C/C	C/C	C/C	C/C	C/C	C/C	C/C	C/C	C/T	C/C	C/C	C/C	C/C	C/C	C/C	C/C	C/C	C/C	C/C	C/C	C/C	C/C	C/C	C/C	C/C	C/C	C/C	C/C	C/C	C/C	C/C	C/C	C/C	C/C	C/C	C/C	C/C
ST4.03ch01pos87022635.1	1	87022635	C/C	C/C	C/C	C/C	C/C	C/C	C/T	C/C	C/C	C/C	C/C	C/C	C/C	C/C	C/T	C/C	C/C	C/C	C/T	C/C	C/C	C/C	C/C	C/C	C/T	C/C	C/C	C/C	C/C	C/T	C/C	C/C	T/T	C/C	C/C	C/C	C/C	C/C	NA	C/C	C/T	C/C	C/C	C/T	C/C	C/T	C/C
ST4.03ch01pos87024261.1	1	87024261	G/G	G/G	G/G	G/G	G/G	G/G	G/T	G/G	G/G	G/G	G/G	G/G	G/G	G/G	G/T	G/G	G/G	G/G	G/G	G/G	G/G	G/G	G/G	G/G	G/T	G/G	G/G	G/G	G/G	G/G	G/G	G/G	T/T	G/G	G/G	G/G	G/G	G/G	G/T	G/G	G/T	G/G	G/G	G/G	G/G	G/T	G/G
ST4.03ch01pos87253081.1	1	87253081	G/G	G/G	G/G	G/G	G/G	G/G	G/G	G/G	G/G	G/G	G/G	G/G	G/G	G/G	G/G	G/G	G/G	G/G	G/G	G/G	G/G	G/G	G/G	G/G	G/A	G/G	G/G	G/G	G/G	NA	G/G	G/G	G/A	G/G	G/G	G/G	G/G	G/G	G/G	G/G	G/A	G/G	G/G	G/A	G/G	G/G	G/G
ST4.03ch01pos87253093.1	1	87253093	A/A	A/A	A/A	A/A	A/A	A/A	A/A	A/A	A/A	A/A	A/A	A/A	A/A	A/A	A/A	A/A	A/A	A/A	A/A	A/A	A/A	A/A	A/A	A/A	A/A	A/A	A/A	A/A	A/A	A/A	A/A	A/A	A/A	A/A	A/A	A/A	A/A	A/A	A/A	A/A	A/A	A/A	A/A	A/A	A/A	A/A	A/A
ST4.03ch01pos87253132.1	1	87253132	T/T	T/T	T/T	T/T	T/T	T/T	T/T	T/T	T/T	T/T	T/T	T/T	T/T	T/T	T/T	T/T	T/T	T/T	T/T	T/T	T/T	T/T	T/T	T/T	T/A	T/T	T/T	T/T	T/T	NA	T/T	T/T	T/A	T/T	T/T	T/T	T/T	T/T	T/T	T/T	T/A	T/T	T/T	T/A	T/T	T/T	T/T
ST4.03ch01pos87362752.1	1	87362752	A/A	A/A	A/A	A/A	A/A	A/A	A/A	A/A	A/A	A/A	A/A	A/A	A/A	A/A	NA	A/A	A/A	A/A	A/C	A/A	NA	A/A	A/A	A/A	A/C	A/A	A/A	A/A	A/A	A/C	A/A	A/A	NA	A/A	A/A	A/A	A/C	A/A	A/C	A/A	A/C	A/A	A/A	A/C	A/A	A/A	A/A
ST4.03ch01pos87480169.1	1	87480169	C/C	T/C	T/C	C/C	C/C	T/C	T/C	C/C	C/C	T/C	C/C	T/C	T/C	T/C	C/C	T/C	C/C	T/C	T/C	T/T	T/C	T/C	T/C	T/C	C/C	T/C	T/C	T/C	T/C	T/C	C/C	T/C	T/C	C/C	C/C	T/C	T/C	C/C	C/C	T/C	C/C	C/C	T/C	T/C	T/C	C/C	C/C
ST4.03ch01pos87654123.1	1	87654123	G/G	G/A	G/G	G/G	G/G	G/G	G/G	G/G	G/G	G/A	G/G	G/A	G/G	G/G	NA	G/G	G/G	G/G	NA	G/G	G/G	G/A	G/G	G/G	G/A	G/A	G/G	G/G	G/G	G/G	G/G	G/G	G/A	NA	NA	G/G	G/G	G/G	G/G	G/G	G/A	G/G	G/G	G/A	G/A	NA	G/G
ST4.03ch01pos87656019.1	1	87656019	T/T	A/T	A/T	T/T	T/T	T/T	T/T	T/T	T/T	A/T	T/T	A/T	T/T	T/T	NA	T/T	T/T	A/T	NA	A/T	A/T	A/T	T/T	T/T	A/T	A/T	T/T	T/T	A/T	A/T	T/T	A/T	A/A	NA	NA	A/T	A/T	T/T	T/T	A/A	A/T	T/T	A/T	A/T	A/T	NA	T/T
ST4.03ch01pos87665441.1	1	87665441	C/T	C/T	C/C	C/T	C/T	C/C	C/T	C/C	C/T	C/T	C/T	C/T	C/T	C/C	T/T	C/T	C/C	C/C	T/T	C/C	NA	C/T	C/T	C/T	C/T	C/T	C/C	C/C	C/C	C/T	C/T	C/C	C/T	T/T	T/T	C/C	C/C	C/T	C/T	C/T	C/T	C/T	C/C	C/T	C/T	T/T	C/C
ST4.03ch01pos87665450.1	1	87665450	G/C	G/C	G/C	G/C	G/C	G/C	G/C	C/C	G/C	G/C	G/C	G/C	G/C	G/C	C/C	G/C	G/C	G/C	C/C	G/G	NA	G/C	G/C	G/C	G/C	NA	G/C	G/C	G/C	G/C	G/C	G/C	C/C	C/C	C/C	G/C	G/C	G/C	C/C	G/C	G/C	G/C	G/C	C/C	G/C	C/C	G/C
ST4.03ch01pos87665468.1	1	87665468	A/A	NA	A/G	A/A	A/A	A/G	A/A	G/G	A/A	A/A	A/A	A/A	A/A	A/G	A/A	A/A	A/G	A/G	A/A	A/A	NA	NA	A/A	A/A	A/A	NA	A/G	A/G	A/G	A/G	A/A	A/G	A/G	A/A	A/A	A/G	A/G	A/A	A/G	A/A	A/A	A/A	A/G	A/G	A/A	A/A	A/G
ST4.03ch01pos87840864.1	1	87840864	A/A	C/A	C/C	A/A	A/A	C/A	C/A	C/A	A/A	A/A	A/A	A/A	C/A	C/A	C/A	C/A	C/C	C/C	A/A	C/C	C/C	NA	C/A	C/A	C/A	C/A	C/A	C/C	C/C	C/A	A/A	C/C	A/A	A/A	A/A	C/C	NA	A/A	C/A	C/A	C/A	A/A	C/C	C/A	NA	C/A	C/A
ST4.03ch01pos87850391.1	1	87850391	T/T	C/T	C/C	T/T	NA	C/T	C/T	C/T	T/T	C/T	T/T	C/T	C/T	C/T	C/T	C/T	C/C	C/C	C/T	C/C	C/C	C/T	C/T	C/T	C/T	C/T	C/T	C/C	C/C	C/T	T/T	C/C	C/T	T/T	T/T	C/C	C/T	T/T	C/T	C/T	C/T	T/T	C/C	C/T	C/T	C/T	C/T
ST4.03ch01pos87871234.1	1	87871234	A/A	NA	G/G	A/A	NA	G/A	G/A	G/A	A/A	G/A	A/A	G/A	G/A	G/A	G/A	NA	G/G	G/G	G/A	G/A	NA	NA	NA	NA	NA	NA	G/A	G/G	G/G	G/A	A/A	NA	NA	NA	A/A	G/A	G/A	A/A	NA	G/A	G/A	A/A	G/G	G/G	G/A	G/A	G/A
ST4.03ch01pos87926492.1	1	87926492	C/C	C/G	C/C	C/C	C/C	C/C	C/C	C/C	C/C	C/G	C/C	C/G	C/C	C/C	C/C	C/C	C/C	C/C	C/G	C/C	C/C	C/G	C/C	C/C	C/C	C/G	C/C	C/C	C/C	C/C	C/C	C/C	C/G	C/C	C/C	C/C	C/C	C/C	C/C	C/C	C/C	C/C	C/C	C/C	C/G	C/C	C/C
ST4.03ch01pos87926536.1	1	87926536	C/C	C/T	C/C	C/C	C/C	C/C	C/C	C/C	C/C	C/T	C/C	C/T	C/C	C/C	C/C	C/C	C/C	C/C	C/T	C/C	C/C	C/T	C/C	C/C	C/C	C/T	C/C	C/C	C/C	C/C	C/C	C/C	C/T	C/C	C/C	C/C	C/C	C/C	C/C	C/C	C/C	C/C	C/C	C/C	C/T	C/C	C/C
ST4.03ch01pos87975335.1	1	87975335	C/C	C/C	NA	C/C	C/C	C/C	C/C	C/C	C/C	C/C	C/C	C/C	C/C	C/C	C/C	C/C	NA	NA	C/C	C/C	C/C	C/C	C/C	C/C	C/C	C/C	C/C	NA	C/C	C/T	C/C	C/C	C/C	C/C	C/C	C/C	C/C	C/C	NA	C/C	C/C	C/C	NA	NA	C/C	C/C	C/C
ST4.03ch01pos88067980.1	1	88067980	T/T	A/T	A/A	T/T	T/T	T/T	A/T	A/T	T/T	A/T	T/T	A/T	T/T	T/T	NA	T/T	A/T	A/A	A/T	T/T	A/A	A/T	T/T	T/T	T/T	A/T	T/T	A/T	A/T	A/T	T/T	A/A	NA	T/T	T/T	A/T	A/T	T/T	A/A	A/T	T/T	T/T	A/A	A/A	A/T	A/T	A/T
ST4.03ch01pos88093411.1	1	88093411	T/T	NA	G/G	T/T	G/T	T/T	G/T	G/T	T/T	G/T	T/T	G/T	T/T	T/T	G/T	T/T	G/T	G/G	G/T	G/T	G/G	G/T	T/T	T/T	G/T	G/T	T/T	G/T	G/T	G/T	T/T	G/G	G/G	T/T	T/T	G/T	G/G	T/T	G/G	G/T	G/T	T/T	G/G	G/G	G/T	G/T	G/T
ST4.03ch01pos88127291.1	1	88127291	C/C	NA	C/C	C/C	C/C	C/C	C/C	C/C	C/C	C/C	C/C	C/C	C/C	C/C	C/C	C/C	C/C	C/C	C/C	NA	NA	NA	C/C	C/C	C/T	C/C	C/C	C/C	NA	NA	C/C	C/T	C/T	C/C	C/C	C/T	C/T	C/C	C/C	C/C	C/T	C/C	C/C	C/T	C/C	C/C	C/C
ST4.03ch01pos88297191.1	1	88297191	G/G	G/G	G/G	G/G	G/G	G/G	G/G	G/G	G/G	G/G	G/G	G/G	G/G	G/G	G/G	G/G	G/G	G/G	G/G	G/G	G/G	G/G	G/G	G/G	G/G	G/G	G/G	G/G	G/G	G/G	G/G	G/G	G/A	G/G	G/G	G/G	G/G	G/G	G/G	G/G	G/G	G/G	G/G	G/G	G/G	G/G	G/G
ST4.03ch01pos88343032.1	1	88343032	A/A	A/A	A/A	A/A	A/A	C/C	A/C	A/C	A/A	A/A	A/A	A/A	A/C	C/C	A/A	A/C	A/C	A/A	A/A	A/C	A/A	A/A	A/C	A/C	A/C	A/A	C/C	A/C	A/C	A/C	A/A	A/A	A/A	A/A	A/A	A/C	A/A	A/A	A/C	A/A	A/C	A/A	A/A	A/C	A/A	A/A	A/A
ST4.03ch01pos88347917.1	1	88347917	A/A	A/A	A/A	A/A	A/A	G/G	A/G	A/G	A/A	A/A	A/A	A/A	A/G	G/G	A/A	A/G	A/G	A/A	A/A	A/G	A/A	A/A	A/G	A/G	A/G	A/A	G/G	A/G	A/G	A/G	A/A	A/A	A/A	A/A	A/A	A/G	A/A	A/A	A/G	A/A	A/G	A/A	A/A	A/G	A/A	A/A	A/A
ST4.03ch01pos88347984.1	1	88347984	A/A	G/A	G/G	A/A	NA	A/A	G/A	G/A	A/A	A/A	A/A	A/A	A/A	A/A	G/A	A/A	G/A	G/G	G/A	G/A	G/G	G/A	A/A	A/A	A/A	G/A	A/A	G/A	G/A	G/A	A/A	G/G	G/A	A/A	A/A	G/A	G/A	A/A	G/A	G/A	A/A	A/A	G/G	G/A	A/A	G/A	G/A
ST4.03ch01pos88347991.1	1	88347991	G/G	A/G	A/A	G/G	NA	G/G	A/G	A/G	G/G	G/G	G/G	G/G	G/G	G/G	A/G	G/G	A/G	A/A	A/G	A/G	A/A	A/G	G/G	G/G	G/G	A/G	G/G	A/G	A/G	A/G	G/G	A/A	A/G	G/G	G/G	A/G	A/G	G/G	A/G	A/G	G/G	G/G	A/A	A/G	G/G	A/G	A/G
ST4.03ch01pos88389691.1	1	88389691	A/A	A/A	A/A	A/A	A/A	G/G	A/G	A/G	A/A	A/A	A/A	A/A	A/G	G/G	A/A	A/G	A/G	A/A	A/A	A/G	A/A	A/A	A/G	A/G	A/G	A/A	G/G	A/G	A/G	A/G	A/A	A/A	A/A	A/A	A/A	A/G	A/A	A/A	A/G	A/A	A/G	A/A	A/A	A/G	A/A	A/A	A/A
ST4.03ch01pos88389693.1	1	88389693	A/A	A/A	A/A	A/A	A/A	C/C	A/C	A/C	A/A	A/A	A/A	A/A	A/C	C/C	A/A	A/C	A/C	A/A	A/A	A/C	A/A	A/A	A/C	A/C	A/C	A/A	C/C	A/C	A/C	A/C	A/A	A/A	A/A	A/A	A/A	A/C	A/A	A/A	A/C	A/A	A/C	A/A	A/A	A/C	A/A	A/A	A/A
ST4.03ch01pos88389699.1	1	88389699	A/A	A/A	A/A	A/A	A/A	T/T	A/T	A/T	A/A	A/A	A/A	A/A	A/T	T/T	A/A	A/T	A/T	A/A	A/A	A/T	A/A	A/A	A/T	A/T	A/T	A/A	T/T	A/T	A/T	A/T	A/A	A/A	A/A	A/A	A/A	A/T	A/A	A/A	A/T	A/A	A/T	A/A	A/A	A/T	A/A	A/A	A/A
ST4.03ch01pos88508315.1	1	88508315	T/T	NA	C/T	C/T	C/T	T/T	C/T	T/T	T/T	C/T	C/T	C/T	T/T	T/T	NA	T/T	C/T	C/T	C/T	C/T	NA	C/T	T/T	T/T	C/T	C/T	T/T	T/T	C/T	C/T	T/T	C/C	C/C	T/T	T/T	C/T	C/C	T/T	C/T	C/T	C/T	T/T	C/T	C/T	C/T	C/T	T/T
ST4.03ch01pos88508340.1	1	88508340	A/A	NA	A/G	A/G	A/A	A/A	A/A	A/A	A/A	A/A	A/G	A/A	A/A	A/A	A/A	A/A	A/G	A/G	A/A	A/A	NA	A/A	A/A	A/A	A/A	A/G	A/A	A/A	A/A	A/A	A/A	A/A	A/A	A/A	A/A	A/A	A/A	A/A	A/G	A/A	A/A	A/A	A/G	A/A	A/A	A/A	A/A
ST4.03ch01pos88508380.1	1	88508380	C/C	A/C	NA	C/C	A/C	C/C	A/C	C/C	C/C	A/C	C/C	A/C	C/C	C/C	NA	C/C	C/C	A/C	A/C	A/C	NA	A/C	C/C	C/C	A/C	A/C	C/C	C/C	A/C	A/C	C/C	A/A	A/A	C/C	C/C	A/C	A/A	C/C	A/C	A/C	A/C	C/C	A/C	A/C	A/C	A/C	C/C
ST4.03ch01pos88508383.1	1	88508383	G/G	NA	A/G	A/G	A/G	G/G	A/G	G/G	G/G	A/G	A/G	A/G	G/G	G/G	NA	G/G	A/G	A/G	A/G	A/G	NA	A/G	G/G	G/G	A/G	A/G	G/G	G/G	A/G	A/G	G/G	A/A	A/A	G/G	G/G	A/G	A/A	G/G	A/G	A/G	A/G	G/G	A/G	A/G	A/G	A/G	G/G
ST4.03ch01pos88585838.1	1	88585838	C/C	NA	NA	C/C	C/C	C/C	C/C	C/A	C/C	C/C	C/C	C/C	C/C	C/C	NA	C/C	NA	C/A	C/C	C/C	NA	C/C	C/C	C/C	C/C	NA	C/C	C/A	NA	C/C	C/C	C/C	NA	C/C	C/C	NA	C/C	C/C	C/C	C/C	C/C	C/C	C/A	C/C	C/C	C/C	C/A
ST4.03ch01pos88621343.1	1	88621343	G/G	NA	A/A	G/G	G/G	G/G	G/G	G/A	G/G	G/G	G/G	G/G	G/G	G/G	G/G	G/G	G/A	NA	G/G	G/G	NA	NA	G/G	G/G	G/G	G/A	G/G	G/A	G/A	G/A	G/G	NA	NA	G/G	G/G	G/A	NA	G/G	G/G	G/G	G/G	G/G	A/A	G/G	G/G	G/G	G/A
ST4.03ch01pos88621479.1	1	88621479	A/A	G/A	G/A	A/A	G/A	A/A	G/A	A/A	A/A	G/A	A/A	G/A	A/A	A/A	G/A	A/A	A/A	G/A	G/A	G/A	G/G	G/A	A/A	A/A	G/A	G/A	A/A	A/A	G/A	G/A	A/A	G/G	G/G	A/A	A/A	G/A	G/G	A/A	G/A	G/A	G/A	A/A	G/A	G/A	G/A	G/A	A/A
ST4.03ch02pos1327293.1	2	1327293	G/G	G/C	G/C	G/C	G/C	G/G	G/G	G/G	G/G	G/C	G/C	G/C	G/G	G/G	G/G	G/G	G/C	G/C	NA	G/G	G/C	G/C	G/G	G/G	G/G	G/C	G/G	C/C	NA	G/C	G/G	NA	G/C	G/C	G/C	G/C	G/C	G/C	G/C	G/G	G/G	G/C	G/C	G/C	G/C	G/G	G/C
ST4.03ch02pos1327334.1	2	1327334	A/A	A/G	A/G	A/G	A/G	A/A	A/A	A/A	A/A	A/G	A/G	A/G	A/A	A/A	A/A	A/A	A/G	A/G	NA	A/A	A/G	A/G	A/A	A/A	A/A	A/G	A/A	G/G	NA	A/G	A/A	NA	A/G	A/G	A/G	A/G	A/G	A/G	A/G	A/A	A/A	A/G	A/G	A/G	A/G	A/A	A/G
ST4.03ch02pos2437242.1	2	2437242	C/C	C/T	C/T	C/T	C/T	C/C	C/C	C/C	C/C	C/T	C/T	C/T	C/C	C/C	C/C	C/C	C/T	C/T	C/C	C/C	C/T	C/T	C/C	C/C	C/C	C/T	C/C	T/T	C/T	C/T	C/C	C/T	C/C	C/C	C/C	C/T	C/T	C/T	C/T	C/C	C/C	C/T	C/T	C/T	C/T	C/C	C/T
ST4.03ch02pos2437312.1	2	2437312	A/A	A/G	A/G	A/G	A/G	A/A	A/A	A/A	A/A	A/G	A/G	A/G	A/A	A/A	A/A	A/A	A/G	A/G	A/A	A/A	A/G	A/G	A/A	A/A	A/G	A/G	A/A	G/G	A/G	A/G	A/A	A/G	G/G	A/A	A/A	A/G	A/G	A/G	A/G	A/A	A/G	A/G	A/G	A/G	A/G	A/A	A/G
ST4.03ch02pos5170294.1	2	5170294	A/A	A/T	A/T	A/T	A/T	A/A	A/A	A/A	A/A	A/T	A/T	A/T	A/A	A/A	A/A	A/A	A/T	A/T	A/A	A/A	A/T	A/T	A/A	A/A	A/A	A/T	A/A	T/T	A/T	A/T	A/A	A/T	A/A	A/A	A/A	A/T	A/T	A/T	A/T	A/A	A/A	A/T	A/T	A/T	A/T	A/A	A/T
ST4.03ch02pos6090264.1	2	6090264	C/C	C/G	C/G	C/G	C/G	C/C	C/C	C/C	C/C	C/G	C/G	C/G	C/C	C/C	C/C	C/C	C/G	NA	C/C	C/C	NA	C/G	C/C	C/C	C/C	C/G	C/C	G/G	C/G	C/G	C/C	C/G	C/G	C/G	C/G	C/G	C/G	C/G	C/G	C/C	C/C	C/G	C/G	C/G	C/G	C/C	C/G
ST4.03ch02pos6090304.1	2	6090304	T/T	T/G	T/G	T/G	T/G	T/T	T/T	T/T	T/T	T/G	T/G	T/G	T/T	T/T	T/T	T/T	T/G	NA	T/T	T/T	NA	T/G	T/T	T/T	T/T	T/G	T/T	G/G	T/G	T/G	T/T	T/G	T/T	T/T	T/T	T/G	T/G	T/G	T/G	T/T	T/T	T/G	T/G	T/G	T/G	T/T	T/G
ST4.03ch02pos6895025.1	2	6895025	C/C	C/G	C/G	C/G	C/G	C/C	C/C	C/C	C/C	C/G	C/G	C/G	C/C	C/C	C/C	C/C	C/G	C/G	C/C	C/C	C/G	C/G	C/C	C/C	C/C	C/G	C/C	G/G	C/G	C/G	C/C	C/G	C/C	C/C	C/C	C/G	C/G	C/G	C/G	C/C	C/C	C/G	C/G	C/G	C/G	C/C	C/G
ST4.03ch02pos6895060.1	2	6895060	G/G	G/A	G/A	G/A	G/A	G/G	G/G	G/G	G/G	G/A	G/A	G/A	G/G	G/G	G/G	G/G	G/A	G/A	G/G	G/G	G/A	G/A	G/G	G/G	G/G	G/A	G/G	A/A	G/A	G/A	G/G	G/A	G/A	G/A	G/A	G/A	G/A	G/A	G/A	G/G	G/G	G/A	G/A	G/A	G/A	G/G	G/A
ST4.03ch02pos7348484.1	2	7348484	A/A	NA	NA	NA	A/T	A/A	A/A	NA	A/A	A/T	NA	A/T	A/A	A/A	A/A	A/A	A/T	NA	A/A	A/A	NA	NA	A/A	A/A	A/A	T/T	A/A	T/T	A/T	A/T	A/A	A/T	A/A	A/A	A/A	A/T	A/T	A/T	NA	A/A	A/A	A/T	A/T	A/T	A/T	A/A	A/T
ST4.03ch02pos8619288.1	2	8619288	T/T	T/G	T/G	G/G	T/G	T/T	T/T	T/T	T/T	T/G	G/G	T/G	T/T	T/T	T/T	T/T	T/G	T/G	T/T	T/T	T/T	T/G	T/T	T/T	T/T	T/G	T/T	G/G	T/G	T/G	T/G	T/T	T/T	T/T	T/T	T/G	T/T	T/G	T/G	T/T	T/T	T/G	T/G	T/G	T/G	T/T	T/G
ST4.03ch02pos8707370.1	2	8707370	G/G	G/A	G/A	G/A	G/A	G/G	G/G	G/G	G/G	G/A	G/A	G/A	G/G	G/G	G/G	G/G	G/A	G/A	G/G	G/G	G/G	NA	G/G	G/G	G/G	G/A	G/G	A/A	G/A	G/G	G/G	G/G	G/G	G/G	G/G	G/A	G/G	G/A	G/A	G/G	G/G	G/A	G/A	G/A	G/A	G/G	G/A
ST4.03ch02pos8707375.1	2	8707375	G/G	G/G	G/G	G/A	G/G	G/G	G/G	G/G	G/G	G/G	G/A	G/G	G/G	G/G	G/G	G/G	G/G	G/G	G/G	G/G	G/G	G/G	G/G	G/G	G/G	G/A	G/G	G/G	G/G	NA	G/A	G/G	G/G	G/G	G/G	G/G	NA	G/G	G/G	G/G	G/G	G/G	G/G	G/G	G/G	G/G	G/G
ST4.03ch02pos8749527.1	2	8749527	C/C	T/T	C/T	T/T	C/T	C/T	C/T	C/T	C/T	C/T	T/T	C/T	C/T	C/T	C/T	C/T	C/T	NA	C/T	C/T	C/T	NA	C/T	C/T	NA	T/T	T/T	T/T	T/T	C/T	C/T	C/T	C/T	C/T	C/T	C/T	C/T	C/T	C/T	C/T	C/T	NA	C/T	C/T	C/T	C/T	T/T
ST4.03ch02pos8749539.1	2	8749539	NA	G/G	T/G	G/G	T/G	T/G	NA	T/G	T/G	NA	G/G	T/G	T/G	T/G	NA	T/G	T/G	G/G	NA	T/G	NA	NA	T/G	NA	T/G	G/G	G/G	G/G	G/G	T/G	T/G	T/G	NA	T/G	G/G	T/G	T/G	NA	G/G	T/G	T/G	G/G	T/G	NA	T/G	T/G	G/G
ST4.03ch02pos8749541.1	2	8749541	NA	A/A	G/A	A/A	A/A	G/A	NA	G/A	G/A	NA	A/A	G/A	G/A	G/A	NA	G/A	G/A	A/A	NA	G/A	NA	NA	G/A	NA	G/A	A/A	A/A	A/A	A/A	G/A	NA	G/A	NA	G/A	A/A	NA	G/A	NA	A/A	G/A	G/A	A/A	G/A	NA	NA	G/A	A/A
ST4.03ch02pos8749546.1	2	8749546	NA	T/T	C/T	T/T	C/T	C/T	NA	C/T	C/T	NA	T/T	C/T	C/T	C/T	NA	C/T	C/T	T/T	NA	C/T	NA	NA	C/T	NA	C/T	T/T	T/T	T/T	T/T	C/T	C/T	C/T	NA	C/T	T/T	C/T	C/T	NA	T/T	C/T	C/T	T/T	C/T	NA	C/T	NA	T/T
ST4.03ch02pos8749566.1	2	8749566	G/G	A/A	G/A	A/A	G/A	G/A	G/A	G/A	G/A	G/A	A/A	G/A	G/A	G/A	G/A	G/A	G/A	NA	G/A	G/A	G/A	NA	G/A	G/A	NA	A/A	A/A	A/A	A/A	G/A	G/A	G/A	G/A	G/A	G/A	G/A	G/A	G/A	G/A	G/A	G/A	NA	G/A	G/A	G/A	G/A	A/A
ST4.03ch02pos9113778.1	2	9113778	G/G	G/A	G/A	G/G	G/G	G/A	NA	G/A	NA	G/G	G/G	G/G	G/G	G/A	NA	G/G	G/G	G/G	G/A	G/G	NA	G/G	G/G	G/G	A/A	NA	G/G	G/G	NA	G/A	G/G	G/A	G/G	NA	NA	G/A	G/A	G/G	NA	G/G	A/A	G/G	G/A	G/G	G/G	A/A	G/G
ST4.03ch02pos9113814.1	2	9113814	A/A	A/G	A/G	A/A	A/A	A/G	NA	A/G	NA	A/A	A/A	A/A	A/A	A/G	NA	A/A	A/A	A/A	A/G	A/A	NA	A/A	A/A	A/A	G/G	NA	A/A	A/A	NA	A/G	A/A	A/G	A/A	NA	NA	A/G	A/G	A/A	NA	A/A	G/G	A/A	A/G	A/A	A/A	G/G	A/A
ST4.03ch02pos9113820.1	2	9113820	C/C	C/T	C/T	C/C	C/C	C/T	NA	C/T	NA	C/C	C/C	C/C	C/C	C/T	NA	C/C	C/C	C/C	C/T	C/C	NA	C/C	C/C	C/C	T/T	NA	C/C	C/C	NA	C/T	C/C	C/T	C/C	NA	NA	C/T	C/T	C/C	NA	C/C	T/T	C/C	C/T	C/C	C/C	T/T	C/C
ST4.03ch02pos9262617.1	2	9262617	T/T	NA	NA	T/T	T/C	T/C	NA	T/C	T/C	T/T	T/T	T/T	T/T	T/C	C/C	T/T	T/T	T/C	T/C	T/C	NA	NA	T/T	T/T	C/C	T/T	NA	T/T	NA	T/C	T/T	T/C	NA	T/C	T/C	T/C	T/C	T/T	T/C	T/T	C/C	T/T	T/C	T/T	T/C	C/C	T/T
ST4.03ch02pos9293005.1	2	9293005	A/A	A/G	A/G	A/G	A/A	A/A	A/A	A/A	A/A	A/G	A/G	A/G	A/A	A/A	A/A	A/A	A/G	A/G	A/A	A/A	A/A	A/G	A/A	A/A	A/A	A/G	A/A	G/G	A/G	A/G	A/A	A/A	A/G	A/A	A/A	A/G	A/A	A/A	G/G	A/A	A/A	A/A	A/G	A/G	A/G	A/A	A/G
ST4.03ch02pos9351975.1	2	9351975	G/G	G/A	G/A	G/A	G/G	G/G	G/G	G/G	G/G	G/A	G/A	G/A	G/G	G/G	G/G	G/G	G/A	G/A	G/G	G/G	G/G	G/A	G/G	G/G	G/G	G/A	G/G	A/A	G/A	G/G	G/G	G/G	G/G	G/G	G/G	G/A	G/G	G/G	G/A	G/G	G/G	G/G	G/A	G/A	G/A	G/G	G/A
ST4.03ch02pos9351998.1	2	9351998	G/G	G/A	G/A	G/G	G/A	G/A	G/A	G/A	G/A	G/G	G/G	G/G	G/G	G/A	A/A	G/G	G/G	G/A	G/A	G/A	G/A	G/G	G/G	G/G	G/A	NA	G/G	G/G	G/A	G/A	G/G	G/A	G/G	A/A	A/A	G/A	G/A	G/G	G/G	G/G	G/A	G/G	G/A	G/G	G/A	A/A	G/G
ST4.03ch02pos9352004.1	2	9352004	G/G	G/T	G/T	G/G	G/T	G/T	G/T	G/T	G/T	G/G	G/G	G/G	G/G	G/T	T/T	G/G	G/G	G/T	G/T	G/T	G/T	G/G	G/G	G/G	G/T	NA	G/G	G/G	G/T	G/T	G/G	G/T	G/T	T/T	T/T	G/T	G/T	G/G	G/G	G/G	G/T	G/G	G/T	G/G	G/T	T/T	G/G
ST4.03ch02pos9778644.1	2	9778644	T/T	T/C	C/C	T/T	T/C	T/C	T/C	T/C	T/C	NA	T/T	NA	T/T	T/C	C/C	NA	T/T	C/C	T/C	T/C	T/C	NA	T/T	T/T	C/C	NA	T/T	NA	T/C	T/C	T/T	C/C	C/C	C/C	C/C	T/C	T/C	T/T	NA	T/T	C/C	T/T	C/C	NA	C/C	C/C	T/T
ST4.03ch02pos10049717.1	2	10049717	A/A	NA	G/G	A/G	A/G	NA	A/G	A/G	A/G	A/G	A/G	A/G	A/A	A/G	G/G	A/A	A/G	G/G	A/G	A/G	NA	A/G	NA	A/A	A/G	A/G	A/A	G/G	A/G	A/G	A/A	NA	G/G	G/G	G/G	A/G	A/G	A/A	G/G	A/A	A/G	A/A	G/G	A/G	A/G	G/G	A/G
ST4.03ch02pos12228704.1	2	12228704	G/G	G/A	G/A	G/A	G/G	G/G	G/G	G/G	G/G	G/A	G/A	G/A	G/G	G/G	G/G	G/G	G/A	G/A	G/G	G/G	G/G	G/A	G/G	G/G	G/A	G/A	G/G	A/A	G/A	G/A	G/G	G/G	A/A	G/A	G/A	G/A	G/G	G/G	G/A	G/G	G/A	G/G	G/A	G/A	G/A	G/G	G/A
ST4.03ch02pos12630789.1	2	12630789	C/C	C/T	C/C	C/C	C/T	C/T	C/T	C/C	C/T	C/C	C/C	C/C	C/C	C/T	C/T	C/C	C/C	C/C	C/C	C/C	C/C	C/C	C/C	C/C	C/T	C/T	C/C	C/C	C/C	NA	C/C	C/C	C/C	C/C	C/T	C/C	C/C	C/C	C/C	C/C	C/T	C/C	C/C	C/C	C/C	C/T	C/C
ST4.03ch02pos12630805.1	2	12630805	T/T	T/G	T/T	T/T	T/G	T/G	T/G	T/T	T/G	T/T	T/T	T/T	T/T	T/G	T/G	T/T	T/T	T/T	T/T	T/T	T/T	T/T	T/T	T/T	T/G	T/G	T/T	T/T	T/T	NA	T/T	T/T	T/G	T/T	T/G	T/T	T/T	T/T	T/T	T/T	T/G	T/T	T/T	T/T	T/T	T/G	T/T
ST4.03ch02pos13175864.1	2	13175864	G/G	G/C	NA	G/C	G/G	G/G	G/G	G/G	G/G	NA	G/C	G/C	G/G	G/G	G/G	G/G	G/C	G/C	G/G	G/G	G/G	NA	G/G	G/G	G/G	G/C	G/G	C/C	G/C	G/G	G/G	G/G	C/C	G/G	G/G	G/C	G/G	G/G	G/C	G/G	G/G	G/G	G/C	G/C	G/C	G/G	G/C
ST4.03ch02pos13175925.1	2	13175925	T/T	T/C	NA	T/C	T/T	T/T	T/T	T/T	T/T	NA	T/C	T/C	T/T	T/T	T/T	T/T	T/C	T/C	T/T	T/T	T/T	NA	T/T	T/T	T/T	T/C	T/T	C/C	T/C	T/T	T/T	T/T	C/C	T/T	T/T	T/C	T/T	T/T	NA	T/T	T/T	T/T	NA	T/C	T/C	T/T	T/C
ST4.03ch02pos13803340.1	2	13803340	A/A	A/T	A/T	T/T	A/A	A/A	A/A	A/A	A/A	A/T	T/T	A/T	A/A	A/A	A/A	A/A	A/T	A/T	A/A	A/A	A/A	A/T	A/A	A/A	A/T	A/T	A/A	T/T	A/T	A/T	A/T	A/A	A/A	A/A	A/A	A/T	A/A	A/A	T/T	A/A	A/T	A/A	A/T	A/T	A/T	A/A	A/T
ST4.03ch02pos13915451.1	2	13915451	T/T	NA	NA	T/C	NA	T/T	NA	T/C	T/T	T/T	T/C	T/T	T/T	T/T	NA	NA	T/T	T/C	NA	T/C	T/C	T/T	NA	T/T	T/C	T/C	T/T	T/T	NA	T/C	T/C	NA	T/T	C/C	T/C	T/C	T/C	T/T	T/T	T/T	T/C	T/T	T/C	T/T	T/T	T/C	T/T
ST4.03ch02pos13959562.1	2	13959562	T/T	NA	T/A	T/A	T/A	T/T	T/A	T/A	T/T	T/T	T/A	T/T	T/T	T/T	T/A	T/T	T/T	T/A	T/A	T/A	T/A	T/T	T/T	T/T	T/A	T/A	T/T	T/T	T/A	T/A	T/A	NA	T/A	A/A	T/A	T/A	T/A	T/T	T/T	T/T	T/A	T/T	T/A	T/T	T/T	T/A	T/T
ST4.03ch02pos13980955.1	2	13980955	A/A	NA	A/G	A/G	A/G	A/A	A/G	A/G	A/A	A/A	A/G	A/A	A/A	A/A	NA	A/A	A/A	A/G	A/G	A/G	A/A	NA	A/A	A/A	A/G	A/G	A/A	A/A	A/G	A/G	A/G	A/G	A/A	A/G	A/G	A/G	A/G	A/A	A/A	A/A	A/G	A/A	A/G	A/A	A/A	A/G	A/A
ST4.03ch02pos13980967.1	2	13980967	A/A	NA	A/T	A/T	A/T	A/A	A/T	A/T	A/A	A/A	A/T	A/A	A/A	A/A	NA	A/A	A/A	A/T	A/T	A/T	A/A	NA	A/A	A/A	A/T	A/T	A/A	A/A	A/T	A/T	A/T	A/T	A/A	A/T	A/T	A/T	A/T	A/A	A/A	A/A	A/T	A/A	A/T	A/A	A/A	A/T	A/A
ST4.03ch02pos13980987.1	2	13980987	G/G	NA	G/A	G/G	G/A	G/G	G/A	G/A	G/G	G/G	G/G	G/G	G/G	G/G	NA	G/G	G/G	G/A	G/A	G/A	G/G	NA	G/G	G/G	G/G	G/G	G/G	G/G	G/A	NA	G/G	G/A	G/G	G/A	G/G	G/A	G/A	G/G	G/G	G/G	G/G	G/G	G/A	G/G	G/G	G/A	G/G
ST4.03ch02pos13980995.1	2	13980995	G/G	NA	G/A	G/A	G/A	G/G	G/A	G/A	G/G	G/G	G/A	G/G	G/G	G/G	NA	G/G	G/G	G/A	G/A	G/A	G/G	NA	G/G	G/G	G/A	G/A	G/G	G/G	G/A	G/A	G/A	G/A	G/G	G/A	G/A	G/A	G/A	G/G	G/G	G/G	G/A	G/G	G/A	G/G	G/G	G/A	G/G
ST4.03ch02pos13981006.1	2	13981006	A/A	NA	A/T	A/T	A/T	A/A	A/T	A/T	A/A	A/A	A/T	A/A	A/A	A/A	NA	A/A	A/A	A/T	A/T	A/T	A/A	NA	A/A	A/A	A/T	A/T	A/A	A/A	A/T	A/T	A/T	A/T	A/A	A/T	A/T	A/T	A/T	A/A	A/A	A/A	A/T	A/A	A/T	A/A	A/A	A/T	A/A
ST4.03ch02pos13981012.1	2	13981012	C/C	NA	C/T	C/T	C/C	C/C	C/C	C/C	C/C	C/T	C/T	C/T	C/C	C/C	C/C	C/C	C/T	C/T	C/C	C/C	C/C	C/T	C/C	C/C	C/T	C/C	C/C	C/C	C/C	C/C	C/C	C/C	C/C	C/C	C/C	C/C	C/C	C/C	C/T	C/C	C/T	C/C	C/T	C/T	C/T	C/C	C/C
ST4.03ch02pos13982328.1	2	13982328	C/C	C/G	G/G	G/G	C/C	C/C	C/C	C/C	C/C	C/G	G/G	C/G	C/C	C/C	C/C	C/C	C/G	G/G	C/C	C/C	C/C	C/G	C/C	C/C	C/G	NA	C/C	NA	C/C	C/G	C/C	C/C	C/C	C/C	C/C	C/C	C/C	C/C	G/G	C/C	C/G	C/C	G/G	C/G	C/G	C/C	C/C
ST4.03ch02pos13982348.1	2	13982348	G/G	G/A	A/A	A/A	G/G	G/G	G/G	G/G	G/G	G/A	A/A	G/A	G/G	G/G	G/G	G/G	G/A	A/A	G/G	G/G	G/G	G/A	G/G	G/G	G/A	NA	G/G	NA	G/G	G/A	G/G	G/G	G/G	G/G	G/G	G/G	G/G	G/G	A/A	G/G	G/A	G/G	A/A	G/A	G/A	G/G	G/G
ST4.03ch02pos13982370.1	2	13982370	G/G	G/T	T/T	T/T	G/G	G/G	G/G	G/G	G/G	G/T	T/T	G/T	G/G	G/G	G/G	G/G	G/T	T/T	G/G	G/G	G/G	G/T	G/G	G/G	G/T	NA	G/G	NA	G/G	G/T	G/G	G/G	NA	T/T	G/T	G/G	G/G	G/G	T/T	G/G	G/T	G/G	T/T	G/T	G/T	G/G	G/G
ST4.03ch02pos13982371.1	2	13982371	A/A	A/C	C/C	C/C	A/A	A/A	A/A	A/A	A/A	A/C	C/C	A/C	A/A	A/A	A/A	A/A	A/C	C/C	A/A	A/A	A/A	A/C	A/A	A/A	A/C	NA	A/A	NA	A/A	A/C	A/A	A/A	NA	C/C	A/C	A/A	A/A	A/A	C/C	A/A	A/C	A/A	C/C	A/C	A/C	A/A	A/A
ST4.03ch02pos13982379.1	2	13982379	G/G	G/A	A/A	A/A	G/G	G/G	G/G	G/G	G/G	G/A	A/A	G/A	G/G	G/G	G/G	G/G	G/A	A/A	G/G	G/G	G/G	G/A	G/G	G/G	G/A	NA	G/G	NA	G/G	G/A	G/G	G/G	G/G	G/G	G/G	G/G	G/G	G/G	A/A	G/G	G/A	G/G	A/A	G/A	G/A	G/G	G/G
ST4.03ch02pos13982380.1	2	13982380	A/A	A/C	C/C	C/C	A/A	A/A	A/A	A/A	A/A	A/C	C/C	A/C	A/A	A/A	A/A	A/A	A/C	C/C	A/A	A/A	A/A	A/C	A/A	A/A	A/C	NA	A/A	NA	A/A	A/C	A/A	NA	A/A	A/A	A/A	A/A	A/A	A/A	C/C	A/A	A/C	A/A	C/C	A/C	A/C	A/A	A/A
ST4.03ch02pos13982381.1	2	13982381	C/C	C/T	T/T	T/T	C/C	C/C	C/C	C/C	C/C	C/T	T/T	C/T	C/C	C/C	C/C	C/C	C/T	T/T	C/C	C/C	C/C	C/T	C/C	C/C	C/T	NA	C/C	NA	C/C	C/T	C/C	C/C	C/C	C/C	C/C	C/C	C/C	C/C	T/T	C/C	C/T	C/C	T/T	C/T	C/T	C/C	C/C
ST4.03ch02pos13982673.1	2	13982673	T/T	T/T	NA	G/G	T/G	T/T	T/G	T/G	T/T	T/T	G/G	T/T	T/T	T/T	T/G	T/T	T/T	G/G	T/G	T/G	T/G	T/G	NA	T/T	T/G	NA	T/T	NA	T/G	NA	T/G	NA	NA	G/G	T/G	T/G	T/G	T/T	NA	T/T	T/G	T/T	G/G	T/T	NA	T/G	T/T
ST4.03ch02pos13982698.1	2	13982698	G/G	G/G	NA	T/T	G/T	G/G	G/T	G/T	G/G	G/G	T/T	G/G	G/G	G/G	G/T	G/G	G/G	T/T	G/T	G/T	G/T	G/T	NA	G/G	G/T	NA	G/G	NA	G/T	NA	G/T	NA	NA	G/T	G/G	G/T	G/T	G/G	NA	G/G	G/T	G/G	T/T	G/G	NA	G/T	G/G
ST4.03ch02pos13982723.1	2	13982723	A/A	A/A	NA	G/G	A/G	A/A	A/G	A/G	A/A	A/A	G/G	A/A	A/A	A/A	A/G	A/A	A/A	G/G	A/G	A/G	A/G	A/G	NA	A/A	A/G	NA	A/A	NA	A/G	NA	A/G	NA	NA	G/G	A/G	A/G	A/G	A/A	NA	A/A	A/G	A/A	G/G	A/A	NA	A/G	A/A
ST4.03ch02pos13982724.1	2	13982724	G/G	G/G	NA	C/C	G/C	G/G	G/C	G/C	G/G	G/G	C/C	G/G	G/G	G/G	G/C	G/G	G/G	C/C	G/C	G/C	G/C	G/C	NA	G/G	G/C	NA	G/G	NA	G/C	NA	G/C	NA	NA	C/C	G/C	G/C	G/C	G/G	NA	G/G	G/C	G/G	C/C	G/G	NA	G/C	G/G
ST4.03ch02pos13982725.1	2	13982725	C/C	C/C	NA	A/A	C/A	C/C	C/A	C/A	C/C	C/C	A/A	C/C	C/C	C/C	C/A	C/C	C/C	A/A	C/A	C/A	C/A	C/A	NA	C/C	C/A	NA	C/C	NA	C/A	NA	C/A	NA	NA	A/A	C/A	C/A	C/A	C/C	NA	C/C	C/A	C/C	A/A	C/C	NA	C/A	C/C
ST4.03ch02pos14147433.1	2	14147433	C/T	C/T	T/T	C/T	C/T	C/T	C/T	T/T	C/T	C/T	C/T	C/T	C/T	C/T	C/T	C/T	C/T	T/T	T/T	C/T	C/T	C/T	C/T	C/T	C/T	C/T	C/T	T/T	C/T	C/T	C/C	C/T	C/C	T/T	C/T	C/T	C/T	C/T	T/T	C/C	C/T	C/T	T/T	T/T	C/T	C/T	C/T
ST4.03ch02pos14350924.1	2	14350924	C/C	C/A	NA	C/A	C/C	C/C	C/C	C/C	C/C	C/A	C/A	C/A	C/C	C/C	C/C	C/C	C/A	C/A	C/C	C/C	C/C	C/A	NA	C/C	C/C	C/A	C/C	C/C	C/C	NA	C/C	C/C	NA	C/C	C/C	C/C	C/C	C/C	C/A	C/C	C/C	C/C	C/A	C/A	C/A	C/C	C/C
ST4.03ch02pos14350936.1	2	14350936	A/C	A/C	C/C	A/C	A/C	A/C	A/A	A/C	A/C	A/C	A/C	A/C	A/C	A/C	A/A	A/C	A/C	A/C	A/C	A/A	A/A	A/C	NA	A/C	NA	A/C	A/C	C/C	A/C	A/C	A/A	A/A	NA	A/A	A/A	A/C	NA	A/C	NA	A/A	A/C	A/C	A/C	C/C	A/C	A/A	A/C
ST4.03ch02pos14350942.1	2	14350942	G/G	G/T	NA	G/T	G/G	G/G	G/G	G/G	G/G	G/T	G/T	G/T	G/G	G/G	G/G	G/G	G/T	G/T	G/G	G/G	G/G	G/T	NA	G/G	G/G	G/T	G/G	G/G	G/G	NA	G/G	G/G	NA	G/G	G/G	G/G	G/G	G/G	G/T	G/G	G/G	G/G	G/T	G/T	G/T	G/G	G/G
ST4.03ch02pos14350956.1	2	14350956	A/G	A/A	NA	A/A	A/G	A/G	A/A	A/G	A/G	A/A	A/A	A/A	A/G	A/G	A/A	A/G	A/A	A/G	A/G	A/A	A/A	A/A	NA	A/G	NA	NA	A/G	G/G	A/G	A/G	A/A	A/A	NA	A/A	A/A	A/G	A/A	A/G	A/G	A/A	A/G	A/G	A/G	A/G	A/A	A/A	A/G
ST4.03ch02pos14350962.1	2	14350962	T/C	T/C	C/C	T/C	T/C	T/C	T/C	C/C	T/C	T/C	T/C	T/C	T/C	T/C	NA	T/C	T/C	C/C	C/C	T/C	NA	T/C	NA	T/C	NA	T/C	T/C	C/C	NA	T/C	T/T	T/C	NA	C/C	C/C	T/C	T/C	T/C	NA	T/T	T/C	T/C	C/C	C/C	T/C	T/C	T/C
ST4.03ch02pos14350964.1	2	14350964	C/T	C/C	NA	C/C	C/T	C/T	C/C	C/T	C/T	C/C	C/C	C/C	C/T	C/T	C/C	C/T	C/C	C/T	C/T	C/C	C/C	C/C	NA	C/T	NA	NA	C/T	T/T	C/T	C/T	C/C	C/C	NA	C/C	C/C	C/T	C/C	C/T	C/T	C/C	C/T	C/T	C/T	C/T	C/C	C/C	C/T
ST4.03ch02pos15150580.1	2	15150580	T/T	T/A	A/A	T/A	T/A	T/A	NA	A/A	T/A	T/A	T/A	T/A	T/A	T/A	T/T	T/A	T/A	A/A	A/A	T/T	T/T	T/A	T/A	T/A	T/T	T/A	T/A	A/A	T/A	T/A	T/T	T/T	T/T	A/A	T/A	T/A	T/A	T/A	A/A	T/T	T/T	T/A	A/A	A/A	T/A	T/T	T/A
ST4.03ch02pos15150593.1	2	15150593	A/A	A/G	G/G	A/G	A/G	A/G	A/A	G/G	A/G	A/G	A/G	A/G	A/G	A/G	A/A	A/G	A/G	G/G	G/G	A/A	A/A	A/G	A/G	A/G	A/A	A/G	A/G	G/G	A/G	A/G	A/A	A/A	A/A	G/G	A/G	A/G	A/G	A/G	G/G	A/A	A/A	A/G	G/G	G/G	A/G	A/A	A/G
ST4.03ch02pos15150637.1	2	15150637	T/T	T/C	C/C	T/C	T/C	T/C	T/T	C/C	T/C	T/C	T/C	T/C	T/C	T/C	T/T	T/C	T/C	C/C	C/C	T/T	T/T	T/C	T/C	T/C	T/T	T/C	T/C	C/C	T/C	T/C	T/T	T/T	T/T	C/C	T/C	T/C	T/C	T/C	C/C	T/T	T/T	T/C	C/C	C/C	T/C	T/T	T/C
ST4.03ch02pos15204551.1	2	15204551	C/A	C/A	C/A	C/A	C/A	C/C	C/A	C/A	C/C	C/A	C/A	C/A	C/C	C/C	C/A	C/C	C/A	C/A	C/A	C/A	C/A	C/A	C/C	C/C	C/C	C/C	C/C	C/C	C/A	C/A	C/C	C/A	C/A	A/A	C/A	C/A	C/A	C/C	C/A	C/C	C/C	C/C	C/A	C/A	C/A	C/A	C/C
ST4.03ch02pos15204561.1	2	15204561	G/C	G/C	G/C	G/C	G/C	G/G	G/C	G/C	G/G	G/C	G/C	G/C	G/G	G/G	G/C	G/G	G/C	G/C	G/C	G/C	G/C	G/C	G/G	G/G	G/G	G/G	G/G	G/G	G/C	G/C	G/G	G/C	G/C	G/C	G/G	G/C	G/C	G/G	G/C	G/G	G/G	G/G	G/C	G/C	G/C	G/C	G/G
ST4.03ch02pos15868629.1	2	15868629	T/T	T/A	T/A	T/T	T/A	T/A	T/A	A/A	T/A	T/T	T/T	T/T	T/A	T/A	T/T	T/A	T/T	T/A	A/A	T/T	T/T	T/T	T/A	T/A	T/A	T/T	T/A	T/A	T/A	T/T	T/T	T/T	T/T	T/T	T/T	T/A	T/T	T/A	T/T	T/T	T/A	T/A	T/A	T/A	T/T	T/T	T/T
ST4.03ch02pos16167161.1	2	16167161	A/C	A/C	NA	A/A	A/A	A/A	A/C	A/A	A/A	A/A	A/A	A/A	A/A	A/A	A/C	A/A	A/A	A/C	A/C	A/C	NA	A/A	A/A	A/A	A/A	A/A	A/A	A/A	A/C	A/C	A/A	A/C	A/A	C/C	A/A	A/C	A/C	A/A	A/A	A/A	A/A	A/A	A/C	A/A	A/A	A/C	A/A
ST4.03ch02pos16167164.1	2	16167164	G/C	G/C	C/C	C/C	G/C	G/C	G/C	C/C	G/C	G/C	C/C	G/C	G/C	G/C	G/C	G/C	G/C	C/C	C/C	G/C	NA	G/C	G/C	G/C	G/C	G/C	G/C	C/C	G/C	G/C	G/C	G/C	NA	C/C	G/G	G/C	G/C	G/C	C/C	G/G	G/C	G/C	C/C	C/C	G/C	G/C	G/C
ST4.03ch02pos16196212.1	2	16196212	T/C	T/C	C/C	C/C	T/C	T/C	T/C	C/C	T/C	T/C	C/C	T/C	T/C	T/C	T/C	T/C	T/C	C/C	C/C	T/C	NA	T/C	T/C	T/C	T/C	NA	T/C	C/C	T/C	T/C	T/C	T/C	NA	C/C	T/C	T/C	T/C	T/C	C/C	T/T	T/C	T/C	C/C	C/C	T/C	T/C	T/C
ST4.03ch02pos16196230.1	2	16196230	T/A	T/A	T/A	T/T	NA	T/T	T/A	T/T	T/T	T/T	T/T	T/T	T/T	T/T	T/A	T/T	T/T	T/A	T/A	T/A	NA	NA	T/T	T/T	T/T	T/T	T/T	T/T	T/A	T/A	T/T	T/A	NA	T/A	T/T	T/A	T/A	T/T	T/T	T/T	T/T	T/T	T/A	T/T	NA	T/A	T/T
ST4.03ch02pos16196244.1	2	16196244	T/T	NA	T/C	C/C	T/C	T/C	NA	C/C	T/C	T/C	C/C	T/C	T/C	T/C	T/T	T/C	T/C	T/C	T/C	T/T	T/T	T/C	T/C	T/C	T/C	NA	T/C	C/C	T/C	T/C	T/C	T/T	NA	T/T	T/T	T/C	T/T	T/C	C/C	T/T	T/C	T/C	T/C	C/C	T/C	T/T	T/C
ST4.03ch02pos16196262.1	2	16196262	G/C	G/C	G/C	G/G	NA	G/G	G/C	G/G	G/G	G/G	G/G	G/G	G/G	G/G	G/C	G/G	G/G	G/C	G/C	G/C	NA	NA	G/G	G/G	G/G	G/G	G/G	G/G	G/C	G/C	G/G	G/C	NA	G/C	G/G	G/C	G/C	G/G	G/G	G/G	G/G	G/G	G/C	G/G	NA	G/C	G/G
ST4.03ch02pos16196268.1	2	16196268	A/G	A/G	G/G	G/G	A/G	A/G	A/G	G/G	A/G	A/G	G/G	A/G	A/G	A/G	A/G	A/G	A/G	G/G	G/G	A/G	NA	A/G	A/G	A/G	A/G	NA	A/G	G/G	A/G	A/G	A/G	A/G	NA	G/G	A/G	A/G	A/G	A/G	G/G	A/A	A/G	A/G	G/G	G/G	A/G	A/G	A/G
ST4.03ch02pos17173128.1	2	17173128	T/T	T/A	T/A	T/A	T/T	T/T	T/T	T/A	T/T	T/A	T/A	T/A	T/T	T/T	T/T	T/T	T/A	T/A	T/T	T/T	T/T	T/A	T/T	T/T	T/A	T/A	T/T	T/T	T/T	T/T	T/T	T/T	T/A	T/T	T/T	T/T	T/T	T/T	A/A	T/T	T/A	T/T	T/A	T/A	T/A	T/T	T/T
ST4.03ch02pos17173169.1	2	17173169	T/T	T/T	T/T	T/T	T/T	T/T	T/T	T/T	T/T	T/T	T/T	T/T	T/T	T/T	T/T	T/T	T/T	T/T	T/T	T/T	T/T	T/T	T/T	T/T	T/T	T/T	T/T	T/T	T/T	T/T	T/T	T/T	T/T	T/T	T/T	T/T	T/T	T/T	T/T	T/T	T/T	T/T	T/T	T/T	T/T	T/T	T/T
ST4.03ch02pos17173177.1	2	17173177	G/T	G/T	T/T	G/T	G/T	G/G	G/T	G/T	G/G	T/T	G/T	T/T	G/G	G/G	G/T	G/G	G/T	T/T	G/T	G/T	T/T	T/T	G/G	G/G	G/T	G/T	G/G	T/T	NA	G/T	G/T	T/T	G/T	G/T	G/G	G/T	G/T	G/T	T/T	G/G	G/T	G/T	T/T	G/T	G/T	G/T	T/T
ST4.03ch02pos17366737.1	2	17366737	T/T	T/T	T/T	T/T	T/T	T/T	T/T	T/T	T/T	T/T	T/T	T/T	T/T	T/T	T/T	T/T	T/T	T/T	T/T	T/T	NA	T/T	NA	T/T	T/T	T/A	T/T	T/A	T/A	T/T	T/T	T/T	T/T	T/T	T/T	NA	T/T	T/T	T/T	T/T	T/T	T/T	T/T	T/T	T/T	T/T	T/A
ST4.03ch02pos17646537.1	2	17646537	G/G	G/G	G/G	G/G	G/G	G/G	G/G	G/G	G/G	G/G	G/G	G/G	G/G	G/G	G/G	G/G	G/G	G/G	G/G	G/G	G/G	G/G	G/G	G/G	G/G	G/G	G/G	G/G	G/G	G/G	G/G	G/G	G/G	G/G	G/G	G/G	G/G	G/G	G/G	G/G	G/G	G/G	G/G	G/G	G/G	G/G	G/G
ST4.03ch02pos17677958.1	2	17677958	G/G	G/A	G/A	G/A	G/G	G/G	G/G	G/A	G/G	G/A	G/A	G/A	G/G	G/G	G/G	G/G	G/A	G/A	G/G	G/G	G/G	G/A	G/G	G/G	G/G	NA	G/G	G/G	G/G	G/G	G/G	G/G	G/G	G/G	G/G	G/G	G/G	G/G	G/A	G/G	G/G	G/G	G/A	G/A	G/A	G/G	G/G
ST4.03ch02pos17677960.1	2	17677960	A/A	T/A	T/A	T/A	A/A	T/A	T/A	T/A	T/A	T/A	T/A	T/A	T/A	T/A	T/A	T/A	T/A	T/A	A/A	T/A	A/A	T/A	T/A	T/A	T/A	T/A	T/A	A/A	NA	T/A	A/A	A/A	T/T	T/A	T/T	A/A	T/A	A/A	T/A	T/T	T/A	A/A	T/A	T/A	T/A	T/A	A/A
ST4.03ch02pos17759774.1	2	17759774	A/A	A/T	A/T	A/T	A/A	A/A	A/A	A/T	A/A	A/T	A/T	A/T	A/A	A/A	A/A	A/A	A/T	A/T	A/A	A/A	A/A	A/T	A/A	A/A	A/A	A/T	A/A	A/A	A/A	A/T	A/A	A/A	A/T	A/A	A/A	A/A	A/T	A/A	A/T	A/A	A/A	A/A	A/T	A/T	A/T	A/A	A/A
ST4.03ch02pos17759784.1	2	17759784	C/C	NA	C/G	C/G	C/C	C/C	C/C	C/G	C/C	C/G	C/G	C/G	C/C	C/C	C/C	C/C	C/G	C/G	C/C	C/C	C/C	NA	C/C	C/C	C/C	C/G	C/C	C/C	C/C	C/G	C/C	C/C	C/G	C/C	C/C	C/C	C/C	C/C	C/G	C/C	C/C	C/C	C/G	C/G	C/G	C/C	C/C
ST4.03ch02pos17759832.1	2	17759832	A/A	NA	A/C	A/C	A/A	A/A	A/A	A/C	A/A	A/C	A/C	A/C	A/A	A/A	A/A	A/A	A/C	A/C	A/A	A/A	A/A	NA	A/A	A/A	A/A	A/C	A/A	A/A	A/A	A/C	A/A	A/A	A/C	A/C	A/C	A/A	A/A	A/A	A/C	A/A	A/A	A/A	A/C	A/C	A/C	A/A	A/A
ST4.03ch02pos18356244.1	2	18356244	NA	G/G	G/G	G/G	G/G	G/G	G/G	G/G	G/G	G/G	G/G	G/G	NA	G/G	G/G	NA	G/G	G/G	G/G	NA	G/G	G/G	NA	NA	G/G	G/G	G/G	G/G	G/G	G/G	G/G	G/G	NA	G/G	G/G	G/G	G/G	G/G	NA	G/G	G/G	G/G	G/G	NA	G/G	G/G	G/G
ST4.03ch02pos18356245.1	2	18356245	NA	C/C	C/C	C/C	C/C	C/C	C/C	C/C	C/C	C/C	C/C	C/C	C/C	C/C	C/C	NA	T/T	C/C	C/C	NA	C/C	C/C	C/C	NA	C/C	C/C	C/C	C/C	C/C	C/C	C/C	C/C	NA	T/T	C/C	C/C	C/C	C/C	NA	C/C	C/C	C/C	C/C	NA	C/C	C/C	C/C
ST4.03ch02pos18428484.1	2	18428484	G/A	NA	NA	G/A	G/G	G/A	G/G	G/A	G/G	G/A	G/A	G/A	G/G	G/A	G/G	G/G	A/A	G/A	G/G	G/G	NA	NA	G/G	G/G	G/A	G/A	G/G	A/A	G/A	G/A	G/G	G/G	G/A	G/G	G/G	G/A	G/G	G/G	A/A	G/G	G/A	G/G	G/A	G/A	G/A	G/G	G/A
ST4.03ch02pos19607384.1	2	19607384	T/T	T/A	T/A	T/A	T/T	T/A	T/A	T/A	T/T	T/A	T/A	T/A	T/A	T/A	T/T	T/A	T/A	T/A	T/T	T/A	T/T	T/A	T/A	T/A	T/A	T/A	T/A	T/A	T/A	T/A	T/T	T/T	T/T	T/T	T/T	T/A	T/T	T/T	T/A	T/A	T/A	T/T	T/A	A/A	T/A	T/T	T/T
ST4.03ch02pos19607425.1	2	19607425	T/A	T/A	T/A	T/A	T/T	T/A	T/A	T/A	T/T	T/A	T/A	T/A	A/A	T/A	T/T	A/A	A/A	T/A	T/T	T/A	T/T	T/A	A/A	A/A	T/A	T/A	T/A	A/A	T/A	T/A	T/T	T/T	T/A	T/T	T/T	T/A	T/A	T/T	T/A	A/A	T/A	T/T	T/A	A/A	T/A	T/T	T/A
ST4.03ch02pos19847250.1	2	19847250	T/C	NA	T/C	T/C	T/C	C/C	NA	C/C	C/C	NA	T/C	NA	T/T	C/C	C/C	T/T	T/C	T/C	C/C	T/C	NA	T/C	T/T	T/T	T/C	T/C	T/C	T/C	T/C	T/C	T/T	T/C	T/T	C/C	C/C	T/C	T/C	T/C	T/C	T/T	T/C	T/C	T/C	T/C	T/C	C/C	T/C
ST4.03ch02pos19847328.1	2	19847328	T/A	NA	T/T	T/T	T/T	T/T	NA	T/T	T/T	T/T	T/T	T/T	T/A	T/T	T/T	NA	T/A	T/T	T/T	T/A	T/T	T/T	T/A	T/A	T/T	T/T	T/A	T/T	T/T	T/A	T/T	T/T	T/T	T/T	T/T	NA	T/T	T/T	T/T	T/A	T/T	T/T	T/T	T/A	T/T	T/T	T/T
ST4.03ch02pos19911179.1	2	19911179	C/C	A/A	C/A	C/A	C/A	A/A	C/A	A/A	A/A	C/A	C/A	C/A	C/C	A/A	C/A	C/C	C/A	C/A	C/A	C/C	NA	NA	C/C	C/C	C/A	C/A	C/A	C/C	C/C	C/A	C/C	C/C	NA	C/C	A/A	C/A	C/C	C/A	C/C	C/C	C/A	C/A	C/A	C/A	C/A	C/A	C/C
ST4.03ch02pos20034921.1	2	20034921	C/C	C/C	C/T	C/C	C/C	C/C	C/C	C/C	C/C	C/C	C/C	C/C	C/T	C/C	C/C	C/T	C/C	C/T	C/C	C/C	C/C	C/C	C/T	C/T	C/C	C/C	C/C	C/T	C/T	C/T	C/C	C/C	T/T	C/C	C/C	C/T	C/C	C/C	C/T	T/T	C/C	C/C	C/T	C/C	C/C	C/C	C/C
ST4.03ch02pos20196920.1	2	20196920	A/A	G/A	G/A	G/G	G/A	G/G	A/A	G/G	G/G	G/G	G/G	G/G	A/A	G/G	A/A	A/A	G/A	G/A	NA	A/A	NA	NA	NA	A/A	A/A	NA	G/A	A/A	G/A	G/A	G/G	G/A	A/A	A/A	A/A	G/A	G/A	G/G	A/A	A/A	A/A	G/G	G/A	G/A	NA	A/A	G/A
ST4.03ch02pos20196934.1	2	20196934	C/C	G/C	G/C	G/G	G/C	G/G	C/C	G/G	G/G	G/G	G/G	G/G	C/C	G/G	C/C	C/C	G/C	G/C	NA	C/C	NA	NA	NA	C/C	NA	NA	G/C	C/C	G/C	G/C	G/G	G/C	C/C	C/C	C/C	G/C	G/C	G/G	C/C	C/C	G/C	G/G	G/C	G/C	NA	C/C	G/C
ST4.03ch02pos20196935.1	2	20196935	C/C	T/C	T/C	T/T	T/C	T/T	C/C	T/T	T/T	T/T	T/T	T/T	C/C	T/T	C/C	C/C	T/C	T/C	NA	C/C	NA	NA	NA	C/C	NA	NA	T/C	C/C	T/C	T/C	T/T	T/C	C/C	C/C	C/C	T/C	T/C	T/T	C/C	C/C	T/C	T/T	T/C	T/C	NA	C/C	T/C
ST4.03ch02pos20477954.1	2	20477954	G/G	A/G	A/G	A/A	A/G	A/A	A/G	A/A	A/A	A/A	A/A	A/A	A/G	A/A	G/G	A/G	A/G	A/G	A/G	G/G	A/G	A/A	A/G	A/G	A/G	A/G	A/G	G/G	A/G	A/G	A/A	A/G	A/G	G/G	G/G	A/G	A/G	A/A	G/G	A/G	A/G	A/A	A/G	A/A	A/G	G/G	A/G
ST4.03ch02pos20477990.1	2	20477990	T/T	T/T	T/T	T/T	T/T	T/T	T/A	T/T	T/T	T/T	T/T	T/T	T/A	T/T	T/T	T/A	T/T	T/T	T/T	T/T	T/T	T/T	T/A	T/A	T/A	T/T	T/T	T/T	T/T	T/A	T/T	T/T	T/T	T/T	T/T	T/T	T/T	T/T	T/T	T/A	T/A	T/T	T/T	T/A	T/T	T/T	T/T
ST4.03ch02pos20486257.1	2	20486257	G/A	NA	G/A	G/G	NA	G/G	G/A	G/G	G/G	G/G	G/G	G/G	G/G	G/G	G/A	G/G	G/G	G/A	G/A	A/A	NA	NA	G/G	G/G	G/A	G/G	G/A	G/A	G/A	G/G	G/G	G/A	G/G	A/A	G/G	G/A	G/A	G/G	G/A	G/G	G/A	G/G	G/A	G/G	G/G	G/A	G/G
ST4.03ch02pos20486277.1	2	20486277	C/C	NA	T/C	T/T	T/C	T/T	C/C	T/T	T/T	T/T	T/T	T/T	NA	T/T	C/C	T/C	T/C	T/C	T/C	C/C	NA	NA	T/C	T/C	T/C	T/C	T/C	C/C	T/C	T/C	T/T	T/C	T/C	C/C	C/C	T/C	T/C	T/T	C/C	T/C	T/C	T/T	T/C	T/T	NA	C/C	T/C
ST4.03ch02pos20486336.1	2	20486336	T/C	NA	T/T	T/T	T/C	T/T	T/C	T/T	T/T	T/T	T/T	T/T	NA	T/T	T/C	T/C	T/C	T/T	T/T	T/T	NA	T/T	T/C	T/C	T/T	T/C	T/T	T/C	T/C	T/C	T/T	T/T	T/T	T/T	C/C	T/C	T/T	T/T	T/C	T/C	T/T	T/T	T/T	T/T	T/T	T/C	T/C
ST4.03ch02pos20699902.1	2	20699902	G/G	G/G	G/A	G/G	G/G	G/G	NA	G/G	G/G	G/G	G/G	G/G	G/A	G/G	G/G	G/A	G/G	G/A	G/G	G/G	G/G	G/G	G/A	G/A	G/A	G/G	G/G	G/A	G/A	NA	G/G	G/G	G/A	G/G	G/G	G/A	G/G	G/G	G/A	G/A	G/A	G/G	G/A	G/A	G/G	G/G	G/G
ST4.03ch02pos20699956.1	2	20699956	A/A	T/A	T/A	T/T	T/A	T/T	A/A	T/T	T/T	T/T	T/T	T/T	A/A	T/T	A/A	A/A	T/A	T/A	T/A	A/A	T/A	NA	A/A	A/A	A/A	T/A	T/A	A/A	T/A	T/A	T/T	T/A	A/A	A/A	A/A	T/A	T/A	T/T	A/A	A/A	A/A	T/T	T/A	T/A	T/A	A/A	T/A
ST4.03ch02pos20709226.1	2	20709226	A/A	G/A	G/A	G/G	G/A	G/G	G/A	G/G	G/G	G/G	G/G	G/G	G/A	G/G	G/A	G/A	G/G	G/A	G/A	A/A	G/A	NA	G/A	G/A	A/A	G/A	G/A	A/A	G/A	G/A	G/G	G/A	G/A	A/A	G/G	G/A	G/A	G/G	A/A	G/A	A/A	G/G	G/A	G/A	NA	G/A	G/A
ST4.03ch02pos20709274.1	2	20709274	G/G	G/G	G/G	G/G	G/A	G/G	G/A	G/G	G/G	G/G	G/G	G/G	G/A	G/G	G/A	G/A	G/A	G/G	G/G	G/G	G/G	G/G	G/A	G/A	G/G	G/G	G/G	G/G	G/G	G/A	G/G	G/G	G/A	G/G	A/A	G/G	NA	G/G	G/G	G/A	G/G	G/G	G/G	G/G	G/G	G/A	G/G
ST4.03ch02pos20815084.1	2	20815084	T/T	T/A	T/A	A/A	T/A	A/A	T/A	A/A	A/A	T/A	A/A	T/A	A/A	A/A	T/A	A/A	A/A	T/A	T/A	T/A	T/T	T/A	A/A	A/A	T/A	A/A	A/A	A/A	T/A	T/A	T/A	T/T	A/A	T/A	A/A	T/A	T/A	T/A	A/A	A/A	T/A	T/A	T/A	A/A	T/A	T/A	T/A
ST4.03ch02pos20815124.1	2	20815124	A/A	A/G	A/G	G/G	A/G	G/G	A/G	G/G	G/G	A/G	G/G	A/G	G/G	G/G	A/G	G/G	G/G	A/G	A/G	A/G	A/A	A/G	G/G	G/G	A/G	G/G	G/G	G/G	A/G	A/G	A/G	A/A	A/G	A/G	A/G	A/G	NA	A/G	G/G	G/G	A/G	A/G	A/G	G/G	A/G	A/G	A/G
ST4.03ch02pos20816671.1	2	20816671	C/T	C/T	C/T	C/T	C/T	C/T	C/T	C/T	C/T	C/T	C/T	C/T	C/C	C/T	C/C	C/C	NA	C/T	C/T	C/T	C/T	C/T	NA	C/T	C/T	C/T	C/T	C/C	C/C	C/T	C/T	C/T	C/T	C/T	C/T	C/T	C/T	C/T	C/T	C/T	NA	C/T	C/T	C/C	C/T	NA	C/T
ST4.03ch02pos20816674.1	2	20816674	A/C	A/C	A/C	NA	A/C	NA	A/C	NA	A/A	A/C	A/C	NA	A/C	NA	A/C	A/C	A/C	A/C	A/A	A/A	A/A	NA	A/C	A/C	A/C	A/C	A/A	C/C	A/C	A/C	NA	NA	A/C	A/C	A/C	A/C	A/C	NA	A/C	A/C	A/C	NA	A/C	A/C	A/C	A/C	A/C
ST4.03ch02pos20816675.1	2	20816675	C/C	C/C	C/C	C/C	C/C	C/C	C/C	C/C	C/C	C/C	C/C	C/C	C/C	C/C	C/C	C/C	C/C	C/C	C/C	C/C	C/C	C/C	C/C	C/C	C/C	C/C	C/C	C/C	C/C	C/C	C/C	C/C	C/C	C/C	C/C	C/C	C/C	C/C	C/C	C/C	C/C	C/C	C/C	C/C	C/C	C/C	C/C
ST4.03ch02pos20816677.1	2	20816677	C/C	C/C	C/A	C/C	C/A	C/C	C/A	C/C	C/C	C/C	C/C	C/C	C/A	C/C	C/A	C/A	C/A	C/A	C/C	C/C	C/C	C/C	C/A	C/A	C/A	C/A	C/C	A/A	C/A	C/A	C/C	C/C	C/A	C/C	C/A	C/A	C/C	C/C	C/A	C/C	C/A	C/C	C/A	C/A	C/C	C/A	C/A
ST4.03ch02pos20816678.1	2	20816678	C/C	C/C	C/C	C/C	C/C	C/C	C/C	C/C	C/C	C/C	C/C	C/C	C/C	C/C	C/C	C/C	C/C	C/C	C/C	C/C	C/C	C/C	C/C	C/C	C/C	C/C	C/C	C/C	C/C	C/C	C/C	C/C	C/C	C/C	C/C	C/C	C/C	C/C	C/C	C/C	C/C	C/C	C/C	C/C	C/C	C/C	C/C
ST4.03ch02pos20968083.1	2	20968083	C/C	C/C	T/C	C/C	NA	C/C	T/C	C/C	C/C	C/C	C/C	C/C	T/C	C/C	T/C	NA	T/C	T/C	C/C	C/C	C/C	C/C	T/C	T/C	T/C	T/C	C/C	T/C	T/C	T/C	C/C	C/C	NA	T/C	T/T	NA	C/C	C/C	T/C	C/C	T/C	C/C	T/C	T/C	C/C	T/C	T/C
ST4.03ch02pos20968400.1	2	20968400	T/T	NA	T/C	T/T	T/C	T/T	T/C	T/T	T/T	T/T	T/T	T/T	T/C	T/T	T/C	T/C	T/C	T/C	T/T	T/T	T/T	T/T	T/C	T/C	T/C	T/C	T/T	T/C	T/C	T/T	T/T	T/T	T/C	T/T	T/C	T/C	T/T	T/T	T/C	T/T	T/C	T/T	T/C	T/C	T/C	T/C	T/C
ST4.03ch02pos21162307.1	2	21162307	C/C	NA	C/T	C/T	NA	T/T	C/C	T/T	T/T	T/T	C/T	T/T	C/T	T/T	C/C	C/T	C/T	C/T	C/T	C/C	C/T	T/T	C/T	C/T	C/T	C/T	C/T	C/C	C/T	C/T	C/T	C/T	C/C	C/C	C/C	C/T	C/T	T/T	C/C	T/T	C/T	T/T	C/T	C/T	C/T	C/C	C/T
ST4.03ch02pos21436390.1	2	21436390	G/G	NA	NA	G/T	G/T	G/G	G/T	G/G	G/G	G/T	G/T	G/T	G/T	G/G	NA	G/T	G/G	G/T	G/G	G/T	NA	G/T	G/T	G/T	G/T	G/T	G/T	T/T	G/T	G/T	T/T	NA	G/T	G/G	G/T	G/T	G/T	G/T	T/T	G/T	G/T	G/T	G/T	G/T	G/T	G/T	T/T
ST4.03ch02pos21475608.1	2	21475608	A/A	A/A	A/T	A/T	A/T	A/A	A/T	A/A	A/A	A/T	A/T	A/T	A/T	A/A	A/T	A/T	A/A	A/T	A/A	A/T	A/T	A/T	A/T	A/T	T/T	A/T	A/T	T/T	A/T	A/T	T/T	A/T	T/T	A/T	T/T	A/T	A/T	A/T	T/T	A/T	T/T	A/T	A/T	A/T	A/T	A/T	T/T
ST4.03ch02pos21475617.1	2	21475617	A/A	A/A	A/A	A/A	A/A	A/A	NA	A/A	A/A	A/A	A/A	A/A	A/A	A/A	A/A	A/A	A/A	A/A	A/A	A/T	A/A	A/A	A/A	A/A	A/A	A/A	A/T	A/A	A/A	A/A	A/A	A/A	A/A	A/A	A/A	A/A	A/A	A/A	A/A	A/A	A/A	A/A	A/A	A/A	A/A	A/A	A/A
ST4.03ch02pos21483147.1	2	21483147	T/T	NA	T/A	T/A	T/A	T/T	T/A	T/T	T/T	T/A	T/A	T/A	T/A	T/T	T/A	T/A	T/T	T/A	T/T	T/A	T/A	T/A	T/A	T/A	A/A	T/A	T/A	A/A	T/A	T/A	A/A	T/A	A/A	T/T	A/A	T/A	T/A	T/A	A/A	T/A	A/A	T/A	T/A	T/A	T/A	T/A	A/A
ST4.03ch02pos21483181.1	2	21483181	T/T	T/T	T/T	T/T	T/T	T/T	T/A	T/T	T/T	T/T	T/T	T/T	T/T	T/T	T/T	T/T	T/T	T/T	T/T	T/A	T/T	T/T	T/T	T/T	T/T	T/T	T/A	T/T	T/T	T/T	T/T	T/T	T/T	T/T	T/T	T/T	T/T	T/T	T/T	T/T	T/T	T/T	T/T	T/T	T/T	T/T	T/T
ST4.03ch02pos21949360.1	2	21949360	C/C	C/T	C/T	C/T	C/T	C/T	C/T	C/T	C/T	C/T	C/T	C/T	C/T	C/T	C/T	C/T	C/T	C/T	C/T	C/C	C/T	C/T	C/T	C/T	C/T	C/T	C/T	C/T	C/T	C/T	C/T	C/T	C/C	C/C	C/T	C/T	C/T	C/T	C/T	C/T	NA	C/T	C/T	C/T	C/T	C/T	C/T
ST4.03ch02pos21949388.1	2	21949388	T/T	T/T	T/T	T/T	T/T	T/T	T/T	T/T	T/T	T/T	T/T	T/T	T/T	T/T	T/T	T/T	T/T	T/T	T/T	T/A	T/T	T/T	T/T	T/T	T/T	T/T	T/A	T/T	T/T	T/T	T/T	T/T	T/A	T/T	T/T	T/T	T/T	T/T	T/T	T/T	T/T	T/T	T/T	T/T	T/T	T/T	T/T
ST4.03ch02pos21949415.1	2	21949415	A/A	A/A	A/A	A/A	A/A	A/A	A/A	A/A	A/A	A/A	A/A	A/A	A/A	A/A	A/A	A/A	A/A	A/A	A/A	A/G	A/A	A/A	A/A	A/A	A/G	A/A	A/G	A/A	A/A	A/A	A/A	A/A	A/G	A/A	A/A	A/A	A/A	A/A	A/A	A/A	A/G	A/A	A/A	A/A	A/A	A/A	A/A
ST4.03ch02pos21958682.1	2	21958682	T/T	C/T	C/T	C/T	C/C	C/C	C/T	C/C	C/C	C/C	C/T	C/C	C/C	C/C	C/T	C/C	C/T	C/T	C/T	T/T	C/T	NA	C/C	C/C	C/T	C/T	C/T	C/C	C/T	C/T	C/T	C/T	T/T	T/T	C/C	C/T	C/T	C/C	C/T	C/C	C/T	C/C	C/T	C/C	C/C	C/T	C/C
ST4.03ch02pos21958687.1	2	21958687	T/T	C/T	C/T	C/T	C/C	C/C	C/T	C/C	C/C	C/C	C/T	C/C	C/C	C/C	C/T	C/C	C/T	C/T	C/T	C/T	C/T	NA	C/C	C/C	C/T	C/T	C/C	C/C	C/T	C/T	C/T	C/T	C/C	T/T	C/C	C/T	C/T	C/C	C/T	C/C	C/T	C/C	C/T	C/C	C/C	C/T	C/C
ST4.03ch02pos21985644.1	2	21985644	C/C	C/T	C/T	C/T	C/T	C/T	C/T	C/T	C/T	C/T	C/T	C/T	C/T	C/T	C/T	C/T	C/T	C/T	C/T	C/C	C/T	C/T	C/T	C/T	C/T	C/T	C/T	C/T	C/T	C/T	C/T	C/T	C/C	C/C	C/T	C/T	C/T	C/T	C/T	C/T	C/T	C/T	C/T	C/T	C/T	C/T	C/T
ST4.03ch02pos21985672.1	2	21985672	T/T	T/T	T/T	T/T	T/T	T/T	T/T	T/T	T/T	T/T	T/T	T/T	T/T	T/T	T/T	T/T	T/T	T/T	T/T	T/A	T/T	T/T	T/T	T/T	T/T	T/T	T/A	T/T	T/T	T/T	T/T	T/T	T/A	T/T	T/T	T/T	T/T	T/T	T/T	T/T	T/T	T/T	T/T	T/T	T/T	T/T	T/T
ST4.03ch02pos21985699.1	2	21985699	A/A	A/A	A/A	A/A	A/A	A/A	NA	A/A	A/A	A/A	A/A	A/A	A/A	A/A	A/A	A/A	A/A	A/A	A/A	A/G	A/A	A/A	A/A	A/A	A/G	A/A	A/G	A/A	A/A	A/A	A/A	A/A	A/G	A/A	A/A	A/A	A/A	A/A	A/A	A/A	A/G	A/A	A/A	A/A	A/A	A/A	A/A
ST4.03ch02pos22402137.1	2	22402137	G/G	NA	A/G	G/G	NA	G/G	NA	G/G	G/G	A/G	G/G	A/G	A/G	G/G	G/G	A/G	G/G	A/G	G/G	G/G	NA	NA	NA	A/G	A/G	A/G	G/G	A/G	A/G	A/G	A/G	A/G	A/A	A/G	A/G	A/G	NA	A/G	A/A	A/G	A/G	A/G	A/G	A/G	A/G	G/G	A/A
ST4.03ch02pos22653155.1	2	22653155	G/G	A/G	A/G	A/G	A/G	A/G	A/G	A/G	G/G	A/A	A/G	A/A	A/G	A/G	G/G	A/G	A/G	A/G	G/G	A/G	NA	NA	A/G	A/G	A/G	A/G	A/G	A/G	A/G	A/G	A/G	A/G	G/G	G/G	G/G	A/G	A/G	A/G	A/G	A/G	A/G	A/G	A/G	A/A	A/G	G/G	A/A
ST4.03ch02pos22653169.1	2	22653169	A/A	T/A	T/A	T/A	T/A	T/A	T/A	T/A	A/A	T/T	T/A	T/T	T/A	T/A	A/A	T/A	T/A	T/A	A/A	T/A	NA	NA	T/A	T/A	T/A	T/A	T/A	T/A	T/A	T/A	T/A	T/A	A/A	A/A	A/A	T/A	T/A	T/A	T/A	T/A	T/A	T/A	T/A	T/T	T/A	A/A	T/T
ST4.03ch02pos23046077.1	2	23046077	C/C	NA	T/C	C/C	C/C	T/C	C/C	C/C	T/C	C/C	C/C	C/C	C/C	T/C	C/C	C/C	C/C	T/C	C/C	C/C	NA	C/C	C/C	C/C	C/C	T/C	C/C	T/C	C/C	NA	C/C	NA	NA	C/C	C/C	C/C	C/C	C/C	T/T	T/C	C/C	C/C	T/C	C/C	C/C	C/C	T/C
ST4.03ch02pos23046090.1	2	23046090	T/T	NA	C/T	T/T	T/T	C/T	T/T	T/T	C/T	T/T	T/T	T/T	T/T	C/T	T/T	T/T	T/T	C/T	T/T	T/T	NA	T/T	T/T	T/T	T/T	C/T	T/T	C/T	T/T	NA	T/T	NA	NA	T/T	T/T	T/T	T/T	T/T	C/C	C/T	T/T	T/T	C/T	T/T	T/T	T/T	C/T
ST4.03ch02pos23046112.1	2	23046112	A/A	NA	G/A	A/A	A/A	G/A	A/A	A/A	G/A	A/A	A/A	A/A	A/A	G/A	A/A	A/A	A/A	G/A	A/A	A/A	NA	A/A	A/A	A/A	A/A	G/A	A/A	G/A	A/A	NA	A/A	NA	NA	A/A	A/A	A/A	A/A	A/A	G/G	G/A	A/A	A/A	G/A	A/A	A/A	A/A	G/A
ST4.03ch02pos23678838.1	2	23678838	NA	NA	C/T	C/T	C/T	C/T	NA	C/T	C/T	C/T	C/T	C/T	C/T	C/T	NA	C/T	C/T	C/T	NA	C/T	NA	NA	NA	NA	C/T	C/T	C/T	C/T	C/T	C/T	C/T	C/T	T/T	C/T	NA	C/T	C/T	C/T	C/T	C/T	C/T	C/T	C/T	C/T	C/T	NA	C/T
ST4.03ch02pos23678842.1	2	23678842	G/T	NA	G/T	NA	G/T	G/T	NA	G/T	G/T	G/T	G/T	G/T	NA	G/T	NA	G/T	G/T	G/T	NA	G/T	NA	NA	NA	NA	G/T	G/T	G/T	NA	G/T	G/T	G/T	G/T	T/T	G/T	NA	G/T	G/T	G/T	NA	G/T	G/T	G/T	G/T	NA	G/T	NA	G/T
ST4.03ch02pos23737468.1	2	23737468	G/G	NA	G/G	G/G	NA	G/G	G/C	G/G	G/G	G/G	G/G	G/G	G/C	G/G	G/C	G/C	G/G	G/G	G/G	G/G	G/G	NA	G/C	NA	G/G	NA	NA	G/C	G/C	G/G	G/G	G/G	G/G	G/G	G/C	NA	G/G	G/G	G/G	NA	G/G	G/G	G/G	G/C	G/G	G/C	G/G
ST4.03ch02pos23737490.1	2	23737490	T/T	NA	T/T	T/T	NA	T/T	T/A	T/T	T/T	T/T	T/T	T/T	T/A	T/T	T/A	T/A	T/T	T/T	T/T	T/T	T/T	NA	T/A	NA	T/T	NA	NA	T/A	T/A	T/T	T/T	T/T	T/T	T/T	T/A	NA	T/T	T/T	T/T	NA	T/T	T/T	T/T	T/A	T/T	T/A	T/T
ST4.03ch02pos23737508.1	2	23737508	C/C	NA	C/C	C/C	C/T	C/C	C/T	C/C	C/C	C/C	C/C	C/C	C/T	C/C	C/T	C/T	C/C	C/C	C/C	C/C	C/C	NA	NA	C/T	C/C	NA	NA	C/T	NA	C/T	C/C	C/C	NA	C/T	C/T	C/T	C/C	C/C	C/C	NA	C/C	C/C	C/C	C/T	C/C	C/T	C/C
ST4.03ch02pos23799410.1	2	23799410	G/G	NA	G/G	G/G	G/G	G/G	G/C	G/G	G/G	G/G	G/G	G/G	C/C	G/G	NA	C/C	G/G	G/G	G/C	G/G	NA	G/G	NA	C/C	G/G	G/G	G/G	G/C	G/C	G/C	G/G	NA	G/G	G/G	G/C	G/C	G/G	G/G	G/C	C/C	G/G	G/G	G/G	G/C	G/G	G/C	G/G
ST4.03ch02pos24148739.1	2	24148739	A/A	A/A	A/A	A/A	A/A	A/A	A/A	A/A	A/A	A/A	A/A	A/A	A/A	A/A	A/A	A/A	A/A	A/A	A/A	A/A	A/A	A/A	A/A	A/A	A/A	A/A	A/A	A/A	A/A	A/A	A/A	A/A	A/A	A/A	A/A	A/A	A/A	A/A	A/A	A/A	A/A	A/A	A/A	A/A	A/A	A/A	A/A
ST4.03ch02pos24187199.1	2	24187199	C/C	C/G	C/G	C/C	NA	C/C	C/G	C/C	C/C	C/C	C/C	C/C	G/G	C/C	C/G	G/G	C/G	C/G	C/G	C/C	C/C	C/C	NA	G/G	C/C	C/G	C/C	G/G	C/G	C/G	C/C	C/C	C/G	C/C	C/G	C/G	C/G	C/C	C/G	G/G	C/C	C/C	C/G	C/G	C/C	C/G	C/G
ST4.03ch02pos24187220.1	2	24187220	A/A	A/T	A/T	A/A	NA	A/A	A/T	A/A	A/A	A/A	A/A	A/A	T/T	A/A	A/T	T/T	A/T	A/T	A/T	A/A	A/A	A/A	NA	T/T	A/A	A/T	A/A	T/T	A/T	A/T	A/A	A/A	A/T	A/A	A/T	A/T	A/T	A/A	A/T	T/T	A/A	A/A	A/T	A/T	A/A	A/T	A/T
ST4.03ch02pos24388526.1	2	24388526	A/A	A/A	A/A	A/A	A/G	A/G	A/A	A/G	A/A	A/A	A/A	A/A	A/A	A/G	A/A	A/A	A/A	A/A	A/A	A/A	A/A	A/A	A/A	A/A	A/A	A/A	A/A	A/A	A/A	A/A	A/G	A/A	NA	A/A	A/A	A/A	A/A	A/A	A/G	A/A	A/A	A/G	A/A	A/A	A/A	A/A	A/G
ST4.03ch02pos24410180.1	2	24410180	C/T	C/T	C/T	C/C	C/T	C/T	C/T	C/T	C/T	C/C	C/C	C/C	T/T	C/T	C/T	T/T	C/C	C/T	T/T	C/T	C/T	C/C	T/T	T/T	C/C	NA	C/C	C/T	C/T	C/T	C/C	C/T	C/T	C/T	C/T	C/T	C/T	C/C	C/T	T/T	C/C	C/C	C/T	C/T	C/C	C/T	C/C
ST4.03ch02pos24410253.1	2	24410253	C/G	C/G	C/G	C/C	C/G	C/G	C/G	C/G	C/G	C/C	C/C	C/C	G/G	C/G	C/G	G/G	C/C	C/G	G/G	C/G	C/G	C/C	G/G	G/G	C/C	NA	C/C	C/G	C/G	C/G	C/C	C/G	C/G	C/G	C/G	C/G	C/G	C/C	C/G	G/G	C/C	C/C	C/G	C/G	C/C	C/G	C/C
ST4.03ch02pos24582812.1	2	24582812	G/A	NA	G/A	G/G	G/G	G/A	G/A	G/A	G/A	G/G	G/G	NA	A/A	G/A	G/A	A/A	G/G	G/A	NA	A/A	NA	NA	A/A	A/A	G/G	NA	G/A	G/A	G/A	G/A	G/G	NA	NA	G/A	G/A	G/A	NA	G/G	G/A	A/A	G/G	G/G	G/A	G/A	NA	G/A	G/G
ST4.03ch02pos25026263.1	2	25026263	G/C	G/C	G/C	G/C	G/C	G/C	G/C	G/C	G/C	G/C	G/C	G/C	G/G	G/C	G/C	G/G	G/C	G/C	G/G	G/C	G/G	NA	G/G	G/G	G/C	G/C	G/C	G/G	G/G	G/C	G/C	G/G	NA	G/G	G/C	NA	G/G	G/C	G/C	G/C	G/C	G/C	G/C	G/C	G/C	G/C	G/G
ST4.03ch02pos25304159.1	2	25304159	NA	NA	G/A	G/G	G/A	NA	NA	G/A	A/A	G/A	G/G	G/A	A/A	G/A	NA	A/A	G/G	NA	A/A	A/A	NA	G/A	A/A	A/A	G/A	G/A	NA	A/A	A/A	G/A	G/A	A/A	NA	A/A	G/A	A/A	NA	G/A	A/A	A/A	G/A	G/A	G/A	G/A	G/A	NA	A/A
ST4.03ch02pos25415133.1	2	25415133	T/T	T/T	T/T	T/T	T/T	T/T	T/T	T/T	T/T	T/T	T/T	T/T	T/T	T/T	T/T	T/T	T/T	T/T	T/T	T/T	T/T	T/T	T/T	T/T	T/T	T/T	T/T	T/T	T/T	T/C	T/T	T/T	T/C	T/C	T/C	T/T	T/T	T/T	T/C	T/T	T/T	T/T	T/T	T/T	T/T	T/T	T/T
ST4.03ch02pos25507939.1	2	25507939	NA	NA	C/C	C/C	NA	C/C	NA	C/C	C/C	C/C	C/C	C/C	C/C	C/C	C/T	C/C	C/C	C/C	C/C	C/C	C/C	C/C	NA	C/C	C/C	C/C	C/C	C/C	C/C	C/C	C/C	C/C	NA	C/C	NA	C/C	C/C	C/C	C/C	C/C	C/C	C/C	C/C	C/C	C/C	C/T	C/C
ST4.03ch02pos25725951.1	2	25725951	G/G	G/G	G/G	G/G	G/G	G/G	G/G	G/G	G/G	G/G	G/G	G/G	G/G	G/G	G/G	G/G	G/G	G/G	G/G	G/G	G/G	G/G	G/G	G/G	G/G	G/G	G/G	G/G	G/G	G/G	G/G	G/G	G/G	G/G	G/G	G/G	G/G	G/G	G/G	G/G	G/G	G/G	G/G	G/G	G/G	G/G	G/G
ST4.03ch02pos25952007.1	2	25952007	G/G	G/G	G/G	G/G	G/G	G/T	G/G	G/T	NA	G/G	G/G	G/G	G/G	NA	G/G	G/G	G/G	G/G	G/G	G/G	G/G	G/G	G/G	G/G	G/G	G/G	G/G	G/G	G/G	G/G	G/G	G/G	G/T	G/T	G/T	G/G	G/G	G/G	G/G	G/G	G/G	G/G	G/G	G/G	G/G	G/G	G/G
ST4.03ch02pos26227292.1	2	26227292	T/T	T/T	T/T	T/T	T/T	T/T	T/T	T/T	T/T	T/T	T/T	T/T	T/T	T/T	T/T	T/T	T/G	T/T	T/T	T/T	T/T	T/T	T/T	T/T	T/T	T/T	T/T	T/T	T/T	T/T	T/T	T/T	T/T	T/T	T/T	T/T	T/T	T/T	T/G	T/G	T/T	T/T	T/T	T/T	T/T	T/T	T/T
ST4.03ch02pos26507304.1	2	26507304	G/A	NA	G/G	G/A	G/A	G/G	G/A	G/G	G/G	G/A	G/A	G/A	G/G	G/G	G/A	G/G	G/A	G/G	G/G	G/G	G/A	G/A	G/G	G/G	G/A	G/G	G/G	G/G	G/A	G/A	G/A	G/A	G/A	G/G	G/A	G/A	G/A	G/A	G/G	G/G	G/A	G/A	G/G	G/G	G/A	G/A	G/A
ST4.03ch02pos26507328.1	2	26507328	G/A	NA	G/G	G/A	G/A	G/G	G/A	G/G	G/G	G/A	G/A	G/A	G/G	G/G	G/A	G/G	G/A	G/G	G/G	G/G	G/A	G/A	G/G	G/G	G/A	G/G	G/G	G/G	G/A	G/A	G/A	G/A	G/G	G/G	G/A	G/A	G/A	G/A	G/G	G/G	G/A	G/A	G/G	G/G	G/A	G/A	G/A
ST4.03ch02pos26590567.1	2	26590567	G/G	G/A	G/A	A/A	G/A	G/A	G/G	G/A	G/G	A/A	A/A	A/A	G/G	G/A	G/G	G/G	A/A	G/A	G/G	G/G	G/A	A/A	G/G	G/G	G/A	G/A	G/G	G/A	G/A	G/A	G/A	G/A	G/G	G/G	G/G	G/A	G/A	G/A	G/A	G/G	G/A	G/A	G/A	G/A	G/A	G/G	A/A
ST4.03ch02pos26627430.1	2	26627430	G/G	NA	A/G	A/G	G/G	A/A	G/G	A/A	NA	A/G	A/G	A/G	G/G	A/A	G/G	G/G	A/G	A/G	G/G	G/G	NA	A/G	G/G	G/G	G/G	NA	G/G	G/G	G/G	NA	G/G	G/G	A/G	G/G	G/G	G/G	G/G	G/G	G/G	G/G	G/G	G/G	A/G	A/G	A/G	G/G	G/G
ST4.03ch02pos26757242.1	2	26757242	G/G	C/G	C/G	C/C	C/G	C/C	NA	C/C	C/C	C/C	C/C	C/C	G/G	C/C	G/G	G/G	C/C	C/G	G/G	C/G	C/G	C/C	G/G	G/G	C/C	C/C	C/C	C/G	C/G	C/G	C/C	C/G	C/C	C/G	C/G	C/G	C/G	C/C	C/C	C/G	C/C	C/C	C/G	C/G	C/G	G/G	C/C
ST4.03ch02pos26800364.1	2	26800364	C/T	C/C	C/T	C/C	C/C	C/C	C/T	C/C	C/C	C/C	C/C	C/C	C/T	C/C	C/T	C/T	C/C	C/T	C/T	C/T	C/T	NA	C/T	C/T	C/C	C/C	C/C	C/T	C/T	C/T	C/C	C/T	C/C	C/T	C/C	C/T	C/T	C/C	C/C	C/T	C/C	C/C	C/T	C/T	NA	C/T	C/C
ST4.03ch02pos26926873.1	2	26926873	A/T	A/T	A/T	A/A	A/T	A/A	A/T	A/A	A/A	A/A	A/A	A/A	T/T	A/A	NA	T/T	A/A	A/T	T/T	A/T	A/T	A/A	NA	T/T	A/A	A/A	A/A	A/T	A/T	A/T	A/A	A/T	NA	A/T	A/A	A/T	A/T	A/A	A/A	A/T	A/A	A/A	A/T	A/T	A/A	A/T	A/A
ST4.03ch02pos26926927.1	2	26926927	A/T	A/T	A/T	A/A	A/T	A/A	A/T	A/A	A/A	A/A	A/A	A/A	T/T	A/A	NA	T/T	A/A	A/T	T/T	A/T	A/T	A/A	NA	T/T	A/A	A/A	A/A	A/T	A/T	A/T	A/A	A/T	NA	A/T	A/A	A/T	A/T	A/A	A/A	A/T	A/A	A/A	A/T	A/T	A/A	A/T	A/A
ST4.03ch02pos26926935.1	2	26926935	A/G	A/G	A/G	A/A	A/G	A/A	A/G	A/A	A/A	A/A	A/A	A/A	G/G	A/A	NA	G/G	A/A	A/G	G/G	A/G	A/G	A/A	NA	G/G	A/A	A/A	A/A	A/G	A/G	A/G	A/A	A/G	NA	A/G	A/A	A/G	A/G	A/A	A/A	A/G	A/A	A/A	A/G	A/G	A/A	A/G	A/A
ST4.03ch02pos26928752.1	2	26928752	T/C	T/C	T/C	T/T	T/C	T/T	T/C	T/T	T/T	T/T	T/T	T/T	C/C	T/T	T/C	C/C	T/T	T/C	C/C	T/C	T/C	NA	C/C	C/C	T/T	T/T	T/T	T/C	T/C	T/C	T/T	T/C	T/T	T/C	T/T	T/C	T/C	T/T	T/T	T/C	T/T	T/T	T/C	T/C	T/T	T/C	T/T
ST4.03ch02pos26929660.1	2	26929660	G/T	NA	G/T	G/G	NA	G/G	G/T	G/G	G/G	G/G	G/G	G/G	T/T	G/G	G/T	T/T	G/G	G/T	T/T	G/T	G/T	NA	T/T	T/T	G/G	G/G	G/G	G/T	G/T	G/T	G/G	G/T	NA	G/T	G/G	G/T	G/T	G/G	G/G	G/T	G/G	G/G	G/T	G/T	G/G	G/T	G/G
ST4.03ch02pos26929674.1	2	26929674	A/G	NA	A/G	A/A	NA	A/A	A/G	A/A	A/A	A/A	A/A	A/A	G/G	A/A	A/G	G/G	A/A	A/G	G/G	A/G	A/G	A/A	G/G	G/G	A/A	A/A	A/A	A/G	A/G	A/G	A/A	A/G	NA	A/G	A/A	A/G	A/G	A/A	A/A	A/G	A/A	A/A	A/G	A/G	A/A	A/G	A/A
ST4.03ch02pos26929686.1	2	26929686	G/A	NA	G/A	G/G	NA	G/G	G/A	G/G	G/G	G/G	G/G	G/G	A/A	G/G	G/A	A/A	G/G	G/A	A/A	G/A	G/A	NA	A/A	A/A	G/G	G/G	G/G	G/A	G/A	G/A	G/G	G/A	NA	G/A	G/G	G/A	G/A	G/G	G/G	G/A	G/G	G/G	G/A	G/A	G/G	G/A	G/G
ST4.03ch02pos26929784.1	2	26929784	A/T	A/T	A/T	A/A	A/T	A/A	A/T	A/A	A/A	A/A	A/A	A/A	T/T	A/A	A/T	T/T	A/A	A/T	T/T	A/T	A/T	A/T	T/T	T/T	A/A	A/A	A/A	A/T	A/T	A/T	A/A	A/T	A/A	A/T	A/A	A/T	A/T	A/A	A/A	A/T	A/A	A/A	A/T	A/T	A/T	A/T	A/A
ST4.03ch02pos27033206.1	2	27033206	T/T	T/T	T/T	T/C	T/C	T/T	T/T	T/T	T/T	T/C	T/C	T/C	T/T	T/T	NA	T/T	T/C	T/T	T/T	T/T	C/C	T/C	NA	T/T	T/C	T/C	T/T	T/C	T/C	T/C	T/C	T/C	NA	T/C	T/C	T/C	T/C	T/C	T/C	T/T	T/C	T/C	T/T	T/T	T/C	T/T	C/C
ST4.03ch02pos27090813.1	2	27090813	C/C	C/C	C/C	C/C	C/A	C/C	C/C	C/C	C/C	C/C	C/C	C/C	C/C	C/C	C/C	C/C	C/C	C/C	C/C	C/C	C/C	C/C	C/C	C/C	C/C	C/A	C/A	C/C	C/C	C/C	C/A	C/C	C/C	C/C	C/C	C/C	C/C	C/A	C/C	C/C	C/C	C/A	C/C	C/A	C/C	C/C	C/C
ST4.03ch02pos27090912.1	2	27090912	T/T	T/T	T/T	A/A	A/T	A/A	T/T	A/A	A/A	NA	A/A	A/A	T/T	A/A	T/T	T/T	A/A	T/T	T/T	T/T	T/T	NA	T/T	T/T	A/A	A/A	NA	T/T	T/T	T/T	A/A	T/T	NA	T/T	NA	T/T	T/T	A/A	NA	A/T	A/A	A/A	T/T	A/A	A/T	T/T	A/A
ST4.03ch02pos27090925.1	2	27090925	A/A	A/A	A/A	C/C	C/A	C/C	A/A	C/C	C/C	NA	C/C	C/C	A/A	C/C	A/A	A/A	C/C	A/A	A/A	A/A	A/A	NA	A/A	A/A	C/C	C/C	NA	A/A	A/A	A/A	C/C	A/A	NA	A/A	NA	A/A	A/A	C/C	NA	C/A	C/C	C/C	A/A	C/C	C/A	A/A	C/C
ST4.03ch02pos27140155.1	2	27140155	G/G	G/A	G/A	A/A	G/A	G/A	G/A	G/A	G/G	A/A	A/A	A/A	A/A	G/A	G/G	A/A	G/A	G/A	NA	A/A	A/A	A/A	A/A	A/A	G/A	G/A	G/A	A/A	G/A	G/A	G/A	A/A	G/A	G/G	G/G	G/A	NA	G/A	G/A	G/G	G/A	G/A	G/A	G/A	G/A	G/G	A/A
ST4.03ch02pos27363268.1	2	27363268	T/T	NA	C/T	C/C	C/T	C/C	C/T	C/C	C/C	C/C	C/C	C/C	T/T	C/C	NA	T/T	C/T	C/T	T/T	C/T	NA	NA	NA	T/T	T/T	C/T	NA	C/T	C/T	C/T	C/T	C/T	NA	C/T	C/C	C/T	C/T	C/T	C/T	T/T	T/T	C/T	C/T	T/T	C/C	C/T	C/C
ST4.03ch02pos27375511.1	2	27375511	A/A	G/A	G/A	G/A	A/A	G/A	A/A	G/A	A/A	G/A	G/A	G/A	A/A	G/A	A/A	A/A	G/A	G/A	A/A	A/A	A/A	G/A	A/A	A/A	A/A	NA	A/A	A/A	A/A	G/A	A/A	A/A	A/A	G/A	G/A	A/A	A/A	A/A	A/A	A/A	A/A	A/A	G/A	A/A	G/A	A/A	A/A
ST4.03ch02pos27394750.1	2	27394750	A/A	T/A	T/A	T/T	T/A	T/T	T/A	T/T	T/T	T/T	T/T	T/T	A/A	T/T	NA	A/A	T/A	T/A	A/A	T/A	NA	NA	A/A	A/A	T/T	T/A	T/A	T/A	T/A	T/A	T/A	T/A	NA	T/A	T/T	T/A	T/A	T/A	T/A	A/A	T/T	T/A	T/A	A/A	T/T	T/A	T/T
ST4.03ch02pos27415325.1	2	27415325	G/G	G/A	G/A	G/A	G/A	A/A	G/A	A/A	A/A	G/A	G/A	G/A	G/G	A/A	G/A	G/G	G/G	G/A	G/G	G/A	NA	NA	G/G	G/G	G/A	G/A	G/A	G/A	G/A	NA	G/A	G/A	NA	G/G	G/A	G/A	G/A	G/A	G/A	G/G	G/A	G/A	G/A	G/G	G/A	G/A	A/A
ST4.03ch02pos27415367.1	2	27415367	A/A	A/G	A/G	A/G	A/G	G/G	A/G	G/G	G/G	A/G	A/G	A/G	A/A	G/G	A/G	A/A	A/A	A/G	A/A	A/G	NA	NA	A/A	A/A	A/G	A/G	A/G	A/G	A/G	NA	A/G	A/G	NA	A/A	A/G	A/G	A/G	A/G	A/G	A/A	A/G	A/G	A/G	A/A	A/G	A/G	G/G
ST4.03ch02pos27418676.1	2	27418676	A/A	A/A	NA	A/T	A/T	NA	NA	A/T	A/A	A/T	NA	A/T	A/A	A/T	A/A	A/A	A/A	A/T	A/A	A/T	NA	A/T	NA	A/A	A/T	NA	NA	A/T	A/T	NA	A/T	NA	NA	A/A	A/A	A/T	NA	A/T	A/T	A/A	A/T	A/T	A/T	A/A	A/T	A/A	T/T
ST4.03ch02pos27519336.1	2	27519336	T/T	A/T	A/T	A/A	A/T	A/A	A/T	A/A	A/A	A/A	A/A	A/A	A/T	A/A	A/T	A/T	A/T	A/T	T/T	A/T	A/T	A/A	A/T	A/T	A/T	A/T	A/T	A/T	A/T	A/T	A/T	A/T	A/T	A/T	A/A	A/T	A/T	A/T	A/T	T/T	A/T	A/T	A/T	A/T	A/A	A/T	A/A
ST4.03ch02pos27519367.1	2	27519367	G/A	G/A	G/A	G/G	G/G	G/G	G/A	G/G	G/G	G/G	G/G	G/G	G/A	G/G	G/A	G/A	G/G	G/A	A/A	G/A	G/A	G/G	G/A	G/A	G/A	G/G	G/G	G/A	G/A	G/A	G/G	G/A	G/A	G/A	G/G	G/A	G/A	G/G	G/G	A/A	G/A	G/G	G/A	G/G	G/G	G/A	G/G
ST4.03ch02pos27519375.1	2	27519375	A/A	NA	A/G	A/G	A/G	A/G	NA	A/G	A/A	A/G	A/G	A/G	A/A	A/G	A/A	A/A	A/A	A/G	A/A	A/G	A/G	A/G	A/A	A/A	A/G	A/G	A/G	A/G	A/G	A/G	A/G	A/G	A/G	A/G	A/G	A/G	A/G	A/G	A/G	A/A	A/G	A/G	A/G	A/A	A/G	A/A	G/G
ST4.03ch02pos27519393.1	2	27519393	T/T	NA	T/C	T/C	T/C	T/C	NA	T/C	T/T	T/C	T/C	T/C	T/T	T/C	T/T	T/T	T/T	T/C	T/T	T/C	T/C	T/C	T/T	T/T	T/C	T/C	T/C	T/C	T/C	T/C	T/C	T/C	T/C	T/C	T/C	T/C	T/C	T/C	T/C	T/T	T/C	T/C	T/C	T/T	T/C	T/T	C/C
ST4.03ch02pos27608494.1	2	27608494	T/T	T/G	T/G	T/G	T/T	T/T	T/T	T/T	T/T	T/G	T/G	T/G	T/T	T/T	T/T	T/T	G/G	T/G	T/T	T/T	T/T	T/G	T/T	T/T	T/T	T/G	T/T	T/T	T/T	T/T	T/T	T/T	T/G	T/G	T/G	T/T	T/T	T/T	T/T	T/T	T/T	T/T	T/G	T/T	T/G	T/T	T/T
ST4.03ch02pos27608509.1	2	27608509	T/T	T/T	T/T	T/C	T/C	T/T	T/T	T/T	T/T	T/C	T/C	T/C	T/T	T/T	T/T	T/T	T/T	T/T	T/T	T/T	T/C	T/C	T/T	T/T	T/T	T/T	T/T	T/T	T/C	T/T	T/C	T/C	T/T	T/T	T/T	T/C	T/C	T/C	T/T	T/T	T/T	T/C	T/T	T/T	T/C	T/T	T/C
ST4.03ch02pos27618248.1	2	27618248	A/G	A/G	A/G	NA	A/G	A/A	A/G	A/A	A/A	NA	NA	NA	A/G	A/A	A/G	A/G	A/A	A/G	G/G	A/G	G/G	G/G	A/G	A/G	A/G	A/A	A/A	A/G	A/G	A/G	A/A	G/G	G/G	G/G	A/A	A/G	G/G	A/A	A/A	A/G	A/G	A/A	A/G	A/A	A/G	A/G	A/A
ST4.03ch02pos27618672.1	2	27618672	T/G	NA	NA	T/T	T/T	T/T	T/G	T/T	T/T	T/T	T/T	T/T	T/G	T/T	T/G	NA	T/T	T/G	G/G	T/G	NA	NA	T/G	T/G	T/G	T/T	T/T	T/G	T/G	T/G	T/T	T/G	NA	T/G	T/T	T/G	T/G	T/T	T/T	T/G	T/G	T/T	T/G	T/T	T/T	T/G	T/T
ST4.03ch02pos27618678.1	2	27618678	C/A	C/A	C/A	A/A	C/A	C/C	C/A	C/C	C/C	A/A	A/A	A/A	C/A	C/C	C/A	NA	C/A	C/A	A/A	C/A	NA	A/A	C/A	C/A	C/A	C/C	C/C	C/A	C/A	C/A	C/A	A/A	A/A	A/A	C/A	C/A	A/A	C/A	C/C	C/A	C/A	C/A	C/A	C/C	NA	C/A	C/A
ST4.03ch02pos27618683.1	2	27618683	A/A	A/A	A/A	A/T	A/T	A/A	A/A	A/A	A/A	A/T	A/T	A/T	A/A	A/A	A/A	A/A	A/A	A/A	A/A	A/A	NA	A/T	A/A	A/A	A/A	A/A	A/A	A/A	A/A	NA	A/T	A/T	A/A	A/A	A/A	A/T	A/T	A/T	A/A	A/A	A/A	A/T	A/A	A/A	A/T	A/A	A/T
ST4.03ch02pos27618687.1	2	27618687	A/T	NA	NA	A/A	A/A	A/A	A/T	A/A	A/A	A/A	A/A	A/A	A/T	A/A	A/T	NA	A/A	A/T	T/T	A/T	NA	NA	A/T	A/T	A/T	A/A	A/A	A/T	A/T	A/T	A/A	A/T	NA	A/T	A/A	A/T	A/T	A/A	A/A	A/T	A/T	A/A	A/T	A/A	A/A	A/T	A/A
ST4.03ch02pos27674377.1	2	27674377	G/T	NA	G/T	G/G	G/T	G/G	NA	G/G	NA	G/G	G/G	G/G	T/T	G/G	T/T	T/T	G/G	G/T	T/T	G/T	NA	NA	NA	NA	G/T	G/G	G/G	G/T	G/T	G/T	G/G	G/T	G/G	G/T	G/G	G/T	G/T	G/G	G/G	T/T	G/T	G/G	G/T	G/G	NA	T/T	G/G
ST4.03ch02pos27830454.1	2	27830454	C/C	G/C	C/C	NA	G/C	G/C	G/G	G/C	G/G	NA	NA	NA	G/G	G/C	G/G	G/G	C/C	C/C	NA	C/C	NA	NA	G/G	G/G	G/C	C/C	C/C	C/C	C/C	G/C	C/C	NA	NA	NA	G/G	G/C	G/C	C/C	C/C	G/G	G/C	C/C	C/C	G/C	NA	G/G	C/C
ST4.03ch02pos27830483.1	2	27830483	A/A	G/A	A/A	NA	G/A	G/A	G/G	G/A	G/G	NA	NA	NA	G/G	G/A	G/G	G/G	A/A	A/A	NA	A/A	NA	NA	G/G	G/G	G/A	A/A	A/A	A/A	A/A	G/A	A/A	NA	G/G	NA	G/G	G/A	G/A	A/A	A/A	G/G	G/A	A/A	A/A	G/A	NA	G/G	A/A
ST4.03ch02pos27830510.1	2	27830510	C/C	T/C	C/C	NA	T/C	T/C	T/T	T/C	T/T	NA	NA	NA	T/T	T/C	T/T	T/T	C/C	C/C	NA	C/C	NA	NA	T/T	T/T	T/C	C/C	C/C	C/C	C/C	T/C	C/C	NA	T/T	NA	T/T	T/C	T/C	C/C	C/C	T/T	T/C	C/C	C/C	T/C	NA	T/T	C/C
ST4.03ch02pos27830551.1	2	27830551	G/G	NA	G/G	G/G	C/G	C/G	C/G	C/G	C/G	G/G	G/G	G/G	C/G	C/G	C/G	C/G	G/G	G/G	G/G	G/G	G/G	G/G	C/G	C/G	C/G	C/G	G/G	G/G	NA	C/G	G/G	G/G	G/G	G/G	C/G	C/G	G/G	G/G	G/G	C/G	NA	G/G	G/G	C/G	NA	C/G	G/G
ST4.03ch02pos27830552.1	2	27830552	G/G	NA	G/G	G/G	C/G	C/G	C/G	C/G	C/G	G/G	G/G	G/G	C/G	C/G	C/G	C/G	G/G	G/G	G/G	G/G	G/G	G/G	C/G	C/G	C/G	C/G	G/G	G/G	NA	C/G	G/G	G/G	G/G	G/G	C/G	C/G	C/G	G/G	G/G	C/G	NA	G/G	G/G	C/G	NA	C/G	G/G
ST4.03ch02pos27830603.1	2	27830603	G/G	NA	G/G	G/G	A/G	A/G	A/G	A/G	A/G	G/G	G/G	G/G	A/G	A/G	A/G	A/G	G/G	G/G	G/G	G/G	G/G	G/G	A/G	A/G	A/G	A/G	G/G	G/G	NA	A/G	G/G	G/G	G/G	G/G	A/G	A/G	G/G	G/G	G/G	A/G	NA	G/G	G/G	A/G	NA	A/G	G/G
ST4.03ch02pos27830608.1	2	27830608	C/C	NA	C/C	C/C	T/C	T/C	T/C	T/C	T/C	C/C	C/C	C/C	T/C	T/C	T/C	T/C	C/C	C/C	C/C	C/C	C/C	C/C	T/C	T/C	T/C	T/C	C/C	C/C	NA	T/C	C/C	C/C	C/C	C/C	T/C	NA	C/C	C/C	C/C	T/C	NA	C/C	C/C	T/C	NA	T/C	C/C
ST4.03ch02pos27830618.1	2	27830618	G/G	NA	G/G	G/G	A/G	A/G	A/G	A/G	A/G	G/G	G/G	G/G	A/G	A/G	A/G	A/G	G/G	G/G	G/G	G/G	G/G	G/G	A/G	A/G	A/G	A/G	G/G	G/G	NA	A/G	G/G	G/G	G/G	G/G	A/G	A/G	G/G	G/G	G/G	A/G	NA	G/G	G/G	A/G	NA	A/G	G/G
ST4.03ch02pos27830620.1	2	27830620	G/G	NA	G/G	G/G	T/G	T/G	T/G	T/G	T/G	G/G	G/G	G/G	T/G	T/G	T/G	T/G	G/G	G/G	G/G	G/G	G/G	G/G	T/G	T/G	T/G	T/G	G/G	G/G	NA	T/G	G/G	G/G	G/G	G/G	T/G	T/G	G/G	G/G	G/G	T/G	NA	G/G	G/G	T/G	NA	T/G	G/G
ST4.03ch02pos27830624.1	2	27830624	T/T	NA	T/T	T/T	A/T	A/T	A/T	A/T	A/T	T/T	T/T	T/T	A/T	A/T	A/T	A/T	T/T	T/T	T/T	T/T	T/T	T/T	A/T	A/T	A/T	A/T	T/T	T/T	NA	A/T	T/T	T/T	T/T	T/T	A/T	A/T	T/T	T/T	T/T	A/T	NA	T/T	T/T	A/T	NA	A/T	T/T
ST4.03ch02pos27830627.1	2	27830627	T/T	NA	T/T	T/T	G/T	G/T	G/T	G/T	G/T	T/T	T/T	T/T	G/T	G/T	G/T	G/T	T/T	T/T	T/T	T/T	T/T	T/T	G/T	G/T	G/T	G/T	T/T	T/T	NA	G/T	T/T	T/T	T/T	T/T	G/T	NA	T/T	T/T	T/T	G/T	NA	T/T	T/T	G/T	NA	G/T	T/T
ST4.03ch02pos28103386.1	2	28103386	C/C	A/C	C/C	C/C	C/C	A/A	A/C	A/A	A/A	C/C	C/C	C/C	A/C	A/A	C/C	A/C	C/C	C/C	C/C	C/C	C/C	C/C	A/C	A/C	C/C	A/C	NA	NA	A/C	A/C	C/C	C/C	C/C	C/C	C/C	A/C	C/C	C/C	A/C	A/C	C/C	C/C	C/C	A/C	C/C	C/C	A/C
ST4.03ch02pos28103401.1	2	28103401	A/A	C/A	C/A	A/A	A/A	C/C	C/A	C/C	C/C	A/A	A/A	A/A	C/A	C/C	A/A	C/A	A/A	C/A	A/A	A/A	A/A	A/A	C/A	C/A	C/A	C/A	NA	NA	C/A	C/A	A/A	A/A	NA	A/A	A/A	C/A	A/A	A/A	C/C	C/A	C/A	A/A	C/A	C/A	A/A	A/A	C/A
ST4.03ch02pos28103428.1	2	28103428	T/T	A/T	T/T	T/T	T/T	A/A	A/T	A/A	A/A	T/T	T/T	T/T	A/T	A/A	T/T	A/T	T/T	T/T	T/T	T/T	T/T	T/T	A/T	A/T	T/T	A/T	NA	NA	A/T	A/T	T/T	T/T	T/T	T/T	T/T	A/T	T/T	T/T	A/T	A/T	T/T	T/T	T/T	A/T	T/T	T/T	A/T
ST4.03ch02pos28151914.1	2	28151914	A/A	G/A	A/A	A/A	A/A	G/G	A/A	G/G	G/G	A/A	A/A	A/A	G/A	G/G	A/A	G/A	A/A	A/A	A/A	A/A	A/A	A/A	G/A	G/A	A/A	G/A	A/A	G/A	G/A	G/A	A/A	A/A	A/A	A/A	A/A	G/A	A/A	A/A	G/A	G/A	A/A	A/A	A/A	G/A	A/A	A/A	G/A
ST4.03ch02pos28151926.1	2	28151926	T/T	C/T	C/T	T/T	T/T	C/C	T/T	C/C	C/C	T/T	T/T	T/T	C/T	C/C	T/T	C/T	T/T	C/T	T/T	T/T	T/T	T/T	C/T	C/T	C/T	C/T	T/T	C/T	C/T	C/T	T/T	T/T	C/T	T/T	T/T	C/T	NA	T/T	C/C	C/T	C/T	T/T	C/T	C/T	T/T	T/T	C/T
ST4.03ch02pos28152446.1	2	28152446	G/G	G/G	G/G	G/G	G/G	A/A	A/G	A/A	A/A	G/G	G/G	G/G	A/G	A/A	NA	NA	G/G	G/G	G/G	G/G	NA	G/G	A/G	A/G	G/G	A/G	G/G	A/G	A/G	A/G	G/G	G/G	G/G	G/G	G/G	A/G	G/G	G/G	A/G	A/G	G/G	G/G	G/G	A/G	G/G	G/G	A/G
ST4.03ch02pos28181046.1	2	28181046	T/T	C/T	C/T	T/T	T/T	C/C	NA	C/C	C/C	T/T	T/T	T/T	C/T	C/C	T/T	C/T	C/T	C/T	T/T	T/T	T/T	T/T	C/T	C/T	C/T	C/T	T/T	C/T	C/T	C/T	T/T	T/T	C/C	T/T	T/T	C/T	C/T	T/T	C/C	C/T	C/T	T/T	C/T	C/T	T/T	T/T	C/T
ST4.03ch02pos28401145.1	2	28401145	A/A	G/A	A/A	A/A	A/A	G/G	G/A	G/G	G/G	A/A	A/A	A/A	G/A	G/G	A/A	G/A	A/A	A/A	A/A	G/A	A/A	A/A	G/A	G/A	A/A	G/A	G/A	G/A	G/A	G/A	A/A	A/A	G/A	A/A	A/A	G/A	A/A	A/A	G/A	G/A	A/A	A/A	A/A	G/A	A/A	A/A	G/A
ST4.03ch02pos28479867.1	2	28479867	C/T	C/T	C/T	C/C	C/T	C/C	C/T	C/C	C/C	C/C	C/C	C/C	C/T	C/C	T/T	C/T	C/C	C/T	T/T	C/T	C/T	NA	C/T	C/T	C/T	C/C	C/C	C/T	C/T	C/T	C/C	C/T	C/C	C/T	C/T	C/T	C/T	C/C	C/T	C/T	C/T	C/C	C/T	C/C	C/T	T/T	C/C
ST4.03ch02pos28644309.1	2	28644309	G/G	G/G	G/G	A/G	A/G	G/G	NA	G/G	G/G	A/G	A/G	A/G	A/G	G/G	G/G	A/G	A/G	G/G	G/G	G/G	NA	A/G	A/G	A/G	A/G	G/G	A/G	G/G	NA	A/G	A/G	NA	A/G	G/G	G/G	A/G	A/G	A/G	A/G	A/G	A/G	A/G	G/G	A/G	A/G	G/G	A/G
ST4.03ch02pos28669008.1	2	28669008	C/C	C/C	C/C	T/C	T/C	C/C	T/C	C/C	C/C	T/C	T/C	T/C	T/C	C/C	C/C	T/C	T/C	C/C	C/C	T/C	T/C	T/C	T/C	T/C	T/C	C/C	T/C	C/C	T/C	T/C	T/C	T/C	T/C	C/C	C/C	T/C	T/C	T/C	T/C	T/C	T/C	T/C	C/C	T/C	T/C	C/C	T/C
ST4.03ch02pos28671621.1	2	28671621	T/T	T/T	T/T	C/T	C/T	T/T	C/T	T/T	T/T	C/T	C/T	C/T	C/T	T/T	T/T	C/T	C/T	T/T	T/T	C/T	NA	C/T	C/T	C/T	C/T	T/T	C/T	T/T	C/T	C/T	C/T	C/T	C/T	T/T	T/T	C/T	C/T	C/T	C/T	C/T	C/T	C/T	T/T	C/T	C/T	T/T	C/T
ST4.03ch02pos28671623.1	2	28671623	T/T	T/T	T/T	A/T	A/T	T/T	A/T	T/T	T/T	A/T	A/T	A/T	A/T	T/T	T/T	A/T	A/T	T/T	T/T	A/T	NA	A/T	A/T	A/T	A/T	T/T	A/T	T/T	A/T	A/T	A/T	A/T	A/T	T/T	T/T	A/T	A/T	A/T	A/T	A/T	A/T	A/T	T/T	A/T	A/T	T/T	A/T
ST4.03ch02pos28671708.1	2	28671708	G/G	NA	G/G	C/G	NA	G/G	NA	G/G	G/G	C/G	C/G	NA	NA	G/G	G/G	C/G	C/G	G/G	G/G	C/G	NA	NA	NA	NA	NA	G/G	NA	G/G	C/G	C/G	C/G	NA	NA	G/G	G/G	C/G	C/G	C/G	C/G	C/G	C/G	C/G	G/G	C/G	C/G	G/G	C/G
ST4.03ch02pos28671711.1	2	28671711	C/C	NA	C/C	T/C	NA	C/C	NA	C/C	C/C	T/C	T/C	NA	NA	C/C	C/C	T/C	T/C	C/C	C/C	T/C	NA	NA	NA	NA	NA	C/C	NA	C/C	T/C	T/C	T/C	NA	NA	C/C	C/C	T/C	T/C	T/C	T/C	T/C	T/C	T/C	C/C	T/C	T/C	C/C	T/C
ST4.03ch02pos28671750.1	2	28671750	A/A	NA	A/A	G/A	NA	A/A	A/A	A/A	A/A	G/A	G/A	NA	NA	A/A	A/A	G/A	G/A	A/A	A/A	A/A	NA	NA	NA	NA	NA	A/A	NA	A/A	NA	G/A	G/A	NA	NA	A/A	A/A	G/A	G/A	G/A	G/A	G/A	G/A	G/A	A/A	G/A	G/A	A/A	G/A
ST4.03ch02pos28684947.1	2	28684947	G/G	G/G	G/G	G/G	G/G	G/G	NA	G/G	G/G	G/G	G/G	G/G	G/G	G/G	G/G	G/G	G/G	G/G	G/G	G/A	G/G	G/G	G/G	G/G	G/G	G/G	G/G	G/G	G/G	G/G	G/G	G/G	G/G	G/G	G/G	G/G	G/G	G/G	G/G	G/G	G/G	G/G	G/G	G/G	G/G	G/G	G/G
ST4.03ch02pos28684972.1	2	28684972	A/C	NA	A/C	A/C	A/C	A/C	NA	A/C	A/A	A/C	A/C	A/C	A/A	A/C	A/A	A/A	A/C	A/C	A/A	A/C	A/A	NA	A/A	A/A	A/C	C/C	A/C	A/C	A/C	A/C	A/C	A/A	NA	A/C	A/C	NA	A/A	A/C	A/C	A/A	A/C	A/C	A/C	A/C	A/C	A/A	A/C
ST4.03ch02pos28789717.1	2	28789717	A/G	NA	A/G	A/G	A/G	A/G	NA	A/G	A/A	A/G	A/G	A/G	G/G	A/G	NA	A/G	A/G	A/G	A/A	A/G	NA	A/G	A/G	A/G	G/G	G/G	G/G	A/G	A/G	A/G	A/G	A/A	A/G	A/G	A/G	A/G	NA	A/G	NA	A/A	G/G	A/G	A/G	G/G	A/G	A/A	A/G
ST4.03ch02pos28789730.1	2	28789730	A/T	NA	A/T	A/T	A/T	A/T	NA	A/T	A/A	A/T	A/T	A/T	T/T	A/T	NA	A/T	T/T	A/T	A/A	A/T	NA	A/T	A/T	A/T	T/T	T/T	T/T	A/T	A/T	A/T	A/T	A/A	A/T	A/T	A/T	A/T	NA	A/T	NA	A/A	T/T	A/T	A/T	T/T	A/T	A/A	A/T
ST4.03ch02pos28789737.1	2	28789737	G/C	NA	NA	G/C	G/C	G/C	NA	G/C	G/G	G/C	G/C	G/C	C/C	G/C	NA	G/C	C/C	G/C	G/G	G/C	NA	G/C	G/C	G/C	C/C	C/C	C/C	G/C	G/C	G/C	G/C	G/G	G/C	G/C	G/C	G/C	G/C	G/C	NA	G/G	C/C	G/C	G/C	C/C	G/C	G/G	G/C
ST4.03ch02pos28817319.1	2	28817319	A/A	A/A	A/A	A/A	A/A	A/A	A/A	A/A	A/A	A/A	A/A	A/A	A/A	A/A	A/A	A/A	A/A	A/A	A/A	A/A	A/A	A/A	A/A	A/A	A/A	A/A	A/A	A/A	A/A	A/A	A/A	A/A	A/A	A/A	A/A	A/A	A/A	A/A	A/A	A/A	A/A	A/A	A/A	A/A	A/A	A/A	A/A
ST4.03ch02pos28817363.1	2	28817363	T/C	T/C	T/C	T/C	T/C	T/C	T/C	T/C	T/T	T/C	T/C	T/C	T/C	T/C	T/T	T/C	T/C	T/C	T/T	T/C	T/T	T/C	T/C	T/C	T/C	T/C	C/C	T/C	T/C	T/C	T/C	T/T	T/C	T/C	T/C	T/C	T/T	T/C	T/C	T/T	T/C	T/C	T/C	C/C	T/C	T/T	T/C
ST4.03ch02pos28817457.1	2	28817457	G/G	G/A	G/A	G/A	G/A	G/G	G/G	G/G	G/G	G/A	G/A	G/A	G/G	G/G	G/G	G/G	G/G	G/A	G/G	G/G	G/A	G/A	G/G	G/G	G/G	G/A	G/G	G/G	G/A	G/G	G/A	G/A	G/G	G/G	G/G	G/A	G/A	G/A	G/G	G/G	G/G	G/A	G/A	G/G	G/A	G/G	G/A
ST4.03ch02pos28906380.1	2	28906380	G/G	G/G	G/G	A/G	A/G	A/G	G/G	A/G	G/G	A/G	A/G	A/G	G/G	A/G	G/G	NA	G/G	G/G	G/G	G/G	NA	A/G	G/G	G/G	A/G	NA	G/G	A/G	A/G	G/G	A/G	NA	NA	G/G	G/G	A/G	A/G	A/G	G/G	A/G	A/G	A/G	G/G	G/G	A/G	G/G	A/A
ST4.03ch02pos28906438.1	2	28906438	C/T	C/T	C/C	C/C	C/T	C/T	C/T	C/T	T/T	C/C	C/C	C/C	C/T	C/T	C/C	NA	C/C	C/C	C/C	C/T	NA	C/C	C/T	C/T	C/T	C/T	T/T	C/C	NA	C/T	C/T	C/C	NA	C/C	C/C	NA	NA	C/T	T/T	C/C	C/T	C/T	C/C	T/T	C/C	C/C	C/C
ST4.03ch02pos28969126.1	2	28969126	A/G	NA	A/A	A/A	A/G	A/G	A/A	A/G	G/G	A/A	A/A	A/A	A/G	A/G	A/A	NA	A/A	A/A	A/A	A/A	NA	A/A	NA	NA	A/G	NA	G/G	A/A	A/A	A/G	A/G	A/A	NA	A/A	A/A	NA	NA	A/G	G/G	A/A	A/G	A/G	A/A	G/G	A/A	A/A	A/A
ST4.03ch02pos28969140.1	2	28969140	C/T	NA	C/C	C/C	C/T	C/T	C/C	C/T	T/T	C/C	C/C	C/C	C/T	C/T	C/C	NA	C/C	C/C	C/C	C/C	NA	C/C	NA	NA	C/T	NA	T/T	C/C	C/C	C/T	C/T	C/C	NA	C/C	C/C	NA	NA	C/T	T/T	C/C	C/T	C/T	C/C	T/T	C/C	C/C	C/C
ST4.03ch02pos28969552.1	2	28969552	G/G	G/G	G/T	G/G	G/G	G/G	G/G	G/G	G/G	G/G	G/G	G/G	G/G	G/G	G/G	G/G	G/T	G/T	G/G	G/G	G/G	G/G	G/G	G/G	G/G	G/G	G/G	G/G	G/G	G/G	G/G	G/G	G/G	G/G	G/G	G/G	G/G	G/G	G/G	G/G	G/G	G/G	G/T	G/G	G/G	G/G	G/G
ST4.03ch02pos28969560.1	2	28969560	T/T	T/T	T/A	T/T	T/T	T/T	T/T	T/T	T/T	T/T	T/T	T/T	T/T	T/T	T/T	T/T	T/A	T/A	T/T	T/T	T/T	T/T	T/T	T/T	T/T	T/T	T/T	T/T	T/T	T/T	T/T	T/T	T/T	T/T	T/T	T/T	T/T	T/T	T/T	T/T	T/T	T/T	T/A	T/T	T/T	T/T	T/T
ST4.03ch02pos28969574.1	2	28969574	C/G	C/G	C/G	C/G	C/G	C/C	C/G	C/C	C/C	C/G	C/G	C/G	C/G	C/C	G/G	C/G	C/G	C/G	G/G	C/G	C/G	C/G	C/G	C/G	C/G	NA	C/C	C/G	C/G	C/G	C/C	C/G	C/G	G/G	G/G	C/G	C/G	C/C	C/C	C/G	C/G	C/C	C/G	C/C	C/G	G/G	C/C
ST4.03ch02pos28969911.1	2	28969911	C/T	C/T	C/T	NA	C/T	C/C	C/T	C/C	C/C	C/T	C/T	C/T	NA	C/C	T/T	C/T	C/T	C/T	T/T	NA	NA	NA	C/T	C/T	NA	NA	C/C	C/T	C/T	C/T	C/C	NA	NA	T/T	T/T	C/T	C/T	C/C	C/C	C/T	C/T	C/C	C/T	C/C	C/T	T/T	C/C
ST4.03ch02pos28974575.1	2	28974575	A/G	A/G	A/A	A/A	A/G	A/G	A/A	A/G	G/G	A/A	A/A	A/A	A/G	A/G	A/A	A/G	A/A	A/A	A/A	A/A	A/A	A/A	A/G	A/G	A/G	A/G	G/G	A/A	A/A	A/G	A/G	A/A	A/A	A/A	A/A	A/G	A/A	A/G	G/G	A/A	A/G	A/G	A/A	G/G	A/A	A/A	A/A
ST4.03ch02pos28974590.1	2	28974590	A/G	A/G	A/A	A/A	A/G	A/G	A/A	A/G	G/G	A/A	A/A	A/A	A/G	A/G	A/A	A/G	A/A	A/A	A/A	A/A	A/A	A/A	A/G	A/G	A/G	A/G	G/G	A/A	A/A	A/G	A/G	A/A	A/A	A/A	A/A	A/G	A/A	A/G	G/G	A/A	A/G	A/G	A/A	G/G	A/A	A/A	A/A
ST4.03ch02pos28977558.1	2	28977558	T/T	C/T	C/C	C/C	C/T	T/T	T/T	T/T	T/T	C/C	C/C	C/C	T/T	T/T	NA	T/T	C/C	C/C	NA	NA	C/C	C/C	T/T	T/T	T/T	T/T	T/T	NA	C/T	C/T	C/T	C/C	C/C	NA	NA	C/T	C/T	C/T	T/T	NA	T/T	C/T	C/C	T/T	C/C	NA	C/C
ST4.03ch02pos28977611.1	2	28977611	A/A	T/A	T/T	A/A	A/A	A/A	A/A	A/A	A/A	A/A	A/A	A/A	A/A	A/A	NA	A/A	T/T	T/T	NA	NA	A/A	A/A	A/A	A/A	A/A	A/A	A/A	NA	A/A	T/A	A/A	A/A	A/A	NA	NA	A/A	A/A	A/A	A/A	NA	A/A	A/A	T/T	A/A	A/A	NA	A/A
ST4.03ch02pos29131501.1	2	29131501	G/G	G/G	G/A	G/G	G/G	G/A	G/G	G/A	G/G	G/G	G/G	G/G	G/G	G/A	G/G	G/G	G/G	G/A	G/G	G/A	G/G	G/G	G/G	G/G	G/A	G/A	G/G	G/A	G/A	G/A	G/G	G/G	G/A	G/G	G/G	G/A	G/G	G/G	G/G	G/A	G/A	G/G	G/A	G/G	G/G	G/G	A/A
ST4.03ch02pos29446311.1	2	29446311	G/G	NA	A/G	A/A	A/G	A/A	NA	A/A	A/A	A/A	A/A	A/A	A/G	A/A	G/G	NA	A/G	A/G	G/G	G/G	NA	NA	NA	A/G	A/A	A/G	A/G	A/G	A/G	A/G	A/G	NA	G/G	G/G	G/G	A/G	A/G	A/G	A/G	A/G	A/A	A/G	A/G	A/G	A/G	G/G	A/A
ST4.03ch02pos29446363.1	2	29446363	A/A	A/A	A/A	A/G	A/G	A/G	NA	A/G	A/A	NA	A/G	A/G	A/G	A/G	A/A	NA	A/A	A/A	A/A	A/A	NA	A/G	NA	A/G	G/G	NA	A/G	A/G	A/G	A/G	A/G	NA	A/A	A/A	A/A	A/G	A/G	A/G	A/A	A/G	G/G	A/G	A/A	A/G	A/G	A/A	G/G
ST4.03ch02pos29473355.1	2	29473355	A/T	A/T	A/T	A/A	A/T	A/A	A/A	A/A	A/A	A/A	A/A	A/A	A/T	A/A	A/A	A/T	A/T	A/T	A/T	A/T	A/A	A/A	A/T	A/T	A/A	A/T	A/T	A/T	A/T	A/T	A/T	A/A	A/T	A/T	A/T	A/T	A/T	A/T	T/T	A/T	A/A	A/T	A/T	A/T	A/A	A/A	A/A
ST4.03ch02pos29473357.1	2	29473357	G/T	G/T	G/T	G/T	G/T	G/T	G/T	G/T	G/G	G/T	G/T	G/T	T/T	G/T	G/G	T/T	G/T	G/T	G/T	G/T	G/T	G/T	T/T	T/T	T/T	G/T	T/T	T/T	G/T	G/T	T/T	G/T	G/T	G/T	G/T	G/T	G/T	T/T	T/T	T/T	T/T	T/T	G/T	T/T	G/T	G/G	T/T
ST4.03ch02pos29479316.1	2	29479316	T/C	T/C	T/C	T/C	C/C	T/C	T/C	T/C	T/T	T/C	T/C	T/C	C/C	T/C	T/C	C/C	T/C	T/C	NA	T/C	C/C	T/C	C/C	C/C	C/C	C/C	C/C	C/C	C/C	C/C	C/C	T/C	C/C	NA	T/C	T/C	T/C	C/C	C/C	C/C	C/C	C/C	T/C	C/C	T/C	T/T	C/C
ST4.03ch02pos29479322.1	2	29479322	T/C	T/C	T/C	T/C	C/C	T/C	T/C	T/C	T/T	T/C	T/C	T/C	C/C	T/C	T/C	C/C	T/C	T/C	NA	T/C	C/C	T/C	C/C	C/C	C/C	C/C	C/C	C/C	C/C	C/C	C/C	T/C	C/C	NA	T/C	T/C	T/C	C/C	C/C	C/C	C/C	C/C	T/C	C/C	T/C	T/T	C/C
ST4.03ch02pos29479380.1	2	29479380	T/G	T/G	T/G	T/T	T/G	T/T	T/G	T/T	T/T	T/T	T/T	T/T	T/G	T/T	T/T	T/G	T/G	T/G	NA	T/G	T/T	T/T	T/G	T/G	T/T	T/G	T/G	T/G	T/G	T/G	T/G	T/T	G/G	NA	T/G	T/G	T/G	T/G	G/G	T/G	T/T	T/G	T/G	T/G	T/T	T/T	T/T
ST4.03ch02pos29488628.1	2	29488628	T/C	NA	NA	T/T	T/C	T/T	T/C	T/T	T/T	T/T	T/T	T/T	T/C	T/T	T/T	T/C	T/C	T/C	NA	NA	NA	NA	T/C	T/C	T/T	T/C	T/C	T/C	T/C	T/C	T/C	T/T	C/C	T/C	T/C	T/C	NA	T/C	C/C	T/C	T/T	T/C	T/C	T/C	T/T	T/T	T/T
ST4.03ch02pos29608984.1	2	29608984	T/C	T/C	T/C	T/C	T/C	T/T	T/C	T/T	T/C	T/C	T/C	T/C	C/C	T/T	T/T	C/C	T/C	T/C	T/C	T/C	T/C	T/C	C/C	C/C	T/C	T/C	C/C	T/C	T/C	T/C	C/C	T/C	C/C	T/C	T/C	T/C	T/C	C/C	C/C	C/C	T/C	C/C	T/C	C/C	T/C	T/T	T/C
ST4.03ch02pos29608994.1	2	29608994	G/A	G/A	G/A	G/A	G/A	G/G	G/A	G/G	G/A	G/A	G/A	G/A	A/A	G/G	G/G	A/A	G/A	G/A	G/A	G/A	G/A	G/A	A/A	A/A	G/A	G/A	A/A	G/A	G/A	G/A	A/A	G/A	G/A	G/A	G/A	G/A	G/A	A/A	A/A	A/A	G/A	A/A	G/A	A/A	G/A	G/G	G/A
ST4.03ch02pos29690073.1	2	29690073	C/T	C/T	C/T	C/C	C/T	C/C	C/T	C/C	C/T	C/C	C/C	C/C	T/T	C/C	C/C	T/T	C/T	C/T	C/T	NA	NA	C/C	NA	T/T	C/T	C/T	T/T	C/T	C/T	C/T	C/T	C/C	T/T	NA	C/T	C/T	C/T	C/T	T/T	T/T	C/T	C/T	C/T	T/T	C/C	C/C	C/C
ST4.03ch02pos29690075.1	2	29690075	A/G	A/G	A/G	A/A	A/G	A/A	A/G	A/A	A/G	A/A	A/A	A/A	G/G	A/A	A/A	G/G	A/G	A/G	A/G	NA	NA	A/A	NA	G/G	A/G	A/G	G/G	A/G	A/G	A/G	A/G	A/A	G/G	NA	A/G	A/G	A/G	A/G	G/G	G/G	A/G	A/G	A/G	G/G	A/A	A/A	A/A
ST4.03ch02pos29690081.1	2	29690081	C/A	C/A	C/A	C/C	C/A	C/C	C/A	C/C	C/A	C/C	C/C	C/C	A/A	C/C	C/C	A/A	C/A	C/A	C/A	NA	NA	C/C	NA	A/A	C/A	C/A	A/A	C/A	C/A	C/A	C/A	C/C	A/A	NA	C/A	C/A	C/A	C/A	A/A	A/A	C/A	C/A	C/A	A/A	C/C	C/C	C/C
ST4.03ch02pos29690088.1	2	29690088	C/T	C/T	C/T	C/C	C/T	C/C	C/T	C/C	C/T	C/C	C/C	C/C	T/T	C/C	C/C	T/T	C/T	C/T	C/T	NA	NA	C/C	NA	T/T	C/T	C/T	T/T	C/T	C/T	C/T	C/T	C/C	T/T	NA	C/T	C/T	C/T	C/T	T/T	T/T	C/T	C/T	C/T	T/T	C/C	C/C	C/C
ST4.03ch02pos29704661.1	2	29704661	T/T	T/T	T/T	T/T	T/T	T/T	T/T	T/T	T/T	T/T	T/T	T/T	NA	T/T	T/T	NA	T/T	T/T	T/T	T/T	T/T	T/T	NA	NA	T/T	T/T	NA	T/T	T/T	T/A	T/T	T/T	A/A	T/T	T/T	T/T	T/T	T/T	NA	NA	T/T	T/T	T/T	NA	T/T	T/T	T/T
ST4.03ch02pos29904388.1	2	29904388	T/T	T/T	T/T	T/T	T/T	T/T	T/T	T/T	T/T	T/T	T/T	T/T	T/T	T/T	T/T	T/T	T/T	T/T	T/T	T/T	T/T	T/T	T/T	T/T	T/T	T/T	T/T	T/T	T/T	T/T	T/T	T/T	T/T	T/T	T/T	T/T	T/T	T/T	T/T	T/T	T/T	T/T	T/T	T/T	T/T	T/T	T/T
ST4.03ch02pos29931990.1	2	29931990	T/C	NA	NA	T/C	T/C	T/C	NA	T/C	T/T	NA	T/C	T/C	NA	T/C	NA	C/C	T/T	T/C	T/C	T/C	NA	T/C	C/C	C/C	C/C	NA	T/C	C/C	T/C	T/C	T/C	NA	C/C	T/C	T/C	T/C	T/C	T/C	C/C	C/C	C/C	T/C	T/C	T/C	T/C	T/T	C/C
ST4.03ch02pos29947668.1	2	29947668	A/G	A/G	A/G	A/A	A/G	A/G	A/G	A/G	A/A	A/A	A/A	A/A	A/A	A/G	A/G	A/A	A/A	A/G	A/G	A/G	A/G	A/G	A/A	A/A	A/A	NA	A/G	A/A	A/A	A/G	A/A	A/G	A/A	A/G	A/G	A/G	A/G	A/G	A/A	A/G	A/A	A/G	A/G	A/G	A/A	A/G	A/A
ST4.03ch02pos29947671.1	2	29947671	A/G	A/G	A/G	A/G	A/G	A/G	A/G	A/G	A/G	A/G	A/G	A/G	A/G	A/G	A/G	A/G	A/G	A/G	A/G	A/G	A/G	A/G	A/G	A/G	A/G	A/G	A/G	A/G	A/G	A/G	A/G	A/G	G/G	A/G	A/G	A/G	A/G	A/G	G/G	A/G	A/G	A/G	A/G	A/G	A/G	A/G	G/G
ST4.03ch02pos29947674.1	2	29947674	C/T	C/T	C/T	C/C	C/T	C/T	C/T	C/T	C/C	C/C	C/C	C/C	C/C	C/T	C/T	C/C	C/C	C/T	C/T	C/T	C/T	C/T	C/C	C/C	C/C	C/T	C/T	C/C	C/T	C/T	C/C	C/T	C/C	C/T	C/T	C/T	C/T	C/T	C/C	C/T	C/C	C/T	C/T	C/T	C/T	C/T	C/C
ST4.03ch02pos29947710.1	2	29947710	A/G	A/G	A/G	A/G	A/G	A/G	A/A	A/G	A/G	A/G	A/G	A/G	A/G	A/G	A/A	A/G	A/G	A/G	A/G	A/G	A/G	A/G	A/G	A/G	A/G	A/G	A/G	A/G	A/G	A/G	A/G	A/G	NA	A/G	A/G	A/G	A/G	A/G	NA	A/G	A/G	A/G	A/G	A/G	A/G	A/A	G/G
ST4.03ch02pos29987314.1	2	29987314	A/A	A/A	A/T	A/T	A/T	A/T	A/T	A/T	A/A	A/T	A/T	A/T	A/T	A/T	NA	A/T	A/A	A/T	A/A	A/T	NA	NA	NA	A/T	A/T	A/T	A/T	A/T	A/T	A/T	A/T	A/T	NA	A/T	A/T	A/T	A/T	A/T	T/T	A/T	A/T	A/T	A/T	A/T	A/T	A/A	T/T
ST4.03ch02pos29987321.1	2	29987321	C/C	C/C	C/A	C/A	C/A	C/A	C/A	C/A	C/C	C/A	C/A	C/A	C/A	C/A	NA	C/A	C/C	C/A	C/C	C/A	NA	NA	NA	C/A	C/A	C/A	C/A	C/A	C/A	C/A	C/A	C/A	NA	C/A	C/A	C/A	C/A	C/A	A/A	C/A	C/A	C/A	C/A	C/A	C/A	C/C	A/A
ST4.03ch02pos29989404.1	2	29989404	NA	NA	C/T	C/T	C/T	C/T	C/T	C/T	C/C	C/T	C/T	C/T	C/T	C/T	C/C	C/T	C/C	C/T	C/C	C/T	NA	C/T	C/T	C/T	T/T	NA	C/T	C/T	C/T	C/T	C/T	C/T	NA	C/T	C/T	C/T	C/T	C/T	T/T	C/T	T/T	C/T	C/T	C/T	C/T	C/C	T/T
ST4.03ch02pos29989432.1	2	29989432	T/T	NA	T/C	T/C	T/C	T/C	T/C	T/C	T/T	T/C	T/C	T/C	T/C	T/C	T/T	T/C	T/T	T/C	T/T	T/C	NA	T/C	T/C	T/C	T/C	NA	T/C	T/C	T/C	T/C	T/C	T/C	NA	T/C	T/C	T/C	T/C	T/C	C/C	T/C	T/C	T/C	T/C	T/C	T/C	T/T	C/C
ST4.03ch02pos30114979.1	2	30114979	G/A	G/A	G/A	G/G	G/A	G/A	G/A	G/A	G/G	G/G	G/G	G/G	G/G	G/A	A/A	G/G	G/G	G/A	G/A	G/A	G/A	G/A	G/G	G/G	G/G	G/A	G/A	G/G	G/A	G/A	G/G	G/A	G/G	G/A	G/A	G/A	G/A	G/A	G/G	G/A	G/G	G/A	G/A	G/A	G/A	A/A	G/G
ST4.03ch02pos30120119.1	2	30120119	G/T	NA	G/G	G/G	G/G	G/T	G/G	G/T	G/G	G/G	G/G	G/G	G/G	G/T	G/G	G/G	G/G	G/G	G/G	G/G	G/G	G/G	G/G	G/G	G/T	G/G	G/G	G/T	G/G	G/G	G/G	G/G	G/G	G/G	G/G	G/G	G/G	G/G	G/G	G/G	G/G	G/G	G/G	G/G	G/G	G/G	G/T
ST4.03ch02pos30120157.1	2	30120157	T/C	T/C	T/T	T/T	T/T	T/C	T/T	T/C	T/C	T/T	T/T	T/T	T/T	T/C	T/T	T/T	T/T	T/T	T/T	T/T	T/T	T/T	T/T	T/T	T/C	T/C	T/T	T/C	T/C	T/C	T/T	T/T	T/C	T/T	T/T	T/C	T/T	T/T	T/T	T/T	T/C	T/T	T/T	T/T	T/T	T/T	T/C
ST4.03ch02pos30122515.1	2	30122515	A/A	NA	A/A	A/A	NA	A/A	A/T	A/A	A/A	A/A	A/A	A/A	A/A	A/A	T/T	A/A	A/A	A/A	A/A	NA	A/A	A/A	A/A	A/A	A/A	A/A	A/A	A/A	A/A	A/A	A/A	A/A	A/A	A/A	A/A	A/A	A/A	NA	A/A	A/A	A/A	A/A	A/A	A/A	A/A	T/T	A/A
ST4.03ch02pos30122551.1	2	30122551	A/A	C/A	C/C	C/C	C/C	A/A	C/C	A/A	C/A	C/C	C/C	C/C	C/C	A/A	C/C	C/C	C/C	C/C	C/C	C/C	C/C	C/C	C/C	C/C	C/A	C/A	C/C	C/A	C/A	C/A	C/C	C/C	C/A	C/C	C/C	C/A	NA	C/C	C/C	C/C	C/A	C/C	C/C	C/C	C/C	C/C	C/A
ST4.03ch02pos30122578.1	2	30122578	T/T	C/T	C/C	C/C	C/C	T/T	C/C	T/T	C/T	C/C	C/C	C/C	C/C	T/T	C/C	C/C	C/C	C/C	C/C	C/C	C/C	C/C	C/C	C/C	C/T	C/T	C/C	C/T	C/T	C/T	C/C	C/C	C/T	C/C	C/C	C/T	NA	C/C	C/C	C/C	C/T	C/C	C/C	C/C	C/C	C/C	C/T
ST4.03ch02pos30125047.1	2	30125047	T/T	T/T	T/T	T/T	T/T	T/A	T/T	T/A	T/A	T/T	T/T	T/T	T/T	T/A	T/T	T/T	T/T	T/T	T/T	T/T	T/T	T/T	T/T	T/T	T/T	T/A	T/T	T/A	T/A	T/T	T/T	T/T	T/T	T/T	T/T	T/T	T/T	T/T	T/T	T/T	T/T	T/T	T/T	T/T	T/T	T/T	T/A
ST4.03ch02pos30125072.1	2	30125072	C/T	C/T	C/T	C/T	C/T	C/T	C/T	C/T	C/C	C/T	C/T	C/C	C/C	C/T	T/T	C/C	C/T	C/T	C/T	C/T	C/T	C/T	C/C	C/C	C/C	C/T	C/T	C/C	NA	C/T	C/C	C/T	C/C	C/T	C/T	C/T	C/T	C/T	C/C	C/T	C/C	C/T	C/T	C/T	C/T	T/T	C/C
ST4.03ch02pos30125085.1	2	30125085	G/T	G/T	G/T	G/G	G/T	G/T	G/T	G/T	G/G	G/G	G/G	G/G	G/G	G/T	T/T	G/G	G/G	G/T	G/T	G/T	G/T	NA	G/G	G/G	G/G	NA	G/T	G/G	G/G	G/T	G/G	G/T	G/G	G/T	G/T	G/T	G/T	G/T	G/G	G/T	G/G	G/T	G/T	G/T	G/G	T/T	G/G
ST4.03ch02pos30125090.1	2	30125090	T/C	T/C	T/C	T/C	T/C	T/C	T/C	T/C	C/C	T/C	T/C	C/C	C/C	T/C	T/T	C/C	T/C	T/C	T/C	T/C	T/C	T/C	C/C	C/C	T/C	T/C	T/C	C/C	T/C	T/C	C/C	T/C	NA	T/C	T/C	T/C	T/C	T/C	C/C	T/C	T/C	T/C	T/C	T/C	T/C	T/T	C/C
ST4.03ch02pos30125108.1	2	30125108	T/C	T/C	T/C	T/C	T/C	T/C	T/C	T/C	T/T	T/C	T/C	T/T	T/T	T/C	C/C	T/T	T/C	T/C	T/C	T/C	T/C	T/C	T/T	T/T	T/T	T/C	T/C	T/T	NA	T/C	T/T	T/C	T/T	T/C	T/C	T/C	T/C	T/C	T/T	T/C	T/T	T/C	T/C	T/C	T/C	C/C	T/T
ST4.03ch02pos30125111.1	2	30125111	G/A	G/A	G/A	G/A	G/A	G/A	G/A	G/A	G/G	G/A	NA	G/G	G/G	G/A	A/A	G/G	G/A	G/A	G/A	G/A	G/A	G/A	G/G	G/G	G/G	G/A	G/A	G/G	NA	G/A	G/G	G/A	G/G	G/A	G/A	G/A	G/A	G/A	G/G	G/A	G/G	G/A	G/A	G/A	G/A	A/A	G/G
ST4.03ch02pos30134016.1	2	30134016	G/C	G/G	G/G	G/G	G/G	G/C	G/G	G/C	G/G	G/G	G/G	G/G	G/G	G/C	G/G	G/G	G/G	G/G	G/G	G/G	G/G	G/G	G/G	G/G	G/C	G/G	G/G	G/C	G/G	G/G	G/G	G/G	G/G	G/G	G/G	G/G	G/G	G/G	G/G	G/G	G/C	G/G	G/G	G/G	G/G	G/G	G/G
ST4.03ch02pos30134025.1	2	30134025	T/C	T/C	T/C	T/C	T/C	T/C	NA	T/C	T/C	T/C	T/C	T/C	T/C	T/C	C/C	T/C	T/C	T/C	T/C	T/C	T/C	T/C	T/C	T/C	T/C	T/C	T/C	T/C	T/C	T/C	T/C	T/C	T/C	T/C	T/C	T/C	T/C	T/C	T/C	T/C	T/C	T/C	T/C	T/C	T/C	C/C	T/C
ST4.03ch02pos30134034.1	2	30134034	T/C	T/C	T/C	T/C	T/C	T/C	T/C	T/C	T/C	T/C	T/C	T/C	T/C	T/C	T/C	T/C	NA	T/C	T/C	T/C	T/C	T/C	T/C	T/C	T/C	T/C	T/C	T/C	T/C	T/C	T/C	T/C	T/C	T/C	T/C	T/C	T/C	T/C	T/C	T/C	T/C	T/C	T/C	T/C	T/C	T/C	T/C
ST4.03ch02pos30134112.1	2	30134112	T/T	C/T	C/T	C/T	C/T	T/T	C/T	T/T	NA	C/T	C/T	C/T	C/C	T/T	T/T	C/C	C/T	C/T	C/T	C/T	C/T	C/T	C/C	C/C	C/T	C/T	C/T	C/T	NA	C/T	C/C	C/T	C/C	C/T	C/T	C/T	C/T	C/T	C/C	C/T	C/T	C/T	C/T	C/T	C/T	T/T	C/T
ST4.03ch02pos30134137.1	2	30134137	G/T	G/T	G/G	G/G	G/T	G/T	G/T	G/T	G/G	G/G	G/G	G/G	G/G	G/T	T/T	G/G	G/G	G/T	G/T	G/T	G/T	G/G	G/G	G/G	G/G	NA	G/T	G/G	NA	G/T	G/G	G/T	G/G	G/T	G/T	G/T	G/T	G/T	G/G	G/T	G/G	G/T	G/T	G/T	G/G	T/T	G/G
ST4.03ch02pos30134154.1	2	30134154	T/G	T/G	T/G	T/G	T/G	T/G	T/G	NA	T/T	T/G	T/G	T/G	T/T	T/G	G/G	T/T	T/G	T/G	T/G	T/G	T/G	T/G	T/T	T/T	T/T	T/G	T/G	T/T	T/G	T/G	T/T	T/G	T/T	T/G	T/G	T/G	T/G	T/G	T/T	T/G	T/T	T/G	T/G	T/G	T/G	G/G	T/T
ST4.03ch02pos30134160.1	2	30134160	C/C	T/C	T/C	T/C	C/C	C/C	C/C	C/C	C/C	T/C	T/C	T/C	C/C	C/C	C/C	C/C	T/C	T/C	C/C	C/C	C/C	T/C	C/C	C/C	C/C	T/C	C/C	C/C	C/C	T/C	C/C	C/C	C/C	C/C	C/C	C/C	C/C	C/C	C/C	C/C	C/C	C/C	T/C	C/C	T/C	C/C	C/C
ST4.03ch02pos30152302.1	2	30152302	C/C	T/C	T/T	T/T	T/T	C/C	T/T	C/C	T/C	T/T	T/T	T/T	T/T	C/C	NA	T/T	T/T	T/T	T/T	T/T	T/T	T/T	T/T	T/T	T/C	T/C	T/T	T/C	T/C	T/T	T/T	T/T	T/T	T/T	T/T	T/C	T/T	T/T	T/T	T/T	T/C	T/T	T/T	T/T	T/T	NA	T/C
ST4.03ch02pos30475735.1	2	30475735	C/C	C/C	C/C	C/C	C/C	C/C	NA	C/C	C/C	C/C	C/C	C/C	C/C	C/C	C/C	C/C	C/C	C/C	C/C	C/G	C/C	C/C	C/C	C/C	C/G	C/C	C/C	C/C	C/C	C/G	C/C	C/C	C/C	C/C	C/C	C/C	C/C	C/C	C/G	C/C	C/G	C/C	C/C	C/C	C/C	C/C	C/C
ST4.03ch02pos30525625.1	2	30525625	T/C	T/C	T/C	T/C	T/C	T/T	T/T	T/T	T/C	T/C	T/C	T/C	C/C	T/T	T/T	C/C	T/C	T/C	T/C	T/T	T/C	T/C	C/C	C/C	T/C	T/C	T/C	T/C	T/C	T/C	C/C	T/C	C/C	T/C	T/C	T/C	T/C	T/C	T/C	T/C	T/C	T/C	T/C	T/C	T/C	T/T	T/C
ST4.03ch02pos30800860.1	2	30800860	C/C	C/T	C/C	C/C	C/T	C/C	C/C	C/T	C/T	C/C	C/C	C/C	C/T	C/C	C/C	C/T	C/C	C/C	C/T	C/C	NA	C/C	C/T	C/T	C/C	C/T	C/T	T/T	C/T	C/T	C/C	C/C	C/C	C/C	C/C	C/T	C/C	C/T	NA	T/T	C/C	C/T	C/C	C/C	C/C	C/C	C/T
ST4.03ch02pos31211962.1	2	31211962	T/T	NA	C/T	C/T	C/T	T/T	T/T	C/T	C/T	C/T	C/T	C/T	NA	T/T	NA	C/T	C/T	C/T	C/T	T/T	T/T	NA	C/T	C/T	C/T	C/T	C/T	C/C	C/T	C/T	T/T	T/T	NA	C/T	C/T	C/T	T/T	C/T	T/T	C/C	C/T	C/T	C/T	C/T	C/T	T/T	C/T
ST4.03ch02pos31211968.1	2	31211968	T/T	NA	A/T	A/T	A/T	T/T	T/T	A/T	A/T	A/T	A/T	A/T	NA	T/T	NA	A/T	A/T	A/T	A/T	T/T	T/T	NA	A/T	A/T	A/T	A/T	A/T	A/A	A/T	A/T	T/T	T/T	NA	A/T	A/T	A/T	T/T	A/T	T/T	A/A	A/T	A/T	A/T	A/T	A/T	T/T	A/T
ST4.03ch02pos31211969.1	2	31211969	G/G	NA	A/G	A/G	A/G	G/G	G/G	A/G	A/G	A/G	A/G	A/G	NA	G/G	NA	A/G	A/G	A/G	A/G	G/G	G/G	NA	NA	A/G	A/G	A/G	A/G	A/A	A/G	A/G	G/G	G/G	NA	A/G	A/G	A/G	G/G	A/G	G/G	A/A	A/G	A/G	A/G	A/G	A/G	G/G	A/G
ST4.03ch02pos31247108.1	2	31247108	G/A	NA	G/A	G/G	G/G	G/A	G/A	NA	G/A	G/G	NA	G/G	G/A	G/A	G/A	NA	G/A	G/A	G/A	G/A	G/A	NA	G/A	NA	G/A	NA	NA	NA	G/A	G/A	G/A	G/A	G/G	G/A	G/A	G/A	G/A	G/G	G/G	NA	G/A	G/G	G/A	G/A	G/A	G/A	G/G
ST4.03ch02pos31406980.1	2	31406980	T/C	T/C	T/C	T/T	T/C	T/C	T/C	T/C	T/C	T/T	T/T	T/T	T/T	T/C	T/C	T/T	T/C	T/C	T/C	T/C	T/C	T/T	T/T	T/T	T/T	T/C	T/C	T/C	T/C	T/C	T/C	T/C	T/T	T/C	T/C	T/C	T/C	T/C	T/T	T/C	T/T	T/C	T/C	T/T	T/T	T/C	T/T
ST4.03ch02pos31407013.1	2	31407013	T/A	T/A	T/A	T/T	T/A	T/A	T/A	T/A	T/A	T/T	T/T	T/T	T/T	T/A	T/A	T/T	T/A	T/A	T/A	T/A	T/A	T/T	T/T	T/T	T/T	T/A	T/A	T/A	T/A	T/A	T/A	T/A	T/T	T/A	T/A	T/A	T/A	T/A	T/T	T/A	T/T	T/A	T/A	T/T	T/T	T/A	T/T
ST4.03ch02pos31449294.1	2	31449294	T/T	T/T	T/T	T/T	T/T	T/T	NA	T/T	T/T	T/T	T/T	T/T	T/G	T/T	T/T	T/G	T/T	T/T	T/T	T/T	T/T	T/T	T/G	T/G	T/T	T/T	T/G	T/T	T/T	T/G	T/T	T/T	T/G	T/T	T/T	T/T	T/G	T/T	T/G	T/T	T/T	T/T	T/T	T/G	T/T	T/T	T/T
ST4.03ch02pos31459478.1	2	31459478	G/G	G/G	G/G	G/G	G/G	G/G	G/G	G/G	G/G	G/G	G/G	G/G	G/T	G/G	G/G	NA	G/G	G/G	G/G	G/G	NA	G/G	G/T	NA	G/G	G/G	G/T	G/G	G/G	G/T	G/G	G/G	NA	G/T	G/T	G/G	G/G	G/G	G/T	G/G	G/G	G/G	G/G	G/T	G/G	G/G	G/G
ST4.03ch02pos31459518.1	2	31459518	A/A	A/A	A/A	A/A	A/A	A/A	A/A	A/A	A/A	A/A	A/A	A/A	A/G	A/A	A/A	NA	A/A	A/A	A/A	A/A	NA	A/A	A/G	NA	A/A	A/A	A/G	A/A	A/A	A/G	A/A	A/A	NA	A/G	A/G	A/A	A/A	A/A	A/G	A/A	A/A	A/A	A/A	A/G	A/A	A/A	A/A
ST4.03ch02pos31459537.1	2	31459537	T/T	T/T	T/T	T/T	T/T	T/T	T/T	T/T	T/T	T/T	T/T	T/T	T/C	T/T	T/T	NA	T/T	T/T	T/T	T/T	NA	T/T	T/C	NA	T/T	T/T	T/C	T/T	T/T	T/C	T/T	T/T	NA	T/C	T/C	T/T	T/T	T/T	T/C	T/T	T/T	T/T	T/T	T/C	T/T	T/T	T/T
ST4.03ch02pos31466329.1	2	31466329	C/C	C/C	C/C	C/C	C/C	C/C	NA	C/C	C/C	C/C	C/C	C/C	C/A	C/C	C/C	C/A	C/C	C/C	C/C	C/C	NA	C/C	C/A	C/A	C/C	C/C	C/A	C/C	C/C	NA	C/C	C/C	NA	C/A	C/A	NA	C/A	C/C	NA	C/C	C/C	C/C	C/C	C/A	C/C	C/C	C/C
ST4.03ch02pos31656988.1	2	31656988	C/G	NA	C/C	C/G	C/C	C/C	C/C	C/C	C/C	C/G	C/G	C/G	C/C	C/C	C/C	C/C	C/C	C/C	C/C	C/C	C/G	C/G	C/C	C/C	C/C	C/C	C/C	C/C	C/G	C/G	C/G	C/G	C/C	C/C	C/C	C/G	C/G	C/C	C/G	C/C	C/C	C/C	C/C	C/C	C/G	C/C	C/G
ST4.03ch02pos31657037.1	2	31657037	C/A	C/A	C/A	C/C	C/A	C/C	C/A	C/A	C/A	C/C	C/C	C/C	A/A	C/C	C/A	A/A	C/C	C/A	A/A	A/A	C/A	C/A	NA	A/A	C/C	C/A	C/C	C/C	C/A	C/A	C/C	C/A	A/A	A/A	A/A	C/A	C/A	C/C	C/A	A/A	C/C	C/C	C/A	C/C	C/C	C/A	C/C
ST4.03ch02pos31679438.1	2	31679438	G/A	G/G	G/A	G/G	G/A	G/G	G/A	G/A	G/A	G/G	G/G	G/G	G/A	G/G	G/A	G/A	G/G	G/A	G/A	A/A	NA	G/G	NA	NA	G/G	NA	G/G	G/G	G/A	G/A	G/G	G/A	NA	G/A	G/A	G/A	G/A	G/G	G/A	G/A	G/G	G/G	NA	G/G	G/G	G/A	G/G
ST4.03ch02pos31679796.1	2	31679796	G/A	NA	G/G	G/A	G/G	G/G	G/G	G/G	G/G	G/A	G/A	G/A	G/G	G/G	G/G	G/G	G/G	G/G	G/G	G/G	G/A	G/A	G/G	G/G	G/G	G/G	G/G	G/G	G/A	G/A	G/A	G/A	G/G	G/G	G/G	G/A	G/A	G/G	G/A	G/G	G/G	G/G	G/G	G/G	G/A	G/G	G/A
ST4.03ch02pos31679815.1	2	31679815	A/A	G/A	G/G	G/A	G/G	G/G	G/G	G/G	G/G	G/A	G/A	G/A	G/G	G/G	G/G	G/G	G/G	G/G	G/G	NA	A/A	G/A	G/G	G/G	G/G	G/G	G/G	G/G	G/A	G/A	G/A	A/A	G/G	G/G	G/G	G/A	G/A	G/G	A/A	G/G	G/G	G/G	G/G	G/G	G/A	G/G	G/A
ST4.03ch02pos31679819.1	2	31679819	A/A	A/A	A/A	A/A	A/A	A/A	NA	A/A	A/A	A/A	A/A	A/A	A/G	A/A	A/A	A/G	A/A	A/A	A/G	A/A	A/A	A/A	A/G	A/G	A/G	A/A	A/G	A/G	A/G	NA	A/A	A/A	A/G	A/G	A/G	A/G	A/A	A/A	A/A	A/G	A/G	A/A	A/A	A/G	A/A	A/A	A/A
ST4.03ch02pos31679845.1	2	31679845	T/T	A/T	A/T	A/T	NA	A/A	A/T	A/T	A/T	A/T	A/T	A/T	T/T	A/A	A/T	T/T	A/A	A/T	T/T	T/T	T/T	A/T	NA	T/T	A/T	A/T	A/T	A/T	A/T	A/T	A/T	T/T	T/T	T/T	T/T	A/T	T/T	A/A	T/T	T/T	A/T	A/A	A/T	A/T	A/T	A/T	A/T
ST4.03ch02pos31693060.1	2	31693060	T/T	T/T	T/T	T/T	T/T	T/T	NA	T/T	T/T	T/T	T/T	T/T	T/G	T/T	T/T	T/G	T/T	T/T	T/G	T/T	T/T	T/T	T/G	T/G	T/G	T/T	T/G	T/G	T/G	NA	T/T	T/T	T/G	T/G	T/G	T/G	T/T	T/T	T/T	T/G	T/G	T/T	T/T	T/G	T/T	T/T	T/T
ST4.03ch02pos31714543.1	2	31714543	A/G	NA	A/A	A/G	A/A	A/A	A/A	A/A	A/A	A/G	A/G	A/G	A/A	A/A	A/A	A/A	A/A	A/A	A/A	A/A	A/G	A/G	A/A	A/A	A/A	A/A	A/A	A/A	A/G	A/G	A/G	A/G	A/A	A/A	A/A	A/G	A/G	A/A	A/G	A/A	A/A	A/A	A/A	A/A	A/G	A/A	A/G
ST4.03ch02pos31762074.1	2	31762074	A/G	A/G	A/A	A/G	A/A	A/A	A/G	A/A	A/A	A/G	A/G	A/G	A/G	A/A	A/A	A/G	A/A	A/A	A/G	A/A	A/G	A/G	A/G	A/G	A/G	A/A	A/G	A/G	A/G	A/G	A/G	A/G	A/A	A/A	A/A	A/G	A/G	A/A	A/G	A/G	A/G	A/A	A/A	A/G	A/G	A/A	A/G
ST4.03ch02pos31783926.1	2	31783926	T/T	T/T	T/T	T/T	T/T	T/T	T/T	T/T	T/T	T/T	T/T	T/T	NA	T/T	T/T	T/T	T/T	T/T	T/T	T/T	NA	T/T	NA	NA	C/C	T/T	NA	T/T	T/T	NA	T/T	T/T	NA	T/C	T/C	T/T	T/T	T/T	T/C	T/T	C/C	T/T	T/T	T/T	T/T	T/T	T/T
ST4.03ch02pos31783933.1	2	31783933	T/T	T/T	G/T	G/T	NA	G/G	G/T	G/T	G/T	NA	G/T	G/T	NA	G/G	G/T	T/T	G/G	G/T	T/T	T/T	NA	T/T	NA	NA	T/T	NA	NA	G/G	G/T	NA	G/T	T/T	NA	T/T	T/T	G/T	T/T	G/G	T/T	T/T	T/T	G/G	G/T	G/G	G/T	G/T	G/T
ST4.03ch02pos31783963.1	2	31783963	C/C	C/C	C/C	C/C	C/C	C/C	C/C	C/C	C/C	C/C	C/C	C/C	NA	C/C	C/C	C/C	C/C	C/C	C/C	C/C	NA	C/C	NA	NA	G/G	C/C	NA	C/C	C/C	NA	C/C	C/C	NA	C/G	C/G	C/C	C/C	C/C	C/G	C/C	G/G	C/C	C/C	C/C	C/C	C/C	C/C
ST4.03ch02pos31813489.1	2	31813489	NA	NA	G/G	G/A	G/G	G/G	G/G	G/G	G/G	G/A	G/A	G/A	G/G	G/G	G/G	G/G	G/G	G/G	G/G	G/G	NA	NA	G/G	G/G	NA	G/G	G/G	G/G	NA	G/A	G/A	G/A	NA	G/G	G/G	G/A	G/A	G/G	NA	G/G	G/G	G/G	G/G	G/G	G/A	G/G	G/A
ST4.03ch02pos31813504.1	2	31813504	A/A	A/A	A/A	A/A	A/A	A/A	NA	A/A	A/A	A/A	A/A	A/A	A/G	A/A	A/A	NA	A/A	A/A	NA	A/A	NA	NA	A/G	A/G	A/G	A/A	A/G	A/G	NA	NA	A/A	A/A	NA	A/A	A/A	A/A	A/A	A/A	NA	NA	A/G	A/A	A/A	A/G	A/A	A/A	A/A
ST4.03ch02pos31813519.1	2	31813519	NA	NA	C/C	C/G	C/C	C/C	C/C	C/C	C/C	C/G	C/G	C/G	C/C	C/C	C/C	C/C	C/C	C/C	C/C	C/C	NA	NA	C/C	C/C	NA	C/C	C/C	C/C	NA	C/G	C/G	C/G	NA	C/C	C/C	C/G	C/G	C/C	NA	C/C	C/C	C/C	C/C	C/C	C/G	C/C	C/G
ST4.03ch02pos31813539.1	2	31813539	NA	NA	C/C	C/T	C/C	C/C	C/C	C/C	C/C	C/T	C/T	C/T	C/C	C/C	C/C	C/C	C/C	C/C	C/C	C/C	NA	NA	C/C	C/C	C/C	C/C	C/C	C/C	NA	C/T	C/T	C/T	NA	C/C	C/C	C/T	C/T	C/C	NA	C/C	C/C	C/C	C/C	C/C	C/T	C/C	C/T
ST4.03ch02pos31814323.1	2	31814323	G/G	NA	A/G	A/G	A/G	A/A	A/G	NA	A/G	A/G	A/G	A/G	G/G	A/A	A/G	G/G	A/A	A/G	G/G	G/G	G/G	NA	G/G	G/G	G/G	A/A	G/G	A/G	A/G	A/G	A/G	G/G	NA	G/G	G/G	A/G	G/G	A/A	G/G	G/G	G/G	A/A	A/G	A/G	A/G	A/G	A/G
ST4.03ch02pos31814324.1	2	31814324	C/C	NA	G/C	G/C	G/C	G/G	G/C	NA	G/C	G/C	G/C	G/C	C/C	G/G	NA	C/C	G/G	G/C	C/C	C/C	C/C	NA	C/C	C/C	C/C	G/G	C/C	G/C	G/C	G/C	G/C	C/C	NA	C/C	C/C	G/C	C/C	G/G	C/C	C/C	C/C	G/G	G/C	G/C	G/C	G/C	G/C
ST4.03ch02pos31814387.1	2	31814387	A/G	NA	A/A	A/G	A/A	A/A	A/A	A/A	A/A	A/G	A/G	A/G	A/G	A/A	A/A	A/G	A/A	A/A	A/G	A/A	A/G	NA	A/G	A/G	A/G	A/A	G/G	A/G	A/G	A/G	A/G	A/G	NA	A/G	A/G	A/G	A/G	A/A	G/G	A/G	NA	A/A	A/A	A/G	A/G	A/A	A/G
ST4.03ch02pos31814390.1	2	31814390	C/T	NA	C/C	C/T	C/C	C/C	C/C	C/C	C/C	C/T	C/T	C/T	C/C	C/C	C/C	C/C	C/C	C/C	C/C	C/C	C/T	NA	C/C	C/C	C/T	C/C	C/C	C/C	C/T	NA	C/T	C/T	NA	C/T	C/T	C/T	C/T	C/C	C/T	C/C	NA	C/C	C/C	C/C	C/T	C/C	C/T
ST4.03ch02pos31827035.1	2	31827035	G/T	G/T	G/T	G/G	G/T	G/G	G/T	G/T	G/T	G/G	G/G	G/G	G/T	G/G	G/T	G/T	G/G	G/T	G/T	T/T	G/T	G/G	G/T	G/T	G/G	G/T	G/G	G/G	G/T	G/T	G/G	G/T	G/T	G/T	G/T	G/T	G/T	G/G	G/G	G/T	G/G	G/G	G/T	G/G	G/G	G/T	G/G
ST4.03ch02pos31831290.1	2	31831290	G/G	NA	A/G	A/G	G/G	G/G	G/G	G/G	G/G	A/G	A/G	A/G	A/G	G/G	G/G	A/G	A/G	A/G	A/G	G/G	G/G	A/G	A/G	A/G	A/G	A/G	A/G	A/A	A/G	A/G	G/G	G/G	A/G	A/G	A/G	A/G	G/G	G/G	NA	A/G	A/G	G/G	A/G	A/A	A/G	G/G	A/G
ST4.03ch02pos31831301.1	2	31831301	T/A	NA	T/T	T/A	T/T	T/T	T/T	T/T	T/T	T/A	T/A	T/A	T/T	T/T	T/T	T/T	T/T	T/T	T/T	T/T	T/A	T/A	T/T	T/T	T/T	T/T	T/T	T/T	T/A	T/A	T/A	T/A	T/T	T/T	T/T	T/A	T/A	T/T	NA	T/T	T/T	T/T	T/T	T/T	T/A	T/T	T/A
ST4.03ch02pos31831309.1	2	31831309	A/C	NA	A/C	A/A	C/C	C/C	C/C	C/C	C/C	A/A	A/A	A/A	A/C	C/C	C/C	A/C	A/C	A/C	A/C	C/C	A/C	NA	A/C	A/C	A/A	A/C	A/C	A/A	A/C	A/C	A/C	A/C	A/C	A/C	A/C	A/C	A/C	C/C	A/A	A/C	A/A	C/C	A/C	A/A	A/C	C/C	A/A
ST4.03ch02pos31831322.1	2	31831322	T/T	NA	A/T	A/T	T/T	T/T	T/T	T/T	T/T	A/T	A/T	A/T	A/T	T/T	T/T	A/T	A/T	A/T	A/T	T/T	T/T	A/T	A/T	A/T	A/A	A/T	A/T	A/A	A/T	A/T	T/T	T/T	A/T	A/T	A/T	A/T	NA	T/T	NA	A/T	A/A	T/T	A/T	A/A	A/T	T/T	A/T
ST4.03ch02pos31900375.1	2	31900375	C/C	T/C	T/C	T/C	T/T	T/T	T/C	T/C	T/T	T/C	T/C	T/C	T/C	T/T	T/C	T/C	T/T	T/C	C/C	T/C	C/C	T/C	T/C	T/C	C/C	T/T	T/C	T/C	T/C	T/C	T/C	C/C	T/C	C/C	C/C	T/C	C/C	T/T	C/C	T/C	C/C	T/T	T/C	T/C	T/C	T/C	T/C
ST4.03ch02pos31900442.1	2	31900442	G/G	A/G	A/G	A/G	A/A	A/A	A/G	A/G	A/A	A/G	A/G	A/G	A/G	A/A	A/G	A/G	A/A	A/G	G/G	A/G	G/G	A/G	A/G	A/G	G/G	A/A	A/G	A/G	A/G	A/G	A/G	G/G	A/G	G/G	G/G	A/G	NA	A/A	G/G	A/G	G/G	A/A	A/G	A/G	A/G	A/G	A/G
ST4.03ch02pos32011312.1	2	32011312	G/G	G/G	G/G	G/G	NA	C/C	G/C	G/C	G/C	G/G	G/G	G/G	G/C	C/C	NA	G/C	G/C	G/G	G/G	G/G	G/G	G/G	NA	G/C	G/C	G/C	C/C	G/G	NA	G/C	G/C	G/G	NA	G/G	G/G	G/G	G/G	C/C	NA	G/G	G/C	C/C	G/G	G/C	G/G	G/C	G/G
ST4.03ch02pos32067285.1	2	32067285	C/C	NA	C/C	C/T	C/C	C/C	C/C	C/T	C/C	C/T	C/T	C/T	C/C	C/C	C/C	C/C	C/C	C/C	C/C	C/C	C/T	C/T	C/C	C/C	C/T	C/T	C/C	C/C	C/T	C/T	C/T	C/T	C/T	C/C	C/C	C/T	C/T	C/C	C/T	C/C	C/T	C/C	C/C	C/C	C/T	C/C	C/T
ST4.03ch02pos32067337.1	2	32067337	T/T	NA	T/T	T/C	T/T	T/T	T/T	T/C	T/T	T/C	T/C	T/C	T/T	T/T	T/T	T/T	T/T	T/T	T/T	T/T	T/C	T/C	T/T	T/T	T/C	T/C	T/T	T/T	T/C	T/C	T/C	T/C	T/C	T/T	T/T	T/C	T/C	T/T	T/C	T/T	T/C	T/T	T/T	T/T	T/C	T/T	T/C
ST4.03ch02pos32067358.1	2	32067358	A/A	NA	A/A	A/G	A/A	A/A	A/A	A/G	A/A	A/G	A/G	A/G	A/A	A/A	A/A	A/A	A/A	A/A	A/A	A/A	A/G	A/G	A/A	A/A	A/G	A/G	A/A	A/A	A/G	A/G	A/G	A/G	A/G	A/A	A/A	A/G	A/G	A/A	A/G	A/A	A/G	A/A	A/A	A/A	A/G	A/A	A/G
ST4.03ch02pos32068759.1	2	32068759	T/T	NA	T/T	T/G	T/T	T/T	T/T	T/T	T/T	T/G	T/G	T/G	T/T	T/T	T/T	T/T	T/T	T/T	T/T	T/T	T/G	T/G	T/T	T/T	T/G	T/T	T/T	T/T	T/G	T/G	T/G	T/G	T/T	T/T	T/T	T/G	T/G	T/T	T/G	T/T	T/G	T/T	T/T	T/T	T/G	T/T	T/G
ST4.03ch02pos32270896.1	2	32270896	A/G	A/G	A/A	A/G	A/A	A/A	A/A	A/A	A/G	A/G	A/G	A/G	A/G	A/A	A/A	A/G	A/A	A/A	A/A	A/A	A/G	A/G	A/G	A/G	A/A	A/A	A/A	A/A	A/G	A/G	A/G	A/G	A/A	A/A	A/A	A/G	A/G	A/A	A/G	A/G	A/A	A/A	A/A	A/A	A/G	A/A	A/G
ST4.03ch02pos32270898.1	2	32270898	C/A	C/A	C/C	C/A	C/C	C/C	C/C	C/C	C/A	C/A	C/A	C/A	C/A	C/C	C/C	C/A	C/C	C/C	C/C	C/C	C/A	C/A	C/A	C/A	C/C	C/C	C/C	C/C	C/A	C/A	C/A	C/A	C/C	C/C	C/C	C/A	C/A	C/C	C/A	C/A	C/C	C/C	C/C	C/C	C/A	C/C	C/A
ST4.03ch02pos32670209.1	2	32670209	NA	A/A	A/A	A/A	A/A	A/A	A/C	A/A	A/A	A/C	A/A	A/C	A/C	A/A	A/A	A/C	A/A	A/A	NA	A/A	NA	A/C	A/C	A/C	A/C	A/A	A/C	A/A	A/A	NA	A/A	A/A	A/C	C/C	C/C	A/C	A/A	A/A	A/A	A/A	A/C	A/A	A/A	C/C	A/C	A/A	A/A
ST4.03ch02pos32670210.1	2	32670210	NA	G/G	G/G	G/G	G/G	G/G	G/C	G/G	G/G	G/C	G/G	G/C	G/C	G/G	G/G	G/C	G/G	G/G	NA	G/G	NA	G/C	G/C	G/C	G/C	G/G	G/C	G/G	G/G	NA	G/G	G/G	G/C	C/C	C/C	G/C	G/G	G/G	G/G	G/G	G/C	G/G	G/G	C/C	G/C	G/G	G/G
ST4.03ch02pos32698470.1	2	32698470	A/A	NA	NA	A/A	A/A	A/A	A/A	A/A	A/A	NA	A/A	A/G	A/A	A/A	A/A	NA	A/A	A/A	A/A	A/A	NA	A/G	A/A	A/A	A/G	NA	A/A	A/A	A/A	A/A	A/A	NA	NA	A/G	A/G	A/A	A/A	A/A	A/A	A/A	A/G	A/A	A/A	A/A	A/G	A/A	A/A
ST4.03ch02pos32698488.1	2	32698488	T/T	NA	NA	T/T	T/T	T/T	T/T	T/T	T/T	NA	T/T	T/C	T/T	T/T	T/T	NA	T/T	T/T	T/T	T/T	NA	T/C	T/T	T/T	T/C	NA	T/T	T/T	T/T	T/T	T/T	NA	NA	T/C	T/C	T/T	T/T	T/T	T/T	T/T	T/C	T/T	T/T	T/T	T/C	T/T	T/T
ST4.03ch02pos33201533.1	2	33201533	T/T	NA	T/T	T/T	T/T	NA	NA	T/T	T/T	T/T	T/T	T/T	T/T	T/T	T/T	T/T	T/T	T/T	T/T	T/A	NA	NA	T/T	T/T	T/T	T/T	NA	T/A	T/A	T/T	T/T	T/T	T/T	T/T	T/T	NA	T/T	T/T	T/T	T/A	T/T	T/T	T/T	T/T	T/T	T/T	T/T
ST4.03ch02pos33201541.1	2	33201541	T/T	NA	T/T	T/T	T/G	NA	NA	T/T	T/T	T/G	T/T	NA	NA	T/T	T/T	T/G	T/T	T/T	T/G	T/G	NA	NA	T/G	NA	T/G	T/T	NA	T/T	NA	NA	T/T	T/T	T/T	T/G	T/G	NA	T/T	NA	T/G	T/T	T/G	T/G	T/T	T/G	T/G	T/T	T/T
ST4.03ch02pos33201542.1	2	33201542	G/G	NA	C/G	C/G	G/G	NA	G/G	G/G	G/G	G/G	NA	G/G	G/G	G/G	G/G	G/G	C/G	C/G	G/G	G/G	NA	NA	G/G	G/G	G/G	C/G	NA	C/G	C/G	C/G	G/G	G/G	C/C	G/G	G/G	C/G	C/G	G/G	G/G	G/G	G/G	G/G	C/G	C/G	G/G	G/G	C/G
ST4.03ch02pos33201569.1	2	33201569	T/T	NA	A/T	A/T	A/T	NA	NA	T/T	T/T	A/T	NA	NA	NA	T/T	T/T	NA	A/T	A/T	A/T	A/A	NA	NA	A/T	NA	NA	A/T	NA	A/A	A/T	A/T	T/T	T/T	A/A	A/T	A/T	A/T	A/T	NA	A/T	A/T	A/T	A/T	A/T	A/A	A/T	T/T	A/T
ST4.03ch02pos33272102.1	2	33272102	A/A	NA	A/A	A/A	A/A	A/A	A/A	A/A	A/A	A/A	A/A	A/A	A/A	A/A	A/A	A/A	A/A	A/A	A/A	A/G	NA	NA	A/A	A/A	A/A	A/A	A/A	A/A	NA	A/A	A/A	A/A	NA	A/A	A/A	NA	A/A	A/A	A/A	A/A	A/A	A/A	A/A	A/A	A/A	A/A	A/A
ST4.03ch02pos33309731.1	2	33309731	T/T	A/T	A/T	A/T	A/T	A/A	A/T	A/A	A/A	T/T	A/T	T/T	A/T	A/A	A/T	A/T	A/A	A/T	A/T	A/T	T/T	T/T	NA	A/T	A/T	A/A	A/A	A/A	A/T	A/T	A/T	T/T	A/A	A/T	A/T	A/T	NA	A/A	A/A	A/T	A/T	A/A	A/T	A/A	NA	A/T	A/T
ST4.03ch02pos33951702.1	2	33951702	T/T	T/T	T/T	T/T	T/T	T/T	T/T	T/T	T/T	T/C	T/T	T/C	C/C	T/T	T/T	C/C	T/T	T/T	T/T	T/C	T/T	T/C	C/C	C/C	T/T	T/T	T/C	T/T	T/T	T/C	T/T	T/T	T/T	T/T	T/T	T/T	T/C	T/T	T/T	T/C	T/T	T/T	T/T	T/T	T/C	T/T	T/T
ST4.03ch02pos34030781.1	2	34030781	C/C	C/C	C/C	C/C	C/T	C/T	C/T	C/T	C/T	C/C	C/C	C/C	C/C	C/T	C/T	C/C	C/C	C/C	C/C	C/T	C/C	C/C	C/C	C/C	C/C	C/T	C/C	C/C	C/C	C/C	C/T	C/C	C/C	C/C	C/C	C/C	C/C	C/T	C/C	C/C	C/C	C/T	C/C	C/C	C/C	C/T	C/C
ST4.03ch02pos34030838.1	2	34030838	A/A	A/A	A/A	A/A	A/G	A/G	A/G	A/G	A/G	A/A	A/A	A/A	A/A	A/G	A/G	A/A	A/A	A/A	A/A	A/G	A/A	A/A	A/A	A/A	A/A	A/G	A/A	A/A	A/A	A/A	A/G	A/A	A/A	A/A	A/A	A/A	A/A	A/G	A/A	A/A	A/A	A/G	A/A	A/A	A/A	A/G	A/A
ST4.03ch02pos34124670.1	2	34124670	T/T	T/A	A/A	A/A	T/A	T/A	NA	A/A	T/A	T/T	A/A	NA	T/T	T/A	A/A	T/T	A/A	A/A	NA	A/A	NA	NA	T/T	T/T	T/A	T/A	T/A	A/A	T/A	T/A	A/A	NA	A/A	A/A	A/A	T/A	NA	T/A	T/A	T/A	T/A	T/A	A/A	A/A	T/A	A/A	A/A
ST4.03ch02pos34124676.1	2	34124676	T/T	T/T	T/T	T/T	T/C	T/C	T/C	T/C	T/C	T/T	T/T	T/T	T/T	T/C	C/C	T/T	T/T	T/T	NA	T/C	NA	NA	T/T	T/T	T/C	T/C	T/T	T/T	T/T	NA	C/C	NA	T/T	T/T	T/T	T/T	T/C	T/C	T/T	T/T	T/C	T/C	T/T	T/T	T/C	C/C	T/T
ST4.03ch02pos34124686.1	2	34124686	A/A	C/A	C/C	C/C	C/A	C/A	NA	C/C	C/A	A/A	C/C	NA	A/A	C/A	C/C	A/A	C/C	C/C	NA	C/C	NA	NA	A/A	A/A	C/A	C/A	C/A	C/C	C/A	C/A	C/C	NA	C/C	C/C	C/C	C/A	NA	C/A	C/A	C/A	C/A	C/A	C/C	C/C	C/A	C/C	C/C
ST4.03ch02pos34124692.1	2	34124692	C/C	T/C	T/T	T/T	T/C	T/C	NA	T/T	T/C	C/C	T/T	NA	C/C	T/C	T/T	C/C	T/T	T/T	NA	T/T	NA	NA	C/C	C/C	T/C	T/C	T/C	T/T	T/C	T/C	T/T	NA	T/T	T/T	T/T	T/C	NA	T/C	T/C	T/C	T/C	T/C	T/T	T/T	T/C	T/T	T/T
ST4.03ch02pos34186464.1	2	34186464	C/C	C/C	C/C	C/C	C/C	C/C	C/C	C/C	C/C	C/T	C/C	C/T	T/T	C/C	C/C	T/T	C/C	C/C	C/C	C/C	C/C	C/T	T/T	T/T	C/T	C/C	C/T	C/C	C/C	C/C	C/C	C/C	C/C	C/C	C/C	NA	C/C	C/C	C/C	C/T	C/T	C/C	C/C	C/C	C/T	C/C	C/C
ST4.03ch02pos34186492.1	2	34186492	C/C	C/C	C/C	C/C	C/C	C/C	C/C	C/C	C/C	C/T	C/C	C/T	T/T	C/C	C/C	T/T	C/T	C/C	C/T	C/C	C/C	C/T	T/T	T/T	C/T	C/C	C/T	C/C	C/C	C/T	C/C	C/C	C/T	C/C	C/C	C/C	NA	C/C	C/C	C/T	C/T	C/C	C/C	C/C	C/T	C/C	C/C
ST4.03ch02pos34222319.1	2	34222319	A/A	A/A	A/A	A/A	A/A	A/A	NA	A/A	A/A	NA	A/A	A/T	T/T	A/A	A/A	T/T	A/T	A/A	A/T	A/A	A/A	NA	NA	T/T	A/T	A/A	A/T	A/A	A/A	A/T	A/A	A/A	NA	A/A	A/A	A/A	NA	A/A	A/A	A/T	A/T	A/A	A/A	A/A	A/T	A/A	A/A
ST4.03ch02pos34222328.1	2	34222328	G/G	G/G	G/G	G/G	G/G	G/G	NA	G/G	G/G	NA	G/G	G/A	A/A	G/G	G/G	A/A	G/A	G/G	G/A	G/G	G/G	NA	NA	A/A	NA	G/G	G/A	G/G	G/G	NA	G/G	G/G	NA	G/G	G/G	G/G	G/G	G/G	G/G	G/A	G/A	G/G	G/G	G/G	G/A	G/G	G/G
ST4.03ch02pos34222372.1	2	34222372	G/G	G/G	G/G	G/G	G/G	G/G	NA	G/G	G/G	NA	G/G	G/A	A/A	G/G	G/G	A/A	G/A	G/G	G/A	G/G	G/G	NA	NA	A/A	G/A	G/G	G/A	G/G	G/G	G/A	G/G	G/G	NA	G/G	G/G	G/G	NA	G/G	G/G	G/A	G/A	G/G	G/G	G/G	G/A	G/G	G/G
ST4.03ch02pos34227231.1	2	34227231	T/T	T/T	T/T	T/T	T/T	T/T	T/T	T/T	T/T	T/T	T/T	T/T	T/T	T/T	T/T	T/T	T/T	T/T	T/T	T/T	T/T	T/T	T/T	T/T	T/G	T/T	T/T	T/T	T/T	T/G	T/T	T/T	T/G	T/G	T/G	T/T	NA	T/T	T/T	T/T	T/G	T/T	T/T	T/T	T/T	T/T	T/T
ST4.03ch02pos34227291.1	2	34227291	C/C	C/C	C/C	C/C	C/C	C/C	C/C	C/C	C/C	C/T	C/C	C/T	T/T	C/C	C/C	T/T	C/T	C/C	C/T	C/C	C/C	C/T	NA	T/T	C/T	C/C	C/T	C/C	C/C	NA	C/C	C/C	C/T	C/C	C/C	NA	C/C	C/C	C/C	C/T	C/T	C/C	C/C	C/C	C/T	C/C	C/C
ST4.03ch02pos34260934.1	2	34260934	G/G	G/G	G/G	G/G	G/G	G/G	G/G	G/G	G/G	G/G	G/G	G/G	G/G	G/G	G/G	G/G	G/G	G/G	G/G	G/G	G/G	G/G	G/G	G/G	G/G	G/G	G/G	G/G	G/G	G/T	G/G	G/G	G/T	G/T	G/T	G/G	G/T	G/G	G/G	G/G	G/G	G/G	G/G	G/G	G/G	G/G	G/G
ST4.03ch02pos34260954.1	2	34260954	A/A	A/A	A/A	A/A	A/A	A/A	A/A	A/A	A/A	A/A	A/A	A/A	A/A	A/A	A/A	A/A	A/G	A/A	A/G	A/A	A/A	A/A	A/A	A/A	A/A	A/A	A/A	A/A	A/A	A/A	A/A	A/A	A/G	A/A	A/A	A/A	A/A	A/A	A/A	A/A	A/A	A/A	A/A	A/A	A/A	A/A	A/A
ST4.03ch02pos34351760.1	2	34351760	A/A	A/G	A/A	A/A	A/A	A/A	A/A	A/A	A/G	A/A	A/A	A/A	A/A	A/A	A/A	A/A	A/A	A/A	A/A	A/A	A/A	A/A	A/A	A/A	A/A	A/G	A/A	A/A	A/A	A/G	A/A	A/A	A/G	A/A	A/A	A/A	A/A	A/A	A/A	A/A	A/A	A/A	A/A	A/A	A/A	A/A	A/A
ST4.03ch02pos34519412.1	2	34519412	C/C	C/C	C/C	C/C	C/C	C/T	C/C	C/C	C/C	C/C	C/C	C/C	C/C	C/T	C/C	C/C	C/C	C/C	C/C	C/C	C/C	C/C	C/C	C/C	C/T	C/C	C/C	C/C	C/C	C/C	C/C	C/C	C/C	C/C	C/C	C/C	C/C	C/C	C/T	C/C	C/T	C/C	C/C	C/C	C/C	C/C	C/C
ST4.03ch02pos34519415.1	2	34519415	G/G	G/G	G/G	G/G	G/G	G/A	G/G	G/G	G/G	G/G	G/G	G/G	G/G	G/A	G/G	G/G	G/G	G/G	G/G	G/G	G/G	G/G	G/G	G/G	G/A	G/G	G/G	G/G	G/G	G/G	G/G	G/G	G/G	G/G	G/G	G/G	G/G	G/G	G/A	G/G	G/A	G/G	G/G	G/G	G/G	G/G	G/G
ST4.03ch02pos34519418.1	2	34519418	C/C	C/C	C/C	C/C	C/C	C/T	C/C	C/C	C/C	C/C	C/C	C/C	C/C	C/T	C/C	C/C	C/C	C/C	C/C	C/C	C/C	C/C	C/C	C/C	C/T	C/C	C/C	C/C	C/C	C/T	C/C	C/C	C/C	C/C	C/C	C/C	C/C	C/C	C/T	C/C	C/T	C/C	C/C	C/C	C/C	C/C	C/C
ST4.03ch02pos34519424.1	2	34519424	A/A	A/A	A/A	A/A	A/A	A/G	A/A	A/A	A/A	A/A	A/A	A/A	A/A	A/G	A/A	A/A	A/A	A/A	A/A	A/A	A/A	A/A	A/A	A/A	A/G	A/A	A/A	A/A	A/A	A/G	A/A	A/A	A/A	A/A	A/A	A/A	NA	A/A	A/G	A/A	A/G	A/A	A/A	A/A	A/A	A/A	A/A
ST4.03ch02pos34606945.1	2	34606945	A/A	A/A	A/A	A/A	A/G	A/G	NA	A/A	A/A	A/G	A/A	A/G	A/G	A/G	A/A	A/G	A/G	A/A	A/G	A/A	A/A	A/G	A/G	A/G	G/G	A/A	A/G	A/A	A/A	A/G	A/A	A/A	A/G	A/G	A/G	A/A	A/G	A/G	A/G	A/G	G/G	A/G	A/A	A/A	A/G	A/A	A/A
ST4.03ch02pos34770889.1	2	34770889	A/A	NA	A/A	A/A	A/A	NA	A/A	A/A	A/A	A/A	A/A	A/A	A/A	A/G	A/A	A/A	A/G	A/A	A/G	A/A	A/A	A/A	A/A	A/A	A/G	A/A	NA	A/A	NA	A/G	A/A	A/A	NA	A/G	A/G	NA	A/G	A/A	NA	A/A	A/G	A/A	A/A	A/A	A/A	A/A	A/A
ST4.03ch02pos34770900.1	2	34770900	A/G	NA	A/G	A/A	A/G	NA	NA	A/G	A/A	A/A	A/A	A/A	A/A	A/G	A/G	A/A	A/A	A/G	A/A	A/G	A/A	A/A	A/A	A/A	A/G	A/G	NA	A/A	A/A	A/G	A/G	A/A	NA	A/A	A/A	A/A	NA	A/G	NA	A/A	A/G	A/G	A/G	A/A	A/G	A/G	A/A
ST4.03ch02pos34904346.1	2	34904346	C/T	C/T	C/T	C/T	C/T	T/T	C/T	T/T	T/T	C/C	C/T	C/C	C/C	T/T	C/T	C/C	T/T	C/T	C/T	C/T	C/C	C/C	C/C	C/C	T/T	T/T	C/T	C/T	C/T	C/T	C/T	C/C	C/T	C/T	C/T	NA	C/T	C/T	T/T	C/C	T/T	C/T	C/T	C/T	NA	C/T	C/T
ST4.03ch02pos34940372.1	2	34940372	C/T	C/T	C/C	C/C	C/T	T/T	C/T	T/T	T/T	C/C	C/C	C/C	C/T	T/T	C/T	C/T	NA	C/C	C/C	T/T	C/C	C/C	C/T	C/T	T/T	T/T	C/C	C/C	NA	C/T	C/T	C/C	C/T	C/T	C/T	NA	C/T	C/T	T/T	C/C	T/T	C/T	C/C	C/C	C/C	C/T	C/C
ST4.03ch02pos35003577.1	2	35003577	C/C	C/C	C/C	C/C	C/C	NA	C/T	NA	NA	C/T	C/C	C/T	T/T	NA	C/C	T/T	NA	C/C	C/C	NA	C/C	C/T	T/T	T/T	NA	NA	T/T	C/C	C/C	C/T	C/C	C/C	C/C	C/C	C/C	C/C	C/C	C/C	T/T	C/T	NA	C/C	C/C	C/C	C/T	C/C	C/C
ST4.03ch02pos35003626.1	2	35003626	C/C	C/C	C/C	C/C	C/C	NA	C/A	NA	NA	C/A	C/C	C/A	A/A	NA	C/C	A/A	NA	C/C	C/C	NA	C/C	C/A	A/A	A/A	NA	NA	A/A	C/C	C/C	C/A	C/C	C/C	C/C	C/C	C/C	C/C	C/C	C/C	A/A	C/A	NA	C/C	C/C	C/C	C/A	C/C	C/C
ST4.03ch02pos35050478.1	2	35050478	G/A	NA	G/G	G/G	G/A	G/G	G/G	G/G	G/G	NA	G/G	G/G	G/G	G/G	NA	G/G	G/G	G/G	G/G	G/G	NA	G/G	NA	NA	G/G	NA	NA	G/G	G/G	NA	G/G	NA	NA	G/G	G/G	G/G	G/G	G/A	G/G	G/G	G/G	G/A	G/G	G/G	G/G	G/G	G/G
ST4.03ch02pos35050497.1	2	35050497	T/A	NA	T/T	T/T	T/A	T/T	T/T	T/T	T/T	NA	T/T	T/T	T/T	T/T	NA	T/T	T/T	T/T	T/T	T/T	NA	T/T	NA	NA	T/T	NA	NA	T/T	T/T	NA	T/T	NA	NA	T/T	T/T	T/T	T/T	T/A	T/T	T/T	T/T	T/A	T/T	T/T	T/T	T/T	T/T
ST4.03ch02pos35062592.1	2	35062592	A/A	A/A	A/G	A/G	A/A	A/G	A/A	A/G	A/G	A/A	A/G	A/A	A/A	A/G	A/A	A/A	A/G	A/G	A/A	A/A	A/A	A/A	A/A	A/A	A/G	A/G	A/G	A/G	A/G	A/A	A/A	A/A	A/A	A/A	A/A	A/A	A/A	A/A	A/A	A/A	A/G	A/A	A/G	A/G	A/A	A/A	A/G
ST4.03ch02pos35062601.1	2	35062601	C/C	C/C	C/T	C/T	C/C	C/T	C/C	C/T	C/T	C/C	C/T	C/C	C/C	C/T	C/C	C/C	C/T	C/T	C/C	C/C	C/C	C/C	C/C	C/C	C/T	C/T	C/T	C/T	C/T	C/C	C/C	C/C	C/C	C/C	C/C	C/C	C/C	C/C	C/C	C/C	C/T	C/C	C/T	C/T	C/C	C/C	C/T
ST4.03ch02pos35071593.1	2	35071593	G/G	NA	G/C	G/C	G/G	G/C	G/G	G/C	G/C	G/G	G/C	G/G	G/G	G/C	G/G	G/G	G/C	G/C	G/G	G/G	G/G	G/G	G/G	G/G	G/C	G/C	G/C	G/C	G/C	G/C	G/G	G/G	G/C	G/C	G/C	NA	NA	G/G	G/G	G/G	G/C	G/G	G/C	G/C	G/G	G/G	G/C
ST4.03ch02pos35071602.1	2	35071602	C/C	NA	C/C	C/C	C/C	C/C	NA	C/C	C/C	C/T	C/C	C/T	C/T	C/C	C/C	C/T	C/C	C/C	C/C	C/C	C/C	NA	C/T	C/T	C/C	C/C	C/T	C/C	C/C	NA	C/C	C/C	C/C	C/C	C/C	NA	C/C	C/C	NA	C/T	C/C	C/C	C/C	C/C	C/T	C/C	C/C
ST4.03ch02pos35071655.1	2	35071655	A/A	NA	A/G	A/G	A/A	A/G	A/A	A/G	A/G	A/A	A/G	A/A	A/A	A/G	A/A	A/A	A/G	A/G	A/A	A/A	A/A	A/A	A/A	A/A	A/G	A/G	A/G	A/G	A/G	A/G	A/A	A/A	A/G	A/G	A/G	NA	NA	A/A	A/A	A/A	A/G	A/A	A/G	A/G	A/A	A/A	A/G
ST4.03ch02pos35071664.1	2	35071664	A/C	A/C	A/A	A/A	A/C	A/A	A/A	A/A	A/A	A/A	A/A	A/A	A/A	A/A	A/A	A/A	A/A	A/A	A/A	A/A	A/A	A/A	NA	A/A	A/A	NA	A/A	A/A	A/A	NA	A/A	A/A	A/A	A/A	A/A	A/A	A/A	A/C	A/A	A/A	A/A	A/C	A/A	A/A	A/A	A/A	A/A
ST4.03ch02pos35341702.1	2	35341702	G/G	G/G	G/G	G/A	G/G	G/G	NA	G/G	G/A	G/A	G/A	G/A	G/A	G/G	G/G	G/A	G/A	G/G	G/A	G/A	G/A	NA	NA	G/A	G/A	G/G	G/G	G/G	NA	G/A	G/A	G/A	NA	G/A	G/A	G/A	G/A	G/G	G/A	G/G	G/A	G/G	G/G	G/G	G/A	G/G	G/A
ST4.03ch02pos35341706.1	2	35341706	A/A	A/A	A/A	A/T	A/A	A/A	NA	A/A	A/T	A/T	A/T	A/T	A/T	A/A	A/A	A/T	A/T	A/A	A/T	A/T	A/T	NA	NA	A/T	A/T	A/A	A/A	A/A	NA	A/T	A/T	A/T	A/A	A/A	A/A	A/T	A/T	A/A	A/A	A/A	A/T	A/A	A/A	A/A	A/T	A/A	A/T
ST4.03ch02pos35341709.1	2	35341709	T/T	T/T	T/T	T/C	T/T	T/T	NA	T/T	T/C	T/C	T/C	T/C	T/C	T/T	T/T	T/C	T/C	T/T	T/C	T/C	T/C	NA	NA	T/C	T/C	T/T	T/T	T/T	NA	T/C	T/C	T/C	NA	T/C	T/C	T/C	T/C	T/T	T/C	T/T	T/C	T/T	T/T	T/T	T/C	T/T	T/C
ST4.03ch02pos35341950.1	2	35341950	A/G	A/G	A/A	A/G	A/G	A/A	A/G	A/A	A/G	G/G	A/G	G/G	G/G	A/A	A/A	G/G	A/G	A/A	A/G	A/G	A/G	G/G	G/G	G/G	G/G	A/G	A/G	A/A	A/G	A/G	A/G	A/G	A/G	A/G	A/G	A/G	A/G	A/G	G/G	A/G	G/G	A/G	A/A	A/A	A/G	A/A	A/G
ST4.03ch02pos35356779.1	2	35356779	T/C	T/C	T/T	T/C	T/C	T/T	T/C	T/T	T/C	C/C	T/C	C/C	C/C	T/T	T/T	C/C	T/C	T/T	T/C	T/C	T/C	C/C	C/C	C/C	C/C	T/T	T/C	T/T	T/C	T/C	T/C	T/C	T/C	T/T	T/T	T/C	T/C	T/C	T/C	T/C	C/C	T/C	T/T	T/T	T/C	T/T	T/C
ST4.03ch02pos35903540.1	2	35903540	T/T	T/T	T/T	T/T	T/T	T/T	T/T	T/T	T/T	T/T	T/T	T/T	T/T	T/T	T/T	T/T	NA	T/T	T/T	T/T	T/T	T/T	T/T	T/T	T/T	T/T	NA	NA	T/T	T/G	T/T	T/T	NA	T/T	T/T	T/T	T/G	T/T	NA	NA	T/T	T/T	T/T	NA	T/T	T/T	T/T
ST4.03ch02pos35932685.1	2	35932685	G/G	G/G	G/G	G/G	G/G	G/G	G/G	G/G	G/G	G/G	G/G	G/G	G/G	G/G	G/G	G/G	G/C	G/G	G/C	G/G	G/G	G/G	G/G	G/G	G/G	G/G	G/G	G/G	G/G	G/C	G/G	G/G	C/C	G/C	G/C	G/G	NA	G/G	G/C	G/G	G/G	G/G	G/G	G/G	G/G	G/G	G/G
ST4.03ch02pos35932736.1	2	35932736	T/T	T/T	T/T	T/T	T/T	T/T	T/T	T/T	T/T	T/T	T/T	T/T	T/T	T/T	T/T	T/T	T/A	T/T	T/A	T/T	T/T	T/T	T/T	T/T	T/T	T/T	T/T	T/T	T/T	T/A	T/T	T/T	A/A	T/A	T/A	T/T	NA	T/T	A/A	T/T	T/T	T/T	T/T	T/T	T/T	T/T	T/T
ST4.03ch02pos35993666.1	2	35993666	A/A	A/A	A/A	G/G	A/A	A/A	NA	A/A	G/G	G/G	G/G	G/G	G/G	A/A	A/A	G/G	G/G	A/A	A/G	A/G	NA	NA	NA	G/G	A/A	A/A	NA	NA	A/G	A/G	A/G	A/G	NA	A/G	A/G	A/G	A/G	A/A	A/A	NA	A/A	A/A	A/A	NA	A/G	A/A	G/G
ST4.03ch02pos35993676.1	2	35993676	C/C	C/C	C/C	T/T	C/C	C/C	NA	C/C	T/T	T/T	T/T	T/T	T/T	C/C	C/C	T/T	T/T	C/C	C/T	C/T	NA	NA	NA	T/T	C/T	C/C	NA	NA	C/T	C/T	C/T	C/T	NA	C/T	C/T	C/T	C/T	C/C	C/C	NA	C/T	C/C	C/C	NA	C/T	C/C	T/T
ST4.03ch02pos35993681.1	2	35993681	A/A	A/A	A/A	A/A	A/A	A/A	A/A	A/A	A/A	A/A	A/A	A/A	A/A	A/A	A/A	A/A	A/A	A/A	A/A	A/A	A/A	A/A	A/A	A/A	A/G	A/A	NA	NA	A/A	A/G	A/A	A/A	A/A	A/A	A/A	A/A	A/A	A/A	G/G	NA	A/G	A/A	A/A	NA	A/A	A/A	A/A
ST4.03ch02pos35993684.1	2	35993684	G/G	G/G	G/G	A/A	G/G	G/G	NA	G/G	A/A	A/A	A/A	A/A	A/A	G/G	G/G	A/A	A/A	G/G	G/A	G/A	NA	NA	NA	A/A	G/A	G/G	NA	NA	G/A	G/A	G/A	G/A	NA	G/A	G/A	G/A	G/A	G/G	G/G	NA	G/A	G/G	G/G	NA	G/A	G/G	A/A
ST4.03ch02pos35993715.1	2	35993715	C/C	C/C	C/C	T/T	C/C	C/C	NA	C/C	T/T	T/T	T/T	T/T	T/T	C/C	C/C	T/T	T/T	C/C	C/T	C/T	NA	NA	NA	T/T	C/T	C/C	NA	NA	C/T	C/T	C/T	C/T	NA	C/T	C/T	C/T	C/T	C/C	C/C	NA	C/T	C/C	C/C	NA	C/T	C/C	T/T
ST4.03ch02pos36063447.1	2	36063447	C/T	C/T	C/T	C/T	C/T	C/T	C/T	C/T	C/T	C/T	C/T	C/T	C/T	C/T	C/C	C/T	C/T	C/T	C/C	C/C	C/C	C/T	C/T	C/T	C/C	C/T	T/T	T/T	C/T	C/T	C/C	C/C	C/T	C/T	C/T	C/T	C/C	C/T	C/C	T/T	C/C	C/T	C/T	T/T	C/T	C/C	C/T
ST4.03ch02pos36131999.1	2	36131999	T/T	T/T	T/T	T/G	T/T	T/T	T/T	T/T	T/G	T/G	T/G	T/G	T/G	T/T	NA	T/G	T/T	T/T	T/T	NA	T/G	T/G	NA	T/G	T/G	T/T	NA	T/T	NA	NA	T/G	NA	NA	T/T	T/T	T/G	T/G	T/T	T/T	T/T	T/G	T/T	T/T	T/G	T/G	T/T	T/G
ST4.03ch02pos36132023.1	2	36132023	T/T	T/T	T/T	T/C	T/T	T/T	T/T	T/T	T/C	T/C	T/C	T/C	T/C	T/T	NA	T/C	T/T	T/T	T/T	NA	T/C	T/C	NA	T/C	T/C	T/T	NA	T/T	NA	NA	T/C	NA	NA	T/T	T/T	T/C	T/C	T/T	T/T	T/T	T/C	T/T	T/T	T/C	T/C	T/T	T/C
ST4.03ch02pos36194888.1	2	36194888	A/A	A/A	A/A	A/T	A/A	A/A	A/T	A/A	A/T	A/T	A/T	A/T	A/T	A/A	A/A	A/T	A/A	A/A	A/A	A/T	A/T	A/T	A/T	A/T	A/T	A/A	A/A	A/A	A/T	A/T	A/T	A/T	A/A	A/A	A/A	A/T	A/T	A/A	A/A	A/A	A/T	A/A	A/A	A/T	A/T	A/A	A/T
ST4.03ch02pos36194894.1	2	36194894	A/T	A/T	A/T	T/T	A/T	A/T	A/T	A/T	T/T	T/T	T/T	T/T	T/T	A/T	A/A	T/T	T/T	A/T	A/T	A/T	A/T	NA	T/T	T/T	T/T	A/T	T/T	T/T	A/T	A/T	A/T	A/T	T/T	A/T	A/T	A/T	A/T	A/T	T/T	T/T	T/T	A/T	A/T	T/T	A/T	A/A	T/T
ST4.03ch02pos36194905.1	2	36194905	C/T	C/T	C/T	C/T	C/C	C/T	NA	C/T	C/T	C/T	C/T	C/T	C/T	C/T	C/C	C/T	C/T	C/T	C/C	C/C	C/C	C/T	C/T	C/T	C/T	C/T	T/T	T/T	C/T	C/T	C/C	C/C	C/C	C/C	C/C	C/T	C/C	C/C	C/C	T/T	C/T	C/C	C/T	C/T	C/T	C/C	C/T
ST4.03ch02pos36231610.1	2	36231610	A/A	NA	A/A	A/A	A/G	A/A	A/A	A/A	A/A	A/A	A/A	A/A	A/A	A/A	A/A	A/A	A/G	A/A	A/G	A/A	A/A	A/A	A/A	A/A	A/A	A/G	A/A	A/A	A/A	A/G	A/A	A/A	A/G	A/A	A/A	A/A	A/A	A/G	A/G	A/A	A/A	A/G	A/A	A/A	A/A	A/A	A/A
ST4.03ch02pos36263191.1	2	36263191	A/G	A/G	NA	G/G	A/G	A/G	NA	A/G	G/G	G/G	G/G	G/G	G/G	A/G	A/A	G/G	G/G	A/G	A/G	A/G	A/G	NA	G/G	G/G	G/G	A/G	G/G	G/G	NA	A/G	A/G	A/G	G/G	A/G	A/G	A/G	A/G	A/G	A/G	G/G	G/G	A/G	A/G	G/G	NA	A/A	G/G
ST4.03ch02pos36264056.1	2	36264056	G/G	NA	G/G	G/A	G/G	G/G	NA	G/G	G/A	NA	G/A	G/A	G/A	G/G	G/G	G/A	G/G	G/G	G/G	G/A	G/A	G/A	G/A	NA	G/A	G/G	G/G	G/G	G/A	G/A	G/A	G/A	G/G	G/G	G/G	G/A	G/A	G/G	G/G	G/G	G/A	G/G	G/G	G/A	G/A	G/G	G/A
ST4.03ch02pos36264063.1	2	36264063	A/A	NA	A/A	A/T	A/A	A/A	NA	A/A	A/T	NA	A/T	A/T	A/T	A/A	A/A	A/T	A/A	A/A	A/A	A/T	A/T	A/T	A/T	NA	A/T	A/A	A/A	A/A	A/T	A/T	A/T	A/T	A/A	A/A	A/A	A/T	A/T	A/A	A/A	A/A	A/T	A/A	A/A	A/T	A/T	A/A	A/T
ST4.03ch02pos36345877.1	2	36345877	A/A	NA	A/A	A/A	A/A	A/A	A/A	A/A	A/A	A/A	A/A	A/A	A/C	A/A	A/A	A/C	A/A	A/A	A/A	NA	NA	A/A	A/C	A/C	A/A	A/A	A/A	A/A	A/A	A/A	A/A	A/A	NA	A/A	A/A	A/C	A/A	A/A	A/A	A/A	A/A	A/A	A/A	A/A	A/A	A/A	A/A
ST4.03ch02pos36345906.1	2	36345906	NA	NA	T/C	C/C	T/C	T/C	NA	T/C	C/C	C/C	C/C	C/C	C/C	T/C	T/T	C/C	C/C	T/C	T/C	NA	NA	C/C	C/C	C/C	C/C	T/C	C/C	C/C	T/C	T/C	T/C	NA	NA	T/C	T/C	T/C	T/C	T/C	C/C	C/C	C/C	T/C	T/C	C/C	C/C	T/T	C/C
ST4.03ch02pos36345907.1	2	36345907	G/G	NA	G/G	G/G	G/G	G/G	G/G	G/G	G/G	G/G	G/G	G/G	G/A	G/G	G/G	G/A	G/G	G/G	G/G	NA	NA	G/G	G/A	G/A	G/G	G/G	G/G	G/G	G/G	G/G	G/G	G/G	NA	G/G	G/G	G/A	G/G	G/G	G/G	G/G	G/G	G/G	G/G	G/G	G/G	G/G	G/G
ST4.03ch02pos36345929.1	2	36345929	NA	NA	C/T	T/T	C/T	C/T	NA	C/T	T/T	T/T	T/T	T/T	C/T	C/T	C/C	C/T	T/T	C/T	C/T	C/C	NA	T/T	C/T	C/T	T/T	C/T	T/T	T/T	C/T	C/T	C/T	NA	NA	C/T	C/T	C/T	C/T	C/T	T/T	T/T	T/T	C/T	C/T	T/T	T/T	C/C	T/T
ST4.03ch02pos36623692.1	2	36623692	C/C	NA	C/C	C/C	C/C	C/C	C/T	C/C	C/C	C/C	C/C	C/C	NA	C/C	C/C	C/T	C/C	C/C	C/C	C/T	NA	NA	C/T	NA	C/C	C/C	C/C	C/C	C/C	C/T	C/C	C/C	C/T	C/C	C/C	NA	C/C	C/C	C/C	C/C	C/C	C/C	C/C	C/C	C/C	C/C	C/C
ST4.03ch02pos36623715.1	2	36623715	T/G	NA	T/T	T/T	T/T	T/T	T/G	T/T	T/T	T/T	T/T	T/T	NA	T/T	T/T	T/G	T/G	T/T	T/G	T/G	NA	NA	T/G	NA	NA	NA	T/T	T/T	T/T	T/G	T/T	T/T	NA	T/G	T/G	NA	NA	T/T	T/G	T/T	T/G	T/T	T/T	T/T	T/T	T/T	T/T
ST4.03ch02pos36699559.1	2	36699559	G/C	NA	G/G	G/G	G/G	G/G	G/G	G/G	G/G	G/G	G/G	G/G	G/G	G/G	G/G	G/G	G/G	G/G	G/G	G/G	G/G	G/G	G/G	G/G	NA	G/G	G/G	G/G	G/G	G/C	G/G	G/G	G/C	G/C	G/C	G/G	G/C	G/G	G/C	G/G	G/C	G/G	G/G	G/G	G/G	G/G	G/G
ST4.03ch02pos36699582.1	2	36699582	G/A	G/A	G/A	A/A	G/A	G/A	G/A	G/A	A/A	A/A	A/A	A/A	A/A	G/A	G/G	A/A	A/A	G/A	A/A	G/A	G/A	G/A	NA	A/A	A/A	G/A	A/A	A/A	G/A	G/A	G/A	G/A	A/A	G/A	G/A	G/A	G/A	G/A	A/A	A/A	G/A	G/A	G/A	A/A	G/A	G/G	A/A
ST4.03ch02pos36699601.1	2	36699601	G/G	G/G	G/G	G/G	G/G	G/G	NA	G/G	G/G	G/G	G/G	G/G	G/A	G/G	G/G	G/A	G/G	G/G	G/G	G/A	G/G	G/G	G/A	G/A	G/G	G/G	G/G	G/G	G/G	G/G	G/G	G/G	G/G	G/G	G/G	G/G	G/G	G/G	G/G	G/G	G/G	G/G	G/G	G/G	G/G	G/G	G/G
ST4.03ch02pos36699621.1	2	36699621	T/C	NA	T/T	T/T	T/T	T/T	T/T	T/T	T/T	T/T	T/T	T/T	T/T	T/T	T/T	T/T	T/T	T/T	T/T	T/T	T/T	T/T	T/T	T/T	NA	T/T	T/T	T/T	T/T	T/T	T/T	T/T	T/C	T/T	T/T	T/T	T/T	T/T	T/C	T/T	T/C	T/T	T/T	T/T	T/T	T/T	T/T
ST4.03ch02pos36950486.1	2	36950486	A/A	A/A	A/A	A/A	A/G	A/A	A/G	A/A	A/A	A/G	A/A	A/G	G/G	A/A	A/A	G/G	A/A	A/A	A/A	A/G	NA	NA	NA	G/G	A/G	A/A	A/G	A/A	NA	A/G	A/A	A/A	NA	A/G	A/G	A/G	A/A	A/G	A/A	A/G	A/G	A/G	A/A	A/A	A/G	A/A	A/A
ST4.03ch02pos36950498.1	2	36950498	T/T	T/T	T/T	T/T	T/A	T/T	T/A	T/T	T/T	T/A	T/T	T/A	A/A	T/T	T/T	A/A	T/T	T/T	T/T	T/A	NA	NA	NA	A/A	T/A	T/T	T/A	T/T	NA	T/A	T/T	T/T	NA	T/A	T/A	T/A	T/T	T/A	T/T	T/A	T/A	T/A	T/T	T/T	T/A	T/T	T/T
ST4.03ch02pos36950552.1	2	36950552	G/G	G/G	G/G	G/G	G/A	G/G	G/A	G/G	G/G	G/A	G/G	G/A	A/A	G/G	G/G	A/A	G/G	G/G	G/G	G/A	NA	NA	NA	A/A	G/A	G/G	G/A	G/G	NA	G/A	G/G	G/G	NA	G/A	G/A	G/A	G/G	G/A	G/G	G/A	G/A	G/A	G/G	G/G	G/A	G/G	G/G
ST4.03ch02pos36950563.1	2	36950563	T/T	T/T	T/T	T/T	T/A	T/T	T/A	T/T	T/T	T/A	T/T	T/A	A/A	T/T	T/T	A/A	T/T	T/T	T/T	T/A	NA	NA	NA	A/A	T/A	T/T	T/A	T/A	T/A	T/A	T/T	T/T	NA	T/A	T/A	T/A	T/A	T/A	T/T	A/A	T/A	T/A	T/T	T/T	T/A	T/T	T/T
ST4.03ch02pos36983327.1	2	36983327	A/A	A/A	A/A	A/T	A/T	A/A	A/A	A/A	A/T	A/T	A/T	A/T	A/A	A/A	A/A	A/A	A/T	A/A	A/T	A/A	NA	NA	A/A	A/A	A/A	A/A	A/A	A/A	A/T	A/A	A/T	A/T	A/A	A/A	A/A	A/T	A/T	A/T	A/A	A/A	A/A	A/T	A/A	A/T	A/T	A/A	A/T
ST4.03ch02pos36983328.1	2	36983328	T/T	T/T	T/T	T/C	T/C	T/T	T/T	T/T	T/C	T/C	T/C	T/C	T/T	T/T	T/T	T/T	T/C	T/T	T/C	T/T	NA	NA	T/T	T/T	T/T	T/T	T/T	T/T	T/C	T/T	T/C	T/C	T/T	T/T	T/T	T/C	T/C	T/C	T/T	T/T	T/T	T/C	T/T	T/C	T/C	T/T	T/C
ST4.03ch02pos36983330.1	2	36983330	T/T	T/T	T/T	T/C	T/C	T/T	T/T	T/T	T/C	C/C	T/C	C/C	T/T	T/T	T/T	T/T	T/C	T/T	T/C	T/T	NA	NA	T/T	NA	T/T	T/T	T/T	T/T	T/C	T/T	T/C	T/C	NA	T/T	T/T	T/C	T/C	T/C	T/T	NA	T/T	T/C	T/T	T/C	T/C	T/T	T/C
ST4.03ch02pos36983332.1	2	36983332	A/A	A/A	A/A	A/T	A/T	A/A	A/A	A/A	A/T	T/T	A/T	T/T	A/A	A/A	A/A	A/A	A/T	A/A	A/T	A/A	NA	NA	A/A	NA	A/A	A/A	A/A	A/A	A/T	A/T	A/T	A/T	NA	A/A	A/A	A/T	A/T	A/T	A/A	NA	A/A	A/T	A/A	A/T	A/T	A/A	A/T
ST4.03ch02pos37022465.1	2	37022465	T/T	T/T	T/T	T/T	T/T	T/T	T/T	T/T	T/T	T/T	T/T	T/T	T/T	T/T	T/T	T/T	T/T	T/T	T/T	T/T	T/T	T/T	T/T	T/T	T/C	T/T	T/T	T/C	T/C	T/C	T/T	T/T	T/C	T/C	T/C	T/C	T/T	T/T	T/T	T/C	T/C	T/T	T/T	T/T	T/T	T/T	T/T
ST4.03ch02pos37051186.1	2	37051186	T/T	T/T	T/C	T/C	T/T	T/C	T/T	T/C	T/C	T/T	T/C	T/T	T/C	T/C	T/T	T/C	T/C	T/C	T/T	T/C	T/T	T/T	T/C	T/C	T/T	T/C	T/C	C/C	T/C	T/C	T/T	T/T	T/C	T/T	T/T	T/C	T/T	T/T	T/C	T/C	T/T	T/T	T/C	T/C	T/T	T/T	T/C
ST4.03ch02pos37051204.1	2	37051204	A/T	A/T	A/A	A/T	A/T	A/A	A/A	A/A	A/T	T/T	A/T	T/T	A/A	A/A	A/A	A/A	A/T	A/A	A/T	A/A	A/T	T/T	A/A	A/A	A/A	A/A	A/A	A/A	A/T	A/T	A/T	A/T	A/A	A/A	A/A	A/T	A/T	A/T	A/A	A/A	A/A	A/T	A/A	A/T	A/T	A/A	A/T
ST4.03ch02pos37359666.1	2	37359666	A/A	A/G	G/G	A/G	G/G	G/G	G/G	G/G	A/G	A/A	A/G	A/A	G/G	G/G	NA	G/G	A/G	G/G	A/A	G/G	A/A	A/A	G/G	G/G	G/G	G/G	G/G	G/G	A/G	A/G	A/A	A/A	G/G	NA	NA	A/G	A/G	G/G	A/G	G/G	G/G	G/G	G/G	A/G	A/A	NA	A/G
ST4.03ch02pos37359675.1	2	37359675	G/G	G/A	A/A	G/A	A/A	A/A	A/A	A/A	G/A	G/G	G/A	G/G	A/A	A/A	NA	A/A	G/A	A/A	G/G	A/A	G/G	G/G	A/A	A/A	G/A	A/A	A/A	A/A	G/A	G/A	G/G	G/G	A/A	NA	NA	G/A	G/G	A/A	G/A	A/A	G/A	A/A	A/A	G/A	G/G	NA	G/A
ST4.03ch02pos37371731.1	2	37371731	T/A	NA	T/T	T/A	T/T	T/T	T/T	T/T	T/A	A/A	T/A	A/A	T/T	T/T	T/T	T/T	T/A	T/T	T/A	T/T	T/A	T/A	T/T	T/T	T/T	T/T	T/T	T/T	T/A	T/A	T/A	T/A	T/T	T/T	T/T	T/A	T/A	T/T	T/A	T/T	T/T	T/T	T/T	T/A	T/A	T/T	T/A
ST4.03ch02pos37378804.1	2	37378804	A/A	A/A	A/G	A/G	A/A	A/G	A/A	A/G	A/G	A/A	A/G	A/A	A/A	A/G	A/A	A/A	A/G	A/G	A/A	A/A	NA	A/A	A/A	A/A	G/G	NA	NA	A/G	A/G	A/G	A/A	A/A	G/G	A/G	A/G	A/A	A/G	A/A	A/G	A/A	G/G	A/A	A/G	A/G	A/A	A/A	A/G
ST4.03ch02pos37378821.1	2	37378821	A/A	A/A	A/A	A/A	A/A	A/A	A/A	A/A	A/A	A/A	A/A	A/A	A/A	A/A	A/A	A/A	A/A	A/A	A/A	A/A	NA	A/A	A/A	A/A	A/C	A/A	A/A	A/A	A/A	A/C	A/A	A/A	NA	A/C	A/C	A/A	A/C	A/A	A/A	A/A	A/C	A/A	A/A	A/A	A/A	A/A	A/A
ST4.03ch02pos37416637.1	2	37416637	A/G	A/G	A/A	A/G	A/G	A/A	A/A	A/A	A/G	G/G	A/G	G/G	A/A	A/A	A/A	A/A	A/G	A/A	A/G	A/A	A/G	G/G	A/A	A/A	A/G	A/G	A/A	A/A	A/G	A/G	A/G	A/G	A/A	A/A	A/A	A/G	A/G	A/G	A/G	A/A	A/G	A/G	A/A	A/G	A/G	A/A	A/G
ST4.03ch02pos37445321.1	2	37445321	T/C	NA	T/T	T/C	T/C	T/T	T/T	T/T	T/C	C/C	T/C	C/C	T/T	T/T	NA	T/T	T/C	T/T	NA	T/T	NA	C/C	T/T	T/T	T/C	T/T	T/T	T/T	T/C	T/C	T/C	T/C	NA	T/T	T/T	T/C	T/C	T/C	T/C	T/T	T/C	T/C	T/T	T/C	T/C	T/T	T/C
ST4.03ch02pos37445325.1	2	37445325	T/G	NA	T/T	T/G	T/G	T/T	T/T	T/T	T/G	G/G	T/G	G/G	T/T	T/T	NA	T/T	T/G	T/T	NA	T/T	NA	G/G	T/T	T/T	T/G	T/T	T/T	T/T	T/G	T/G	T/G	T/G	NA	T/T	T/T	T/G	T/G	T/G	T/G	T/T	T/G	T/G	T/T	T/G	T/G	T/T	T/G
ST4.03ch02pos37458040.1	2	37458040	G/G	NA	G/A	A/A	G/G	G/A	G/G	G/A	A/A	NA	A/A	NA	G/G	G/A	G/G	G/G	A/A	G/A	G/G	G/G	G/G	NA	G/G	G/G	G/A	G/A	G/A	G/A	G/A	G/A	G/G	G/G	G/A	G/A	G/A	G/A	G/A	G/G	A/A	G/G	G/A	G/G	G/A	A/A	G/G	G/G	A/A
ST4.03ch02pos37458070.1	2	37458070	A/A	NA	A/G	G/G	A/A	A/G	A/A	A/G	G/G	NA	G/G	NA	A/A	A/G	A/A	A/A	G/G	A/G	A/A	A/A	A/A	A/A	A/A	A/A	A/A	A/G	A/G	A/G	A/G	A/G	A/A	A/A	A/G	A/G	A/G	A/G	A/G	A/A	G/G	A/A	A/A	A/A	A/G	G/G	A/A	A/A	G/G
ST4.03ch02pos37553513.1	2	37553513	C/C	C/C	C/T	C/T	C/T	T/T	C/T	T/T	C/T	C/C	C/T	C/C	C/T	T/T	C/C	C/T	C/T	C/T	C/C	C/T	C/C	C/C	C/T	C/T	C/T	NA	C/T	C/T	C/T	C/T	C/T	C/C	NA	C/T	C/T	C/T	C/T	T/T	C/C	C/C	C/T	T/T	C/T	C/T	C/C	C/C	C/T
ST4.03ch02pos37553529.1	2	37553529	A/A	A/A	A/G	A/G	A/G	G/G	A/G	G/G	A/G	A/A	A/G	A/A	A/G	G/G	A/A	A/G	A/G	A/G	A/A	A/G	A/A	A/A	A/G	A/G	A/G	NA	A/G	A/G	A/G	A/G	A/G	A/A	NA	A/G	A/G	A/G	A/G	G/G	A/A	A/A	A/G	G/G	A/G	A/G	A/A	A/A	A/G
ST4.03ch02pos37575939.1	2	37575939	C/C	C/C	C/T	C/T	NA	T/T	C/C	T/T	C/T	C/C	C/T	C/C	C/C	T/T	C/C	C/C	C/T	C/T	C/C	C/C	C/C	C/C	C/C	C/C	C/C	NA	C/T	T/T	C/T	C/T	C/C	C/C	NA	C/C	C/C	C/T	C/C	NA	C/C	C/C	C/C	NA	C/T	C/T	C/C	C/C	C/T
ST4.03ch02pos37575961.1	2	37575961	G/A	NA	G/G	G/A	NA	G/G	G/G	G/G	G/A	A/A	G/A	A/A	A/A	G/G	G/G	A/A	G/A	G/G	G/A	G/G	G/A	NA	NA	A/A	G/A	G/G	G/A	G/G	NA	G/A	A/A	G/A	NA	G/G	G/G	G/A	G/A	NA	A/A	A/A	G/A	NA	G/G	G/A	NA	G/G	G/A
ST4.03ch02pos37575963.1	2	37575963	A/G	NA	A/A	A/G	NA	A/A	A/A	A/A	A/G	G/G	A/G	G/G	G/G	A/A	A/A	G/G	A/G	A/A	A/G	A/A	A/G	NA	NA	G/G	A/G	A/A	A/G	A/A	NA	A/G	G/G	A/G	NA	A/A	A/A	A/G	A/G	NA	G/G	G/G	A/G	NA	A/A	A/G	NA	A/A	A/G
ST4.03ch02pos37575969.1	2	37575969	T/C	NA	T/C	C/C	NA	C/C	T/T	C/C	C/C	C/C	C/C	C/C	C/C	C/C	T/T	C/C	C/C	T/C	T/C	T/T	T/C	NA	NA	C/C	T/C	NA	C/C	C/C	T/C	T/C	C/C	T/C	NA	T/T	T/T	T/C	T/C	NA	C/C	C/C	T/C	NA	T/C	C/C	NA	T/T	C/C
ST4.03ch02pos37587810.1	2	37587810	A/T	NA	NA	T/T	A/T	T/T	NA	T/T	T/T	T/T	T/T	T/T	T/T	T/T	A/A	T/T	T/T	A/T	A/T	A/T	NA	NA	NA	T/T	T/T	T/T	T/T	T/T	A/T	A/T	T/T	NA	T/T	A/T	A/T	A/T	A/T	T/T	T/T	T/T	T/T	T/T	A/T	T/T	NA	A/A	T/T
ST4.03ch02pos37587816.1	2	37587816	C/C	NA	NA	C/T	C/C	C/T	C/C	C/T	C/T	C/C	C/T	C/C	C/C	NA	C/C	C/C	C/T	C/T	C/C	C/C	NA	NA	NA	C/C	C/C	C/T	NA	NA	NA	C/C	C/C	NA	C/C	C/C	C/C	C/C	C/C	C/C	C/C	C/C	C/C	C/C	C/T	C/T	C/C	C/C	C/T
ST4.03ch02pos37658441.1	2	37658441	G/G	G/G	NA	G/A	G/G	G/A	G/G	G/A	G/A	G/G	G/A	G/G	G/G	G/A	G/G	G/G	G/A	G/A	G/G	G/G	G/G	G/G	NA	G/G	G/G	G/A	G/A	A/A	NA	G/G	G/G	G/G	NA	G/G	G/G	G/G	G/G	G/G	G/G	G/G	G/G	G/G	G/G	G/A	G/G	G/G	G/A
ST4.03ch02pos37863319.1	2	37863319	G/G	NA	G/T	T/T	G/G	G/T	G/G	G/T	T/T	T/T	T/T	T/T	G/T	G/T	G/G	G/T	T/T	G/T	G/T	G/T	G/T	NA	G/T	G/T	G/T	G/T	G/T	T/T	G/T	G/T	G/T	G/T	G/T	G/G	G/G	G/T	G/T	G/G	T/T	G/T	G/T	G/G	G/T	T/T	G/T	G/G	T/T
ST4.03ch02pos37863329.1	2	37863329	C/C	NA	C/T	T/T	C/C	C/T	C/C	C/T	T/T	T/T	T/T	T/T	C/T	C/T	C/C	C/T	T/T	C/T	C/T	C/T	C/T	NA	C/T	C/T	C/T	C/T	C/T	T/T	C/T	C/T	C/T	C/T	C/T	C/C	C/C	C/T	C/T	C/C	T/T	C/T	C/T	C/C	C/T	T/T	C/T	C/C	T/T
ST4.03ch02pos37863332.1	2	37863332	T/T	T/T	T/C	T/C	T/T	T/C	T/T	T/C	T/C	T/T	T/C	T/T	T/C	T/C	T/T	T/C	T/C	T/C	T/T	T/C	T/T	T/T	T/C	T/C	T/T	T/C	T/C	C/C	T/C	NA	T/T	T/T	T/C	T/T	T/T	T/C	T/T	T/T	C/C	T/C	T/T	T/T	T/C	T/C	T/T	T/T	T/C
ST4.03ch02pos37884131.1	2	37884131	T/T	T/T	T/T	T/C	T/T	T/T	T/T	T/T	T/C	C/C	T/C	C/C	T/T	T/T	T/T	T/T	T/C	T/T	T/C	T/T	T/C	T/C	T/T	T/T	T/C	T/T	T/T	T/T	T/C	T/C	T/C	T/C	T/T	T/T	T/T	T/C	T/C	T/T	T/T	T/T	T/C	T/T	T/T	T/C	C/C	T/T	T/C
ST4.03ch02pos38057135.1	2	38057135	C/C	NA	C/C	C/T	C/C	C/C	C/C	C/C	C/T	NA	NA	T/T	C/C	C/C	C/C	C/C	C/T	C/C	C/T	C/C	NA	NA	NA	C/C	C/T	C/C	C/C	C/C	NA	C/T	C/T	NA	NA	C/C	C/C	C/T	C/T	C/C	C/C	C/C	NA	C/C	C/C	C/T	NA	C/C	C/T
ST4.03ch02pos38079203.1	2	38079203	G/G	G/G	G/G	G/G	G/G	G/G	G/A	G/G	G/G	G/G	G/G	G/G	G/A	G/G	G/G	G/A	G/G	G/G	G/G	G/A	G/G	G/G	G/A	G/A	G/G	G/G	G/G	G/G	G/G	G/A	G/G	G/G	G/A	G/G	G/G	G/A	G/G	G/G	G/G	G/G	G/G	G/G	G/G	G/G	G/G	G/G	G/G
ST4.03ch02pos38166857.1	2	38166857	G/G	NA	NA	G/A	G/G	G/G	G/G	G/G	NA	A/A	G/A	A/A	G/G	G/G	NA	G/G	G/A	G/G	NA	G/G	NA	NA	G/G	G/G	NA	G/G	G/G	G/G	NA	G/A	G/A	G/A	G/G	G/G	G/G	G/A	G/A	G/G	G/G	G/G	G/A	G/G	G/G	G/A	NA	G/G	G/A
ST4.03ch02pos38166877.1	2	38166877	A/A	NA	NA	A/G	A/A	A/A	A/A	A/A	NA	G/G	A/G	G/G	A/A	A/A	NA	A/A	A/G	A/A	NA	A/A	NA	NA	A/A	A/A	NA	A/A	A/A	A/A	NA	A/G	A/G	A/G	A/A	A/A	A/A	A/G	A/G	A/A	A/A	A/A	A/G	A/A	A/A	A/G	NA	A/A	A/G
ST4.03ch02pos38166881.1	2	38166881	A/A	NA	NA	A/G	A/A	A/A	A/A	A/A	NA	G/G	A/G	G/G	A/A	A/A	NA	A/A	A/G	A/A	NA	A/A	NA	NA	A/A	A/A	NA	A/A	A/A	A/A	NA	A/G	A/G	A/G	A/A	A/A	A/A	A/G	A/G	A/A	A/A	A/A	A/G	A/A	A/A	A/G	NA	A/A	A/G
ST4.03ch02pos38168332.1	2	38168332	A/A	A/A	A/A	T/T	A/A	A/A	A/A	A/A	A/T	T/T	A/T	T/T	A/A	A/A	NA	A/A	A/T	A/A	A/T	A/A	A/T	T/T	A/A	A/A	A/T	A/A	A/A	A/A	NA	NA	A/T	A/T	A/A	A/A	A/A	A/T	A/T	A/A	A/A	A/A	A/T	A/A	A/A	A/T	T/T	A/A	A/T
ST4.03ch02pos38168340.1	2	38168340	C/C	C/C	C/C	T/T	C/C	C/C	C/C	C/C	C/T	T/T	C/T	T/T	C/C	C/C	NA	C/C	C/T	C/C	C/T	C/C	C/T	T/T	C/C	C/C	C/T	C/C	C/C	C/C	NA	NA	C/T	C/T	C/C	C/C	C/C	C/T	C/T	C/C	C/C	C/C	C/T	C/C	C/C	C/T	T/T	C/C	C/T
ST4.03ch02pos38168353.1	2	38168353	C/C	C/C	C/C	T/T	C/C	C/C	C/C	C/C	C/T	T/T	C/T	T/T	C/C	C/C	NA	C/C	C/T	C/C	C/T	C/C	C/T	T/T	C/C	C/C	C/T	C/C	C/C	C/C	NA	NA	C/T	C/T	C/C	C/C	C/C	C/T	C/T	C/C	C/C	C/C	C/T	C/C	C/C	C/T	T/T	C/C	C/T
ST4.03ch02pos38168374.1	2	38168374	G/G	G/G	G/G	T/T	G/G	G/G	G/G	G/G	G/T	T/T	G/T	T/T	G/G	G/G	NA	G/G	G/T	G/G	G/T	G/G	G/T	T/T	G/G	G/G	G/T	G/G	G/G	G/G	NA	G/T	G/T	G/T	G/G	G/G	G/G	G/T	G/T	G/G	G/G	G/G	G/T	G/G	G/G	G/T	T/T	G/G	G/T
ST4.03ch02pos38220298.1	2	38220298	T/T	T/T	T/T	NA	T/C	T/T	T/T	T/T	T/C	C/C	T/C	C/C	NA	T/T	NA	T/C	T/C	T/T	NA	NA	NA	NA	NA	NA	T/C	T/T	NA	T/T	T/C	T/C	T/C	T/C	NA	T/T	T/T	T/C	T/C	T/C	C/C	NA	T/C	T/C	T/T	T/C	C/C	T/T	T/C
ST4.03ch02pos38220299.1	2	38220299	G/G	G/G	G/G	G/G	G/A	G/G	G/G	G/G	G/G	G/G	G/G	G/G	NA	G/G	NA	G/A	G/G	G/G	G/G	NA	G/G	G/G	NA	NA	G/G	G/G	NA	G/G	G/G	NA	G/G	G/G	NA	G/G	G/G	G/G	G/G	G/A	G/A	G/G	G/G	G/A	G/G	G/G	G/G	G/G	G/G
ST4.03ch02pos38220318.1	2	38220318	T/T	T/T	T/T	NA	T/C	T/T	T/T	T/T	T/C	C/C	T/C	C/C	NA	T/T	NA	T/C	T/C	T/T	NA	NA	NA	NA	NA	NA	T/C	T/T	NA	T/T	T/C	T/C	T/C	T/C	NA	T/T	T/T	T/C	T/C	T/C	C/C	NA	T/C	T/C	T/T	T/C	C/C	T/T	T/C
ST4.03ch02pos38220369.1	2	38220369	A/A	A/A	A/A	NA	A/A	A/A	A/A	A/A	A/G	G/G	A/G	G/G	A/A	A/A	NA	A/A	A/G	A/A	NA	A/A	NA	NA	NA	A/A	A/G	A/A	NA	A/A	A/G	A/A	A/G	A/G	A/A	A/A	A/A	A/G	A/G	A/A	A/G	A/A	A/G	A/A	A/A	A/G	G/G	A/A	A/G
ST4.03ch02pos38220370.1	2	38220370	A/A	A/A	A/A	NA	A/A	A/A	A/A	A/A	A/T	T/T	A/T	T/T	A/A	A/A	NA	A/A	A/T	A/A	NA	A/A	NA	NA	NA	A/A	A/T	A/A	NA	A/A	NA	A/A	A/T	A/T	A/A	A/A	A/A	A/T	A/T	A/A	NA	A/A	A/T	A/A	A/A	A/T	T/T	A/A	A/T
ST4.03ch02pos38329281.1	2	38329281	C/C	C/C	C/C	C/C	C/T	C/C	NA	C/C	C/C	C/C	C/C	C/C	C/T	C/C	C/C	C/T	C/C	C/C	C/C	C/T	C/C	C/C	NA	C/T	C/C	C/C	C/C	C/C	C/C	NA	C/C	C/C	C/T	C/C	C/C	NA	C/C	C/T	C/T	C/C	C/C	C/T	C/C	C/C	C/C	C/C	C/C
ST4.03ch02pos38394565.1	2	38394565	G/G	G/G	G/G	G/G	G/A	G/G	G/G	G/G	G/G	G/G	G/G	G/G	G/G	G/G	G/G	G/G	G/G	G/G	G/G	G/G	G/G	G/G	G/G	G/G	G/G	G/G	G/G	G/G	G/G	G/A	G/G	G/G	G/A	G/G	G/G	G/G	G/G	G/A	G/A	G/G	G/G	G/A	G/G	G/G	G/G	G/G	G/G
ST4.03ch02pos38397869.1	2	38397869	C/C	C/C	C/C	C/C	C/C	C/C	C/C	C/C	C/C	NA	C/C	NA	C/T	C/C	C/C	C/T	C/C	C/C	C/C	C/T	C/C	NA	C/T	C/T	C/C	C/C	C/C	C/C	C/C	C/C	C/C	C/C	C/C	C/C	C/C	C/T	C/C	C/C	C/C	C/C	C/C	C/C	C/C	C/C	C/C	C/C	C/C
ST4.03ch02pos38397880.1	2	38397880	G/G	G/G	G/G	G/G	G/T	G/G	G/G	G/G	G/G	NA	G/G	NA	G/G	G/G	G/G	G/G	G/G	G/G	G/G	G/G	G/G	NA	G/G	G/G	G/G	G/G	G/G	G/G	G/G	G/T	G/G	G/G	G/T	G/G	G/G	G/G	G/G	G/T	G/T	G/G	G/G	G/T	G/G	G/G	G/G	G/G	G/G
ST4.03ch02pos38398532.1	2	38398532	T/T	T/T	T/T	T/C	T/C	T/T	NA	T/T	T/C	C/C	T/C	C/C	T/C	T/T	T/T	T/C	T/C	T/T	T/C	T/C	T/C	NA	T/C	T/C	T/C	T/T	T/T	T/T	T/C	T/C	T/C	T/C	T/C	T/T	T/T	T/C	T/C	T/C	C/C	T/T	T/C	T/C	T/T	T/C	T/C	T/T	T/C
ST4.03ch02pos38398773.1	2	38398773	G/G	G/G	G/G	G/A	G/G	G/G	G/G	G/G	G/A	A/A	G/A	A/A	G/G	G/G	G/G	G/G	G/A	G/G	G/A	G/G	G/A	G/A	G/G	G/G	G/G	G/G	G/G	G/G	G/A	G/A	G/A	G/A	G/G	G/G	G/G	G/A	G/A	G/G	G/G	G/G	G/G	G/G	G/G	G/A	G/A	G/G	G/A
ST4.03ch02pos38537413.1	2	38537413	NA	C/C	C/C	A/A	NA	NA	C/A	C/A	A/A	A/A	A/A	A/A	C/A	C/A	C/C	C/A	A/A	C/C	C/A	C/A	C/A	NA	C/A	C/A	C/A	C/A	A/A	NA	C/A	C/A	C/A	C/A	NA	C/A	C/A	C/A	C/A	C/A	A/A	C/C	C/A	C/C	C/C	A/A	C/A	C/C	A/A
ST4.03ch02pos38546641.1	2	38546641	T/T	T/T	T/T	T/T	T/T	T/T	T/T	T/T	T/T	NA	T/T	NA	C/C	T/T	T/T	NA	T/T	T/T	T/T	T/T	NA	NA	NA	NA	NA	T/T	T/T	T/T	T/T	T/T	T/T	T/T	C/C	T/T	T/T	T/T	T/T	T/T	C/C	NA	NA	T/T	T/T	T/T	T/T	T/T	T/T
ST4.03ch02pos38602425.1	2	38602425	NA	G/A	G/A	G/G	NA	G/G	G/A	G/G	G/G	G/G	G/G	G/G	G/G	NA	NA	G/G	G/G	G/A	G/G	G/G	G/G	G/G	G/G	G/G	G/A	G/A	G/A	G/A	G/A	G/A	G/G	G/G	G/A	G/A	G/A	G/A	G/A	G/G	NA	G/A	G/A	NA	G/A	G/G	G/G	G/G	G/G
ST4.03ch02pos38602449.1	2	38602449	NA	G/A	G/A	G/A	NA	G/G	G/A	NA	G/A	G/A	G/A	G/A	G/A	G/G	NA	G/A	G/A	G/A	G/A	A/A	G/A	G/A	G/A	G/A	G/A	G/A	G/A	G/A	G/A	G/A	G/A	G/A	G/A	G/A	G/A	G/A	G/A	NA	NA	G/A	G/A	NA	G/A	G/A	G/A	G/A	G/A
ST4.03ch02pos38606743.1	2	38606743	G/G	G/G	G/G	G/G	G/G	G/G	G/G	G/G	G/G	G/G	G/G	G/G	G/G	G/G	G/G	G/G	G/G	G/G	G/G	G/G	G/G	G/G	G/G	G/G	G/A	G/G	G/G	G/A	G/G	G/G	G/G	G/G	G/A	G/A	G/A	G/G	G/G	G/G	G/G	G/A	G/A	G/G	G/A	G/G	G/G	G/G	G/G
ST4.03ch02pos38606767.1	2	38606767	G/G	NA	G/A	G/G	G/G	G/G	G/G	G/G	G/G	A/A	G/A	A/A	A/A	G/G	G/G	A/A	G/A	G/G	G/A	G/A	G/A	G/A	G/A	A/A	G/A	G/G	G/G	G/G	NA	G/A	G/A	G/A	G/A	G/A	G/A	G/A	G/A	G/G	G/G	G/A	G/A	G/G	G/G	NA	G/A	G/G	G/G
ST4.03ch02pos38614047.1	2	38614047	A/A	A/A	A/A	G/G	A/A	A/A	A/A	A/A	G/G	G/G	G/G	G/G	A/A	A/A	A/A	A/A	G/G	A/A	A/G	A/A	A/G	G/G	A/A	A/A	A/A	A/A	NA	A/A	A/G	A/G	A/G	A/G	NA	A/A	A/A	A/G	A/G	A/A	A/G	A/A	A/A	A/A	A/A	G/G	NA	A/A	G/G
ST4.03ch02pos38614049.1	2	38614049	A/A	A/A	A/T	A/T	A/A	A/T	A/A	A/T	NA	NA	A/T	A/T	A/A	A/T	A/A	A/A	A/T	A/T	A/A	A/A	A/A	A/A	A/A	A/A	A/T	A/T	T/T	A/T	A/T	A/T	NA	NA	T/T	A/A	A/A	A/T	A/A	A/A	A/A	A/A	A/T	A/A	A/T	A/T	A/T	A/A	A/T
ST4.03ch02pos38614050.1	2	38614050	A/A	A/A	A/G	G/G	A/A	A/G	A/A	A/G	G/G	A/G	G/G	A/G	A/A	A/G	A/A	A/A	G/G	A/G	A/A	A/A	A/A	A/G	A/A	A/A	A/G	A/G	G/G	A/G	A/G	A/G	A/G	NA	G/G	A/A	A/A	A/G	A/A	A/A	A/A	A/A	A/G	A/A	A/G	G/G	A/G	A/A	G/G
ST4.03ch02pos38614052.1	2	38614052	A/A	A/A	A/A	A/T	A/A	A/A	A/A	A/A	A/T	T/T	A/T	T/T	A/A	A/A	A/A	A/A	A/T	A/A	A/T	A/A	A/T	NA	A/A	A/A	A/A	A/A	A/A	A/A	A/T	NA	A/T	A/T	A/A	A/A	A/A	A/T	A/T	A/A	A/T	A/A	A/A	A/A	A/A	A/T	NA	A/A	A/T
ST4.03ch02pos38614053.1	2	38614053	G/G	G/G	G/G	G/C	G/G	G/G	G/G	G/G	G/C	C/C	G/C	C/C	G/G	G/G	G/G	G/G	G/C	G/G	G/C	G/G	G/C	NA	G/G	G/G	G/G	G/G	G/G	G/G	G/C	G/C	G/C	G/C	G/G	G/G	G/G	G/C	G/C	G/G	G/C	G/G	G/G	G/G	G/G	G/C	NA	G/G	G/C
ST4.03ch02pos38614068.1	2	38614068	C/C	C/C	C/C	C/T	C/C	C/C	C/C	C/C	C/T	T/T	C/T	T/T	C/C	C/C	C/C	C/C	C/T	C/C	C/T	C/C	C/T	T/T	C/C	C/C	C/C	C/C	C/C	C/C	C/T	C/T	C/T	C/T	C/C	C/C	C/C	C/T	C/T	C/C	C/T	C/C	C/C	C/C	C/C	C/T	NA	C/C	C/T
ST4.03ch02pos38614070.1	2	38614070	C/C	C/C	C/C	C/G	C/C	C/C	C/C	C/C	C/G	G/G	C/G	G/G	C/C	C/C	C/C	C/C	C/G	C/C	C/G	C/C	C/G	G/G	C/C	C/C	C/C	C/C	C/C	C/C	C/G	C/G	C/G	C/G	C/C	C/C	C/C	C/G	C/G	C/C	C/G	C/C	C/C	C/C	C/C	C/G	NA	C/C	C/G
ST4.03ch02pos38614084.1	2	38614084	G/G	G/C	G/C	G/C	G/G	G/C	G/C	G/C	G/C	G/G	G/C	G/G	C/C	G/C	G/G	C/C	G/C	G/C	G/G	G/C	G/G	G/G	C/C	C/C	G/C	G/C	C/C	C/C	G/C	G/C	G/G	G/G	G/G	G/G	G/G	G/C	G/G	G/G	G/G	C/C	G/C	G/G	G/C	G/C	G/G	G/G	G/C
ST4.03ch02pos38625867.1	2	38625867	T/T	T/G	T/G	G/G	T/T	T/G	T/G	T/G	G/G	G/G	G/G	G/G	G/G	T/G	T/T	G/G	G/G	T/G	T/G	T/G	T/G	NA	G/G	G/G	T/G	T/G	G/G	G/G	T/G	T/G	T/G	T/G	G/G	T/G	T/G	T/G	T/G	T/T	T/G	G/G	T/G	T/T	T/G	G/G	T/G	T/T	G/G
ST4.03ch02pos38648036.1	2	38648036	A/A	A/G	A/G	G/G	A/A	A/G	NA	A/G	G/G	G/G	G/G	G/G	G/G	A/G	NA	G/G	G/G	A/G	A/G	NA	A/G	A/G	NA	G/G	A/G	NA	G/G	G/G	A/G	A/G	A/G	A/G	G/G	A/G	A/G	A/G	A/G	A/A	A/G	G/G	A/G	A/A	A/G	G/G	NA	A/A	G/G
ST4.03ch02pos38648043.1	2	38648043	A/A	A/A	A/A	A/G	A/A	A/A	NA	A/A	A/G	G/G	A/G	G/G	A/G	A/A	NA	A/G	A/G	A/A	A/G	A/A	A/G	A/G	A/G	A/G	A/G	A/A	A/G	A/A	A/G	A/G	A/G	A/G	A/G	A/G	A/G	A/G	A/G	A/A	A/G	A/G	A/G	A/A	A/A	A/G	NA	A/A	A/G
ST4.03ch02pos38648055.1	2	38648055	G/G	NA	G/A	A/A	G/G	G/A	G/G	G/A	A/A	A/A	A/A	A/A	A/A	G/A	NA	A/A	A/A	G/A	G/A	NA	G/A	G/A	NA	A/A	G/G	NA	A/A	A/A	G/A	G/A	G/A	G/A	A/A	G/G	G/G	G/A	G/A	G/G	G/A	A/A	G/G	G/G	G/A	A/A	NA	G/G	A/A
ST4.03ch02pos38648085.1	2	38648085	A/A	A/A	A/A	A/G	A/A	A/A	NA	A/A	A/G	G/G	A/G	G/G	A/G	A/A	NA	A/G	A/G	A/A	A/G	A/A	A/G	A/G	A/G	A/G	A/G	A/A	A/G	A/A	A/G	A/G	A/G	A/G	NA	A/G	A/G	A/G	A/G	A/A	A/G	A/G	A/G	A/A	A/A	A/G	NA	A/A	A/G
ST4.03ch02pos38654150.1	2	38654150	T/T	T/C	T/C	T/C	T/T	T/C	T/C	T/C	T/C	T/T	T/C	T/T	T/C	T/C	T/T	T/C	T/C	T/C	T/T	T/C	T/T	T/T	T/C	T/C	T/T	T/C	T/C	C/C	T/C	T/C	T/T	T/T	T/C	T/T	T/T	T/C	T/T	T/T	T/T	T/C	T/T	T/T	T/C	T/C	T/T	T/T	T/C
ST4.03ch02pos38996039.1	2	38996039	G/A	NA	NA	G/A	G/G	G/G	NA	G/G	G/A	G/A	G/A	G/A	A/A	G/G	G/G	A/A	G/G	NA	G/G	G/A	NA	NA	NA	A/A	G/A	NA	G/A	G/G	G/A	G/A	G/A	NA	NA	G/G	G/G	G/A	G/A	G/G	G/G	A/A	G/A	G/G	G/A	G/A	G/A	G/G	G/A
ST4.03ch02pos38996067.1	2	38996067	C/T	NA	C/T	T/T	C/C	C/T	NA	C/T	T/T	C/T	T/T	C/T	T/T	C/T	C/C	T/T	C/T	C/T	NA	C/T	NA	NA	NA	T/T	T/T	C/T	T/T	T/T	C/T	C/T	C/T	NA	NA	C/T	T/T	C/T	C/T	C/C	C/T	T/T	T/T	C/C	C/T	T/T	C/T	C/C	T/T
ST4.03ch02pos38996096.1	2	38996096	T/C	NA	T/C	C/C	T/T	T/C	NA	T/C	C/C	T/C	C/C	T/C	C/C	T/C	T/T	C/C	T/C	T/C	NA	T/C	NA	NA	NA	C/C	C/C	T/C	C/C	C/C	T/C	T/C	T/C	NA	NA	T/C	C/C	T/C	T/C	T/T	C/C	C/C	C/C	T/T	T/C	C/C	T/C	T/T	C/C
ST4.03ch02pos39025556.1	2	39025556	T/T	T/A	T/A	T/T	T/T	T/T	T/A	T/T	T/T	T/T	T/T	T/T	T/A	T/T	T/T	T/A	T/T	T/A	T/T	T/A	T/T	T/T	T/A	T/A	A/A	T/A	T/A	T/A	T/A	T/A	T/T	T/T	T/A	T/A	T/A	T/A	T/A	T/T	T/A	T/A	A/A	T/T	T/A	T/T	T/T	T/T	T/T
ST4.03ch02pos39025560.1	2	39025560	T/T	T/C	T/C	T/T	T/T	T/T	T/C	T/T	T/T	T/T	T/T	T/T	T/C	T/T	T/T	T/C	T/T	T/C	T/T	T/C	T/T	T/T	T/C	T/C	C/C	T/C	T/C	T/C	T/C	T/C	T/T	T/T	T/C	T/C	T/C	T/C	T/C	T/T	T/C	T/C	C/C	T/T	T/C	T/T	T/T	T/T	T/T
ST4.03ch02pos39047545.1	2	39047545	C/C	C/C	C/C	C/T	C/C	C/C	C/C	C/C	C/T	C/T	C/T	C/T	C/C	C/C	C/C	C/C	C/C	C/C	C/C	C/C	C/T	C/T	C/C	C/C	C/T	C/C	C/C	C/C	C/T	C/T	C/T	C/T	C/T	C/T	C/T	C/T	C/T	C/C	C/C	C/C	C/T	C/C	C/C	C/T	C/T	C/C	C/T
ST4.03ch02pos39131467.1	2	39131467	A/A	NA	A/G	A/G	A/A	A/A	NA	A/A	A/G	G/G	A/G	G/G	G/G	A/A	A/A	G/G	A/G	A/G	A/G	A/G	A/G	G/G	G/G	G/G	G/G	A/G	A/A	A/A	A/G	A/G	A/G	A/G	G/G	A/A	A/A	A/G	A/G	A/A	A/G	A/G	G/G	A/A	A/G	A/G	A/G	A/A	A/G
ST4.03ch02pos39131483.1	2	39131483	C/C	NA	C/T	C/T	C/C	C/C	NA	C/C	C/T	T/T	C/T	T/T	T/T	C/C	C/C	T/T	C/T	C/T	C/T	C/T	C/T	T/T	T/T	T/T	T/T	C/T	C/C	C/C	C/T	C/T	C/T	C/T	T/T	C/C	C/C	C/T	C/T	C/C	C/T	C/T	T/T	C/C	C/T	C/T	C/T	C/C	C/T
ST4.03ch02pos39131506.1	2	39131506	A/A	NA	A/G	A/A	A/A	A/A	A/A	A/A	A/A	A/A	A/A	A/A	A/A	A/A	A/A	A/A	A/A	A/G	A/A	A/A	A/A	A/A	A/A	A/A	G/G	A/G	A/A	A/A	A/A	A/G	A/A	A/A	A/G	A/A	A/A	A/A	A/A	A/A	A/A	A/A	G/G	A/A	A/G	A/A	A/A	A/A	A/A
ST4.03ch02pos39231187.1	2	39231187	C/C	C/C	C/C	C/C	C/C	C/C	C/C	C/C	C/C	C/C	C/C	C/C	C/C	C/C	C/C	C/C	C/C	C/C	C/C	C/C	C/C	C/C	C/C	C/C	C/C	C/C	C/C	C/C	C/C	C/C	C/C	C/C	C/C	C/C	C/C	C/C	C/C	C/C	C/C	C/C	C/C	C/C	C/C	C/C	C/C	C/C	C/C
ST4.03ch02pos39231190.1	2	39231190	G/G	G/T	G/T	G/G	G/G	G/G	G/G	G/G	G/G	G/G	G/G	G/G	G/G	G/G	G/G	G/G	G/G	G/T	G/G	G/G	G/G	G/G	G/G	G/G	G/T	NA	G/G	G/G	G/G	G/T	G/G	G/G	G/G	G/G	G/G	G/G	G/G	G/G	G/G	G/G	G/T	G/G	G/T	G/G	G/G	G/G	G/G
ST4.03ch02pos39268435.1	2	39268435	T/T	T/C	T/C	T/T	T/T	T/T	NA	T/T	T/T	T/T	T/T	T/T	C/C	T/T	T/T	C/C	T/T	T/C	T/T	T/C	T/T	T/T	T/C	C/C	C/C	T/T	T/T	T/T	T/T	T/C	T/T	T/T	C/C	T/T	T/T	T/T	NA	T/T	T/C	T/C	C/C	T/T	T/C	T/T	T/T	T/T	T/T
ST4.03ch02pos39268456.1	2	39268456	C/C	C/A	C/A	C/C	C/C	C/C	NA	C/C	C/C	C/C	C/C	C/C	A/A	C/C	C/C	A/A	C/C	C/A	C/C	C/A	C/C	C/C	C/A	A/A	A/A	C/C	C/C	C/C	C/C	C/A	C/C	C/C	A/A	C/C	C/C	C/C	C/A	C/C	C/A	C/A	A/A	C/C	C/A	C/C	C/C	C/C	C/C
ST4.03ch02pos39389293.1	2	39389293	A/A	A/A	A/A	A/A	A/A	A/A	A/A	A/A	A/A	A/G	A/A	A/G	A/A	A/A	A/A	A/A	A/G	A/A	A/G	A/A	NA	A/G	A/A	A/A	A/G	A/A	A/A	A/A	A/A	A/A	A/A	A/A	A/A	A/A	A/A	A/A	A/A	A/A	A/A	A/A	A/G	A/A	A/A	A/A	A/G	A/A	A/A
ST4.03ch02pos39408379.1	2	39408379	G/G	G/G	G/G	G/G	G/G	G/G	G/G	G/G	G/G	G/T	G/G	G/T	G/G	G/G	G/G	G/G	G/T	G/G	G/T	G/G	G/G	G/T	G/G	G/G	G/T	G/G	G/G	G/G	G/G	G/G	G/G	G/G	G/G	G/G	G/G	G/G	G/G	G/G	G/G	G/G	G/T	G/G	G/G	G/G	G/T	G/G	G/G
ST4.03ch02pos39434358.1	2	39434358	C/T	C/T	C/T	C/C	T/T	C/T	C/T	C/T	C/C	C/T	C/C	C/T	T/T	C/T	T/T	T/T	C/T	C/T	T/T	T/T	C/T	C/T	T/T	T/T	C/C	C/T	C/C	C/C	C/T	C/T	C/T	C/T	C/T	C/C	C/C	C/T	C/T	T/T	C/T	C/C	C/C	T/T	C/T	C/C	C/T	T/T	C/C
ST4.03ch02pos39484288.1	2	39484288	A/G	A/G	A/G	A/A	G/G	A/G	NA	A/G	A/A	A/G	A/A	A/G	A/G	A/G	G/G	A/G	A/G	A/G	G/G	A/G	A/G	A/G	A/G	A/G	A/G	A/G	A/A	A/A	A/A	A/G	A/G	A/G	A/A	A/G	A/A	A/G	A/G	G/G	A/G	A/A	A/G	G/G	A/G	A/A	A/G	G/G	A/A
ST4.03ch02pos39484304.1	2	39484304	G/A	G/A	G/A	G/G	A/A	G/A	NA	G/A	G/G	G/A	G/G	G/A	G/A	G/A	A/A	G/A	G/A	G/A	A/A	G/A	G/A	G/A	G/A	G/A	G/A	G/A	G/G	G/G	G/G	G/A	G/A	G/A	G/G	G/A	G/G	G/A	G/A	A/A	G/A	G/G	G/A	A/A	G/A	G/G	G/A	A/A	G/G
ST4.03ch02pos39485154.1	2	39485154	A/G	NA	A/A	A/G	A/A	A/A	A/A	A/A	A/G	A/G	A/G	A/G	A/A	A/A	A/A	A/A	A/A	A/A	A/A	A/G	NA	A/G	A/A	A/A	A/A	A/A	A/G	A/A	NA	A/G	A/G	A/G	A/A	A/A	A/A	A/G	A/G	A/A	A/G	A/A	A/A	A/A	A/A	A/G	A/G	A/A	A/G
ST4.03ch02pos39485196.1	2	39485196	G/G	A/G	A/G	A/G	G/G	A/G	G/G	A/G	A/G	G/G	A/G	G/G	A/G	A/G	G/G	A/G	A/G	A/G	G/G	G/G	G/G	G/G	A/G	A/G	G/G	NA	A/G	A/A	A/G	NA	G/G	G/G	A/G	G/G	A/G	A/G	G/G	G/G	G/G	A/A	G/G	G/G	NA	A/G	G/G	G/G	A/G
ST4.03ch02pos39485206.1	2	39485206	G/A	NA	G/A	G/G	A/A	G/A	A/A	G/A	G/G	G/A	G/G	G/A	G/A	G/A	A/A	G/A	G/A	G/A	A/A	G/A	NA	G/A	G/A	G/A	G/A	NA	G/G	G/G	NA	G/A	G/A	G/A	G/G	G/A	G/G	G/A	G/A	A/A	G/A	G/G	G/A	A/A	NA	G/G	G/A	A/A	G/G
ST4.03ch02pos39652158.1	2	39652158	T/A	T/A	A/A	A/A	T/T	T/A	T/A	T/A	A/A	A/A	A/A	A/A	A/A	T/A	T/T	A/A	A/A	A/A	T/A	A/A	T/A	A/A	NA	A/A	A/A	T/A	A/A	A/A	T/A	T/A	T/A	T/A	A/A	T/A	A/A	T/A	T/A	T/T	A/A	A/A	A/A	T/T	A/A	A/A	T/A	T/T	A/A
ST4.03ch02pos39652174.1	2	39652174	T/A	T/A	T/A	A/A	T/T	T/A	T/T	T/A	A/A	A/A	A/A	A/A	T/T	T/A	T/T	T/T	A/A	T/A	T/A	T/A	T/A	A/A	T/T	T/T	T/A	T/A	T/A	A/A	T/A	T/A	T/A	T/A	T/A	T/A	A/A	T/A	T/A	T/T	A/A	T/A	T/A	T/T	T/A	A/A	T/A	T/T	A/A
ST4.03ch02pos39652204.1	2	39652204	T/A	T/A	T/A	A/A	T/T	T/A	T/T	T/A	A/A	A/A	A/A	A/A	T/T	T/A	T/T	T/T	A/A	T/A	T/A	T/A	T/A	A/A	T/T	T/T	T/A	T/A	T/A	A/A	T/A	T/A	T/A	T/A	T/A	T/A	A/A	T/A	T/A	T/T	A/A	T/A	T/A	T/T	T/A	A/A	T/A	T/T	A/A
ST4.03ch02pos39737867.1	2	39737867	NA	A/A	A/A	T/A	T/T	T/A	T/T	T/A	NA	T/A	NA	NA	A/A	T/A	T/T	NA	A/A	A/A	T/A	NA	NA	NA	NA	A/A	A/A	NA	A/A	A/A	T/A	T/A	T/T	NA	NA	NA	A/A	T/A	T/A	T/T	A/A	A/A	A/A	NA	A/A	T/A	T/A	T/T	T/A
ST4.03ch02pos39759576.1	2	39759576	A/A	NA	A/C	A/C	A/A	A/C	A/A	A/C	A/C	A/C	A/C	A/C	A/A	A/C	A/A	A/A	C/C	A/C	A/C	A/A	A/A	A/C	A/A	A/A	C/C	A/C	A/C	C/C	A/C	A/C	A/A	A/A	A/C	A/C	C/C	A/C	NA	A/A	C/C	A/C	C/C	A/A	A/C	A/C	A/C	A/A	A/C
ST4.03ch02pos39759591.1	2	39759591	T/T	NA	G/G	T/G	T/T	T/G	T/G	T/G	T/G	T/G	T/G	T/G	G/G	T/G	T/T	G/G	G/G	G/G	T/G	T/G	T/T	T/G	NA	G/G	G/G	T/G	G/G	G/G	T/G	T/G	T/T	T/T	NA	T/G	G/G	T/G	NA	T/T	G/G	G/G	G/G	T/T	G/G	T/G	T/G	T/T	T/G
ST4.03ch02pos39895147.1	2	39895147	A/A	A/T	A/T	A/T	A/A	A/T	A/T	A/T	A/T	A/T	A/T	A/T	T/T	A/T	A/A	T/T	T/T	A/T	A/T	A/T	A/A	A/T	T/T	T/T	T/T	A/T	T/T	T/T	A/T	A/T	A/A	A/A	NA	A/T	T/T	A/T	A/T	A/A	T/T	T/T	T/T	A/A	A/T	A/T	A/T	A/A	A/T
ST4.03ch02pos39944358.1	2	39944358	T/T	T/T	T/T	T/T	T/T	T/T	T/T	T/T	T/T	T/T	T/T	T/T	T/C	T/T	T/T	NA	T/T	T/T	T/T	T/T	T/T	T/T	NA	NA	NA	T/T	T/T	T/T	T/T	T/T	T/T	T/T	T/T	T/T	T/T	T/T	T/T	T/T	NA	T/T	T/C	T/T	T/T	T/T	T/T	T/T	T/T
ST4.03ch02pos39944366.1	2	39944366	A/A	A/A	A/A	A/A	A/A	A/A	A/A	A/A	A/A	A/A	A/A	A/A	A/T	A/A	A/A	NA	A/A	A/A	A/A	A/A	A/A	A/A	NA	NA	NA	A/A	A/A	A/A	A/A	A/A	A/A	A/A	A/A	A/A	A/A	A/A	A/A	A/A	A/T	A/A	A/T	A/A	A/A	A/A	A/A	A/A	A/A
ST4.03ch02pos39944400.1	2	39944400	G/G	G/G	G/G	G/G	G/G	G/G	G/G	G/G	G/G	G/G	G/G	G/G	G/A	G/G	G/G	G/A	G/G	G/G	G/G	G/A	G/G	G/G	G/A	G/A	G/A	G/G	G/G	G/G	G/G	G/G	G/G	G/G	G/G	G/G	G/G	NA	G/G	G/G	G/A	G/G	G/A	G/G	G/G	G/G	G/G	G/G	G/G
ST4.03ch02pos40090778.1	2	40090778	T/T	T/T	T/T	T/T	T/T	T/T	T/C	T/T	T/T	T/T	T/T	T/T	T/C	T/T	T/T	T/C	T/T	T/T	T/T	T/C	T/T	T/T	T/C	T/C	T/C	T/T	T/T	T/T	T/T	T/C	T/T	T/T	T/T	T/T	T/T	T/T	T/T	T/T	T/C	T/T	T/C	T/T	T/T	T/T	T/T	T/T	T/T
ST4.03ch02pos40090781.1	2	40090781	A/A	A/A	A/A	A/A	A/A	A/A	A/T	A/A	A/A	A/A	A/A	A/A	A/T	A/A	A/A	A/T	A/A	A/A	A/A	A/T	A/A	A/A	A/T	A/T	A/T	A/A	A/A	A/A	A/A	A/T	A/A	A/A	A/A	A/A	A/A	A/A	A/A	A/A	A/T	A/A	A/T	A/A	A/A	A/A	A/A	A/A	A/A
ST4.03ch02pos40090799.1	2	40090799	G/G	G/G	G/G	G/G	G/G	G/G	G/G	G/G	G/G	G/G	G/G	G/G	G/G	G/G	G/G	G/G	G/G	G/G	G/G	G/G	G/G	G/G	G/G	G/G	G/G	G/G	G/G	G/G	G/G	G/G	G/G	G/G	G/G	G/G	G/G	G/G	G/G	G/G	G/G	G/G	G/G	G/G	G/G	G/G	G/G	G/G	G/G
ST4.03ch02pos40117395.1	2	40117395	A/A	A/G	A/A	A/A	A/A	A/A	A/A	A/A	A/A	A/A	A/A	A/A	A/A	A/A	A/A	A/A	A/A	A/A	A/A	A/A	A/A	A/A	A/A	A/A	A/G	A/G	A/A	A/A	A/A	A/G	A/A	A/A	A/G	A/G	A/G	A/A	NA	A/A	A/A	A/A	A/G	A/A	A/A	A/A	A/A	A/A	A/A
ST4.03ch02pos40117412.1	2	40117412	G/A	G/A	A/A	A/A	A/A	A/A	G/A	A/A	A/A	A/A	A/A	A/A	G/A	A/A	A/A	G/A	A/A	A/A	A/A	G/A	A/A	A/A	G/A	G/A	G/G	G/A	G/A	A/A	G/A	G/A	A/A	A/A	G/A	G/A	G/A	NA	G/A	A/A	G/A	A/A	G/G	A/A	A/A	A/A	A/A	A/A	A/A
ST4.03ch02pos40175748.1	2	40175748	T/A	T/A	A/A	A/A	A/A	A/A	T/A	A/A	A/A	A/A	A/A	A/A	T/A	A/A	A/A	T/A	A/A	A/A	A/A	T/A	A/A	A/A	T/A	T/A	T/T	T/A	T/A	A/A	T/A	T/A	A/A	A/A	T/A	T/A	T/A	T/A	A/A	A/A	T/A	A/A	T/T	A/A	A/A	A/A	A/A	A/A	A/A
ST4.03ch02pos40175803.1	2	40175803	T/T	T/T	T/T	T/T	T/T	T/T	NA	T/T	T/T	T/T	T/T	T/T	T/A	T/T	T/T	T/A	T/T	T/T	T/T	T/A	T/T	T/T	T/A	T/A	T/A	T/T	T/T	T/T	T/T	T/A	T/T	T/T	T/T	T/T	T/T	T/T	T/T	T/T	T/A	T/T	T/A	T/T	T/T	T/T	T/T	T/T	T/T
ST4.03ch02pos40176050.1	2	40176050	G/A	NA	A/A	A/A	A/A	A/A	NA	A/A	A/A	A/A	A/A	A/A	G/A	A/A	A/A	G/A	A/A	A/A	A/A	G/A	A/A	A/A	NA	G/A	G/A	G/A	G/A	A/A	A/A	G/A	A/A	A/A	G/A	A/A	A/A	A/A	A/A	A/A	G/A	A/A	G/A	A/A	A/A	A/A	A/A	A/A	A/A
ST4.03ch02pos40176075.1	2	40176075	G/G	NA	G/G	G/G	G/G	G/G	NA	G/G	G/G	G/G	G/G	G/G	G/A	G/G	G/G	G/A	G/G	G/G	G/G	G/A	G/G	G/G	NA	G/A	G/A	G/G	G/G	G/G	G/G	NA	G/G	G/G	G/G	G/G	G/G	G/G	G/G	G/G	G/A	G/G	G/A	G/G	G/G	G/G	G/G	G/G	G/G
ST4.03ch02pos40302785.1	2	40302785	A/C	A/C	A/A	A/C	A/A	A/A	A/A	A/A	A/C	A/C	A/C	A/C	A/A	A/A	A/A	A/A	A/A	A/A	A/A	A/C	A/C	A/C	A/A	A/A	A/C	A/C	A/C	A/A	A/C	A/C	A/C	A/C	A/A	A/A	A/A	A/C	A/C	A/A	A/A	A/A	A/C	A/A	A/A	A/C	A/C	A/A	A/C
ST4.03ch02pos40302786.1	2	40302786	G/T	G/T	G/G	G/T	G/G	G/G	G/G	G/G	G/T	G/T	G/T	G/T	G/G	G/G	G/G	G/G	G/G	G/G	G/G	G/T	G/T	G/T	G/G	G/G	G/T	G/T	G/T	G/G	G/T	G/T	G/T	G/T	G/G	G/G	G/G	G/T	G/T	G/G	G/G	G/G	G/T	G/G	G/G	G/T	G/T	G/G	G/T
ST4.03ch02pos40302789.1	2	40302789	C/A	C/A	C/C	C/A	C/C	C/C	C/C	C/C	C/A	C/A	C/A	C/A	C/C	C/C	C/C	C/C	C/C	C/C	C/C	C/A	C/A	C/A	C/C	C/C	C/A	C/A	C/A	C/C	C/A	C/A	C/A	C/A	C/C	C/C	C/C	C/A	C/A	C/C	C/C	C/C	C/A	C/C	C/C	C/A	C/A	C/C	C/A
ST4.03ch02pos40302797.1	2	40302797	A/A	A/A	NA	A/A	NA	C/C	A/A	C/C	A/A	A/A	A/A	A/A	C/C	C/C	C/C	C/C	C/C	C/C	C/C	A/A	A/A	A/A	C/C	C/C	A/A	A/A	A/A	C/C	A/A	A/A	A/A	A/A	C/C	C/C	C/C	A/A	A/A	C/C	C/C	C/C	A/A	C/C	C/C	A/A	A/A	C/C	A/A
ST4.03ch02pos40385279.1	2	40385279	A/C	A/C	A/C	A/A	A/C	A/C	A/C	C/C	A/A	A/C	A/A	A/C	A/C	A/C	A/C	A/C	A/C	A/C	C/C	A/C	A/C	A/C	A/C	A/C	A/C	A/C	A/A	A/A	A/C	A/C	A/C	A/C	A/C	A/C	A/A	A/C	A/C	C/C	A/A	A/A	A/C	C/C	A/C	A/A	A/C	A/C	A/A
ST4.03ch02pos40385287.1	2	40385287	T/A	T/A	T/T	T/A	T/T	T/T	T/A	T/T	T/A	T/A	T/A	T/A	T/T	T/T	T/T	T/T	T/T	T/T	T/T	T/A	T/A	T/A	T/T	T/T	T/A	T/A	T/A	T/T	T/A	T/A	T/A	T/A	T/T	T/T	T/T	T/A	T/A	T/T	T/T	T/T	T/A	T/T	T/T	T/A	T/A	T/T	T/A
ST4.03ch02pos40385295.1	2	40385295	G/G	G/G	T/G	T/G	T/G	T/G	T/G	G/G	T/G	G/G	T/G	G/G	T/G	T/G	T/G	T/G	T/G	T/G	G/G	G/G	G/G	G/G	T/G	T/G	G/G	T/G	T/G	T/T	T/G	T/G	G/G	G/G	T/G	T/G	T/T	T/G	G/G	G/G	T/G	T/T	G/G	G/G	T/G	T/G	NA	T/G	T/G
ST4.03ch02pos40389340.1	2	40389340	C/C	C/C	T/C	T/C	T/C	T/C	T/C	C/C	T/C	C/C	T/C	C/C	T/C	T/C	T/C	T/C	T/C	T/C	C/C	C/C	C/C	C/C	T/C	T/C	C/C	T/C	T/C	T/T	T/C	T/C	C/C	C/C	T/C	T/C	T/T	T/C	C/C	C/C	T/C	T/T	C/C	C/C	T/C	T/C	C/C	T/C	T/C
ST4.03ch02pos40389341.1	2	40389341	T/A	T/A	T/A	T/T	T/A	T/A	T/A	A/A	T/T	T/A	T/T	T/A	T/A	T/A	T/A	T/A	T/A	T/A	A/A	T/A	T/A	T/A	T/A	T/A	T/A	T/A	T/T	T/T	T/A	T/A	T/A	T/A	T/A	T/A	T/T	T/A	T/A	A/A	T/T	T/T	T/A	A/A	T/A	T/T	T/A	T/A	T/T
ST4.03ch02pos40389391.1	2	40389391	A/G	A/G	A/G	A/A	A/G	A/G	A/G	G/G	A/A	A/G	A/A	A/G	A/G	A/G	A/G	A/G	A/G	A/G	G/G	A/G	A/G	A/G	A/G	A/G	A/G	A/G	A/A	A/A	A/G	A/G	A/G	A/G	A/G	A/G	A/A	A/G	A/G	G/G	A/A	A/A	A/G	G/G	A/G	A/A	A/G	A/G	A/A
ST4.03ch02pos40389392.1	2	40389392	G/C	G/C	G/C	G/G	G/C	G/C	G/C	C/C	G/G	G/C	G/G	G/C	G/C	G/C	G/C	G/C	G/C	G/C	C/C	G/C	G/C	G/C	G/C	G/C	G/C	G/C	G/G	G/G	G/C	G/C	G/C	G/C	G/C	G/C	G/G	G/C	G/C	C/C	G/G	G/G	G/C	C/C	G/C	G/G	G/C	G/C	G/G
ST4.03ch02pos40508742.1	2	40508742	G/G	NA	G/A	G/A	G/G	G/A	G/G	G/G	G/A	G/G	G/A	G/G	G/G	G/A	G/G	G/G	G/A	G/A	G/G	G/G	G/G	G/G	G/G	G/G	G/G	G/A	G/A	A/A	G/A	G/G	G/G	G/G	G/A	G/G	G/A	G/A	G/G	G/G	G/A	G/A	G/G	G/G	G/A	G/A	G/G	G/G	G/A
ST4.03ch02pos40508796.1	2	40508796	C/C	NA	C/T	C/T	C/C	C/T	C/C	C/C	C/T	C/C	C/T	C/C	C/C	C/T	C/C	C/C	C/T	C/T	C/C	C/C	C/C	C/C	C/C	C/C	C/C	C/T	C/T	T/T	C/T	C/T	C/C	C/C	C/T	C/C	C/T	C/T	C/T	C/C	C/T	C/T	C/C	C/C	C/T	C/T	C/C	C/C	C/T
ST4.03ch02pos40547953.1	2	40547953	A/A	NA	A/G	A/G	A/A	A/G	A/A	A/A	A/G	A/A	A/G	A/A	A/A	A/G	A/A	A/A	A/G	A/G	A/A	A/A	A/A	A/A	A/A	A/A	A/G	A/G	A/G	G/G	A/G	A/G	A/A	A/A	G/G	A/G	G/G	A/G	A/G	A/A	A/G	A/G	A/G	A/A	A/G	A/G	A/A	A/A	A/G
ST4.03ch02pos40548058.1	2	40548058	G/G	NA	G/A	G/A	G/G	G/A	G/G	G/G	G/A	G/G	G/A	G/G	G/G	G/A	G/G	G/G	G/A	G/A	G/G	G/G	G/G	G/G	G/G	G/G	G/G	G/A	G/A	A/A	G/A	G/A	G/G	NA	G/A	G/G	G/A	G/A	G/G	G/G	G/A	G/A	G/G	G/G	G/A	G/A	G/G	G/G	G/A
ST4.03ch02pos40939318.1	2	40939318	G/G	G/G	G/G	G/C	G/G	G/G	G/G	G/G	G/C	G/C	G/C	G/C	G/G	G/G	G/G	G/G	G/G	G/G	G/G	G/C	G/G	G/C	G/G	G/G	G/G	G/G	G/G	G/G	G/G	G/G	G/C	G/G	G/C	G/G	G/G	G/G	G/G	G/G	G/C	G/G	G/G	G/G	G/G	G/C	G/C	G/G	G/C
ST4.03ch02pos40939321.1	2	40939321	A/A	NA	G/A	G/A	A/A	G/A	NA	A/A	G/A	A/A	G/A	A/A	G/A	G/A	A/A	G/A	G/A	G/A	A/A	G/A	A/A	A/A	G/A	G/A	G/A	G/A	G/A	G/G	G/A	G/A	A/A	A/A	G/A	A/A	G/A	G/A	A/A	A/A	G/A	G/A	G/A	A/A	G/A	G/A	A/A	A/A	G/A
ST4.03ch02pos40939326.1	2	40939326	G/G	NA	A/G	A/A	G/G	A/G	NA	G/G	A/A	A/G	A/A	A/G	A/G	A/G	G/G	A/G	A/G	A/G	G/G	A/A	G/G	A/G	A/G	A/G	A/G	A/G	A/G	A/A	A/G	A/G	A/G	G/G	A/G	G/G	A/G	A/G	G/G	G/G	A/A	A/G	A/G	G/G	A/G	A/A	A/G	G/G	A/A
ST4.03ch02pos40939344.1	2	40939344	C/C	NA	T/C	T/T	C/C	T/C	NA	C/C	T/T	T/C	T/T	T/C	T/C	T/C	C/C	T/C	T/C	T/C	C/C	T/T	C/C	T/C	T/C	T/C	T/C	T/C	T/C	T/T	T/C	T/C	T/C	C/C	T/C	C/C	T/C	T/C	C/C	C/C	T/T	T/C	T/C	C/C	T/C	T/T	T/C	C/C	T/T
ST4.03ch02pos40939379.1	2	40939379	T/T	NA	T/G	T/G	T/T	T/G	T/T	T/T	T/G	T/T	T/G	T/T	T/T	T/G	T/T	T/T	T/G	T/G	T/T	T/T	T/T	T/T	T/T	T/T	T/T	T/G	T/G	G/G	T/G	NA	T/T	T/T	T/G	T/T	T/G	T/G	T/T	T/T	T/G	T/G	T/T	T/T	T/G	T/G	T/T	T/T	T/G
ST4.03ch02pos40953068.1	2	40953068	C/C	C/C	C/C	C/T	C/C	C/C	C/C	C/C	C/T	C/T	C/T	C/T	C/C	C/C	C/C	C/C	C/C	C/C	C/C	C/T	C/C	C/T	C/C	C/C	C/C	C/C	C/C	C/C	C/C	C/C	C/T	C/C	C/T	C/C	C/C	C/C	C/C	C/C	C/C	C/C	C/C	C/C	C/C	C/T	C/T	C/C	C/T
ST4.03ch02pos40953080.1	2	40953080	A/A	A/A	A/A	A/G	A/A	A/A	A/A	A/A	A/G	A/G	A/G	A/G	A/A	A/A	A/A	A/A	A/A	A/A	A/A	A/G	A/A	A/G	A/A	A/A	A/A	A/A	A/A	A/A	A/A	A/A	A/G	A/A	A/G	A/A	A/A	A/A	A/A	A/A	A/A	A/A	A/A	A/A	A/A	A/G	A/G	A/A	A/G
ST4.03ch02pos40965664.1	2	40965664	G/G	NA	G/A	G/A	G/G	NA	G/G	G/G	G/A	G/G	G/A	G/G	G/G	G/A	G/G	G/G	G/A	G/A	G/G	G/G	G/G	G/G	G/G	G/G	G/G	NA	G/A	NA	G/A	G/G	G/G	NA	NA	G/G	G/A	G/A	G/G	G/G	G/A	NA	G/G	G/G	G/A	G/A	G/G	G/G	G/A
ST4.03ch02pos40965692.1	2	40965692	A/A	NA	G/A	G/G	A/A	NA	NA	A/A	G/G	G/A	G/G	NA	G/A	G/A	A/A	G/A	G/A	G/A	A/A	G/G	A/A	NA	NA	G/A	G/A	NA	G/A	NA	G/A	NA	G/A	NA	NA	A/A	G/A	G/A	A/A	A/A	G/A	NA	G/A	A/A	G/A	G/G	G/A	A/A	G/G
ST4.03ch02pos40965740.1	2	40965740	C/C	NA	C/G	C/G	C/C	NA	C/C	C/C	C/G	C/C	NA	C/C	C/C	C/G	C/C	C/C	C/G	C/G	C/C	C/C	C/C	C/C	C/C	C/C	C/C	NA	C/G	NA	C/G	C/C	C/C	NA	NA	C/C	C/G	C/G	C/C	C/C	C/G	NA	C/C	C/C	C/G	C/G	C/C	C/C	C/G
ST4.03ch02pos41045262.1	2	41045262	A/A	T/A	NA	T/T	A/A	A/A	T/A	A/A	T/T	T/A	T/T	T/A	T/T	NA	A/A	T/T	A/A	A/A	A/A	T/T	A/A	T/A	NA	T/T	T/A	T/A	NA	NA	T/A	T/A	T/A	A/A	T/A	A/A	NA	T/A	T/A	A/A	NA	T/T	T/A	A/A	A/A	T/T	T/A	A/A	T/T
ST4.03ch02pos41061785.1	2	41061785	G/G	G/G	G/G	G/A	G/G	G/G	G/G	G/G	G/A	G/A	G/A	G/A	G/G	G/G	G/G	G/G	G/G	G/G	G/G	G/A	G/G	G/A	G/G	G/G	G/G	G/G	G/G	G/G	G/G	G/G	G/A	G/G	G/G	G/G	G/G	G/G	G/G	G/G	G/G	G/G	G/G	G/G	G/G	G/A	G/A	G/G	G/A
ST4.03ch02pos41061806.1	2	41061806	T/T	T/T	T/T	T/A	T/T	T/T	T/T	T/T	T/A	T/A	T/A	T/A	T/T	T/T	T/T	T/T	T/T	T/T	T/T	T/A	T/T	T/A	T/T	T/T	T/T	T/T	T/T	T/T	T/T	T/T	T/A	T/T	T/T	T/T	T/T	T/T	T/T	T/T	T/T	T/T	T/T	T/T	T/T	T/A	T/A	T/T	T/A
ST4.03ch02pos41388957.1	2	41388957	A/T	A/T	A/T	A/T	A/A	A/T	A/A	A/T	A/T	A/T	A/T	A/T	A/A	A/T	A/A	A/A	T/T	A/T	A/T	A/A	A/A	A/T	A/A	A/A	A/A	A/T	A/T	T/T	A/T	A/T	A/A	A/A	A/T	A/T	A/T	A/T	A/A	A/A	A/T	A/T	A/A	A/A	A/T	A/T	A/T	A/A	A/T
ST4.03ch02pos41388959.1	2	41388959	T/T	T/T	T/T	T/C	T/C	T/T	T/C	T/T	T/C	T/C	T/C	T/C	T/T	T/T	T/C	T/T	T/T	T/T	T/T	T/C	T/T	T/C	T/T	T/T	T/T	T/T	T/T	T/T	T/T	T/T	T/C	T/T	T/C	T/T	T/T	T/T	T/T	T/T	T/T	T/T	T/T	T/T	T/T	T/C	T/C	T/C	T/C
ST4.03ch02pos41422961.1	2	41422961	T/T	T/G	T/T	T/T	T/T	T/T	T/G	T/T	T/T	T/T	T/T	T/T	T/G	T/T	T/T	T/G	T/T	T/T	T/T	T/G	T/T	T/T	T/G	T/G	T/T	T/G	T/T	T/T	T/T	T/G	T/T	T/T	T/T	T/T	T/T	T/T	T/T	T/T	T/T	T/T	T/T	T/T	T/T	T/T	T/T	T/T	T/T
ST4.03ch02pos41422967.1	2	41422967	C/C	T/C	T/C	T/C	T/C	C/C	T/C	C/C	T/C	T/C	T/C	T/C	T/C	C/C	T/C	T/C	C/C	T/C	C/C	T/T	C/C	T/C	T/C	T/C	T/C	T/C	C/C	C/C	C/C	T/C	T/C	C/C	T/C	C/C	C/C	C/C	T/C	C/C	T/C	C/C	T/C	C/C	T/C	T/C	T/C	T/C	T/C
ST4.03ch02pos41423005.1	2	41423005	C/C	C/C	C/C	C/T	C/T	C/C	C/T	C/C	C/T	C/T	C/T	C/T	C/C	C/C	C/T	C/C	C/C	C/C	C/C	C/T	C/C	C/T	C/C	C/C	C/C	C/C	C/C	C/C	C/C	C/C	C/T	C/C	C/T	C/C	C/C	C/C	C/C	C/C	C/C	C/C	C/C	C/C	C/C	C/T	C/T	C/T	C/T
ST4.03ch02pos41423006.1	2	41423006	G/G	G/G	G/A	G/G	G/G	G/G	G/G	G/G	G/G	G/G	G/G	G/G	G/G	G/G	G/G	G/G	G/G	G/A	G/G	G/G	G/G	G/G	G/G	G/G	G/A	G/G	G/G	G/G	G/G	NA	G/G	G/G	G/A	G/G	G/G	G/G	NA	G/G	G/G	G/G	G/A	G/G	G/A	G/G	G/G	G/G	G/G
ST4.03ch02pos41423015.1	2	41423015	C/C	C/T	C/C	C/C	C/C	C/C	C/T	C/C	C/C	C/C	C/C	C/C	C/T	C/C	C/C	C/T	C/C	C/C	C/C	C/T	C/C	C/C	C/T	C/T	C/C	C/T	C/C	C/C	C/C	C/T	C/C	C/C	C/C	C/C	C/C	C/C	C/C	C/C	C/C	C/C	C/C	C/C	C/C	C/C	C/C	C/C	C/C
ST4.03ch02pos41423016.1	2	41423016	C/C	G/C	C/C	G/C	G/C	C/C	G/C	C/C	G/C	G/C	G/C	G/C	G/C	C/C	G/C	G/C	C/C	C/C	C/C	G/G	C/C	G/C	G/C	G/C	G/C	G/C	C/C	C/C	C/C	G/C	G/C	C/C	G/C	C/C	C/C	C/C	C/C	C/C	G/C	C/C	G/C	C/C	C/C	G/C	G/C	G/C	G/C
ST4.03ch02pos41433161.1	2	41433161	T/T	T/T	T/A	T/T	T/T	T/T	T/T	T/T	T/T	T/T	T/T	T/T	T/T	T/T	T/T	T/T	T/T	T/A	T/T	T/T	T/T	T/T	T/T	T/T	T/A	T/T	T/T	T/T	T/T	T/A	T/T	T/T	T/A	T/T	T/T	T/T	T/T	T/T	T/T	T/T	T/A	T/T	T/A	T/T	T/T	T/T	T/T
ST4.03ch02pos41433201.1	2	41433201	T/T	T/T	T/T	T/T	T/T	T/T	T/T	T/T	T/T	T/T	T/T	T/T	T/T	T/T	T/T	T/T	T/T	T/T	T/T	T/T	T/T	T/T	T/T	T/T	T/T	T/T	T/T	T/T	T/T	T/T	T/T	T/T	T/T	T/T	T/T	T/T	T/T	T/T	T/T	T/T	T/T	T/T	T/T	T/T	T/T	T/T	T/T
ST4.03ch02pos41470875.1	2	41470875	C/C	C/C	C/C	C/T	NA	C/C	C/T	C/C	C/T	C/T	C/T	C/T	C/C	C/C	C/T	C/C	C/C	C/C	C/C	C/T	C/C	C/T	C/C	C/C	C/C	C/C	C/C	C/C	C/C	C/C	C/T	C/C	NA	C/C	C/C	C/C	C/C	C/C	NA	C/C	C/C	C/C	C/C	C/T	C/T	C/T	C/T
ST4.03ch02pos41470884.1	2	41470884	T/T	T/T	T/C	T/T	T/T	T/T	T/T	T/T	T/T	T/T	T/T	T/T	T/T	T/T	T/T	T/T	T/T	T/C	T/T	T/T	T/T	T/T	T/T	T/T	T/C	T/T	T/T	T/T	NA	T/T	T/T	T/T	T/C	T/T	T/T	T/T	T/T	T/T	T/C	T/T	T/C	T/T	T/C	T/T	T/T	T/T	T/T
ST4.03ch02pos41489365.1	2	41489365	A/A	A/A	A/A	A/A	A/A	A/A	A/A	A/A	A/A	A/A	A/A	A/A	C/A	A/A	A/A	C/A	A/A	A/A	A/A	C/A	A/A	A/A	C/A	C/A	A/A	A/A	A/A	A/A	A/A	NA	A/A	A/A	A/A	A/A	A/A	A/A	A/A	A/A	A/A	C/A	A/A	A/A	A/A	A/A	A/A	A/A	A/A
ST4.03ch02pos41489431.1	2	41489431	T/T	T/T	T/T	T/T	T/T	T/T	T/T	T/T	T/T	T/T	T/T	T/T	A/T	T/T	T/T	A/T	T/T	T/T	T/T	A/T	T/T	T/T	A/T	A/T	T/T	T/T	T/T	T/T	T/T	A/T	T/T	T/T	T/T	T/T	T/T	T/T	T/T	T/T	T/T	A/T	T/T	T/T	T/T	T/T	T/T	T/T	T/T
ST4.03ch02pos41489458.1	2	41489458	A/A	A/A	A/A	A/T	A/A	A/A	A/T	A/A	A/T	A/T	A/T	A/T	A/A	A/A	A/T	A/A	A/A	A/A	A/A	A/T	A/A	A/T	A/A	A/A	A/A	A/A	A/A	A/A	A/A	A/A	A/T	A/A	A/T	A/A	A/A	A/A	A/A	A/A	A/A	A/A	A/A	A/A	A/A	A/T	A/T	A/T	A/T
ST4.03ch02pos41489459.1	2	41489459	T/C	T/C	T/C	T/C	T/C	T/C	T/C	T/C	T/C	T/C	T/C	T/C	T/C	T/C	T/C	T/C	T/C	T/C	T/C	T/T	T/C	T/C	T/C	T/C	T/C	T/C	T/C	T/C	T/C	T/C	T/C	T/C	T/C	T/C	T/C	T/C	T/C	T/C	T/C	T/C	T/C	T/C	T/C	T/C	T/C	T/C	T/C
ST4.03ch02pos41489529.1	2	41489529	C/C	T/C	C/C	C/C	C/C	C/C	C/C	C/C	C/C	C/C	C/C	C/C	T/C	C/C	C/C	T/C	C/C	C/C	C/C	T/C	C/C	C/C	T/C	T/C	T/C	C/C	C/C	C/C	C/C	T/C	C/C	C/C	C/C	C/C	C/C	C/C	C/C	C/C	T/C	T/C	T/C	C/C	C/C	C/C	C/C	C/C	C/C
ST4.03ch02pos41512218.1	2	41512218	A/A	NA	A/A	A/A	A/A	A/A	A/G	A/A	A/A	NA	A/A	A/A	A/G	A/A	A/A	A/G	A/A	A/A	A/A	NA	A/A	NA	NA	A/G	A/A	NA	A/A	A/A	NA	A/A	A/A	A/A	NA	A/A	A/A	NA	A/A	A/A	A/A	A/A	A/A	A/A	A/A	A/A	A/A	A/A	A/A
ST4.03ch02pos41566923.1	2	41566923	G/G	G/G	G/G	G/G	G/G	G/G	G/G	G/G	G/G	G/G	G/G	G/G	G/A	G/G	G/G	G/A	NA	G/G	G/G	G/G	G/G	G/G	G/A	G/A	G/G	G/G	G/G	NA	G/G	G/A	G/G	G/G	G/G	NA	G/A	G/G	G/G	G/G	NA	A/A	G/G	G/G	G/G	G/G	G/G	G/G	G/G
ST4.03ch02pos41566942.1	2	41566942	G/G	G/G	G/G	A/A	G/G	G/G	G/A	G/G	A/A	A/A	A/A	A/A	G/A	G/G	G/A	G/A	NA	G/G	G/G	G/A	G/G	G/A	G/A	G/A	G/G	G/G	G/G	NA	G/G	G/A	G/A	G/G	G/A	NA	G/A	G/G	G/G	G/G	NA	A/A	G/G	G/G	G/G	A/A	G/A	G/A	A/A
ST4.03ch02pos41655057.1	2	41655057	T/T	T/T	T/T	NA	T/C	T/T	T/C	T/T	T/C	T/C	NA	T/C	T/T	T/T	NA	T/T	T/T	T/T	T/T	T/C	T/T	NA	NA	T/T	T/T	T/T	NA	T/T	T/T	T/T	T/C	T/T	NA	T/T	T/T	T/T	T/T	T/T	T/T	T/T	T/T	T/T	T/T	T/C	T/C	T/C	T/C
ST4.03ch02pos41655064.1	2	41655064	T/T	T/T	T/T	NA	T/C	T/T	T/C	T/T	T/C	T/C	NA	T/C	T/T	T/T	NA	T/T	T/T	T/T	T/T	T/C	T/T	NA	NA	T/T	T/T	T/T	NA	T/T	T/T	T/T	T/C	T/T	NA	T/T	T/T	T/T	T/T	T/T	T/T	T/T	T/T	T/T	T/T	T/C	T/C	T/C	T/C
ST4.03ch02pos41655069.1	2	41655069	T/T	T/T	T/T	NA	T/C	T/T	T/C	T/T	T/C	T/C	NA	T/C	T/T	T/T	NA	T/T	T/T	T/T	T/T	T/C	T/T	NA	NA	T/T	T/T	T/T	NA	T/T	T/T	T/T	T/C	T/T	NA	T/T	T/T	T/T	T/T	T/T	T/T	T/T	T/T	T/T	T/T	T/C	T/C	T/C	T/C
ST4.03ch02pos41655080.1	2	41655080	T/T	T/T	T/T	NA	T/A	T/T	T/A	T/T	T/A	T/A	NA	T/A	T/T	T/T	NA	T/T	T/T	T/T	T/T	T/A	T/T	NA	NA	T/T	T/T	T/T	NA	T/T	T/T	T/T	T/A	T/T	NA	T/T	T/T	T/T	T/T	T/T	T/T	T/T	T/T	T/T	T/T	T/A	T/A	T/A	T/A
ST4.03ch02pos41661412.1	2	41661412	C/C	NA	T/C	T/T	T/T	T/T	T/C	T/C	T/T	C/C	T/T	C/C	T/C	T/T	T/T	T/C	T/C	T/C	T/C	T/T	NA	C/C	T/C	T/C	C/C	NA	T/C	T/C	T/C	T/C	T/T	T/C	C/C	T/T	T/T	T/C	T/C	T/T	T/T	C/C	C/C	T/T	T/C	NA	NA	T/T	T/T
ST4.03ch02pos41661469.1	2	41661469	A/A	A/A	A/A	A/G	NA	A/A	A/G	A/A	A/G	A/G	A/G	A/G	A/A	A/A	A/G	A/A	A/A	A/A	A/A	A/G	NA	A/G	A/A	A/A	A/A	A/A	A/A	A/A	A/A	A/A	A/G	A/A	NA	A/A	A/A	A/A	A/A	A/A	A/A	A/A	A/A	A/A	A/A	A/G	A/G	A/G	A/G
ST4.03ch02pos41661479.1	2	41661479	T/T	T/T	T/T	T/G	NA	T/T	T/G	T/T	T/G	T/G	T/G	T/G	T/T	T/T	T/G	T/T	T/T	T/T	T/T	T/G	NA	T/G	T/T	T/T	T/T	T/T	T/T	T/T	T/T	T/T	T/G	T/T	NA	T/T	T/T	T/T	T/T	T/T	T/T	T/T	T/T	T/T	T/T	T/G	T/G	T/G	T/G
ST4.03ch02pos41661485.1	2	41661485	T/T	NA	C/T	C/C	C/C	C/C	C/T	C/T	C/C	C/T	C/C	C/T	C/T	C/C	C/C	C/T	C/T	C/T	C/T	C/C	NA	C/T	C/T	C/T	T/T	NA	C/T	C/T	C/T	C/T	C/C	C/T	NA	C/C	C/C	C/T	C/T	C/C	C/C	T/T	T/T	C/C	C/T	C/C	C/T	C/C	C/C
ST4.03ch02pos41711341.1	2	41711341	G/G	G/G	G/G	G/C	G/C	G/G	G/C	G/G	G/C	G/C	G/C	G/C	G/G	G/G	G/C	G/G	G/G	G/G	G/G	G/C	G/G	G/C	G/G	G/G	G/G	G/G	G/G	G/G	G/G	G/G	G/C	G/G	G/C	G/G	G/G	G/G	G/G	G/G	G/G	G/G	G/G	G/G	G/G	G/C	G/C	G/C	G/C
ST4.03ch02pos41711401.1	2	41711401	A/A	A/A	A/A	A/G	A/G	A/A	A/G	A/A	A/G	A/G	A/G	A/G	A/A	A/A	A/G	A/A	A/A	A/A	A/A	A/G	A/A	A/G	A/A	A/A	A/A	A/A	A/A	A/A	A/A	A/A	A/G	A/A	A/G	A/A	A/A	A/A	A/A	A/A	A/A	A/A	A/A	A/A	A/A	A/G	A/G	A/G	A/G
ST4.03ch02pos41742000.1	2	41742000	G/A	G/A	G/A	G/G	G/A	G/A	G/A	A/A	G/G	A/A	G/G	A/A	G/A	G/A	G/G	G/A	G/A	G/A	G/A	G/G	G/G	G/A	G/A	G/A	G/A	G/A	G/A	G/A	G/A	NA	A/A	G/G	G/A	G/G	G/G	G/A	G/G	G/A	G/G	A/A	G/A	G/A	G/A	G/G	G/A	G/G	G/G
ST4.03ch02pos41756090.1	2	41756090	G/G	G/G	G/G	G/T	G/G	G/G	G/T	G/G	G/T	G/T	G/T	G/T	G/G	G/G	G/T	G/G	G/G	G/G	G/G	G/T	G/G	NA	G/G	G/G	G/G	G/G	G/G	G/G	G/G	G/G	G/T	G/G	NA	G/G	G/G	G/G	G/G	G/G	G/G	G/G	G/G	G/G	G/G	G/T	G/T	G/T	G/T
ST4.03ch02pos41756151.1	2	41756151	G/G	G/G	NA	G/G	G/A	G/A	NA	G/A	G/G	G/G	G/G	G/G	G/A	G/A	G/G	G/A	G/G	G/A	G/G	G/G	G/G	G/G	G/A	G/A	G/A	G/A	G/A	G/A	G/A	NA	A/A	G/G	G/G	G/G	G/G	G/A	G/G	G/A	G/G	A/A	G/A	G/A	G/A	G/G	G/G	G/G	G/G
ST4.03ch02pos41885928.1	2	41885928	C/A	NA	C/A	C/C	C/A	C/A	C/C	A/A	C/C	C/A	C/C	C/A	C/A	C/A	C/C	NA	C/A	C/A	C/A	C/C	NA	C/A	C/A	C/A	C/C	NA	NA	C/A	C/A	C/A	C/A	C/C	NA	C/C	C/C	C/A	C/A	C/A	C/A	A/A	C/C	C/A	C/A	C/C	C/A	C/C	C/C
ST4.03ch02pos41885929.1	2	41885929	T/G	NA	T/G	T/T	T/G	T/G	T/T	G/G	T/T	T/G	T/T	NA	T/G	T/G	T/T	NA	T/G	T/G	T/G	T/T	NA	T/G	T/G	T/G	T/T	NA	NA	T/G	T/G	T/G	T/G	T/T	NA	T/T	T/T	T/G	T/G	T/G	T/G	G/G	T/T	T/G	T/G	T/T	T/G	T/T	T/T
ST4.03ch02pos42027305.1	2	42027305	T/A	T/A	T/A	T/T	T/A	T/A	NA	T/A	T/T	T/T	T/T	T/T	T/A	T/A	T/T	T/A	T/T	T/A	T/T	T/T	T/A	NA	T/A	T/A	A/A	T/A	T/A	T/A	T/A	T/A	T/A	T/A	A/A	T/T	T/T	T/A	T/A	T/A	T/T	A/A	A/A	T/A	T/A	T/T	T/T	T/T	T/T
ST4.03ch02pos42098279.1	2	42098279	A/A	NA	A/A	NA	NA	A/A	A/G	A/A	A/G	G/G	NA	G/G	A/A	A/A	NA	A/A	A/A	A/A	NA	A/G	NA	NA	A/A	A/A	A/A	A/A	A/A	A/A	A/A	A/A	A/G	A/A	A/A	A/A	A/A	A/A	A/A	A/A	A/A	A/A	A/A	A/A	A/A	A/G	G/G	A/G	A/G
ST4.03ch02pos42098292.1	2	42098292	G/G	NA	G/G	NA	NA	G/G	G/A	G/G	G/A	A/A	NA	A/A	G/G	G/G	NA	G/G	G/G	G/G	NA	G/A	NA	NA	G/G	G/G	G/G	G/G	G/G	G/G	G/G	G/G	G/A	G/G	G/G	G/G	G/G	G/G	G/G	G/G	G/G	G/G	G/G	G/G	G/G	G/A	A/A	G/A	G/A
ST4.03ch02pos42362226.1	2	42362226	A/A	T/A	A/A	A/A	T/A	A/A	T/A	A/A	A/A	A/A	A/A	A/A	T/A	A/A	T/A	T/A	A/A	A/A	T/A	T/A	T/A	T/A	T/A	T/A	T/T	T/A	A/A	A/A	T/A	T/A	A/A	T/A	A/A	A/A	A/A	T/A	T/A	T/A	T/A	A/A	T/T	T/A	A/A	A/A	A/A	T/A	A/A
ST4.03ch02pos42371421.1	2	42371421	T/T	NA	T/T	T/T	C/T	T/T	C/T	T/T	T/T	T/T	T/T	T/T	C/T	T/T	C/T	C/T	T/T	T/T	C/T	C/T	C/T	NA	C/T	C/T	C/C	C/T	T/T	T/T	C/T	C/T	T/T	C/T	T/T	T/T	T/T	C/T	C/T	C/T	C/T	T/T	C/C	C/T	T/T	T/T	NA	C/T	T/T
ST4.03ch02pos42484376.1	2	42484376	T/T	T/T	T/T	T/T	C/T	T/T	C/T	T/T	T/T	T/T	T/T	T/T	C/T	T/T	C/T	C/T	T/T	T/T	C/T	C/T	C/T	NA	C/T	NA	C/C	T/T	T/T	T/T	C/T	C/T	T/T	C/T	T/T	T/T	T/T	C/T	C/T	C/T	C/T	T/T	C/C	C/T	T/T	T/T	NA	C/T	T/T
ST4.03ch02pos42484408.1	2	42484408	G/G	G/G	G/T	G/G	G/T	G/T	G/G	G/T	G/G	G/G	G/G	G/G	G/T	G/T	G/G	G/T	G/G	G/T	G/G	G/G	G/G	G/G	NA	NA	G/G	NA	G/T	G/T	G/T	G/T	G/T	G/G	NA	G/G	G/G	G/T	G/G	G/T	G/G	T/T	G/G	G/T	G/T	G/G	G/G	G/G	G/G
ST4.03ch02pos42514375.1	2	42514375	T/C	T/C	T/C	C/C	T/T	T/C	T/C	T/C	C/C	C/C	C/C	C/C	T/T	T/C	T/C	T/T	C/C	T/C	T/C	T/C	T/T	T/C	T/T	T/T	T/T	T/C	T/C	T/C	T/C	T/C	T/C	T/T	C/C	C/C	C/C	T/C	T/C	T/T	T/C	T/T	T/T	T/T	T/C	C/C	C/C	T/C	C/C
ST4.03ch02pos42514396.1	2	42514396	C/C	C/C	C/C	C/C	C/T	C/C	C/T	C/C	C/C	C/C	C/C	C/C	C/T	C/C	C/T	C/T	C/C	C/C	C/T	C/T	C/T	C/T	C/T	C/T	T/T	C/C	C/C	C/C	C/T	C/T	C/C	C/T	C/C	C/C	C/C	C/T	C/T	C/T	C/T	C/C	T/T	C/T	C/C	C/C	C/C	C/T	C/C
ST4.03ch02pos42737691.1	2	42737691	G/A	NA	A/A	G/A	G/A	A/A	G/A	A/A	G/A	G/A	G/A	G/A	A/A	A/A	G/A	A/A	A/A	A/A	G/A	G/A	G/G	NA	A/A	A/A	G/A	NA	NA	A/A	G/A	G/A	G/A	G/G	G/A	G/A	G/A	G/A	G/G	G/A	A/A	A/A	G/A	G/A	A/A	G/A	G/A	G/A	G/A
ST4.03ch02pos42771415.1	2	42771415	C/C	C/C	C/C	C/C	C/C	C/C	C/C	C/C	C/C	C/C	C/C	C/C	C/C	C/C	C/C	C/C	C/C	C/C	C/C	C/C	C/C	C/C	C/C	C/C	C/C	C/C	C/C	C/C	C/C	C/C	C/C	C/C	C/C	C/C	C/C	C/C	C/C	C/C	C/C	C/C	C/C	C/C	C/C	C/C	C/C	C/C	C/C
ST4.03ch02pos42848129.1	2	42848129	A/A	A/A	NA	G/G	A/A	A/G	A/A	A/A	NA	A/A	NA	A/A	A/A	A/G	A/A	A/A	A/A	NA	A/A	A/A	NA	NA	A/A	A/A	A/A	NA	A/G	A/G	NA	A/A	A/A	A/A	NA	G/G	G/G	A/A	A/A	A/A	G/G	A/A	A/A	A/A	A/G	G/G	A/A	A/A	G/G
ST4.03ch02pos42927289.1	2	42927289	C/T	C/T	C/T	C/T	C/T	C/T	C/T	C/T	C/T	C/T	C/T	C/T	C/C	C/T	C/T	C/C	T/T	C/T	C/T	C/C	C/C	C/T	C/C	C/C	C/C	C/T	C/T	C/T	C/T	C/T	C/C	C/C	C/C	C/T	C/T	C/T	C/C	C/C	C/T	C/C	C/C	C/C	C/T	C/T	C/T	C/T	C/T
ST4.03ch02pos43062810.1	2	43062810	C/A	C/A	C/A	C/A	C/C	C/A	C/A	C/A	C/A	C/A	C/A	C/A	C/C	C/A	C/A	C/C	A/A	C/A	C/A	C/C	C/C	C/A	C/C	C/C	C/A	C/A	C/A	C/A	C/A	C/A	C/C	C/C	C/C	C/A	C/A	C/C	C/C	C/C	C/A	C/C	C/A	C/C	C/A	C/A	C/A	C/A	C/A
ST4.03ch02pos43088588.1	2	43088588	A/A	A/C	A/C	A/A	A/C	A/C	A/C	A/C	A/A	A/A	A/A	A/A	A/C	A/C	A/A	A/C	A/A	A/C	A/A	A/C	A/A	A/A	A/C	A/C	A/C	A/C	A/C	A/C	A/C	A/C	A/C	A/A	A/A	A/A	A/A	A/C	A/A	A/C	A/A	A/C	A/C	A/C	A/C	A/A	A/A	A/A	A/A
ST4.03ch02pos43088614.1	2	43088614	C/C	C/C	C/C	C/C	C/C	C/C	C/C	C/C	C/C	C/C	C/C	C/C	C/C	C/C	C/C	C/C	C/C	C/C	C/C	C/C	C/C	C/C	C/C	C/C	C/C	C/C	C/C	C/C	C/C	C/C	C/C	C/C	C/C	C/C	C/C	C/C	C/C	C/C	C/C	C/C	C/C	C/C	C/C	C/C	C/C	C/C	C/C
ST4.03ch02pos43088625.1	2	43088625	C/C	C/C	C/C	C/C	C/C	C/C	C/C	C/C	C/C	C/C	C/C	C/C	C/C	C/C	C/C	C/C	C/C	C/C	C/C	C/C	C/C	C/C	C/C	C/C	C/C	C/C	C/C	C/C	C/C	C/C	C/C	C/C	C/C	C/C	C/C	C/C	C/C	C/C	C/C	C/C	C/C	C/C	C/C	C/C	C/C	C/C	C/C
ST4.03ch02pos43168680.1	2	43168680	C/C	C/C	C/C	G/C	G/C	C/C	G/C	C/C	G/C	G/C	G/C	G/C	C/C	C/C	G/C	C/C	C/C	C/C	G/C	G/C	G/C	G/C	C/C	C/C	C/C	C/C	C/C	C/C	G/C	G/C	G/C	G/C	NA	C/C	C/C	G/C	G/C	G/C	G/C	C/C	C/C	G/C	C/C	G/C	G/C	G/C	G/C
ST4.03ch02pos43168724.1	2	43168724	A/A	NA	A/A	A/A	A/A	A/A	A/A	A/A	A/A	A/A	A/A	A/A	A/T	A/A	A/A	A/T	A/A	A/A	A/A	A/A	A/A	A/A	A/T	A/T	A/A	A/A	A/A	A/A	A/A	A/T	A/A	A/A	A/T	A/A	A/A	A/A	A/A	A/A	A/A	A/T	A/A	A/A	A/A	A/A	A/A	A/A	A/A
ST4.03ch02pos43250828.1	2	43250828	T/G	NA	T/T	T/T	T/G	NA	NA	T/G	T/T	T/G	T/T	T/G	T/G	T/T	G/G	NA	T/G	T/T	G/G	T/T	NA	NA	NA	T/G	T/G	NA	T/T	T/T	T/G	T/G	T/T	T/G	G/G	T/T	T/T	T/G	T/G	T/G	NA	T/G	T/G	T/G	T/T	T/T	T/G	G/G	T/T
ST4.03ch02pos43250843.1	2	43250843	C/C	NA	C/C	C/C	C/C	C/C	C/C	C/C	C/C	C/C	C/C	C/C	C/T	C/C	C/C	NA	C/C	C/C	C/C	C/C	NA	C/C	NA	C/T	C/C	C/C	C/C	C/C	C/C	C/T	C/C	C/C	T/T	C/C	C/C	C/C	NA	C/C	NA	C/T	C/C	C/C	C/C	C/C	C/C	C/C	C/C
ST4.03ch02pos43326864.1	2	43326864	T/C	T/C	T/T	T/T	NA	T/T	T/C	T/C	T/T	T/C	T/T	T/C	T/T	T/T	T/C	T/T	T/C	T/T	T/C	T/T	T/T	T/C	T/T	T/T	T/T	T/T	T/T	T/T	T/T	NA	T/T	T/T	NA	T/T	T/T	T/T	T/T	T/T	T/T	T/T	T/T	T/T	T/T	T/T	T/C	T/C	T/T
ST4.03ch02pos43434871.1	2	43434871	G/G	A/G	G/G	G/G	A/G	G/G	A/G	G/G	G/G	G/G	G/G	G/G	A/A	G/G	A/G	A/A	A/G	G/G	A/G	A/G	A/G	NA	A/G	A/A	A/G	A/G	A/G	G/G	A/G	A/G	G/G	A/G	A/G	G/G	G/G	A/G	A/G	A/G	G/G	A/G	A/G	A/G	G/G	G/G	G/G	A/G	G/G
ST4.03ch02pos43434895.1	2	43434895	C/C	A/C	C/C	C/C	A/C	C/C	A/C	C/C	C/C	C/C	C/C	C/C	A/A	C/C	A/C	A/A	A/C	C/C	A/C	A/C	A/C	NA	A/C	A/A	A/C	A/C	A/C	C/C	A/C	A/C	C/C	A/C	A/C	C/C	C/C	A/C	A/C	A/C	C/C	A/C	A/C	A/C	C/C	C/C	C/C	A/C	C/C
ST4.03ch02pos43434917.1	2	43434917	A/A	T/A	A/A	A/A	T/A	A/A	T/A	A/A	A/A	A/A	A/A	A/A	T/T	A/A	T/A	T/T	T/A	A/A	T/A	T/A	T/A	NA	T/A	T/T	T/A	T/A	T/A	A/A	T/A	T/A	A/A	T/A	T/A	A/A	A/A	T/A	T/A	T/A	A/A	T/A	T/A	T/A	A/A	A/A	A/A	T/A	A/A
ST4.03ch02pos43434919.1	2	43434919	C/C	T/C	C/C	C/C	T/C	C/C	T/C	C/C	C/C	C/C	C/C	C/C	T/T	C/C	T/C	T/T	T/C	C/C	T/C	T/C	T/C	NA	T/C	T/T	T/C	T/C	T/C	C/C	T/C	T/C	C/C	T/C	T/C	C/C	C/C	T/C	T/C	T/C	C/C	T/C	T/C	T/C	C/C	C/C	C/C	T/C	C/C
ST4.03ch02pos43437449.1	2	43437449	C/C	NA	T/T	C/T	NA	T/T	C/C	C/T	C/T	C/C	C/T	C/C	C/C	T/T	NA	C/C	C/C	T/T	C/C	C/C	C/C	C/C	C/C	C/C	C/T	NA	C/T	T/T	C/T	C/T	C/T	C/C	NA	C/T	C/T	C/T	C/C	C/T	C/T	C/T	C/T	C/T	T/T	C/T	C/C	C/C	C/T
ST4.03ch02pos43450715.1	2	43450715	G/T	G/T	T/T	G/T	T/T	T/T	G/T	T/T	G/T	G/T	G/T	G/T	G/G	T/T	T/T	G/G	G/T	T/T	T/T	G/G	G/T	G/T	G/G	G/G	G/T	G/T	G/T	T/T	G/T	G/T	G/T	G/T	G/T	G/T	G/T	G/T	G/T	T/T	T/T	G/T	G/T	T/T	T/T	G/T	G/T	T/T	G/T
ST4.03ch02pos43450740.1	2	43450740	C/A	C/A	A/A	C/A	A/A	A/A	C/A	A/A	C/A	C/A	C/A	C/A	C/C	A/A	A/A	C/C	C/A	A/A	A/A	C/C	C/A	C/A	C/C	C/C	C/A	C/A	C/A	A/A	C/A	C/A	C/A	C/A	C/A	C/A	C/A	C/A	C/A	A/A	A/A	C/A	C/A	A/A	A/A	C/A	C/A	A/A	C/A
ST4.03ch02pos43524116.1	2	43524116	C/T	C/T	C/T	C/T	C/T	C/T	C/T	C/T	C/T	C/T	C/T	C/T	C/C	C/T	T/T	C/C	C/T	C/T	T/T	C/C	C/T	C/T	NA	C/C	C/C	C/T	C/T	C/T	C/T	C/T	C/C	C/T	NA	C/T	C/T	C/T	C/T	C/T	C/T	C/C	C/C	C/T	C/T	C/T	C/T	T/T	C/T
ST4.03ch02pos43524117.1	2	43524117	G/A	NA	G/G	G/A	G/G	G/G	G/G	G/G	G/A	G/A	G/A	G/A	G/G	G/G	G/G	G/G	G/G	G/G	G/G	G/A	G/A	G/A	G/G	G/G	G/A	G/G	G/G	G/G	G/A	G/A	G/A	G/A	G/G	G/A	G/A	G/A	G/A	G/G	G/G	G/G	G/A	G/G	G/G	G/A	G/A	G/G	G/A
ST4.03ch02pos43675803.1	2	43675803	A/T	A/T	A/T	A/T	A/T	A/T	A/T	A/T	A/T	A/T	A/T	A/T	A/A	A/T	T/T	A/A	A/T	A/T	T/T	A/T	A/T	A/T	A/T	A/A	A/A	A/T	A/T	A/T	A/T	A/T	A/A	A/T	A/T	A/T	A/T	A/T	A/T	A/T	A/T	A/A	A/A	A/T	A/T	A/T	A/T	T/T	A/T
ST4.03ch02pos43675846.1	2	43675846	A/A	A/G	A/G	A/A	A/G	A/G	A/G	A/G	A/A	A/A	A/A	A/A	A/G	A/G	A/A	A/G	A/A	A/G	A/A	A/G	A/A	A/A	A/G	A/G	A/G	A/G	A/G	A/G	A/G	A/G	A/G	A/A	A/G	A/A	A/A	A/G	A/A	A/G	A/A	A/G	A/G	A/G	A/G	A/A	A/A	A/A	A/A
ST4.03ch02pos43704369.1	2	43704369	T/T	T/C	C/C	T/T	C/C	C/C	C/C	C/C	T/T	T/T	T/T	T/T	T/C	C/C	NA	T/C	T/T	C/C	NA	C/C	T/T	T/T	T/C	T/C	T/C	T/C	C/C	C/C	T/C	T/C	T/C	T/T	T/C	T/T	T/T	T/C	T/T	C/C	T/T	T/C	T/C	C/C	C/C	T/T	T/T	NA	T/T
ST4.03ch02pos43704370.1	2	43704370	T/T	C/T	C/C	T/T	C/C	C/C	C/C	C/C	T/T	T/T	T/T	T/T	C/C	C/C	NA	C/C	T/T	C/C	NA	C/C	T/T	T/T	C/C	C/C	C/C	C/T	C/C	C/C	C/T	C/T	C/T	T/T	C/C	T/T	C/T	C/T	C/T	C/C	C/T	C/C	C/C	C/C	C/C	T/T	T/T	NA	T/T
ST4.03ch02pos43726568.1	2	43726568	C/A	C/A	C/C	C/A	C/C	C/C	C/C	C/C	C/A	C/A	C/A	C/A	C/C	C/C	C/C	C/C	C/A	C/C	C/C	C/C	C/A	C/A	C/C	C/C	C/C	NA	C/C	C/C	C/A	C/A	C/A	C/A	C/C	C/A	C/A	C/A	C/A	C/C	C/A	C/C	C/C	C/C	C/C	C/A	C/A	C/C	C/A
ST4.03ch02pos43782580.1	2	43782580	T/G	T/G	T/G	T/T	T/G	T/G	T/G	T/G	T/T	T/G	T/T	T/G	G/G	T/G	T/G	G/G	G/G	T/G	T/G	T/G	T/T	T/G	G/G	G/G	T/G	T/G	T/G	T/G	T/G	T/G	T/G	T/T	T/T	T/T	T/T	T/G	T/T	T/G	T/G	G/G	T/G	T/G	T/G	T/T	T/G	T/G	T/T
ST4.03ch02pos43782595.1	2	43782595	A/G	A/G	A/G	A/A	A/G	A/G	A/G	A/G	A/A	A/G	A/A	A/G	G/G	A/G	A/G	G/G	G/G	A/G	A/G	A/G	A/A	A/G	G/G	G/G	A/G	A/G	A/G	A/G	A/G	A/G	A/G	A/A	A/A	A/A	A/A	A/G	A/A	A/G	A/G	G/G	A/G	A/G	A/G	A/A	A/G	A/G	A/A
ST4.03ch02pos43782619.1	2	43782619	G/A	G/A	G/A	G/G	G/A	G/A	G/A	G/A	G/G	G/A	G/G	G/A	A/A	G/A	G/A	A/A	A/A	G/A	G/A	G/A	G/G	G/A	A/A	A/A	G/A	G/A	G/A	G/A	G/A	G/A	G/A	G/G	G/G	G/G	G/G	G/A	G/G	G/A	G/A	A/A	G/A	G/A	G/A	G/G	G/A	G/A	G/G
ST4.03ch02pos43852174.1	2	43852174	T/C	T/C	T/C	T/C	T/C	T/C	T/C	T/C	T/C	T/C	T/C	T/C	T/C	T/C	T/C	T/C	T/C	T/C	T/C	T/C	NA	T/C	T/C	T/C	T/C	T/C	T/C	T/T	T/C	T/C	T/T	T/C	T/C	T/C	T/T	T/C	T/C	T/T	T/T	T/T	T/C	T/T	T/C	T/C	T/C	T/C	T/C
ST4.03ch02pos43852176.1	2	43852176	C/G	C/G	C/G	C/G	C/G	C/G	C/G	C/G	C/G	C/G	C/G	C/G	C/G	C/G	C/G	C/G	C/G	C/G	C/G	C/G	NA	C/G	C/G	C/G	C/G	C/G	C/G	C/C	C/G	C/G	C/C	C/G	C/G	C/G	C/C	C/G	C/G	C/C	C/C	C/C	C/G	C/C	C/G	C/G	C/G	C/G	C/G
ST4.03ch02pos43852200.1	2	43852200	A/G	A/G	A/G	A/G	A/G	A/G	A/G	A/G	A/G	A/G	A/G	A/G	A/G	A/G	A/G	A/G	A/G	A/G	A/G	A/G	NA	A/G	A/G	A/G	A/G	A/G	A/G	A/A	A/G	A/G	A/A	A/G	A/G	A/G	A/A	A/G	A/G	A/A	A/A	A/A	A/G	A/A	A/G	A/G	A/G	A/G	A/G
ST4.03ch02pos43852208.1	2	43852208	C/T	C/T	C/T	C/T	C/T	C/T	C/T	C/T	C/T	C/T	C/T	C/T	C/T	C/T	C/T	C/T	C/T	C/T	C/T	C/T	NA	C/T	C/T	C/T	C/T	C/T	C/T	C/C	C/T	C/T	C/C	C/T	C/T	C/T	C/C	C/T	C/T	C/C	C/C	C/C	C/T	C/C	C/T	C/T	C/T	C/T	C/T
ST4.03ch02pos43852211.1	2	43852211	A/G	A/G	A/G	A/G	A/G	A/G	A/G	A/G	A/G	A/G	A/G	A/G	A/G	A/G	A/G	A/G	A/G	A/G	A/G	A/G	NA	A/G	A/G	A/G	A/G	A/G	A/G	A/A	A/G	A/G	A/A	A/G	A/G	A/G	A/A	A/G	A/G	A/A	A/A	A/A	A/G	A/A	A/G	A/G	A/G	A/G	A/G
ST4.03ch02pos43946639.1	2	43946639	G/C	G/C	G/C	G/G	C/C	G/C	C/C	C/C	G/G	G/C	G/G	G/C	G/C	G/C	C/C	G/C	G/C	G/C	C/C	C/C	G/G	G/C	G/C	G/C	G/G	G/C	G/C	G/C	G/C	G/C	G/C	G/G	G/G	G/G	G/G	G/C	G/C	C/C	G/G	G/C	G/G	C/C	G/C	G/G	G/C	C/C	G/G
ST4.03ch02pos44021609.1	2	44021609	G/G	A/G	G/G	G/G	G/G	G/G	G/G	G/G	G/G	G/G	G/G	G/G	G/G	G/G	G/G	G/G	A/G	G/G	G/G	G/G	G/G	G/G	G/G	G/G	A/G	A/G	G/G	G/G	G/G	A/G	G/G	G/G	A/G	G/G	G/G	G/G	G/G	G/G	A/G	G/G	A/G	G/G	G/G	G/G	G/G	G/G	G/G
ST4.03ch02pos44021631.1	2	44021631	C/C	G/C	C/C	C/C	C/C	C/C	C/C	C/C	C/C	C/C	C/C	C/C	C/C	C/C	C/C	C/C	G/C	C/C	C/C	C/C	C/C	C/C	C/C	C/C	G/C	G/C	C/C	C/C	C/C	G/C	C/C	C/C	G/C	C/C	C/C	C/C	C/C	C/C	G/C	C/C	G/C	C/C	C/C	C/C	C/C	C/C	C/C
ST4.03ch02pos44162410.1	2	44162410	G/G	A/G	G/G	G/G	G/G	G/G	G/G	G/G	G/G	G/G	G/G	G/G	G/G	G/G	G/G	G/G	A/G	G/G	G/G	G/G	G/G	G/G	G/G	G/G	A/G	A/G	G/G	G/G	G/G	A/G	G/G	G/G	A/G	G/G	G/G	G/G	G/G	G/G	A/G	G/G	A/G	G/G	G/G	G/G	G/G	G/G	G/G
ST4.03ch02pos44252078.1	2	44252078	A/T	NA	A/A	A/T	A/T	A/A	A/T	A/T	A/T	A/T	A/T	A/T	A/T	A/A	A/T	A/T	A/A	A/A	A/T	A/T	A/T	A/A	A/T	A/T	A/T	A/A	A/A	A/A	NA	A/T	A/T	A/T	A/A	A/T	A/T	A/T	A/T	A/T	A/A	A/T	A/T	A/T	A/A	A/T	A/T	A/T	A/T
ST4.03ch02pos44268587.1	2	44268587	C/C	NA	C/C	C/C	C/C	C/C	C/C	C/C	C/C	C/C	C/C	C/C	C/C	C/C	C/C	C/C	T/C	C/C	C/C	C/C	C/C	C/C	C/C	C/C	T/C	T/C	C/C	C/C	C/C	T/C	C/C	C/C	T/C	C/C	C/C	C/C	C/C	C/C	T/C	C/C	T/C	C/C	C/C	C/C	C/C	C/C	C/C
ST4.03ch02pos44346144.1	2	44346144	C/T	C/T	T/T	C/T	C/T	T/T	C/T	C/T	C/T	C/T	C/T	C/T	C/T	T/T	C/T	C/T	C/T	T/T	C/T	C/T	C/T	C/T	C/T	C/T	C/C	C/T	T/T	T/T	C/T	C/T	C/T	C/T	C/C	C/T	C/T	C/T	C/T	C/T	C/T	C/T	C/C	C/T	T/T	C/T	C/T	C/T	C/T
ST4.03ch02pos44346163.1	2	44346163	C/A	C/A	C/C	C/A	C/A	C/C	C/A	C/A	C/A	C/A	C/A	C/A	C/A	C/C	C/A	C/A	C/C	C/C	C/A	C/A	C/A	C/A	C/A	C/A	C/A	C/C	C/C	C/C	C/A	C/A	C/A	C/A	C/C	C/A	C/A	C/A	C/A	C/A	C/C	C/A	C/A	C/A	C/C	C/A	C/A	C/A	C/A
ST4.03ch02pos44346165.1	2	44346165	A/G	A/G	A/A	A/G	A/G	A/A	A/G	A/G	A/G	A/G	A/G	A/G	A/G	A/A	A/G	A/G	A/A	A/A	A/G	A/G	A/G	A/G	A/G	A/G	A/G	A/A	A/A	A/A	A/G	A/G	A/G	A/G	A/A	A/G	A/G	A/G	A/G	A/G	A/A	A/G	A/G	A/G	A/A	A/G	A/G	A/G	A/G
ST4.03ch02pos44346195.1	2	44346195	A/G	A/G	A/A	A/G	A/G	A/A	A/G	A/G	A/G	A/G	A/G	A/G	A/G	A/A	A/G	A/G	A/A	A/A	A/G	A/G	A/G	A/G	A/G	A/G	A/G	A/A	A/A	A/A	A/G	A/G	A/G	A/G	A/A	A/G	A/G	A/G	A/G	A/G	A/A	A/G	A/G	A/G	A/A	A/G	A/G	A/G	A/G
ST4.03ch02pos44346235.1	2	44346235	A/T	A/T	A/A	A/T	A/T	A/A	A/T	A/T	A/T	A/T	A/T	A/T	A/T	A/A	A/T	A/T	A/A	A/A	A/T	A/T	A/T	A/T	A/T	A/T	A/T	A/A	A/A	A/A	A/T	A/T	A/T	A/T	A/A	A/T	A/T	A/T	A/T	A/T	A/A	A/T	A/T	A/T	A/A	A/T	A/T	A/T	A/T
ST4.03ch02pos44346240.1	2	44346240	T/C	T/C	T/T	T/C	T/C	T/T	T/C	T/C	T/C	T/C	T/C	T/C	T/C	T/T	T/C	T/C	T/T	T/T	T/C	T/C	T/C	T/C	T/C	T/C	T/C	T/T	T/T	T/T	T/C	T/C	T/C	T/C	T/T	T/C	T/C	T/C	T/C	T/C	T/T	T/C	T/C	T/C	T/T	T/C	T/C	T/C	T/C
ST4.03ch02pos44458965.1	2	44458965	T/G	T/G	T/T	T/T	T/G	T/T	T/G	T/G	T/T	T/T	T/T	T/T	T/T	T/T	T/G	T/T	T/T	T/T	T/G	T/G	T/G	NA	T/T	T/T	T/G	T/T	T/T	T/T	T/G	T/G	T/T	T/G	NA	T/T	T/T	T/G	T/G	T/G	T/T	T/T	T/G	T/G	T/T	T/T	NA	T/G	T/T
ST4.03ch02pos44458982.1	2	44458982	C/T	NA	C/C	C/C	C/T	C/C	C/T	C/T	C/C	C/C	C/C	C/C	C/C	C/C	C/T	C/C	C/C	C/C	C/T	C/T	C/T	NA	C/C	C/C	C/T	C/C	C/C	C/C	C/T	C/T	C/C	C/T	NA	C/C	C/C	C/T	C/T	C/T	C/C	C/C	C/T	C/T	C/C	C/C	C/C	C/T	C/C
ST4.03ch02pos44458985.1	2	44458985	C/T	NA	C/C	C/C	C/T	C/C	C/T	C/T	C/C	C/C	C/C	C/C	C/C	C/C	C/T	C/C	C/C	C/C	C/T	C/T	C/T	NA	C/C	C/C	C/T	C/C	C/C	C/C	C/T	C/T	C/C	C/T	NA	C/C	C/C	C/T	C/T	C/T	C/C	C/C	C/T	C/T	C/C	C/C	C/C	C/T	C/C
ST4.03ch02pos44527652.1	2	44527652	C/C	C/C	C/C	C/C	C/C	C/C	C/C	C/C	C/C	C/C	C/C	C/C	C/C	C/C	C/C	NA	C/T	C/C	C/C	C/C	C/C	NA	C/C	C/C	C/T	C/C	C/C	C/C	C/C	NA	C/C	C/C	NA	C/C	C/C	C/C	C/T	C/C	NA	C/C	C/T	C/C	C/C	C/C	C/C	C/C	C/C
ST4.03ch02pos44528143.1	2	44528143	G/A	G/G	G/G	G/G	G/G	G/G	G/G	G/G	G/G	G/G	G/G	G/G	G/G	G/G	G/G	G/G	G/A	G/G	NA	G/G	NA	NA	G/G	G/G	A/A	G/G	G/G	G/G	NA	G/A	G/G	NA	NA	G/G	G/G	G/A	G/A	G/G	G/A	G/G	G/A	G/G	G/G	G/G	G/G	G/G	G/G
ST4.03ch02pos44546269.1	2	44546269	A/G	A/A	A/A	A/A	A/A	A/A	A/A	A/A	A/A	A/A	A/A	A/A	A/A	A/A	A/A	A/A	A/A	A/A	A/A	A/A	A/G	NA	A/A	A/A	A/G	A/A	A/A	A/A	A/G	A/A	A/A	A/G	A/A	A/A	A/A	A/G	A/G	A/A	A/A	A/A	A/G	A/A	A/A	A/A	A/A	A/A	A/A
ST4.03ch02pos44562240.1	2	44562240	C/T	NA	C/C	C/C	C/C	C/C	C/C	C/C	C/C	C/C	C/C	C/C	C/C	C/C	C/C	C/C	C/C	C/C	C/C	C/C	C/T	C/T	C/C	C/C	C/T	C/C	C/C	C/C	C/T	NA	C/C	C/T	C/C	C/C	C/C	C/T	C/T	C/C	C/C	C/C	C/T	C/C	C/C	C/C	C/C	C/C	C/C
ST4.03ch02pos44601682.1	2	44601682	T/A	T/T	T/T	T/T	T/T	T/T	T/T	T/T	T/T	T/T	T/T	T/T	T/T	T/T	T/T	T/T	T/T	T/T	T/T	T/T	T/A	T/A	T/T	T/T	T/A	T/T	T/T	T/T	T/A	T/A	T/T	T/A	T/T	T/T	T/T	T/A	T/A	T/T	T/T	T/T	T/A	T/T	T/T	T/T	T/T	T/T	T/T
ST4.03ch02pos44631626.1	2	44631626	T/C	NA	T/C	C/C	T/C	T/C	T/T	T/T	C/C	T/C	C/C	T/C	T/T	T/C	NA	T/T	T/T	T/C	T/T	T/T	C/C	NA	NA	T/T	NA	T/C	T/C	T/C	NA	T/C	T/C	C/C	NA	C/C	C/C	T/C	C/C	T/C	C/C	T/T	T/C	T/C	T/C	C/C	T/C	T/T	C/C
ST4.03ch02pos44631640.1	2	44631640	A/A	A/A	A/A	NA	A/C	A/A	A/A	A/A	A/C	A/C	NA	A/C	A/A	A/A	NA	A/A	A/A	A/A	A/A	A/A	A/A	NA	A/A	A/A	A/A	A/A	A/A	A/A	NA	A/A	A/C	A/A	NA	A/C	A/C	A/A	A/A	A/C	NA	A/A	A/A	A/C	A/A	A/C	A/C	A/A	A/C
ST4.03ch02pos44639789.1	2	44639789	T/T	T/T	T/T	NA	T/G	T/T	T/T	T/T	T/G	NA	T/T	T/T	T/T	T/T	T/T	NA	T/T	T/T	T/T	T/T	NA	T/T	T/T	T/T	T/T	T/T	T/T	T/T	T/T	NA	T/T	T/T	T/G	NA	T/G	T/T	T/T	T/T	T/G	T/T	T/T	T/T	T/T	NA	T/G	T/T	T/G
ST4.03ch02pos44639833.1	2	44639833	C/A	NA	C/A	NA	C/C	C/A	C/C	C/C	C/A	C/C	A/A	C/C	C/C	C/A	C/C	NA	C/C	C/A	C/C	C/C	NA	C/A	C/C	C/C	NA	NA	C/A	C/A	NA	C/A	C/C	A/A	C/C	NA	C/A	C/A	C/A	C/C	C/A	C/C	C/A	C/C	C/A	NA	C/C	C/C	C/A
ST4.03ch02pos44673349.1	2	44673349	C/T	C/T	C/T	C/T	C/C	C/T	C/C	C/C	C/T	C/C	C/T	C/C	C/C	C/T	C/C	C/C	C/C	C/T	C/C	C/C	T/T	C/T	C/C	C/C	C/T	C/T	C/T	C/T	C/T	C/T	C/C	T/T	C/C	C/T	C/T	C/T	C/T	C/C	C/T	C/C	C/T	C/C	C/T	C/T	C/C	C/C	C/T
ST4.03ch02pos44673369.1	2	44673369	T/C	T/C	T/C	C/C	T/C	T/C	T/T	T/T	C/C	T/C	C/C	T/C	T/T	T/C	T/T	T/T	T/T	T/C	T/T	T/T	C/C	T/C	T/T	T/T	T/C	T/C	T/C	T/C	T/C	T/C	T/C	C/C	C/C	C/C	C/C	T/C	C/C	T/C	C/C	T/T	T/C	T/C	T/C	C/C	T/C	T/T	C/C
ST4.03ch02pos44760417.1	2	44760417	C/T	C/T	C/T	C/T	C/C	C/T	C/C	C/C	C/T	C/C	C/T	C/C	C/C	C/T	C/C	C/C	C/C	C/T	C/C	C/C	T/T	C/T	C/C	C/C	C/T	C/T	C/T	C/T	C/T	C/T	C/C	T/T	C/T	C/T	C/T	C/T	C/T	C/C	C/T	C/C	C/T	C/C	C/T	C/T	C/C	C/C	C/T
ST4.03ch02pos44760454.1	2	44760454	G/A	G/A	G/A	G/A	G/G	G/A	G/G	G/G	G/A	G/G	G/A	G/G	G/G	G/A	G/G	G/G	G/G	G/A	G/G	G/G	A/A	G/A	G/G	G/G	G/A	G/A	G/A	G/A	G/A	G/A	G/G	A/A	G/A	G/A	G/A	G/A	G/A	G/G	G/A	G/G	G/A	G/G	G/A	G/A	G/G	G/G	G/A
ST4.03ch02pos44773000.1	2	44773000	C/T	C/T	C/T	C/T	C/C	C/T	C/C	C/C	C/T	C/C	C/T	C/C	C/C	C/T	C/C	C/C	C/C	C/T	C/C	C/C	T/T	C/T	C/C	C/C	C/T	C/T	C/T	C/T	C/T	C/T	C/C	T/T	C/T	C/T	C/T	C/T	C/T	C/C	C/T	C/C	C/T	C/C	C/T	C/T	C/C	C/C	C/T
ST4.03ch02pos44910920.1	2	44910920	A/A	A/G	A/A	A/A	A/A	A/A	A/A	A/A	A/A	A/A	A/A	A/A	A/G	A/A	A/A	A/G	A/A	A/A	A/A	A/A	A/A	A/A	A/G	A/G	A/A	A/G	A/A	A/A	A/A	A/G	A/A	A/A	A/G	A/G	A/G	A/A	A/A	A/A	A/G	A/G	A/A	A/A	A/A	A/A	A/A	A/A	A/A
ST4.03ch02pos44910959.1	2	44910959	C/C	C/G	C/C	C/C	C/C	C/C	C/C	C/C	C/C	C/C	C/C	C/C	C/G	C/C	C/C	C/G	C/C	C/C	C/C	C/C	C/C	C/C	C/G	C/G	C/C	C/G	C/C	C/C	C/C	C/G	C/C	C/C	G/G	C/G	C/G	C/C	C/G	C/C	C/G	C/G	C/C	C/C	C/C	C/C	C/C	C/C	C/C
ST4.03ch02pos45050783.1	2	45050783	A/A	NA	NA	A/A	A/A	NA	A/A	A/G	A/A	A/A	A/A	A/A	A/G	A/G	A/A	NA	A/G	A/G	A/A	A/A	A/A	NA	NA	A/G	A/A	A/G	NA	A/A	A/A	NA	A/G	NA	NA	A/A	A/A	A/A	NA	A/A	A/G	G/G	A/A	A/A	A/G	A/A	A/A	A/A	A/A
ST4.03ch02pos45286105.1	2	45286105	C/C	C/C	C/C	C/C	C/C	C/C	C/C	C/C	C/C	C/C	C/C	C/C	C/C	C/C	C/C	C/C	C/C	C/C	C/C	C/C	C/C	C/C	C/C	C/C	C/C	C/C	C/C	C/C	C/C	C/C	C/C	C/C	C/C	C/C	C/C	C/C	C/C	C/C	C/C	C/C	C/C	C/C	C/C	C/C	C/C	C/C	C/C
ST4.03ch02pos45292437.1	2	45292437	G/G	NA	G/G	G/G	G/G	G/G	NA	G/G	G/G	NA	G/G	G/A	A/A	G/G	G/A	A/A	G/G	G/G	G/A	G/A	NA	NA	A/A	A/A	G/G	G/G	NA	G/A	G/A	NA	G/G	G/G	NA	G/G	G/G	G/A	G/G	G/G	NA	G/A	G/G	G/G	G/G	G/G	G/A	G/A	G/G
ST4.03ch02pos45311597.1	2	45311597	T/T	T/G	T/G	T/T	T/T	T/T	T/T	T/T	T/T	T/T	T/T	T/T	T/T	T/T	T/T	T/T	T/T	T/G	T/T	T/T	T/T	T/T	T/T	T/T	T/T	T/G	T/T	T/T	T/T	T/T	T/T	T/T	T/G	T/T	T/T	T/T	T/T	T/T	T/T	T/T	T/T	T/T	T/G	T/T	T/T	T/T	T/T
ST4.03ch02pos45432753.1	2	45432753	T/T	C/T	C/C	C/C	C/T	C/C	T/T	C/T	C/C	C/T	C/C	C/T	T/T	C/C	T/T	T/T	C/C	C/C	T/T	T/T	C/T	C/T	T/T	T/T	C/T	C/T	C/T	C/T	C/T	C/T	C/C	C/T	C/T	C/T	C/T	C/T	C/T	C/T	C/T	C/T	C/T	C/T	C/C	C/C	C/T	T/T	C/C
ST4.03ch02pos45673716.1	2	45673716	T/T	NA	T/T	T/T	T/T	T/T	A/T	T/T	T/T	T/T	T/T	T/T	T/T	T/T	T/T	T/T	T/T	T/T	T/T	T/T	T/T	T/T	T/T	T/T	T/T	T/T	A/T	T/T	T/T	T/T	T/T	T/T	NA	T/T	T/T	T/T	T/T	T/T	T/T	T/T	T/T	T/T	T/T	T/T	T/T	T/T	T/T
ST4.03ch02pos45673801.1	2	45673801	A/A	NA	A/A	A/A	A/A	A/A	NA	A/A	A/A	A/A	A/A	A/A	A/A	A/A	A/A	A/A	A/A	A/A	A/A	A/A	NA	A/A	A/A	A/A	A/A	A/A	C/A	A/A	A/A	NA	A/A	A/A	NA	A/A	A/A	A/A	A/A	A/A	A/A	A/A	A/A	A/A	A/A	A/A	A/A	A/A	A/A
ST4.03ch02pos45692351.1	2	45692351	C/T	C/T	C/C	C/C	C/C	C/C	C/C	C/C	C/C	C/C	C/C	C/C	C/C	C/C	C/C	C/C	C/C	C/C	C/C	C/C	C/T	C/C	C/C	C/C	C/T	C/C	C/C	C/C	C/T	C/T	C/C	C/T	C/C	C/T	C/T	C/T	C/T	C/C	C/C	C/C	C/T	C/C	C/C	C/C	C/C	C/C	C/C
ST4.03ch02pos45840488.1	2	45840488	A/A	A/G	A/G	A/G	A/A	A/G	A/A	A/G	A/G	A/A	A/G	A/A	A/A	A/G	A/A	A/A	A/A	A/G	A/A	A/A	A/G	A/G	A/A	A/A	A/G	A/G	A/G	A/G	A/G	A/G	A/A	A/G	A/G	G/G	G/G	A/G	A/G	A/A	A/G	A/A	A/G	A/A	A/G	A/G	A/A	A/A	A/G
ST4.03ch02pos45841169.1	2	45841169	T/T	T/C	T/C	T/C	T/T	T/C	T/T	T/C	T/C	T/T	T/C	T/T	T/T	T/C	T/T	T/T	T/T	T/C	T/T	T/T	T/C	NA	T/T	T/T	T/C	T/C	T/C	T/C	T/C	T/C	T/T	T/C	T/C	C/C	C/C	T/C	T/C	T/T	T/C	T/T	T/C	T/T	T/C	T/C	T/T	T/T	T/C
ST4.03ch02pos45854012.1	2	45854012	G/G	G/A	G/G	G/G	G/G	G/G	G/G	G/G	G/G	G/G	G/G	G/G	G/G	G/G	G/G	G/G	G/G	G/G	G/G	G/G	G/G	G/G	G/G	G/G	G/A	G/A	G/G	G/G	G/G	G/A	G/G	G/G	G/A	G/A	G/A	G/G	NA	G/G	G/A	G/G	G/A	G/G	G/G	G/G	G/G	G/G	G/G
ST4.03ch02pos45854222.1	2	45854222	C/C	NA	NA	C/T	C/C	NA	C/C	C/T	C/T	C/C	C/T	C/C	C/C	C/T	C/C	NA	C/C	C/T	C/C	C/C	NA	NA	C/C	C/C	C/C	C/T	NA	C/T	NA	C/C	C/C	NA	NA	C/T	C/T	C/T	NA	C/C	C/C	C/C	C/C	C/C	C/T	C/T	C/C	C/C	C/T
ST4.03ch02pos45854716.1	2	45854716	A/A	A/C	A/A	A/A	A/A	A/A	A/A	A/A	A/A	A/A	A/A	A/A	A/A	A/A	A/A	A/A	A/A	A/A	A/A	A/A	A/A	A/A	A/A	A/A	A/C	A/C	A/A	A/A	A/A	A/C	A/A	A/A	A/C	A/C	A/C	A/A	A/C	A/A	A/C	A/A	A/C	A/A	A/A	A/A	A/A	A/A	A/A
ST4.03ch02pos45897563.1	2	45897563	G/G	G/G	G/G	G/T	G/G	G/T	G/G	G/T	G/G	G/G	G/T	G/G	G/G	G/T	NA	G/G	G/G	G/T	G/G	NA	NA	NA	G/G	G/G	G/G	G/T	G/T	G/T	NA	NA	G/G	NA	G/G	G/T	G/T	G/T	G/T	G/G	NA	G/G	G/G	G/G	G/T	G/T	G/G	G/G	G/T
ST4.03ch02pos45897621.1	2	45897621	A/A	A/A	A/A	A/T	A/A	A/T	A/A	A/T	A/A	A/A	A/T	A/A	A/A	A/T	NA	A/A	A/A	A/T	A/A	NA	NA	NA	A/A	A/A	NA	A/T	A/T	A/T	NA	A/T	A/A	NA	NA	T/T	T/T	A/T	A/T	A/A	NA	A/A	A/T	A/A	A/T	A/T	A/A	A/A	A/T
ST4.03ch02pos45929313.1	2	45929313	A/A	NA	NA	A/C	A/A	C/C	A/A	A/C	A/C	A/A	A/C	A/A	A/A	C/C	A/A	A/A	A/A	A/C	A/A	A/A	NA	NA	A/A	A/A	A/A	A/C	NA	A/C	NA	A/C	A/C	NA	NA	C/C	C/C	A/C	A/C	A/A	NA	A/A	A/A	A/A	A/C	A/C	A/A	A/A	A/C
ST4.03ch02pos45929317.1	2	45929317	G/G	NA	NA	G/A	G/G	A/A	G/G	G/A	G/A	G/G	G/A	G/G	G/G	A/A	G/G	G/G	G/G	G/A	G/G	G/G	NA	NA	G/G	G/G	G/G	G/A	NA	G/A	NA	G/A	G/A	NA	NA	A/A	A/A	G/A	G/A	G/G	NA	G/G	G/G	G/G	G/A	G/A	G/G	G/G	G/A
ST4.03ch02pos46128634.1	2	46128634	C/C	NA	C/C	C/C	C/C	C/C	C/C	C/C	C/C	C/C	C/C	C/C	C/G	C/C	C/C	C/G	C/C	C/C	C/C	C/C	NA	C/C	NA	C/G	C/C	C/C	C/C	C/C	C/C	C/C	C/C	C/C	C/C	C/C	C/C	C/C	C/C	C/C	C/G	C/G	C/C	C/C	C/C	C/C	C/C	C/C	C/C
ST4.03ch02pos46128661.1	2	46128661	C/T	NA	C/T	NA	C/C	T/T	NA	C/T	C/T	C/C	C/T	C/C	C/T	T/T	C/C	C/T	C/C	C/T	C/C	C/C	NA	NA	NA	C/T	C/C	NA	T/T	C/T	C/T	C/T	C/T	T/T	NA	T/T	C/T	C/T	NA	C/C	C/T	C/T	C/C	C/C	C/T	C/T	C/C	C/C	C/T
ST4.03ch02pos46216808.1	2	46216808	A/A	NA	A/A	A/T	A/A	T/T	A/A	A/T	A/T	A/A	A/T	A/A	A/A	T/T	A/A	A/A	A/A	A/T	A/A	A/A	NA	NA	A/A	A/A	A/A	A/T	NA	A/T	A/T	A/T	A/T	A/T	NA	T/T	A/T	A/T	A/T	A/A	A/A	A/A	A/A	A/A	NA	A/T	A/A	A/A	A/T
ST4.03ch02pos46266754.1	2	46266754	A/A	NA	A/G	A/G	A/A	G/G	A/A	A/G	A/G	A/A	NA	A/A	A/A	G/G	A/A	A/A	A/A	A/G	A/A	A/A	NA	A/G	NA	A/A	A/A	A/G	A/G	A/G	A/G	A/G	A/G	A/G	NA	A/G	A/A	A/G	A/G	A/A	A/G	A/A	A/A	A/A	A/G	A/G	A/A	A/A	A/G
ST4.03ch02pos46266795.1	2	46266795	G/G	G/G	G/A	G/A	G/G	G/A	G/G	G/A	G/A	G/G	G/A	G/G	G/G	G/A	G/G	G/G	G/G	G/A	G/G	G/G	NA	NA	NA	G/G	G/G	G/A	NA	G/A	NA	NA	G/A	G/A	NA	G/A	G/G	G/A	G/A	G/G	G/A	G/G	G/G	G/G	NA	G/A	G/G	G/G	G/A
ST4.03ch02pos46345104.1	2	46345104	A/A	NA	A/G	A/G	A/A	G/G	A/A	A/G	A/G	A/A	A/G	A/A	A/A	G/G	A/A	A/A	A/A	A/G	A/A	A/A	A/G	NA	NA	A/A	A/A	A/G	A/G	A/G	A/G	A/G	A/G	A/G	A/G	G/G	A/G	A/G	A/G	A/A	A/G	A/A	A/A	A/A	A/G	A/G	A/A	A/A	A/G
ST4.03ch02pos46345128.1	2	46345128	A/A	A/A	A/A	A/A	A/A	A/A	A/A	A/A	A/A	A/A	A/A	A/A	A/A	A/A	A/A	A/A	A/A	A/A	A/A	A/A	A/A	A/A	A/A	A/A	A/A	A/A	A/A	A/A	A/A	A/C	A/A	A/A	NA	A/C	NA	A/A	A/C	A/A	A/C	A/A	A/A	A/A	A/A	A/A	A/A	A/A	A/A
ST4.03ch02pos46345130.1	2	46345130	G/G	G/G	G/G	G/G	G/G	G/G	G/G	G/G	G/G	G/G	G/G	G/G	G/G	G/G	G/G	G/G	G/G	G/G	G/G	G/G	G/G	G/G	G/G	G/G	G/G	G/G	G/G	G/G	G/G	G/C	G/G	G/G	NA	G/C	NA	G/G	G/C	G/G	G/C	G/G	G/G	G/G	G/G	G/G	G/G	G/G	G/G
ST4.03ch02pos46345131.1	2	46345131	C/C	C/C	C/C	C/C	C/C	C/C	C/C	C/C	C/C	C/C	C/C	C/C	C/C	C/C	C/C	C/C	C/C	C/C	C/C	C/C	C/C	C/C	C/C	C/C	C/C	C/C	C/C	C/C	C/C	C/A	C/C	C/C	NA	C/A	NA	C/C	C/A	C/C	C/A	C/C	C/C	C/C	C/C	C/C	C/C	C/C	C/C
ST4.03ch02pos46345132.1	2	46345132	G/G	G/G	G/G	G/G	G/G	G/G	G/G	G/G	G/G	G/G	G/G	G/G	G/G	G/G	G/G	G/G	G/G	G/G	G/G	G/G	G/G	G/G	G/G	G/G	G/G	G/G	G/G	G/G	G/G	G/A	G/G	G/G	NA	G/A	NA	G/G	G/A	G/G	G/A	G/G	G/G	G/G	G/G	G/G	G/G	G/G	G/G
ST4.03ch02pos46345133.1	2	46345133	C/C	C/C	C/C	C/C	C/C	C/C	C/C	C/C	C/C	C/C	C/C	C/C	C/C	C/C	C/C	C/C	C/C	C/C	C/C	C/C	C/C	C/C	C/C	C/C	C/C	C/C	C/C	C/C	C/C	C/T	C/C	C/C	NA	C/T	NA	C/C	C/T	C/C	C/T	C/C	C/C	C/C	C/C	C/C	C/C	C/C	C/C
ST4.03ch02pos46345149.1	2	46345149	G/G	G/G	G/G	G/G	G/G	G/G	G/G	G/G	G/G	G/G	G/G	G/G	G/G	G/G	G/G	G/G	G/G	G/G	G/G	G/G	G/G	G/G	G/G	G/G	G/G	G/G	G/G	G/G	NA	G/G	G/G	G/G	G/A	G/A	G/A	G/G	G/G	G/G	G/A	G/G	G/G	G/G	G/G	G/G	G/G	G/G	G/G
ST4.03ch02pos46345152.1	2	46345152	T/T	T/T	T/T	T/T	T/T	T/T	T/T	T/T	T/T	T/T	T/T	T/T	T/T	T/T	T/T	T/T	T/T	T/T	T/T	T/T	T/T	T/T	T/T	T/T	T/T	T/T	T/T	T/T	NA	T/C	T/T	T/T	T/C	T/C	T/C	T/T	T/C	T/T	T/C	T/T	T/T	T/T	T/T	T/T	T/T	T/T	T/T
ST4.03ch02pos46494203.1	2	46494203	C/C	C/C	C/C	C/C	C/C	C/T	C/C	C/C	C/C	C/C	C/C	C/C	C/C	C/T	C/C	C/C	C/C	C/C	C/C	C/C	C/C	C/C	C/C	C/C	C/C	C/T	C/T	C/C	C/T	C/T	C/T	C/C	C/T	C/T	C/T	C/T	C/C	C/C	C/C	C/C	C/C	C/C	C/C	C/C	C/C	C/C	C/C
ST4.03ch02pos46494260.1	2	46494260	G/G	G/G	G/G	G/G	G/G	G/A	G/G	G/G	G/G	G/G	G/G	G/G	G/G	G/A	G/G	G/G	G/G	G/G	G/G	G/G	G/G	G/G	G/G	G/G	G/G	G/A	G/A	G/G	G/G	G/A	G/A	G/G	G/G	G/G	G/G	G/A	G/G	G/G	G/G	G/G	G/G	G/G	G/G	G/G	G/G	G/G	G/G
ST4.03ch02pos46779015.1	2	46779015	G/G	NA	G/A	G/G	G/G	NA	G/G	G/G	G/G	G/G	G/G	G/G	G/G	G/G	G/G	G/G	G/G	G/A	G/G	G/G	G/G	G/G	G/G	G/G	G/G	G/G	G/G	G/G	NA	G/A	G/G	G/G	G/A	G/A	G/A	G/A	G/A	G/G	G/G	G/G	G/G	G/G	G/A	G/G	G/G	G/G	G/G
ST4.03ch02pos46779045.1	2	46779045	A/A	NA	A/G	A/A	A/A	NA	A/A	A/A	A/A	A/A	A/A	A/A	A/A	A/A	A/A	A/A	A/A	A/G	A/A	A/A	A/A	A/A	A/A	A/A	A/A	A/A	A/A	A/A	A/A	A/G	A/A	A/A	A/A	A/A	A/A	A/G	A/G	A/A	A/A	A/A	A/A	A/A	A/G	A/A	A/A	A/A	A/A
ST4.03ch02pos46799631.1	2	46799631	A/A	A/A	A/A	A/A	A/A	A/A	A/A	A/A	A/A	A/A	A/A	A/A	A/A	A/A	A/A	A/A	A/A	A/A	A/A	A/A	A/A	A/A	A/A	A/A	A/A	A/A	A/A	A/A	A/A	A/A	A/A	A/A	A/A	A/A	A/A	A/A	A/A	A/A	A/A	A/A	A/A	A/A	A/A	A/A	A/A	A/A	A/A
ST4.03ch02pos46914868.1	2	46914868	A/T	A/A	A/A	NA	A/A	A/T	A/A	A/A	A/A	A/A	NA	A/A	A/A	A/T	A/A	A/A	A/A	A/A	A/A	A/A	A/T	A/A	A/A	A/A	A/A	A/T	A/A	A/A	A/A	A/A	A/T	NA	A/A	A/A	A/A	A/T	A/T	A/A	A/A	A/A	A/A	A/A	A/A	A/A	A/A	A/A	A/A
ST4.03ch02pos46965616.1	2	46965616	C/A	C/A	C/A	C/C	C/C	C/C	C/A	C/C	C/C	C/C	C/C	C/C	C/A	C/C	C/C	C/A	C/C	C/A	C/C	C/C	C/A	C/A	C/A	C/A	C/A	C/A	C/A	C/C	C/A	C/A	C/C	C/A	C/A	C/C	C/C	C/A	C/A	C/C	C/A	C/A	C/A	C/C	C/A	C/C	C/C	C/C	C/C
ST4.03ch02pos46965675.1	2	46965675	C/C	C/C	C/C	C/C	C/C	C/C	C/C	C/C	C/C	C/C	C/C	C/C	C/C	C/C	C/C	C/C	C/C	C/C	C/C	C/C	C/C	C/C	C/C	C/C	C/C	C/C	C/C	C/C	C/C	C/C	C/C	C/C	C/C	C/C	C/C	C/C	C/C	C/C	C/C	C/C	C/C	C/C	C/C	C/C	C/C	C/C	C/C
ST4.03ch02pos47009789.1	2	47009789	T/T	T/T	T/T	T/T	T/C	T/T	T/T	T/T	T/C	T/C	T/T	T/C	T/T	T/T	T/T	T/T	T/T	T/T	T/T	T/T	T/T	T/C	T/T	T/T	T/T	T/T	T/T	T/T	T/T	T/T	T/C	T/T	T/T	T/T	T/T	T/T	T/T	T/C	T/T	T/T	T/T	T/C	T/T	T/C	T/C	T/T	T/C
ST4.03ch02pos47013837.1	2	47013837	A/A	A/A	A/A	A/A	A/G	A/A	A/A	A/A	A/G	A/G	A/A	A/G	A/A	A/A	A/A	A/A	A/A	A/A	A/A	A/A	A/A	A/G	A/A	A/A	A/A	A/A	A/A	A/A	A/A	A/A	A/G	A/A	A/A	A/A	A/A	A/A	A/A	A/G	A/A	A/A	A/A	A/G	A/A	A/G	A/G	A/A	A/G
ST4.03ch02pos47013856.1	2	47013856	T/T	T/T	T/T	T/T	T/C	T/T	T/T	T/T	T/C	T/C	T/T	T/C	T/T	T/T	T/T	T/T	T/T	T/T	T/T	T/T	T/T	T/C	T/T	T/T	T/T	T/T	T/T	T/T	T/T	T/T	T/C	T/T	T/T	T/T	T/T	T/T	T/T	T/C	T/T	T/T	T/T	T/C	T/T	T/C	T/C	T/T	T/C
ST4.03ch02pos47043262.1	2	47043262	G/G	G/G	G/G	G/G	G/A	G/G	G/G	G/G	NA	G/A	G/G	G/A	G/G	G/G	NA	G/G	G/G	G/G	G/G	G/G	NA	NA	NA	G/G	G/G	NA	NA	G/G	G/G	G/G	G/A	G/G	NA	G/G	G/G	G/G	G/G	G/A	NA	G/G	G/G	G/A	G/G	G/A	G/A	G/G	G/A
ST4.03ch02pos47087809.1	2	47087809	A/A	A/A	A/A	A/A	A/G	A/A	A/A	A/A	A/G	A/G	A/A	A/G	A/A	A/A	A/A	A/A	A/A	A/A	A/A	A/A	A/A	A/G	A/A	A/A	A/A	A/A	A/A	A/A	A/A	A/G	A/G	A/A	A/G	A/G	A/G	A/A	A/G	A/G	NA	A/A	A/A	A/G	A/A	A/G	A/G	A/A	A/G
ST4.03ch02pos47088782.1	2	47088782	NA	NA	C/C	C/C	NA	C/C	NA	NA	C/T	NA	C/C	C/T	NA	C/C	C/C	C/C	C/C	C/C	C/C	C/C	NA	T/T	NA	C/C	C/C	C/C	C/C	C/C	C/C	C/C	C/T	C/C	NA	NA	C/C	C/C	C/C	C/T	C/C	C/C	C/C	C/T	C/C	NA	C/T	C/C	NA
ST4.03ch02pos47088802.1	2	47088802	NA	NA	T/T	T/T	NA	T/T	NA	NA	T/A	NA	T/T	T/A	NA	T/T	T/T	T/T	T/T	T/T	T/T	T/T	NA	A/A	NA	T/T	T/T	T/T	T/T	T/T	T/T	T/T	T/A	T/T	NA	NA	T/T	T/T	T/T	T/A	T/T	T/T	T/T	T/A	T/T	NA	T/A	T/T	NA
ST4.03ch02pos47220637.1	2	47220637	G/G	G/G	G/G	G/G	G/G	G/G	G/G	G/G	G/G	G/G	G/G	G/G	G/G	G/G	G/G	G/G	G/G	G/G	G/G	G/G	G/G	G/G	G/G	G/G	G/G	G/G	G/G	G/G	G/G	G/G	G/G	G/G	G/G	G/G	G/G	G/G	G/G	G/G	G/A	G/G	G/G	G/G	G/G	G/G	G/G	G/G	G/G
ST4.03ch02pos47220646.1	2	47220646	A/A	A/A	A/A	A/A	A/A	A/A	A/A	A/A	A/A	A/A	A/A	A/A	A/A	A/A	A/A	A/A	A/A	A/A	A/A	A/A	A/A	A/A	A/A	A/A	A/A	A/A	A/A	A/A	A/A	A/G	A/A	A/A	A/G	A/G	A/G	A/A	A/G	A/A	A/G	A/A	A/A	A/A	A/A	A/A	A/A	A/A	A/A
ST4.03ch02pos47528786.1	2	47528786	T/T	T/G	T/G	T/G	T/T	T/G	T/G	T/T	T/T	T/T	T/G	T/T	T/T	T/G	T/T	T/T	T/T	T/G	T/T	T/T	T/T	T/T	T/T	T/T	T/T	T/G	T/G	T/T	T/T	T/G	T/G	T/T	T/G	T/G	T/G	NA	NA	T/T	T/T	T/T	T/T	T/T	T/G	T/T	T/T	T/T	T/T
ST4.03ch02pos47545897.1	2	47545897	A/A	A/A	A/A	A/A	A/A	A/A	A/A	A/A	A/A	A/A	A/A	A/A	A/A	A/A	A/A	A/A	A/A	A/A	A/A	A/A	NA	NA	A/A	A/A	A/C	A/A	A/A	A/A	A/C	A/C	A/A	A/C	A/A	A/A	A/A	A/C	A/C	A/A	A/A	A/A	A/C	A/A	A/A	A/A	A/A	A/A	A/A
ST4.03ch02pos47579906.1	2	47579906	C/C	C/C	C/T	C/C	C/T	C/C	C/C	C/C	C/T	C/T	C/C	C/T	C/C	C/C	C/C	C/C	T/T	C/T	C/C	C/C	C/C	C/T	C/C	C/C	C/C	C/C	C/C	C/C	C/C	C/T	C/T	C/C	C/T	C/C	C/C	C/C	NA	C/T	C/T	C/C	C/C	C/T	C/T	C/T	C/T	C/C	C/T
ST4.03ch02pos47579915.1	2	47579915	A/C	A/C	A/A	A/A	A/A	A/A	A/A	A/A	A/A	A/A	A/A	A/A	A/C	A/A	A/A	A/C	A/A	A/A	NA	A/A	A/C	NA	A/C	A/C	A/C	A/A	A/A	A/A	A/C	NA	A/A	A/C	A/A	A/A	A/A	A/C	A/C	A/A	NA	A/C	A/C	A/A	A/A	A/A	A/A	A/A	A/A
ST4.03ch02pos47579936.1	2	47579936	C/G	C/G	C/C	C/C	C/C	C/C	C/C	C/C	C/C	C/C	C/C	C/C	C/G	C/C	C/C	C/G	C/C	C/C	C/C	C/C	C/G	NA	C/G	C/G	C/G	C/C	C/C	C/C	C/G	C/G	C/C	C/G	C/C	C/C	C/C	C/G	C/G	C/C	C/C	C/G	C/G	C/C	C/C	C/C	C/C	C/C	C/C
ST4.03ch02pos47579963.1	2	47579963	G/G	G/G	G/A	G/G	G/A	G/G	G/G	G/G	G/A	G/A	G/G	G/A	G/G	G/G	G/G	G/G	A/A	G/A	G/G	G/G	G/G	G/A	G/G	G/G	G/G	G/G	G/G	G/G	G/G	G/A	G/A	G/G	G/A	G/G	G/G	G/G	NA	G/A	G/A	G/G	G/G	G/A	G/A	G/A	G/A	G/G	G/A
ST4.03ch02pos47656824.1	2	47656824	C/G	C/C	C/C	C/C	C/G	C/C	C/C	C/C	C/G	C/G	C/C	NA	C/G	C/C	C/C	C/G	C/C	C/C	C/C	C/C	NA	NA	C/G	C/G	C/G	C/C	C/C	C/C	C/C	C/G	C/G	C/G	NA	C/C	C/C	C/G	C/G	C/G	C/C	C/G	C/G	C/G	C/C	C/G	C/G	C/C	C/G
ST4.03ch02pos47656841.1	2	47656841	A/T	A/A	A/A	A/A	A/T	A/A	A/A	A/A	A/T	A/T	A/A	A/T	A/T	A/A	A/A	A/T	A/A	A/A	A/A	A/A	NA	NA	A/T	A/T	A/T	A/A	A/A	A/A	A/A	A/T	A/T	A/T	NA	A/A	A/A	A/T	A/T	A/T	A/A	A/T	A/T	A/T	A/A	A/T	A/T	A/A	A/T
ST4.03ch02pos47656844.1	2	47656844	G/G	G/G	G/G	G/G	G/G	G/G	G/G	G/G	G/G	G/G	G/G	G/G	G/A	G/G	G/G	G/A	G/G	G/G	G/G	G/G	NA	NA	G/A	G/A	G/A	G/G	G/G	G/G	G/G	G/G	G/G	G/G	G/G	G/G	G/G	G/G	G/G	G/G	G/G	G/A	G/A	G/G	G/G	G/G	G/G	G/G	G/G
ST4.03ch02pos47656858.1	2	47656858	C/C	C/C	C/C	C/C	C/C	C/C	C/C	C/C	C/C	C/C	C/C	C/C	C/T	C/C	C/C	NA	C/C	C/C	C/C	C/C	NA	NA	NA	C/T	C/T	C/C	C/C	C/C	C/C	C/C	C/C	C/C	C/C	C/C	C/C	C/C	C/C	C/C	C/C	C/T	C/T	C/C	C/C	C/C	C/C	C/C	C/C
ST4.03ch02pos47656861.1	2	47656861	C/G	C/C	C/C	C/C	C/G	C/C	C/C	C/C	C/G	C/G	C/C	C/G	C/C	C/C	C/C	C/C	C/C	C/C	C/C	C/C	NA	NA	C/C	C/C	C/C	C/C	C/C	C/C	C/C	C/G	C/G	C/G	C/C	C/C	C/C	C/G	C/G	C/G	C/C	C/C	C/C	C/G	C/C	C/G	C/G	C/C	C/G
ST4.03ch02pos47667258.1	2	47667258	T/A	NA	T/T	T/T	T/A	T/T	T/T	T/T	T/A	T/A	T/T	T/A	T/T	T/T	T/T	T/T	T/T	T/T	T/T	T/T	A/A	T/A	T/T	T/T	T/A	T/T	T/T	T/T	NA	T/A	T/A	NA	T/A	T/A	T/A	T/A	T/A	T/A	T/A	T/T	T/A	T/A	T/T	T/A	T/A	T/T	T/A
ST4.03ch02pos47681671.1	2	47681671	A/T	A/A	A/A	A/A	A/T	A/A	A/A	A/A	A/T	A/T	A/A	A/T	A/A	A/A	A/A	NA	A/A	A/A	A/A	A/A	NA	NA	A/A	A/A	A/A	A/A	A/A	A/A	A/T	A/T	A/T	A/T	A/T	A/T	A/T	A/T	A/T	A/T	A/T	A/A	A/A	A/T	A/A	A/T	A/T	A/A	A/T
ST4.03ch02pos48101511.1	2	48101511	G/G	G/G	G/G	G/G	G/G	G/G	G/G	G/G	G/G	G/G	G/G	G/G	A/G	G/G	G/G	A/G	G/G	G/G	A/G	G/G	G/G	G/G	A/G	A/G	A/G	G/G	G/G	G/G	G/G	NA	G/G	G/G	G/G	G/G	G/G	G/G	G/G	G/G	G/G	A/G	A/G	G/G	G/G	G/G	G/G	G/G	G/G
ST4.03ch02pos48102041.1	2	48102041	G/G	G/G	G/G	G/G	G/G	G/G	G/G	G/G	G/G	NA	G/G	G/G	A/G	G/G	G/G	NA	G/G	G/G	A/G	G/G	G/G	G/G	NA	NA	A/G	G/G	G/G	G/G	G/G	NA	G/G	G/G	G/G	G/G	G/G	G/G	G/G	G/G	G/G	A/G	A/G	G/G	G/G	G/G	G/G	G/G	G/G
ST4.03ch02pos48132876.1	2	48132876	A/A	A/G	A/G	A/G	A/A	A/G	A/A	A/A	A/A	A/A	A/G	A/A	A/A	A/G	A/A	A/A	A/G	A/G	A/A	A/A	A/A	A/A	A/A	A/A	A/A	A/G	A/A	A/A	A/A	A/G	A/G	A/A	A/G	A/A	A/A	A/G	A/A	A/A	G/G	A/A	A/A	A/A	A/G	A/A	A/A	A/A	A/A
ST4.03ch02pos48170941.1	2	48170941	A/A	T/A	T/T	T/T	A/A	T/T	A/A	T/A	T/A	A/A	T/T	A/A	T/A	T/T	A/A	T/A	T/A	T/T	T/A	A/A	NA	NA	T/A	T/A	A/A	NA	T/A	T/A	T/A	T/A	T/A	T/A	T/A	T/T	T/A	T/A	T/A	A/A	T/T	T/T	NA	A/A	T/T	T/A	A/A	A/A	T/A
ST4.03ch02pos48184202.1	2	48184202	G/G	A/G	A/A	A/A	G/G	A/A	G/G	A/G	A/G	G/G	A/A	G/G	A/G	A/A	G/G	A/G	A/G	A/A	A/G	G/G	A/G	A/G	A/G	A/G	G/G	A/G	A/G	A/G	A/G	A/G	A/G	A/G	A/G	A/G	G/G	A/G	A/G	G/G	A/A	A/A	G/G	G/G	A/A	A/G	G/G	G/G	A/G
ST4.03ch02pos48194253.1	2	48194253	G/G	G/G	NA	A/A	G/G	A/A	G/G	NA	NA	G/G	A/A	G/G	NA	A/A	G/G	NA	NA	NA	NA	G/G	NA	G/G	G/G	NA	A/G	NA	NA	G/G	A/G	A/G	A/G	G/G	G/G	A/A	A/G	A/G	NA	G/G	NA	A/A	A/G	G/G	A/A	A/G	G/G	G/G	A/G
ST4.03ch02pos48234889.1	2	48234889	T/T	C/T	C/C	C/C	T/T	C/C	T/T	C/T	C/T	T/T	C/C	T/T	C/T	C/C	T/T	C/T	C/T	C/C	C/T	T/T	C/T	C/T	C/T	C/T	C/T	C/T	C/T	C/T	C/T	C/T	C/T	C/T	C/T	C/C	T/T	C/T	C/T	T/T	C/C	C/C	C/T	T/T	C/C	C/T	T/T	T/T	C/T
ST4.03ch02pos48234892.1	2	48234892	C/C	C/T	C/T	C/T	C/C	C/T	C/C	C/C	C/C	C/C	C/T	C/C	C/C	C/T	C/C	C/C	C/T	C/T	C/C	C/C	C/C	C/C	C/C	C/C	C/C	C/T	C/C	C/C	C/C	C/T	C/T	C/C	C/T	C/C	C/C	C/C	C/C	C/C	T/T	C/C	C/C	C/C	C/T	C/C	C/C	C/C	C/C
ST4.03ch02pos48235003.1	2	48235003	G/G	A/G	A/A	A/A	G/G	A/A	G/G	A/G	A/G	G/G	A/A	G/G	A/G	A/A	G/G	A/G	A/G	A/A	A/G	G/G	A/G	G/G	A/G	A/G	G/G	NA	A/G	A/G	A/G	A/G	A/G	A/G	A/G	A/G	G/G	A/G	A/G	G/G	A/A	A/A	G/G	G/G	A/A	A/G	G/G	G/G	A/G
ST4.03ch02pos48263962.1	2	48263962	T/T	C/T	C/C	C/C	T/T	C/C	T/T	T/T	T/T	T/T	C/C	T/T	C/T	C/C	T/T	C/T	T/T	C/C	C/T	T/T	T/T	T/T	C/T	C/T	T/T	C/T	T/T	T/T	T/T	C/T	C/T	T/T	C/T	NA	T/T	T/T	T/T	T/T	C/C	C/C	T/T	T/T	C/C	T/T	T/T	T/T	T/T
ST4.03ch02pos48502900.1	2	48502900	C/C	C/T	C/T	C/T	C/C	C/T	C/C	C/C	C/C	C/C	C/T	C/C	C/C	C/T	C/C	C/C	C/C	C/T	C/C	C/C	C/C	C/C	C/C	C/C	C/T	C/T	C/C	C/C	C/C	C/C	C/T	C/C	C/T	C/C	C/C	C/C	C/C	C/C	T/T	C/C	C/T	C/C	C/T	C/C	C/C	C/C	C/C
ST4.03ch02pos48517066.1	2	48517066	T/T	T/T	T/T	T/T	T/T	NA	T/T	T/T	T/T	T/T	T/T	T/T	T/T	T/T	NA	T/T	T/T	T/T	T/C	T/C	T/T	T/T	T/T	T/T	T/C	T/T	T/T	T/C	T/T	T/C	T/T	T/T	NA	T/T	T/T	T/T	T/T	T/C	T/T	T/T	T/C	T/T	T/T	NA	T/T	T/C	NA
ST4.03ch02pos48517079.1	2	48517079	T/T	G/T	G/G	G/T	G/T	G/T	G/T	G/T	G/T	G/G	G/T	G/G	G/G	G/T	G/T	G/G	G/G	G/G	G/G	G/G	G/T	NA	G/G	G/G	G/G	G/T	T/T	G/G	G/T	G/T	NA	G/T	G/G	G/G	G/G	G/T	G/T	G/T	G/G	G/G	G/G	G/T	G/G	G/G	G/G	G/T	G/T
ST4.03ch02pos48517080.1	2	48517080	T/T	G/T	G/G	G/T	G/T	G/T	G/T	G/T	G/T	G/G	G/T	G/G	G/G	G/T	G/T	G/G	G/G	G/G	G/G	G/G	G/T	NA	G/G	G/G	G/G	G/T	T/T	G/G	G/T	G/T	NA	G/T	G/G	G/G	G/G	G/T	G/T	G/T	G/G	G/G	G/G	G/T	G/G	G/G	G/G	G/T	G/T
ST4.03ch02pos48517094.1	2	48517094	T/T	T/T	T/T	NA	NA	C/T	C/T	NA	T/T	T/T	T/T	T/T	T/T	T/T	NA	T/T	T/T	T/T	C/T	C/T	T/T	T/T	T/T	T/T	C/T	T/T	T/T	C/T	T/T	C/T	NA	T/T	C/T	T/T	T/T	T/T	T/T	C/T	T/T	T/T	C/T	T/T	T/T	C/T	T/T	C/T	NA
ST4.03ch02pos48517117.1	2	48517117	A/A	A/T	T/T	A/T	A/T	A/T	A/T	A/T	A/T	T/T	A/T	T/T	T/T	A/T	A/T	T/T	T/T	T/T	A/T	A/T	A/T	NA	T/T	T/T	A/T	A/T	A/A	A/T	A/T	A/T	A/A	A/T	A/T	T/T	T/T	A/T	A/T	A/T	T/T	T/T	A/T	A/T	T/T	A/T	NA	A/T	A/T
ST4.03ch03pos270167.1	3	270167	C/C	C/C	C/C	C/C	C/C	C/C	C/C	C/C	C/C	C/C	C/C	C/C	C/C	C/C	C/C	C/C	C/C	C/C	C/C	C/C	C/C	C/C	C/C	C/C	C/C	C/C	C/C	C/C	C/C	C/C	C/C	C/C	C/C	C/C	C/C	C/C	C/C	C/C	C/C	C/C	C/C	C/C	C/C	C/C	C/C	C/C	C/C
ST4.03ch03pos289873.1	3	289873	A/A	A/A	A/A	A/A	A/A	A/A	A/A	A/A	A/A	A/A	A/A	A/A	A/A	A/A	NA	A/A	A/A	A/A	A/G	A/A	NA	NA	A/A	A/A	A/A	A/A	A/A	A/A	A/G	NA	A/A	A/G	A/A	A/A	A/A	A/G	A/G	A/A	A/A	A/A	A/A	A/A	A/A	A/A	A/A	A/A	A/A
ST4.03ch03pos289892.1	3	289892	C/T	NA	T/T	T/T	T/T	T/T	T/T	T/T	T/T	T/T	T/T	T/T	T/T	T/T	NA	T/T	T/T	T/T	C/T	T/T	C/C	NA	T/T	T/T	T/T	T/T	T/T	T/T	C/T	C/T	C/T	C/C	C/T	T/T	T/T	C/T	NA	T/T	T/T	T/T	T/T	T/T	T/T	T/T	T/T	T/T	T/T
ST4.03ch03pos289893.1	3	289893	T/T	T/T	T/T	T/T	T/T	T/T	T/T	T/T	T/T	T/T	T/T	T/T	T/T	T/T	NA	T/T	T/T	T/T	T/C	T/T	NA	NA	T/T	T/T	T/T	T/T	T/T	T/T	T/C	NA	T/T	T/C	T/C	T/T	T/T	T/C	T/C	T/T	T/T	T/T	T/T	T/T	T/T	T/T	T/T	T/T	T/T
ST4.03ch03pos289895.1	3	289895	G/G	G/G	G/G	G/G	G/G	G/G	G/G	G/G	G/G	G/G	G/G	G/G	G/G	G/G	NA	G/G	G/G	G/G	C/G	G/G	NA	NA	G/G	G/G	G/G	G/G	G/G	G/G	C/G	NA	G/G	C/G	C/G	G/G	G/G	C/G	C/G	G/G	G/G	G/G	G/G	G/G	G/G	G/G	G/G	G/G	G/G
ST4.03ch03pos349592.1	3	349592	NA	C/C	C/C	C/C	C/C	C/C	C/C	C/C	C/C	C/C	C/C	C/C	C/C	C/C	C/C	C/C	C/C	C/C	C/C	C/C	NA	C/C	C/C	C/C	C/C	C/C	C/C	C/C	C/C	T/C	C/C	NA	T/C	C/C	C/C	C/C	T/C	C/C	C/C	C/C	C/C	C/C	C/C	C/C	C/C	C/C	C/C
ST4.03ch03pos536288.1	3	536288	G/G	G/G	G/G	G/G	G/G	G/G	G/G	G/G	G/G	G/G	G/G	G/G	G/G	G/G	G/G	G/G	G/G	G/G	G/G	G/G	A/G	A/G	G/G	G/G	G/G	G/G	G/G	G/G	A/G	A/G	G/G	A/G	G/G	G/G	G/G	A/G	A/G	G/G	G/G	G/G	G/G	G/G	G/G	G/G	G/G	G/G	G/G
ST4.03ch03pos695796.1	3	695796	C/C	C/C	C/C	C/T	NA	T/T	C/T	T/T	T/T	C/T	C/T	C/T	C/C	T/T	C/T	C/C	C/C	C/C	C/T	C/T	C/C	C/T	C/C	C/C	C/C	C/T	C/T	C/T	C/T	C/T	C/T	C/C	C/T	T/T	C/T	C/T	C/T	T/T	C/C	C/C	C/C	T/T	C/C	C/T	C/T	C/T	T/T
ST4.03ch03pos695810.1	3	695810	C/C	C/C	C/C	C/C	C/C	C/C	C/C	C/C	C/C	C/C	C/C	C/C	C/C	C/C	C/C	C/C	C/C	C/C	C/C	C/C	T/C	NA	C/C	C/C	C/C	C/C	C/C	C/C	NA	C/C	C/C	T/C	C/C	C/C	C/C	T/C	T/C	C/C	C/C	C/C	C/C	C/C	C/C	C/C	C/C	C/C	C/C
ST4.03ch03pos695813.1	3	695813	G/G	G/G	G/G	G/A	G/A	A/A	G/A	A/A	A/A	G/A	G/A	G/A	G/G	A/A	G/A	G/G	G/G	G/G	G/A	G/A	G/G	G/A	G/G	G/G	G/G	G/A	G/A	G/A	G/A	G/A	G/A	G/G	G/A	A/A	G/A	G/A	G/A	A/A	G/G	G/G	G/G	A/A	G/G	G/A	G/A	G/A	A/A
ST4.03ch03pos695848.1	3	695848	A/A	A/A	A/A	A/G	NA	G/G	A/G	G/G	G/G	A/G	A/G	A/G	A/A	G/G	A/G	A/A	A/A	A/A	A/G	A/G	A/A	A/G	A/A	A/A	A/A	A/G	A/G	A/G	A/G	A/G	A/G	A/A	A/G	G/G	A/G	A/G	A/G	G/G	A/A	A/A	A/A	G/G	A/A	A/G	A/G	A/G	G/G
ST4.03ch03pos695849.1	3	695849	C/C	C/G	C/G	C/G	C/C	C/C	C/C	C/C	C/C	C/G	C/G	C/G	C/C	C/C	C/C	C/C	G/G	C/G	C/G	C/C	C/G	C/G	C/C	C/C	C/G	C/G	C/C	C/C	C/G	C/G	C/C	C/G	C/G	C/C	C/G	C/G	C/G	C/C	G/G	C/C	C/G	C/C	C/G	C/C	C/G	C/C	C/C
ST4.03ch03pos695865.1	3	695865	C/C	C/C	C/C	C/T	NA	T/T	C/T	T/T	T/T	C/T	C/T	C/T	C/C	T/T	C/T	C/C	C/C	C/C	C/T	C/T	C/C	C/T	C/C	C/C	C/C	C/T	C/T	C/T	C/T	C/T	C/T	C/C	C/T	T/T	C/T	C/T	C/T	T/T	C/C	C/C	C/C	T/T	C/C	C/T	C/T	C/T	T/T
ST4.03ch03pos695901.1	3	695901	A/C	NA	A/C	A/A	A/A	A/A	A/C	A/A	A/A	A/A	A/A	A/A	C/C	A/A	NA	C/C	A/A	A/C	A/A	A/A	A/A	A/A	NA	C/C	A/C	A/A	A/A	A/C	A/A	A/A	A/A	A/A	A/A	A/A	A/A	A/A	A/A	A/A	A/A	A/A	A/C	A/A	A/C	A/C	A/A	A/C	A/A
ST4.03ch03pos695964.1	3	695964	C/C	C/C	NA	C/C	C/C	C/C	C/C	C/C	C/C	C/C	C/C	C/C	G/C	C/C	C/C	NA	C/C	C/C	C/C	C/C	C/C	C/C	NA	G/C	C/C	C/C	C/C	C/C	C/C	C/C	C/C	C/C	C/C	C/C	C/C	C/C	C/C	C/C	C/C	C/C	C/C	C/C	C/C	C/C	C/C	C/C	C/C
ST4.03ch03pos695965.1	3	695965	A/C	A/C	NA	A/C	C/C	C/C	A/C	C/C	C/C	A/C	A/C	A/C	A/C	C/C	NA	NA	A/C	A/C	A/C	A/C	A/A	A/C	NA	A/C	A/C	A/C	A/C	NA	A/C	A/C	A/C	A/C	A/C	C/C	A/C	A/C	A/C	C/C	A/C	A/A	A/A	C/C	A/C	A/C	A/C	A/C	C/C
ST4.03ch03pos706473.1	3	706473	A/A	A/T	A/T	A/T	NA	T/T	A/T	T/T	T/T	T/T	A/T	T/T	A/A	T/T	A/T	A/A	A/T	A/T	T/T	A/T	T/T	T/T	A/A	A/A	A/T	A/T	A/T	A/T	A/T	A/T	A/T	T/T	T/T	T/T	T/T	A/T	A/T	T/T	A/T	A/A	A/T	T/T	A/T	A/T	NA	A/T	T/T
ST4.03ch03pos740737.1	3	740737	G/G	G/A	G/A	G/A	G/A	A/A	G/A	A/A	A/A	A/A	G/A	A/A	G/G	A/A	G/A	G/G	G/A	G/A	G/A	G/A	G/G	NA	G/G	G/G	G/G	G/A	G/A	G/A	G/A	G/A	G/A	G/G	G/A	A/A	A/A	G/A	G/A	A/A	G/G	G/G	G/G	A/A	G/A	G/A	G/A	G/A	A/A
ST4.03ch03pos740805.1	3	740805	C/C	C/C	C/C	C/C	C/C	C/C	C/C	C/C	C/C	C/C	C/C	C/C	C/C	C/C	C/C	C/C	C/C	C/C	C/C	C/C	C/C	C/C	C/C	C/C	C/C	C/C	C/C	C/C	C/C	C/C	C/C	C/C	C/C	C/C	C/C	C/C	C/C	C/C	C/C	C/C	C/C	C/C	C/C	C/C	C/C	C/C	C/C
ST4.03ch03pos746957.1	3	746957	G/G	NA	A/G	A/G	A/G	A/G	A/G	NA	A/G	A/A	A/G	NA	G/G	A/G	A/G	G/G	A/G	A/G	A/G	A/G	A/G	A/A	A/G	G/G	G/G	A/G	A/G	A/G	A/G	A/G	A/G	A/G	A/G	NA	A/G	A/G	A/G	A/G	NA	G/G	G/G	A/G	A/G	A/G	A/A	A/G	NA
ST4.03ch03pos746960.1	3	746960	A/A	NA	G/A	G/A	G/A	NA	G/A	G/A	G/A	NA	G/A	NA	A/A	G/A	G/A	A/A	G/A	G/A	G/A	G/A	G/A	NA	G/A	NA	A/A	G/A	G/A	G/A	G/A	G/A	G/A	G/A	G/A	G/A	G/A	G/A	G/A	G/A	NA	A/A	A/A	G/A	G/A	G/A	G/G	G/A	G/A
ST4.03ch03pos746963.1	3	746963	G/G	NA	T/G	T/G	T/G	NA	T/G	NA	T/G	T/T	T/G	NA	G/G	T/G	T/G	G/G	T/G	T/G	T/G	T/G	T/G	T/T	T/G	NA	G/G	T/G	T/G	T/G	T/G	T/G	T/G	T/G	T/G	T/G	T/G	T/G	T/G	T/G	NA	G/G	G/G	T/G	T/G	T/G	T/T	T/G	NA
ST4.03ch03pos746969.1	3	746969	T/T	NA	A/T	A/T	A/T	NA	A/T	NA	A/T	A/A	A/T	NA	T/T	A/T	A/T	T/T	A/T	A/T	A/T	A/T	A/T	A/A	A/T	NA	T/T	A/T	A/T	A/T	A/T	A/T	A/T	A/T	A/T	A/T	A/T	A/T	A/T	A/T	NA	T/T	T/T	A/T	A/T	A/T	A/A	A/T	A/T
ST4.03ch03pos746972.1	3	746972	A/A	NA	G/A	G/A	G/A	NA	G/A	NA	G/A	G/G	G/A	NA	A/A	G/A	G/A	A/A	G/A	G/A	G/A	G/A	G/A	G/G	G/A	NA	A/A	G/A	G/A	G/A	G/A	G/A	G/A	G/A	G/A	G/A	G/A	G/A	G/A	G/A	NA	A/A	A/A	G/A	G/A	G/A	G/G	G/A	G/A
ST4.03ch03pos746975.1	3	746975	T/T	NA	A/T	A/T	A/T	NA	A/T	NA	A/T	A/A	A/T	A/A	T/T	A/T	A/T	T/T	A/T	A/T	A/T	A/T	A/T	NA	A/T	T/T	T/T	A/T	A/T	A/T	A/T	A/T	A/T	A/T	A/T	A/T	A/T	A/T	A/T	A/T	NA	T/T	T/T	A/T	A/T	A/T	A/A	A/T	NA
ST4.03ch03pos746990.1	3	746990	G/G	NA	A/G	A/G	A/A	A/A	A/G	A/A	A/A	A/A	A/A	A/A	G/G	A/G	A/A	G/G	A/G	NA	A/G	NA	A/G	A/A	A/G	G/G	G/G	A/A	NA	NA	A/G	A/G	A/G	A/G	A/G	A/A	NA	A/G	A/G	A/G	NA	G/G	G/G	A/A	A/G	A/G	A/A	NA	A/A
ST4.03ch03pos747000.1	3	747000	C/C	NA	T/C	T/C	T/C	T/T	T/C	NA	NA	T/T	NA	NA	C/C	T/C	T/C	C/C	T/C	T/C	T/C	T/C	T/C	T/T	T/C	NA	C/C	NA	T/C	T/C	T/C	T/C	T/C	T/C	T/C	NA	T/C	T/C	T/C	T/C	NA	C/C	C/C	NA	T/C	T/C	T/T	T/C	NA
ST4.03ch03pos747003.1	3	747003	A/A	NA	G/A	NA	NA	G/G	G/A	NA	G/G	G/G	NA	G/G	A/A	G/A	NA	A/A	G/A	NA	G/A	G/A	G/A	G/G	G/A	A/A	A/A	NA	G/A	G/A	G/A	G/A	G/A	G/A	G/A	G/A	NA	G/A	G/A	NA	NA	A/A	A/A	G/G	G/A	G/A	G/G	NA	G/G
ST4.03ch03pos751384.1	3	751384	T/T	T/T	T/T	T/T	T/T	T/T	T/T	T/C	T/C	T/T	T/T	NA	T/T	NA	T/T	T/T	T/T	T/T	T/T	T/T	T/T	T/T	T/T	T/T	T/T	T/T	T/T	T/T	T/T	T/T	T/C	T/T	T/T	T/T	T/C	T/T	T/T	NA	T/T	T/T	T/T	T/C	T/T	T/T	T/C	T/T	T/C
ST4.03ch03pos751387.1	3	751387	C/T	C/T	C/T	C/T	C/T	NA	C/T	C/T	C/T	C/T	C/T	C/T	C/T	C/T	C/T	C/T	C/T	C/T	C/T	T/T	NA	C/T	C/T	C/T	T/T	C/T	C/T	C/T	C/T	C/T	C/T	C/T	C/T	NA	C/T	C/T	C/T	C/T	T/T	T/T	T/T	C/T	C/T	C/T	C/T	C/T	C/T
ST4.03ch03pos751396.1	3	751396	C/T	C/T	C/T	C/T	C/T	C/T	C/T	C/T	C/T	C/T	C/T	C/T	C/C	C/T	C/T	C/C	C/T	C/T	C/T	C/T	C/C	C/T	C/C	C/C	C/C	C/T	C/T	C/T	C/T	C/T	C/T	C/C	C/T	C/T	C/T	C/T	C/C	C/T	C/C	C/C	C/C	C/T	C/T	C/T	C/T	C/T	C/T
ST4.03ch03pos751439.1	3	751439	T/G	T/G	T/G	T/G	T/G	T/G	T/G	T/G	T/G	T/G	T/G	T/G	T/T	T/G	T/G	T/T	T/G	T/G	T/G	T/G	T/T	T/G	T/T	T/T	T/T	T/G	T/G	T/G	T/G	T/G	T/G	T/T	T/G	T/G	T/G	T/G	NA	T/G	T/T	T/T	T/T	T/G	T/G	T/G	T/G	T/G	T/G
ST4.03ch03pos751441.1	3	751441	T/C	T/C	T/C	T/C	T/C	T/C	T/C	T/C	T/C	T/C	T/C	T/C	T/T	T/C	T/C	T/T	T/C	T/C	T/C	T/C	T/T	T/C	T/T	T/T	T/T	T/C	T/C	T/C	T/C	T/C	T/C	T/T	T/C	T/C	T/C	T/C	T/T	T/C	T/T	T/T	T/T	T/C	T/C	T/C	T/C	T/C	T/C
ST4.03ch03pos751447.1	3	751447	T/C	T/C	T/C	T/C	T/C	T/C	T/C	T/C	T/C	T/C	T/C	T/C	T/T	T/C	T/C	T/T	T/C	T/C	T/C	T/C	T/T	T/C	T/T	T/T	T/T	T/C	T/C	T/C	T/C	T/C	T/C	T/T	T/C	T/C	T/C	T/C	T/T	T/C	T/T	T/T	T/T	T/C	T/C	T/C	T/C	T/C	T/C
ST4.03ch03pos751465.1	3	751465	C/T	C/T	C/T	C/T	C/T	C/T	C/T	C/T	C/T	C/T	C/T	C/T	C/C	C/T	C/T	C/C	C/T	C/T	C/T	C/T	C/C	C/T	C/C	C/C	C/C	C/T	C/T	C/T	C/T	C/T	C/T	C/C	C/T	C/T	C/T	C/T	C/C	C/T	C/C	C/C	C/C	C/T	C/T	C/T	C/T	C/T	C/T
ST4.03ch03pos813703.1	3	813703	T/T	NA	T/C	NA	NA	C/C	T/C	C/C	C/C	C/C	T/C	C/C	T/T	C/C	NA	T/T	T/C	T/C	NA	C/C	NA	C/C	NA	NA	T/T	NA	NA	T/C	T/C	T/C	T/C	NA	NA	C/C	C/C	T/C	T/T	C/C	NA	T/C	T/T	C/C	T/C	T/C	C/C	NA	C/C
ST4.03ch03pos813737.1	3	813737	C/T	NA	C/T	C/C	NA	C/C	C/T	C/C	C/C	C/C	C/C	C/C	NA	C/C	NA	C/T	C/C	C/T	C/C	C/C	NA	C/C	NA	NA	C/T	NA	C/C	C/T	NA	C/T	C/C	NA	NA	C/C	C/C	NA	C/C	C/C	C/C	C/C	C/T	C/C	C/T	C/T	C/C	NA	C/C
ST4.03ch03pos813744.1	3	813744	G/G	NA	G/A	NA	NA	A/A	G/A	A/A	A/A	A/A	G/A	A/A	G/G	A/A	NA	G/G	G/A	G/A	NA	A/A	NA	A/A	NA	NA	G/G	NA	NA	G/A	G/A	G/A	G/A	NA	NA	A/A	A/A	G/A	G/G	A/A	NA	G/A	G/G	A/A	G/A	G/A	A/A	NA	A/A
ST4.03ch03pos829528.1	3	829528	T/G	NA	T/G	T/T	NA	T/T	T/G	T/T	T/T	T/T	T/T	T/T	T/G	T/T	T/G	T/G	T/T	T/G	T/T	T/T	T/T	NA	T/G	T/G	T/G	T/T	T/T	T/G	NA	T/G	T/T	T/G	T/T	T/T	T/T	T/G	T/G	T/T	T/T	T/T	T/G	T/T	T/G	T/G	NA	T/G	T/T
ST4.03ch03pos829535.1	3	829535	C/G	NA	C/G	G/G	G/G	G/G	C/G	G/G	G/G	G/G	G/G	G/G	C/G	G/G	C/G	C/G	G/G	C/G	G/G	G/G	G/G	NA	C/G	C/G	C/G	G/G	G/G	C/G	NA	C/G	G/G	C/G	G/G	G/G	G/G	C/G	C/G	G/G	G/G	G/G	C/G	G/G	C/G	C/G	NA	C/G	G/G
ST4.03ch03pos829578.1	3	829578	A/C	NA	A/C	A/A	NA	A/A	A/C	A/A	A/A	A/A	A/A	A/A	A/C	A/A	A/C	A/C	A/A	A/C	A/A	A/A	A/A	NA	A/C	A/C	A/C	A/A	A/A	A/C	NA	A/C	A/A	A/C	A/A	A/A	A/A	A/C	A/C	A/A	A/A	A/A	A/C	A/A	A/C	A/C	NA	A/C	A/A
ST4.03ch03pos829582.1	3	829582	C/T	NA	C/T	C/C	NA	C/C	C/T	C/C	C/C	C/C	C/C	C/C	C/T	C/C	C/T	NA	C/C	C/T	C/C	C/C	C/C	NA	C/T	C/T	C/T	C/C	C/C	C/T	NA	C/T	C/C	C/T	C/C	C/C	C/C	C/T	C/T	C/C	C/C	C/C	C/T	C/C	C/T	C/T	NA	C/T	C/C
ST4.03ch03pos1718427.1	3	1718427	G/G	G/G	G/G	G/G	G/G	G/G	G/G	G/G	G/G	G/G	G/G	G/G	NA	G/G	G/G	NA	G/G	G/G	G/G	G/G	NA	G/G	G/A	G/G	G/A	G/G	G/G	G/G	G/G	G/G	G/G	G/G	NA	G/G	G/G	G/G	G/A	G/G	NA	NA	G/A	G/G	G/G	G/G	G/G	G/G	G/G
ST4.03ch03pos1729770.1	3	1729770	A/G	NA	A/A	A/A	A/A	A/A	A/A	A/A	A/A	A/A	A/A	A/A	A/A	A/A	A/A	A/A	A/A	A/A	A/A	A/A	NA	A/A	A/A	A/A	A/A	A/A	A/A	A/A	A/A	NA	A/G	NA	A/A	A/A	A/A	A/A	A/A	A/A	A/A	A/A	A/A	A/A	A/A	A/A	A/A	A/A	A/A
ST4.03ch03pos1858643.1	3	1858643	T/T	T/T	T/G	T/T	T/T	T/T	T/T	T/T	T/T	T/T	T/T	T/T	T/T	T/T	T/T	T/T	T/T	T/G	T/G	T/T	T/G	T/G	T/T	T/T	T/T	T/T	T/T	T/T	T/G	T/T	T/T	T/G	T/T	T/T	T/T	T/G	T/G	T/T	T/T	T/T	T/T	T/T	T/G	T/T	T/T	T/T	T/T
ST4.03ch03pos1858644.1	3	1858644	T/A	T/A	T/T	T/T	T/A	T/T	T/A	T/T	T/T	T/T	T/T	T/T	T/A	T/T	T/A	T/A	T/T	T/T	T/A	T/T	T/A	T/A	T/A	T/A	T/A	NA	T/T	T/A	T/A	T/A	T/T	T/A	T/A	T/T	T/T	T/A	T/A	T/T	T/T	T/T	T/A	T/T	T/T	T/A	T/T	T/A	T/T
ST4.03ch03pos1933196.1	3	1933196	A/T	A/T	A/A	A/A	A/A	A/A	A/A	A/A	A/A	A/A	A/A	A/A	A/A	A/A	A/A	A/A	A/A	A/A	A/A	A/A	A/A	A/A	A/A	A/A	A/A	A/A	A/A	A/T	A/T	A/A	A/T	A/A	A/A	A/A	A/A	A/T	A/A	A/A	A/A	A/A	A/A	A/A	A/A	A/A	A/A	A/A	A/A
ST4.03ch03pos1933256.1	3	1933256	G/G	G/G	G/G	G/G	G/G	G/G	G/G	G/G	G/G	G/G	G/G	G/G	G/G	G/G	G/G	G/G	G/G	G/G	G/A	G/G	G/A	G/A	G/G	G/G	G/G	G/G	G/G	G/G	G/A	G/G	G/G	G/A	G/G	G/G	G/G	G/A	G/A	G/G	G/G	G/G	G/G	G/G	G/G	G/G	G/G	G/G	G/G
ST4.03ch03pos1936653.1	3	1936653	G/G	G/G	G/G	G/G	G/G	G/G	G/G	G/G	G/G	G/G	G/G	G/G	G/G	G/G	G/G	G/G	G/G	G/G	G/A	G/G	G/A	G/A	G/G	G/G	G/G	G/G	G/G	G/G	G/A	G/A	G/G	G/A	G/A	G/G	G/G	G/A	G/A	G/G	G/G	G/G	G/G	G/G	G/G	G/G	G/G	G/G	G/G
ST4.03ch03pos1936659.1	3	1936659	T/T	T/T	T/T	T/T	T/T	T/T	T/T	T/T	T/T	T/T	T/T	T/T	T/T	T/T	T/T	T/T	T/T	T/T	T/C	T/T	T/C	T/C	T/T	T/T	T/T	T/T	T/T	T/T	T/C	T/C	T/T	T/C	T/T	T/T	T/T	T/C	T/C	T/T	T/T	T/T	T/T	T/T	T/T	T/T	T/T	T/T	T/T
ST4.03ch03pos1938429.1	3	1938429	G/G	G/G	G/G	G/G	G/G	G/G	G/G	G/G	G/G	G/G	G/G	G/G	G/G	G/G	G/G	G/G	G/G	G/G	G/C	G/G	G/C	G/C	G/G	G/G	G/G	G/G	G/G	G/G	G/C	G/C	G/G	G/C	G/C	G/G	G/G	G/C	G/C	G/G	G/G	G/G	G/G	G/G	G/G	G/G	G/G	G/G	G/G
ST4.03ch03pos1956379.1	3	1956379	T/T	T/T	NA	T/T	T/T	T/T	T/T	T/T	T/T	T/T	T/T	T/T	T/T	T/T	T/T	T/T	T/T	T/A	T/A	T/T	NA	NA	T/T	T/T	T/T	T/T	T/T	T/T	T/A	NA	T/T	T/A	T/T	T/T	T/T	T/A	T/A	T/T	T/T	T/T	T/T	T/T	T/A	T/T	T/T	T/T	T/T
ST4.03ch03pos1956410.1	3	1956410	C/G	C/G	C/C	G/G	NA	G/G	NA	G/G	G/G	NA	G/G	C/G	C/C	G/G	C/G	C/C	C/C	C/C	C/C	C/G	NA	C/G	C/C	C/C	G/G	C/G	C/G	G/G	C/G	C/G	G/G	C/C	C/C	G/G	C/G	C/G	C/C	G/G	C/C	C/C	G/G	G/G	C/C	C/G	C/G	C/G	G/G
ST4.03ch03pos1963483.1	3	1963483	T/T	T/T	T/T	A/A	T/A	A/A	T/A	A/A	A/A	T/A	A/A	T/A	T/T	A/A	T/A	T/T	T/T	T/T	T/A	T/A	T/A	NA	T/T	T/T	A/A	T/A	T/A	T/A	T/A	T/A	A/A	T/A	NA	A/A	T/A	T/A	T/A	A/A	T/A	T/T	A/A	A/A	T/T	T/A	T/A	T/A	A/A
ST4.03ch03pos1963503.1	3	1963503	C/C	C/T	C/T	T/T	C/T	T/T	C/T	T/T	T/T	T/T	T/T	T/T	C/C	T/T	C/T	C/C	T/T	C/T	C/C	T/T	C/C	C/T	C/C	C/C	T/T	T/T	T/T	C/T	C/T	C/T	T/T	C/C	C/C	T/T	T/T	C/T	C/C	T/T	T/T	C/T	T/T	T/T	C/T	C/T	NA	C/T	T/T
ST4.03ch03pos2016812.1	3	2016812	C/C	C/C	C/T	C/C	C/C	C/C	C/C	C/C	C/C	C/C	C/C	C/C	C/C	C/C	C/C	C/C	C/C	C/T	C/T	C/C	NA	NA	C/C	C/C	C/C	C/C	C/C	C/C	NA	C/C	C/C	C/T	C/C	C/C	C/C	C/T	C/T	C/C	C/C	C/C	C/C	C/C	C/T	C/C	C/C	C/C	C/C
ST4.03ch03pos2016847.1	3	2016847	A/A	A/A	A/A	G/G	A/G	G/G	A/G	G/G	G/G	A/G	G/G	A/G	A/A	G/G	A/G	A/A	A/A	A/A	A/A	A/G	A/A	A/G	NA	A/A	A/A	A/G	A/G	A/G	A/G	NA	A/G	A/A	A/A	G/G	A/G	A/G	A/A	G/G	A/A	A/A	A/A	G/G	A/A	A/G	A/G	A/G	G/G
ST4.03ch03pos2083304.1	3	2083304	A/C	NA	A/A	A/A	A/A	A/A	NA	A/A	A/A	A/A	A/A	A/A	A/A	A/A	A/A	A/A	A/A	A/A	A/A	A/C	NA	A/A	A/A	A/A	A/A	A/A	A/C	A/A	A/A	A/A	A/C	A/A	A/A	A/A	A/A	NA	A/A	A/A	A/A	A/C	A/A	A/A	A/A	A/A	A/A	A/A	A/A
ST4.03ch03pos2102012.1	3	2102012	NA	NA	G/A	G/G	G/G	G/G	G/G	G/G	G/G	G/G	G/G	G/G	G/G	G/G	NA	G/G	G/G	G/A	NA	G/G	NA	G/A	G/G	G/G	NA	G/G	G/G	G/G	NA	NA	G/G	NA	G/A	G/G	G/G	G/A	G/A	G/G	NA	G/G	NA	G/G	NA	G/G	G/G	G/G	G/G
ST4.03ch03pos2193975.1	3	2193975	C/C	C/C	C/A	C/C	C/C	C/C	C/C	C/C	C/C	C/C	C/C	C/C	C/C	C/C	C/C	C/C	C/C	C/A	C/A	C/C	C/A	NA	C/C	C/C	C/C	C/C	C/C	C/C	C/A	C/A	C/C	C/A	C/C	C/C	C/C	C/A	C/A	C/C	C/C	C/C	C/C	C/C	C/A	C/C	C/C	C/C	C/C
ST4.03ch03pos2194042.1	3	2194042	T/T	T/T	T/A	T/T	T/T	T/T	T/T	T/T	T/T	T/T	T/T	T/T	T/T	T/T	T/T	T/T	T/T	T/A	T/A	T/T	T/A	NA	T/T	T/T	T/T	T/T	T/T	T/T	T/A	T/A	T/T	T/A	T/T	T/T	T/T	T/A	T/A	T/T	T/T	T/T	T/T	T/T	T/A	T/T	T/T	T/T	T/T
ST4.03ch03pos2216010.1	3	2216010	T/G	T/G	T/G	G/G	G/G	G/G	NA	G/G	G/G	G/G	G/G	G/G	T/G	G/G	G/G	T/G	G/G	T/G	T/G	T/G	T/G	T/G	T/G	T/G	T/T	G/G	T/G	T/G	T/G	T/G	T/G	T/G	T/G	G/G	G/G	T/G	T/G	G/G	T/G	T/T	T/T	G/G	T/G	G/G	G/G	G/G	G/G
ST4.03ch03pos2216020.1	3	2216020	T/C	T/C	T/T	T/T	T/T	T/T	NA	T/T	T/T	T/T	T/T	T/T	T/T	T/T	T/T	T/T	T/T	T/T	T/T	T/C	T/T	T/T	T/T	T/T	T/T	T/T	T/C	T/T	T/T	T/T	T/C	T/T	T/T	T/T	T/T	NA	T/T	T/T	T/T	T/C	T/T	T/T	T/T	T/T	T/T	T/T	T/T
ST4.03ch03pos2216056.1	3	2216056	G/A	G/A	G/A	A/A	A/A	A/A	NA	A/A	A/A	A/A	A/A	A/A	G/A	A/A	A/A	G/A	A/A	G/A	G/A	G/A	G/A	G/A	G/A	G/A	G/A	A/A	G/A	G/A	G/A	G/A	G/A	G/A	G/A	A/A	A/A	G/A	G/A	A/A	G/A	G/G	G/A	A/A	G/A	A/A	A/A	A/A	A/A
ST4.03ch03pos2316498.1	3	2316498	C/C	NA	C/T	C/C	C/C	C/C	C/C	C/C	C/C	C/C	C/C	C/C	C/C	C/C	NA	C/C	C/C	C/T	NA	C/C	NA	NA	C/C	C/C	C/C	C/C	C/C	C/C	NA	NA	C/C	C/T	NA	C/C	C/C	C/T	C/T	C/C	C/C	C/C	C/C	C/C	C/T	C/C	C/C	C/C	C/C
ST4.03ch03pos2316500.1	3	2316500	A/A	NA	A/G	A/A	A/A	A/A	A/A	A/A	A/A	A/A	A/A	A/A	A/A	A/A	NA	A/A	A/A	A/G	NA	A/A	NA	NA	A/A	A/A	A/G	A/A	A/A	A/A	NA	NA	A/A	A/G	NA	A/A	A/A	A/G	A/G	A/A	A/A	A/A	A/G	A/A	A/G	A/A	A/A	A/A	A/A
ST4.03ch03pos2316512.1	3	2316512	T/A	NA	T/A	A/A	A/A	A/A	T/A	A/A	A/A	A/A	A/A	A/A	T/A	A/A	NA	NA	A/A	T/A	NA	T/A	NA	NA	T/A	NA	T/T	A/A	T/A	T/A	T/A	T/A	T/A	T/A	NA	A/A	A/A	T/A	T/A	A/A	NA	T/T	T/T	A/A	T/A	A/A	A/A	A/A	A/A
ST4.03ch03pos2316513.1	3	2316513	A/T	NA	A/T	T/T	T/T	T/T	A/T	T/T	T/T	T/T	T/T	T/T	A/T	T/T	NA	NA	T/T	A/T	NA	A/T	NA	NA	A/T	NA	A/A	T/T	A/T	A/T	A/T	A/T	A/T	A/T	NA	T/T	T/T	A/T	A/T	T/T	NA	A/A	A/A	T/T	A/T	T/T	T/T	T/T	T/T
ST4.03ch03pos2316514.1	3	2316514	C/A	NA	C/A	A/A	A/A	A/A	C/A	A/A	A/A	A/A	A/A	A/A	C/A	A/A	NA	NA	A/A	C/A	NA	C/A	NA	NA	C/A	NA	C/C	A/A	C/A	C/A	C/A	C/A	C/A	C/A	NA	A/A	A/A	C/A	C/A	A/A	NA	C/C	C/C	A/A	C/A	A/A	A/A	A/A	A/A
ST4.03ch03pos2316520.1	3	2316520	C/C	NA	C/T	C/C	C/C	C/C	C/C	C/C	C/C	C/C	C/C	C/C	C/C	C/C	NA	NA	C/C	C/T	NA	C/C	NA	NA	C/C	C/C	C/C	C/C	C/C	C/C	NA	NA	C/C	C/T	NA	C/C	C/C	C/T	C/T	C/C	C/C	C/C	C/C	C/C	C/T	C/C	C/C	C/C	C/C
ST4.03ch03pos2316521.1	3	2316521	A/A	NA	A/G	A/A	A/A	A/A	A/A	A/A	A/A	A/A	A/A	A/A	A/A	A/A	NA	A/A	A/A	A/G	NA	A/A	NA	NA	A/A	A/A	A/G	A/A	A/A	A/A	NA	NA	A/A	A/G	NA	A/A	A/A	A/G	A/G	A/A	A/A	A/A	A/G	A/A	A/G	A/A	A/A	A/A	A/A
ST4.03ch03pos2332750.1	3	2332750	A/T	NA	A/A	A/A	A/A	A/A	A/A	A/A	A/A	A/A	A/A	A/A	A/A	A/A	A/A	A/A	A/A	A/A	A/A	A/T	NA	A/A	A/A	A/A	A/A	A/A	A/T	A/A	A/A	A/A	A/T	A/A	A/A	A/A	A/A	NA	A/A	A/A	A/A	A/T	A/A	A/A	A/A	A/A	A/A	A/A	A/A
ST4.03ch03pos2332780.1	3	2332780	T/T	T/T	T/C	T/T	T/T	T/T	T/T	T/T	T/T	T/T	T/T	T/T	T/T	T/T	T/T	T/T	T/T	T/C	T/C	T/T	NA	T/T	T/T	T/T	T/T	T/T	T/T	T/T	T/C	T/T	T/T	T/C	T/T	T/T	T/T	T/C	T/C	T/T	T/T	T/T	T/T	T/T	NA	T/T	T/T	T/T	T/T
ST4.03ch03pos2437027.1	3	2437027	A/A	A/A	A/T	A/A	A/A	A/A	A/A	A/A	A/A	A/A	A/A	A/A	A/A	A/A	A/A	A/A	A/A	A/T	A/T	A/A	A/T	A/T	A/A	A/A	A/A	A/A	A/A	A/A	A/T	A/A	A/A	A/T	A/A	A/A	A/A	A/T	A/T	A/A	A/A	A/A	A/A	A/A	A/T	A/A	A/A	A/A	A/A
ST4.03ch03pos2437029.1	3	2437029	T/T	T/T	T/G	T/T	T/T	T/T	T/T	T/T	T/T	T/T	T/T	T/T	T/T	T/T	T/T	T/T	T/T	T/G	T/G	T/T	T/G	T/G	T/T	T/T	T/T	T/T	T/T	T/T	T/G	T/T	T/T	T/G	T/T	T/T	T/T	T/G	T/G	T/T	T/T	T/T	T/T	T/T	T/G	T/T	T/T	T/T	T/T
ST4.03ch03pos2437030.1	3	2437030	C/C	C/C	C/T	C/C	C/C	C/C	C/C	C/C	C/C	C/C	C/C	C/C	C/C	C/C	C/C	C/C	C/C	C/T	C/T	C/C	C/T	C/T	C/C	C/C	C/C	C/C	C/C	C/C	C/T	C/C	C/C	C/T	C/C	C/C	C/C	C/T	C/T	C/C	C/C	C/C	C/C	C/C	C/T	C/C	C/C	C/C	C/C
ST4.03ch03pos2437156.1	3	2437156	C/C	C/C	C/T	C/C	C/C	C/C	C/C	C/C	C/C	C/C	C/C	C/C	C/C	C/C	C/C	C/C	C/C	C/T	C/T	C/C	C/T	NA	C/C	C/C	C/C	C/C	C/C	C/C	C/T	C/C	C/C	C/T	C/C	C/C	C/C	C/T	C/T	C/C	C/C	C/C	C/C	C/C	C/T	C/C	C/C	C/C	C/C
ST4.03ch03pos2437167.1	3	2437167	C/T	C/T	C/T	C/T	C/T	C/C	C/T	C/C	C/C	C/T	C/T	C/T	C/T	C/C	C/T	C/T	T/T	C/T	C/T	C/C	C/T	C/T	C/T	C/T	T/T	C/T	T/T	C/T	C/T	C/T	C/C	C/T	C/C	T/T	T/T	C/T	C/T	C/T	T/T	C/C	T/T	C/T	C/T	T/T	C/T	C/T	C/C
ST4.03ch03pos2511763.1	3	2511763	T/C	T/C	T/C	T/C	T/C	T/C	T/C	T/C	T/C	T/C	T/C	T/C	T/C	T/C	T/C	T/C	C/C	T/C	T/C	T/C	T/C	T/C	T/C	T/C	C/C	T/C	C/C	T/C	T/C	T/C	T/C	NA	T/C	C/C	C/C	T/C	T/C	T/C	C/C	T/C	C/C	T/C	T/C	C/C	T/C	T/C	T/C
ST4.03ch03pos2565321.1	3	2565321	C/C	NA	C/T	C/T	NA	T/T	C/T	T/T	T/T	T/T	C/T	T/T	C/T	T/T	NA	NA	T/T	C/T	C/T	C/T	NA	NA	C/T	C/T	C/T	NA	C/T	T/T	C/T	C/T	C/T	NA	C/T	T/T	T/T	C/T	C/T	T/T	T/T	C/T	C/T	T/T	C/T	C/T	T/T	C/T	T/T
ST4.03ch03pos2565384.1	3	2565384	A/A	NA	G/G	G/G	NA	G/G	A/G	G/G	G/G	G/G	G/G	G/G	A/G	G/G	NA	NA	G/G	G/G	G/G	A/G	G/G	G/G	A/G	A/G	A/G	NA	A/G	G/G	G/G	A/G	A/G	G/G	A/G	G/G	G/G	G/G	G/G	G/G	G/G	A/G	A/G	G/G	G/G	A/G	G/G	A/G	G/G
ST4.03ch03pos2617208.1	3	2617208	G/G	G/G	G/G	G/G	G/G	G/G	G/G	G/G	G/G	G/G	G/G	G/G	G/G	G/G	G/G	G/G	G/G	G/G	G/G	G/G	G/G	G/G	G/G	G/G	G/G	G/G	G/G	G/G	G/G	G/G	G/G	G/G	G/G	G/G	G/G	G/G	G/G	G/G	G/G	G/G	G/G	G/G	G/G	G/G	G/G	G/G	G/G
ST4.03ch03pos2678617.1	3	2678617	C/C	NA	C/C	C/C	G/C	C/C	C/C	C/C	C/C	C/C	C/C	C/C	C/C	C/C	C/C	C/C	NA	C/C	C/C	C/C	C/C	C/C	C/C	C/C	C/C	C/C	G/C	G/C	NA	NA	C/C	NA	NA	G/G	G/G	NA	C/C	G/C	C/C	C/C	C/C	G/C	C/C	G/C	C/C	C/C	C/C
ST4.03ch03pos2714895.1	3	2714895	A/A	A/G	A/G	A/A	A/A	A/A	A/A	A/A	A/A	A/G	A/A	A/G	A/A	A/A	A/A	A/A	G/G	A/G	NA	A/A	NA	A/G	A/A	A/A	A/A	NA	A/A	A/A	A/A	A/G	A/A	A/A	A/A	A/A	A/G	A/A	A/A	A/A	A/A	A/A	A/A	A/A	A/G	A/A	A/G	A/A	A/A
ST4.03ch03pos2715436.1	3	2715436	A/A	A/G	A/G	A/A	A/A	A/A	A/A	A/A	A/A	A/G	A/A	A/G	A/A	A/A	A/A	A/A	G/G	A/G	A/G	A/A	A/A	NA	A/A	NA	A/G	NA	A/A	A/A	A/A	A/G	A/A	A/A	A/A	A/A	A/G	A/A	NA	A/A	A/A	NA	A/G	A/A	A/G	A/A	A/G	A/A	A/A
ST4.03ch03pos2787016.1	3	2787016	A/A	NA	C/C	C/C	A/C	C/C	NA	C/C	C/C	C/C	C/C	C/C	C/C	C/C	C/C	C/C	NA	C/C	C/C	A/C	NA	C/C	NA	C/C	C/C	C/C	A/A	A/C	A/C	A/C	A/C	A/C	A/C	A/A	A/A	A/C	A/C	A/C	C/C	A/C	C/C	A/C	C/C	A/A	C/C	C/C	C/C
ST4.03ch03pos2787064.1	3	2787064	C/C	NA	C/T	C/T	C/C	C/C	C/C	C/C	C/C	C/C	C/T	C/C	C/C	C/C	C/C	C/C	NA	C/T	NA	C/C	NA	C/C	C/C	C/C	C/C	C/C	C/C	C/C	C/T	NA	C/C	C/T	C/T	C/C	C/C	C/T	C/T	C/C	C/C	C/C	C/C	C/C	C/T	C/C	C/C	C/C	C/C
ST4.03ch03pos2787067.1	3	2787067	G/G	NA	G/A	G/A	G/A	A/A	NA	A/A	A/A	A/A	G/A	A/A	A/A	A/A	NA	A/A	NA	G/A	NA	G/A	NA	A/A	NA	A/A	A/A	A/A	G/G	G/A	G/A	G/G	G/A	G/G	NA	G/G	G/G	G/A	G/G	G/A	A/A	G/A	A/A	G/A	G/A	G/G	A/A	A/A	A/A
ST4.03ch03pos2790020.1	3	2790020	G/G	G/T	G/T	G/G	G/G	G/G	G/G	G/G	G/G	G/T	G/G	G/T	G/G	G/G	G/G	G/G	G/T	G/T	G/G	G/G	G/G	G/T	G/G	G/G	G/G	G/T	G/G	G/G	G/G	G/T	G/G	G/G	G/G	G/G	G/T	G/G	G/G	G/G	G/G	G/G	G/G	G/G	G/T	G/G	G/T	G/G	G/G
ST4.03ch03pos2790037.1	3	2790037	T/T	T/G	T/G	T/T	T/T	T/T	T/T	T/T	T/T	T/G	T/T	T/G	T/T	T/T	T/T	T/T	T/G	T/G	T/T	T/T	T/T	T/G	T/T	T/T	T/T	T/T	T/T	T/T	T/T	T/G	T/T	T/T	T/T	T/T	T/G	T/T	T/T	T/T	T/T	T/T	T/T	T/T	NA	T/T	T/G	T/T	T/T
ST4.03ch03pos2790077.1	3	2790077	G/G	G/A	G/A	A/A	G/A	A/A	G/A	A/A	A/A	G/A	A/A	G/A	G/A	A/A	G/A	G/A	G/A	G/A	G/A	G/A	G/A	G/A	G/A	G/A	G/A	G/A	G/G	G/A	G/A	G/A	G/A	G/A	G/A	G/G	G/A	G/A	G/A	G/A	A/A	G/A	G/A	G/A	NA	G/G	G/A	G/A	A/A
ST4.03ch03pos2854485.1	3	2854485	T/T	NA	T/C	C/C	C/C	C/C	T/C	C/C	C/C	T/C	C/C	T/C	T/C	C/C	T/C	T/C	T/T	T/C	NA	T/C	NA	T/C	T/C	C/C	C/C	T/C	T/C	T/C	T/C	T/C	C/C	NA	T/C	C/C	T/C	T/C	T/C	C/C	C/C	NA	C/C	C/C	NA	T/C	T/C	T/C	C/C
ST4.03ch03pos2854537.1	3	2854537	A/A	NA	A/G	G/G	G/G	G/G	A/G	G/G	G/G	A/G	G/G	A/G	A/G	G/G	A/G	A/G	A/A	A/G	NA	A/G	NA	A/G	A/G	G/G	G/G	A/G	A/G	A/G	A/G	A/G	G/G	NA	A/G	G/G	A/G	A/G	A/G	G/G	G/G	NA	G/G	G/G	NA	A/G	A/G	A/G	G/G
ST4.03ch03pos2871943.1	3	2871943	T/C	NA	T/T	T/T	T/C	T/T	NA	T/T	T/T	T/T	T/T	T/T	T/T	T/T	T/T	T/T	C/C	T/T	T/T	T/C	NA	NA	T/T	T/T	T/T	T/T	T/C	T/T	T/C	T/C	T/C	T/T	T/C	C/C	C/C	T/T	T/T	T/C	T/T	T/C	T/T	T/C	NA	T/C	T/T	T/T	T/T
ST4.03ch03pos3006742.1	3	3006742	T/T	T/T	T/T	T/T	T/A	T/T	T/T	T/T	T/T	T/T	T/T	T/T	T/T	T/T	T/T	T/T	T/T	T/T	T/T	T/T	T/T	T/T	T/T	T/T	T/A	T/T	T/A	T/T	T/T	T/T	T/T	T/T	T/A	A/A	T/A	T/T	T/T	T/A	T/A	T/T	T/A	T/A	T/T	T/A	T/T	T/T	T/T
ST4.03ch03pos3069699.1	3	3069699	C/C	C/C	C/C	C/C	C/T	C/C	C/C	C/C	C/C	C/C	C/C	C/C	C/C	C/C	C/C	C/C	C/C	C/C	C/C	C/C	NA	C/C	C/C	C/C	C/T	C/C	C/T	C/C	C/C	C/C	C/C	C/C	NA	T/T	C/T	C/C	C/C	C/T	C/T	C/C	C/T	C/T	C/C	C/T	C/C	C/C	C/C
ST4.03ch03pos3069723.1	3	3069723	T/T	NA	T/A	T/A	T/A	T/T	T/T	T/T	T/T	T/T	T/A	T/T	T/T	T/T	T/T	T/T	T/T	T/A	T/A	T/T	NA	NA	T/T	T/T	NA	T/T	T/A	T/T	NA	NA	T/T	NA	NA	A/A	T/A	T/A	T/A	T/A	T/A	T/T	T/A	T/A	T/A	T/A	T/T	T/T	T/T
ST4.03ch03pos3069795.1	3	3069795	G/G	NA	G/A	G/A	G/A	G/G	G/G	G/G	G/G	G/G	G/A	G/G	G/G	G/G	G/G	G/G	G/G	G/A	G/A	G/G	G/A	G/A	G/G	G/G	G/A	G/G	G/A	G/G	NA	G/A	G/G	G/A	G/A	A/A	G/A	G/A	G/A	G/A	G/A	G/G	G/A	G/A	G/A	G/A	G/G	G/G	G/G
ST4.03ch03pos3069828.1	3	3069828	T/T	NA	T/G	T/G	T/G	T/T	T/T	T/T	T/T	T/T	T/G	T/T	T/T	T/T	T/T	T/T	T/T	T/G	T/G	T/T	T/G	T/G	T/T	T/T	T/G	T/T	T/G	T/T	NA	T/G	T/T	T/G	T/G	G/G	T/G	T/G	T/G	T/G	T/G	T/T	T/G	T/G	T/G	T/G	T/T	T/T	T/T
ST4.03ch03pos3071641.1	3	3071641	C/T	C/T	C/C	C/C	C/C	C/C	NA	C/C	C/C	C/C	C/C	C/C	C/C	C/C	C/C	C/C	C/C	C/C	C/C	C/T	T/T	NA	C/C	C/C	C/C	C/C	C/C	C/C	C/T	C/T	C/T	T/T	C/C	NA	C/C	C/T	C/T	C/C	C/C	C/T	C/C	C/C	C/C	C/C	C/C	C/C	C/C
ST4.03ch03pos3143837.1	3	3143837	NA	C/C	C/C	C/C	C/T	C/C	C/C	C/C	C/C	C/C	C/C	C/C	C/C	C/C	C/C	C/C	C/C	C/C	C/C	C/C	NA	C/C	C/C	C/C	T/T	C/C	C/T	C/C	C/C	C/C	C/C	NA	C/T	T/T	C/T	C/C	C/T	C/T	C/C	C/C	T/T	C/T	C/C	C/T	C/C	C/C	C/C
ST4.03ch03pos3143855.1	3	3143855	NA	C/T	C/T	T/T	C/T	T/T	T/T	T/T	T/T	C/T	T/T	C/T	T/T	T/T	T/T	T/T	C/C	C/C	T/T	T/T	NA	C/T	T/T	T/T	C/C	C/T	C/T	C/T	C/T	C/T	T/T	NA	C/C	C/C	C/C	C/T	C/C	C/T	C/C	T/T	C/C	C/T	C/C	C/T	C/T	T/T	T/T
ST4.03ch03pos3409553.1	3	3409553	A/A	A/A	A/T	A/T	A/T	A/A	A/A	A/A	A/A	NA	A/T	A/T	A/A	A/A	A/A	A/A	A/A	A/T	A/T	A/A	NA	NA	NA	A/A	A/T	A/A	NA	A/A	NA	A/T	A/A	A/T	NA	T/T	A/T	NA	A/T	A/T	NA	A/A	NA	A/T	A/T	A/T	A/T	A/A	A/A
ST4.03ch03pos3409579.1	3	3409579	C/T	NA	T/T	T/T	NA	T/T	C/T	T/T	T/T	T/T	T/T	T/T	C/T	T/T	NA	NA	T/T	T/T	C/T	T/T	NA	NA	NA	C/T	T/T	NA	NA	T/T	T/T	C/T	T/T	T/T	NA	T/T	T/T	T/T	T/T	T/T	NA	T/T	T/T	T/T	T/T	C/T	NA	C/T	T/T
ST4.03ch03pos3430873.1	3	3430873	T/A	T/A	T/A	T/A	T/A	T/T	NA	T/T	T/T	T/T	T/A	T/T	T/T	T/T	T/T	T/T	T/T	T/A	T/A	T/A	A/A	T/T	NA	T/T	T/A	T/T	T/T	T/A	T/A	T/A	T/A	A/A	A/A	T/T	T/T	T/A	A/A	T/A	A/A	T/A	T/A	T/A	T/A	T/T	T/T	T/T	T/T
ST4.03ch03pos3451814.1	3	3451814	NA	NA	G/A	G/A	A/A	A/A	NA	A/A	A/A	A/A	G/A	A/A	A/A	A/A	A/A	A/A	A/A	G/A	G/G	A/A	NA	G/A	A/A	A/A	G/G	A/A	NA	G/A	G/A	G/A	A/A	G/G	G/A	NA	A/A	G/A	G/G	NA	G/G	A/A	G/G	NA	G/A	NA	A/A	A/A	A/A
ST4.03ch03pos3495083.1	3	3495083	A/A	A/A	A/A	A/A	A/A	A/A	A/A	A/A	A/A	A/A	A/A	A/A	A/A	A/A	A/A	A/A	A/A	A/A	A/A	A/A	A/A	A/A	A/A	A/A	A/G	A/A	A/A	A/A	A/A	A/G	A/A	A/A	A/G	A/A	A/A	A/A	A/A	A/A	G/G	A/A	A/G	A/A	A/A	A/A	A/A	A/A	A/A
ST4.03ch03pos3495092.1	3	3495092	G/G	G/T	T/T	T/T	G/T	T/T	NA	T/T	T/T	G/T	T/T	G/T	T/T	T/T	T/T	T/T	T/T	T/T	G/T	G/T	T/T	NA	T/T	G/T	T/T	T/T	G/G	T/T	T/T	G/T	G/T	T/T	T/T	G/G	G/T	T/T	T/T	G/G	T/T	G/T	T/T	G/G	T/T	G/G	G/T	T/T	T/T
ST4.03ch03pos3495127.1	3	3495127	A/A	A/A	A/A	A/A	A/A	A/A	A/A	A/A	A/A	A/A	A/A	A/A	A/A	A/A	A/A	A/A	A/A	A/A	A/A	A/A	A/A	A/A	A/A	A/A	A/C	A/A	A/A	A/A	A/A	A/C	A/A	A/A	A/C	A/A	A/A	A/A	A/A	A/A	C/C	A/A	A/C	A/A	A/A	A/A	A/A	A/A	A/A
ST4.03ch03pos3495143.1	3	3495143	C/C	C/T	C/T	C/T	C/T	C/T	C/T	C/T	C/T	C/T	C/T	C/T	C/T	C/T	C/T	C/T	C/T	C/T	C/C	C/T	C/C	C/T	C/T	C/T	C/T	C/T	C/C	C/T	C/T	C/T	C/T	C/C	C/T	C/C	C/T	C/T	C/C	C/C	C/C	C/T	C/T	C/C	C/T	C/C	C/T	C/T	C/T
ST4.03ch03pos3760813.1	3	3760813	C/C	C/C	NA	C/T	C/C	C/C	C/C	C/C	C/C	C/C	NA	C/C	C/C	C/C	C/C	C/C	C/C	C/T	C/T	C/C	NA	NA	C/C	NA	C/C	C/C	C/C	C/C	NA	NA	C/C	C/T	NA	C/C	C/C	C/T	C/T	C/C	C/C	C/C	C/C	C/C	C/T	C/C	C/C	C/C	C/C
ST4.03ch03pos3764207.1	3	3764207	T/T	T/T	T/G	T/G	T/T	T/T	T/T	T/T	T/T	T/T	T/G	T/T	T/T	T/T	T/T	T/T	T/T	T/G	T/G	T/T	T/G	T/T	T/T	T/T	T/G	T/T	T/T	T/T	NA	T/G	T/T	T/G	T/G	T/T	T/T	T/G	T/G	T/T	T/T	T/T	T/G	T/T	T/G	T/T	T/T	T/T	T/T
ST4.03ch03pos3764218.1	3	3764218	T/T	T/T	T/C	T/C	T/T	T/T	T/T	T/T	T/T	T/T	T/C	T/T	T/T	T/T	T/T	T/T	T/T	T/C	T/C	T/T	T/C	T/T	T/T	T/T	T/C	T/T	T/T	T/T	NA	T/C	T/T	T/C	T/C	T/T	T/T	T/C	T/C	T/T	T/T	T/T	T/C	T/T	T/C	T/T	T/T	T/T	T/T
ST4.03ch03pos3764264.1	3	3764264	A/C	A/C	A/C	A/A	A/C	A/A	A/A	A/A	A/A	A/C	A/A	A/C	A/A	A/A	A/A	A/A	C/C	A/C	A/A	A/A	A/A	A/C	A/A	A/A	A/A	NA	A/C	A/A	A/A	A/C	A/C	A/A	A/C	C/C	C/C	A/A	NA	C/C	A/A	A/A	A/A	C/C	A/C	A/C	A/C	A/A	A/A
ST4.03ch03pos3797318.1	3	3797318	A/A	NA	A/T	A/T	A/A	A/A	A/A	A/A	A/A	A/A	A/T	A/A	A/A	A/A	A/A	A/A	A/A	A/T	A/T	A/A	A/T	A/A	A/A	A/A	A/A	A/A	A/A	A/A	NA	A/T	A/A	A/T	A/T	A/A	A/A	A/T	A/T	A/A	A/A	A/A	A/A	A/A	A/T	A/A	A/A	A/A	A/A
ST4.03ch03pos3797347.1	3	3797347	G/T	G/T	G/T	G/G	G/T	G/G	G/G	G/G	G/G	G/T	G/G	G/T	G/G	G/G	G/G	G/G	T/T	G/T	G/G	G/G	G/T	G/T	G/G	G/G	G/T	G/T	G/T	G/G	G/T	G/T	G/T	G/T	G/T	T/T	T/T	G/T	G/T	T/T	G/G	G/G	G/T	T/T	G/T	G/T	G/T	G/G	G/G
ST4.03ch03pos4115631.1	3	4115631	C/T	NA	NA	C/T	C/C	C/C	C/C	C/C	C/C	C/C	C/T	C/C	C/C	C/C	C/C	C/C	C/C	C/T	C/C	C/C	NA	C/C	C/C	C/C	NA	C/C	C/C	C/C	C/T	C/C	C/C	T/T	NA	C/C	C/C	C/T	NA	C/C	C/C	C/C	C/T	C/C	C/T	C/C	C/C	C/C	C/C
ST4.03ch03pos4115648.1	3	4115648	T/G	NA	NA	T/G	T/T	T/T	T/T	T/T	T/T	T/T	T/G	T/T	T/T	T/T	T/T	T/T	T/T	T/G	T/T	T/T	NA	T/T	T/T	T/T	NA	T/T	T/T	T/T	T/G	T/T	T/T	G/G	NA	T/T	T/T	T/G	NA	T/T	T/T	T/T	T/G	T/T	T/G	T/T	T/T	T/T	T/T
ST4.03ch03pos4115650.1	3	4115650	G/T	NA	NA	G/T	G/G	G/G	G/G	G/G	G/G	G/G	G/T	G/G	G/G	G/G	G/G	G/G	G/G	G/T	G/G	G/G	NA	G/G	G/G	G/G	NA	G/G	G/G	G/G	G/T	G/G	G/G	T/T	NA	G/G	G/G	G/T	NA	G/G	G/G	G/G	G/T	G/G	G/T	G/G	G/G	G/G	G/G
ST4.03ch03pos4115651.1	3	4115651	T/C	NA	NA	T/C	T/T	T/T	T/T	T/T	T/T	T/T	T/C	T/T	T/T	T/T	T/T	T/T	T/T	T/C	T/T	T/T	NA	T/T	T/T	T/T	NA	T/T	T/T	T/T	T/C	T/T	T/T	C/C	NA	T/T	T/T	T/C	T/C	T/T	T/T	T/T	T/T	T/T	T/C	T/T	T/T	T/T	T/T
ST4.03ch03pos4115654.1	3	4115654	A/C	NA	NA	A/C	A/A	A/A	A/A	A/A	A/A	A/A	A/C	A/A	A/A	A/A	A/A	A/A	A/A	A/C	A/A	A/A	NA	A/A	A/A	A/A	NA	A/A	A/A	A/A	A/C	A/A	A/A	C/C	NA	A/A	A/A	A/C	NA	A/A	A/A	A/A	A/C	A/A	A/C	A/A	A/A	A/A	A/A
ST4.03ch03pos4115655.1	3	4115655	C/T	NA	NA	C/T	C/C	C/C	C/C	C/C	C/C	C/C	C/T	C/C	C/C	C/C	C/C	C/C	C/C	C/T	C/C	C/C	NA	C/C	C/C	C/C	NA	C/C	C/C	C/C	C/T	C/C	C/C	T/T	NA	C/C	C/C	C/T	NA	C/C	C/C	C/C	C/T	C/C	C/T	C/C	C/C	C/C	C/C
ST4.03ch03pos4976569.1	3	4976569	NA	NA	NA	C/C	C/C	C/C	C/C	C/C	C/C	C/C	C/C	C/C	C/C	C/C	C/C	C/C	NA	C/C	C/C	C/C	NA	NA	C/C	C/C	C/C	C/C	C/C	C/C	C/C	NA	C/C	NA	NA	C/C	C/C	C/C	NA	C/C	NA	C/C	C/C	C/C	C/C	C/C	C/C	C/C	C/C
ST4.03ch03pos5424993.1	3	5424993	G/G	NA	G/G	G/G	G/G	G/G	G/G	G/G	G/G	G/G	G/G	G/G	G/G	G/G	G/G	G/G	G/G	G/G	G/G	G/G	NA	G/G	G/G	G/G	G/C	G/G	G/G	G/G	G/G	G/G	G/G	NA	NA	G/G	G/G	NA	NA	G/G	G/G	G/G	G/C	G/G	G/G	G/G	G/G	G/G	G/G
ST4.03ch03pos5475600.1	3	5475600	T/T	C/T	C/T	C/T	C/T	C/C	C/T	C/C	C/T	C/C	C/T	C/C	C/C	C/C	C/C	C/C	T/T	C/T	C/T	C/T	T/T	NA	C/C	C/C	C/C	C/T	C/C	C/C	C/T	C/T	C/T	T/T	T/T	C/C	C/T	C/T	T/T	C/T	C/C	C/T	C/C	C/T	C/T	C/T	C/C	C/C	C/C
ST4.03ch03pos5475626.1	3	5475626	G/G	C/G	C/G	C/G	C/G	C/C	C/G	C/C	C/G	C/C	C/G	C/C	C/C	C/C	C/C	C/C	G/G	C/G	C/G	C/G	G/G	NA	C/C	C/C	C/C	C/G	C/C	C/C	C/G	C/G	C/G	G/G	G/G	C/C	C/G	C/G	G/G	C/G	C/C	C/G	C/C	C/G	C/G	C/G	C/C	C/C	C/C
ST4.03ch03pos5513777.1	3	5513777	A/A	A/G	A/G	G/G	A/G	G/G	NA	G/G	A/G	G/G	G/G	G/G	G/G	G/G	G/G	G/G	A/A	A/G	NA	A/G	NA	G/G	G/G	G/G	A/G	G/G	G/G	G/G	A/G	A/G	A/G	A/A	NA	G/G	A/G	A/G	A/G	A/G	G/G	A/G	A/G	A/G	A/G	A/G	G/G	G/G	G/G
[truncated: 5,717 more rows]
[truncated: 49 more columns]
