# Supplementary material
Source: MDPI journal article supplement (https://www.mdpi.com/2073-4395/9/7/366)
Supplement: s1 [file s1 › Supplementary material 3.xlsx]

## Sheet: Hoja1
Genotype	Delphinidin	DS	Cyanidin	DS	Petunidin	DS	Pelargonidin	DS	Peonidin	DS	Total aprox.	Groupsa
CCC002	1553	1.40895	0.904	0.439519	0.180	0.156184	37863	24.3156	4795	0.778099	45295	2
CCC003	0.000	0.00	0.000	0.00	0.000	0.00	0.000	0.00	0.000	0.00	0.000	1
CCC004	6317	1.37318	12016	5.90972	41294	19.0047	30005	16.4343	22770	11.3267	112402	3
CCC005	0.000	0.00	0.000	0.00	0.646	0.00	0.395	0.00	0.514	0.00	1556	1
CCC006	0.000	0.00	0.000	0.00	0.000	0.00	0.000	0.00	0.000	0.00	0.000	1
CCC007	1304	1.12903	3068	0.234229	8081	0.617007	2876	0.219568	5625	0.429513	20952	1
CCC008	0.230	0.230386	0.239	0.224234	0.288	0.270121	3126	1.86821	1658	1.55437	5541	1
CCC009	3830	4.49871	5344	0.151314	21801	1.32665	64345	5.65896	19175	1.47116	114495	4
CCC011	7488	6.80112	1772	0.58978	0.651	0.662434	167758	67.2984	11458	2.82226	189127	5
CCC013	6660	5.55044	3183	0.633801	41821	9.16425	4041	3.39361	9963	2.68374	65668	3
CCC014	0.000	0.00	0.000	0.00	0.000	0.00	0.000	0.00	0.000	0.00	0.000	1
CCC015	1724	1.07466	1429	0.221569	11999	4.97479	10424	16.5854	4813	1.49459	30389	1
CCC016	0.000	0.00	0.000	0.00	0.000	0.00	0.000	0.00	0.000	0.00	0.000	1
CCC017	4654	3.62063	1674	0.860726	7673	2.38331	26184	20.8337	4723	2.31698	44908	2
CCC019	0.428	0.43687	9198	8.8211	0.000	0	4228	0.25378	2048	0.113022	15902	6
CCC020	0.000	0.00	0.000	0.00	0.000	0.00	0.000	0.00	0.000	0.00	0.000	1
CCC021	0.000	0.00	0.000	0.00	0.000	0.00	0.000	0.00	0.000	0.00	0.000	1
CCC023	5310	2.40793	7388	2.15576	24219	7.73898	13660	6.22513	14053	3.58959	64631	3
CCC024	2460	0.671188	1106	0.302467	4833	0.156835	10691	0.68154	5452	0.263817	24542	1
CCC027	3000	4.85667	1615	1.15618	0.331	0.573501	37294	30.0102	4203	3.05052	46444	2
CCC030	2824	1.98889	1808	0.666044	8058	3.77799	29494	12.8428	7591	1.28861	49775	2
CCC031	0.233	0.00	0.000	0.00	0.508	0.00	0.577	0.00	0.536	0.00	1854	2
CCC032	2754	1.76167	1894	0.514627	20076	7.52909	2822	2.17783	5185	1.74247	32731	1
CCC033	0.000	0.00	0.000	0.00	0.000	0.00	0.000	0.00	0.000	0.00	0.000	1
CCC034	0.000	0.00	0.000	0.00	0.000	0.00	0.000	0.00	0.000	0.00	0.000	1
CCC035	0.641	0.0481772	0.243	0.23354	1348	0.124279	0.000	0	0.741	0.0717064	2974	1
CCC036	0.486	0.117699	0.940	0.227846	1199	0.290594	0.000	0	0.654	0.158523	3279	1
CCC037	0.000	0.00	0.000	0.00	0.000	0.00	0.000	0.00	0.486	0.00	0.486	1
CCC038	0.000	0.00	0.000	0.00	0.000	0.00	0.000	0.00	0.000	0.00	0.000	1
CCC041	0.479	0.541673	0.241	0.247304	0.356	0.365669	9252	3.94577	4269	1.59124	14597	1
CCC042	2066	1.08704	0.585	0.221836	1444	2.5007	7449	4.03602	2688	1.23513	14232	1
CCC043	0.000	0	0.253	0.241337	0.000	0	0.504	0.480308	0.907	0.200479	1664	1
CCC044	3015	0.805464	2170	0.491669	10159	3.39803	28076	7.98146	7335	0.815954	50756	2
CCC045	0.000	0.00	0.000	0.00	0.000	0.00	0.000	0.00	0.000	0.00	0.000	1
CCC047	1314	1.49788	2771	3.78908	2247	0.99496	18160	5.82731	2659	1.2877	27151	1
CCC051	0.226	0.214954	0.492	0.0811349	0.000	0	2125	0.161019	1647	0.542309	4490	1
CCC052	17136	10.3431	7092	1.50844	94407	30.1952	4019	2.555	25468	6.44537	148123	6
CCC053	0.453	0.00	0.000	0.00	0.000	0.00	1687	0.00	1480	0.00	3620	1
CCC056	0.220	0.00	0.000	0.00	0.538	0.00	0.545	0.00	0.537	0.00	1840	1
CCC057	0.000	0.00	0.000	0.00	0.000	0.00	0.000	0.00	0.000	0.00	0.000	1
CCC059	0.000	0.00	0.383	0.00	0.000	0.00	0.000	0.00	0.000	0.00	0.383	1
CCC061	0.000	0	0.642	0.144954	0.000	0	4473	1.25359	2447	0.899334	7562	1
CCC062	0.000	0.00	0.000	0.00	0.000	0.00	0.000	0.00	0.000	0.00	0.000	1
CCC063	0.000	0.00	0.000	0.00	0.000	0.00	0.000	0.00	0.000	0.00	0.000	1
CCC064	1976	1.28159	1378	0.0520571	0.609	0.527776	83031	36.7356	10654	2.3637	97648	4
CCC065	0.000	0.00	0.000	0.00	0.000	0.00	0.000	0.00	0.000	0.00	0.000	1
CCC066	1613	1.42274	1352	0.878619	3138	2.3072	2405	1.6416	2347	1.5255	10855	1
CCC069	5007	4.19926	1391	0.88722	0.351	0.304144	97564	45.2272	14097	10.5271	118411	5
CCC070	5512	5.29269	1421	1.23793	34835	20.8917	3533	3.262	8147	5.29893	53447	3
CCC071	0.000	0	0.144	0.129855	0.000	0	0.368	0.333167	0.589	0.214	1101	1
CCC072	0.642	0.60141	0.143	0.136105	0.000	0	1578	0.611413	1476	0.169625	3839	1
CCC073	4737	4.35103	1784	0.65493	27213	12.1891	3010	2.1633	6780	3.08655	43525	1
CCC074	2635	1.93891	1505	0.658385	13940	6.9066	1587	1.41635	3453	1.65617	23120	1
CCC076	0.000	0.00	0.000	0.00	0.000	0.00	0.000	0.00	0.000	0.00	0.000	1
CCC079	11259	16.7204	1464	1.01861	1438	1.74226	109205	47.6215	22464	23.4555	145828	5
CCC080	0.000	0.00	0.000	0.00	0.000	0.00	0.375	0.00	0.000	0.00	0.375	1
CCC081	4587	2.24592	0.820	0.163794	0.494	0.475762	25251	3.3401	6733	3.27721	37886	2
CCC083	3384	3.42303	3097	2.04281	11945	7.44092	6067	4.54065	7682	4.72103	32175	1
CCC086	5987	2.67364	5603	1.09365	19411	4.77546	10206	2.902	9421	3.12197	50628	3
CCC087	0.590	0.222973	0.504	0.0992996	0.258	0.253716	2313	1.091	13096	10.3647	16761	1
CCC088	0.299	0.0374581	0.144	0.139643	0.000	0	2622	0.670619	1321	0.35596	4387	1
CCC089	13105	0.402103	5283	2.31781	76508	45.9492	5803	5.68836	13109	8.1303	113809	3
CCC091	1032	1.48606	3255	4.83973	12348	20.2599	2106	2.56814	6094	9.52687	24834	1
CCC092	13661	4.77235	25995	6.56986	59667	13.4799	9658	1.47608	31047	5.6279	140028	6
CCC093	1384	0.76584	0.248	0.249233	0.714	0.0759015	7506	3.68336	2773	1.23904	12624	1
CCC094	0.187	0.00	0.000	0.00	0.000	0.00	0.599	0.00	0.436	0.00	1222	1
CCC096	0.000	0.00	0.000	0.00	0.000	0.00	0.352	0.00	0.000	0.00	0.352	1
CCC098	0.189	0.00	0.000	0.00	0.000	0.00	0.000	0.00	0.000	0.00	0.189	1
CCC099	0.000	0.00	0.000	0.00	0.000	0.00	0.758	0.00	0.490	0.00	1248	1
CCC100	4306	5.05053	1805	0.669495	0.695	0.622433	74537	33.7907	7628	1.4839	88971	4
CCC101	0.000	0.00	0.000	0.00	0.000	0.00	0.000	0.00	0.000	0.00	0.000	1
CCC102	0.000	0.00	0.000	0.00	0.000	0.00	0.000	0.00	0.000	0.00	0.000	1
CCC103	1774	1.5366	0.956	0.894801	8010	10.0995	2387	2.70476	2534	2.14914	15661	1
CCC104	2933	3.4321	6350	5.71188	23784	22.4231	6942	6.02395	11504	10.4316	51513	3
CCC106	5957	2.05805	7311	1.90067	21736	9.12699	13117	4.61197	11767	3.03394	59887	3
CCC108	0.772	0.00	0.000	0.00	0.000	0.00	3664	0.00	1441	0.00	5877	1
CCC109	2118	1.56416	0.405	0.40756	3125	0.736132	3409	0.362139	4029	2.1847	13085	1
CCC110	0.000	0.00	0.000	0.00	0.000	0.00	0.000	0.00	0.000	0.00	0.000	1
CCC112	0.213	0.00	0.000	0.00	0.000	0.00	0.000	0.00	0.000	0.00	0.213	1
CCC113	0.000	0.00	0.000	0.00	0.000	0.00	0.000	0.00	0.000	0.00	0.000	1
CCC114	0.000	0.00	0.000	0.00	0.000	0.00	0.000	0.00	0.000	0.00	0.000	1
CCC115	15249	9.81082	1377	0.832498	1178	0.389744	86843	63.896	16184	0.578422	120831	5
CCC116	0.710	0.00	0.817	0.00	0.000	0.00	2915	0.00	1797	0.00	6239	1
CCC117	18845	12.1206	8594	6.91129	92308	81.1593	3265	1.51048	15319	11.4453	138330	6
CCC118	3297	1.00313	0.669	0.041425	0.000	0	16922	1.34329	8358	3.33944	29246	2
CCC119	3982	1.67039	6666	4.37087	20984	15.6931	32703	31.7947	13461	11.7701	77795	3
CCC120	0.859	0.389316	0.244	0.232229	0.244	0.233358	4756	2.08591	2352	1.21223	8455	1
CCC121	4889	5.07444	0.697	0.660572	0.653	0.0113144	26865	27.7629	5943	3.24752	39046	2
CCC122	0.439	0.00	0.348	0.00	0.000	0.00	0.951	0.00	0.798	0.00	2536	1
CCC123	2245	1.03783	1716	1.89488	8932	0.834846	6432	1.6946	6306	1.68376	25632	1
CCC124	4277	2.14335	0.958	0.267491	0.491	0.427172	27704	12.4517	6307	1.38553	39736	2
CCC125	5791	0.964794	2890	1.0968	1175	0.430259	123270	18.7721	15729	7.37763	148855	5
CCC126	3578	4.62685	2393	0.736004	27879	47.4871	84904	40.4434	13678	6.72526	132432	4
CCC127	2071	1.23534	0.832	0.219413	0.272	0.471122	16669	6.90391	5281	0.670618	25125	1
CCC128	0.694	0.114563	0.000	0	0.000	0	4520	0.556705	1620	0.153936	6834	1
CCC129	0.249	0.00	0.000	0.00	0.000	0.00	0.376	0.00	0.416	0.00	1041	1
CCC131	0.000	0.00	0.000	0.00	0.000	0.00	0.000	0.00	0.000	0.00	0.000	1
CCC132	0.751	0.00	0.304	0.00	0.000	0.00	2967	0.00	2346	0.00	6367	1
CCC133	0.000	0.00	0.000	0.00	0.000	0.00	0.000	0.00	0.000	0.00	0.000	1
CCC135	0.000	0.00	0.000	0.00	0.000	0.00	0.000	0.00	0.000	0.00	0.000	1
CCC136	0.000	0.00	0.000	0.00	0.000	0.00	0.000	0.00	0.000	0.00	0.000	1
CCC137	0.000	0.00	0.000	0.00	0.000	0.00	0.000	0.00	0.000	0.00	0.000	1
CCC138	0.000	0.00	0.000	0.00	0.000	0.00	0.000	0.00	0.000	0.00	0.000	1
CCC140	0.000	0.00	0.000	0.00	0.000	0.00	0.000	0.00	0.000	0.00	0.000	1
CCC141	0.325	0.09648	0.000	0	0.000	0	2085	0.586256	1319	0.359138	3730	1
CCC142	0.000	0.00	0.000	0.00	0.000	0.00	0.000	0.00	0.000	0.00	0.000	1
CCC143	0.000	0.00	0.000	0.00	0.000	0.00	0.000	0.00	0.000	0.00	0.000	1
CCC144	0.000	0.00	0.000	0.00	0.000	0.00	0.000	0.00	0.000	0.00	0.000	1
CCC145	0.000	0.00	0.000	0.00	0.000	0.00	0.000	0.00	0.000	0.00	0.000	1
