# Supplementary material
Source: MDPI journal article supplement (https://www.mdpi.com/2073-4395/9/7/366)

**Supplementary Material 6:** Manhattan graph and Q-Q plot graph to visualize the distribution of association P-values from the genome-wide association study for anthocyanidins content in cooked tubers of *Solanum tuberosum* L. Group Phureja.

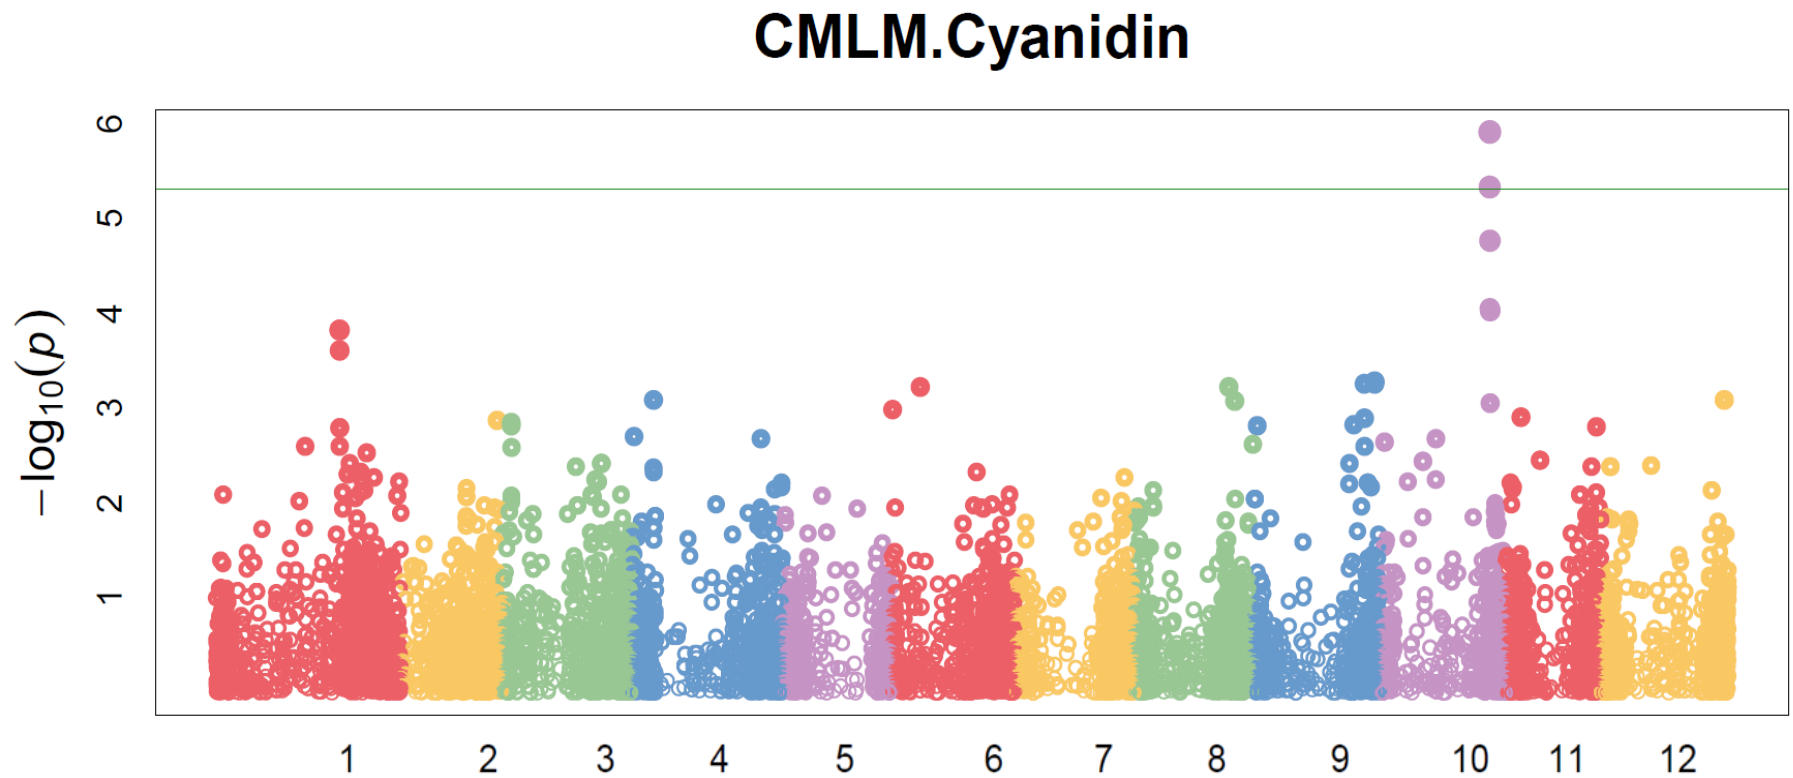

# CMLM.Cyanidin

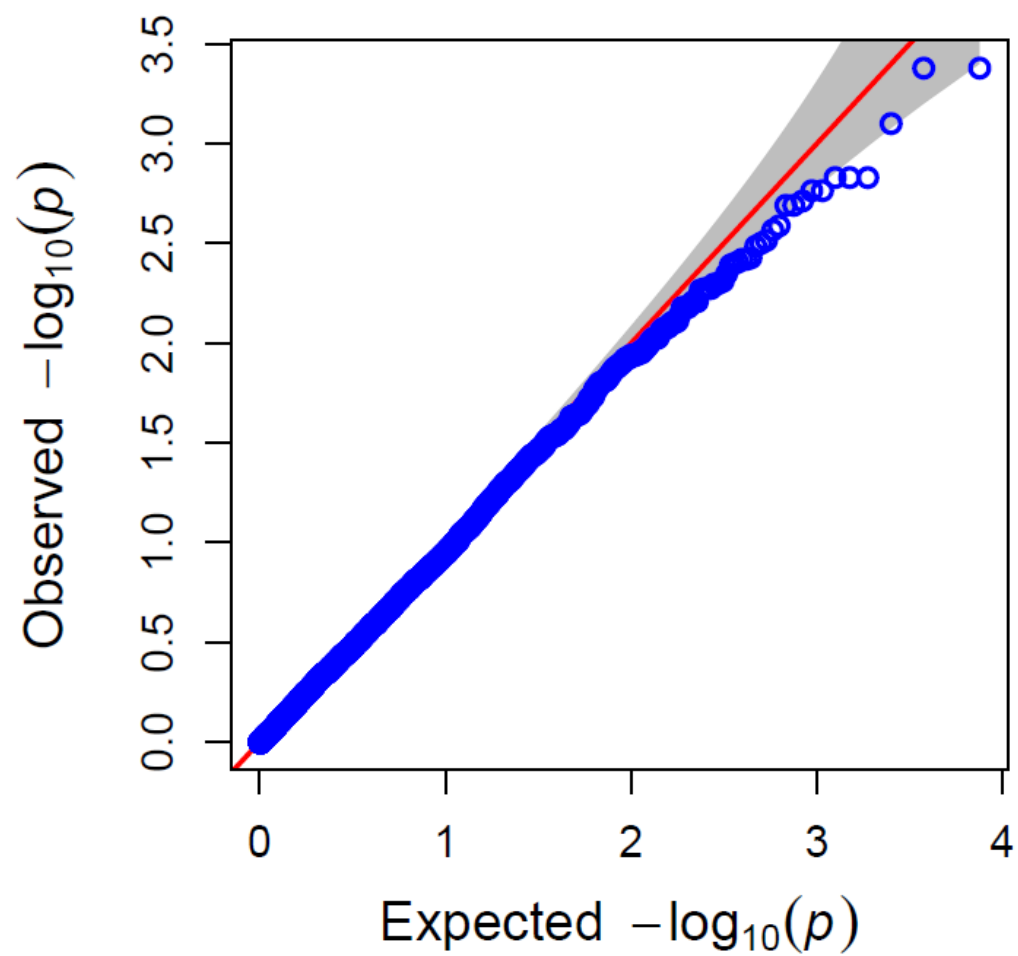

# CMLM.Delphinidin

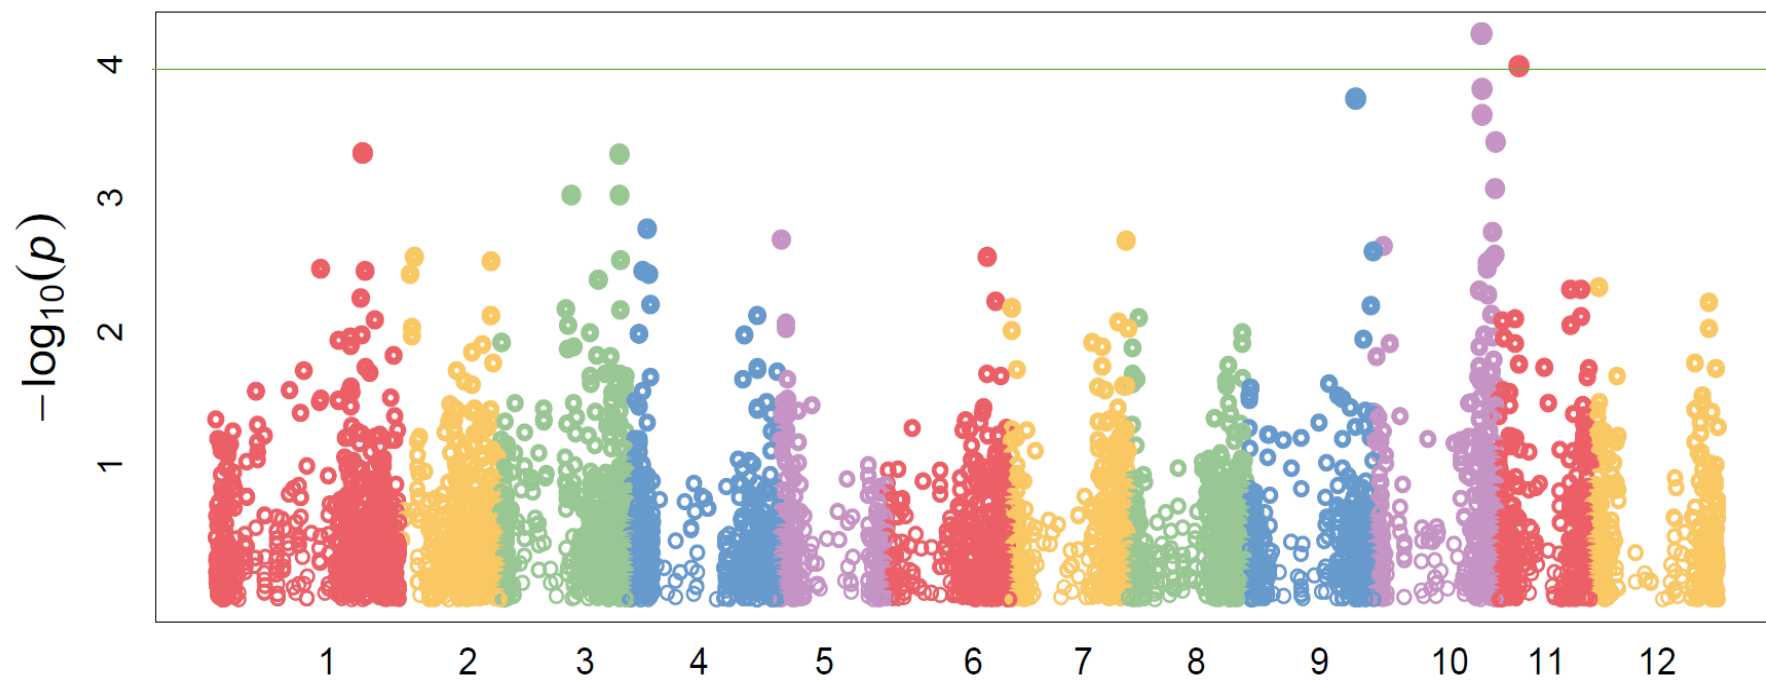

# CMLM.Delphinidin

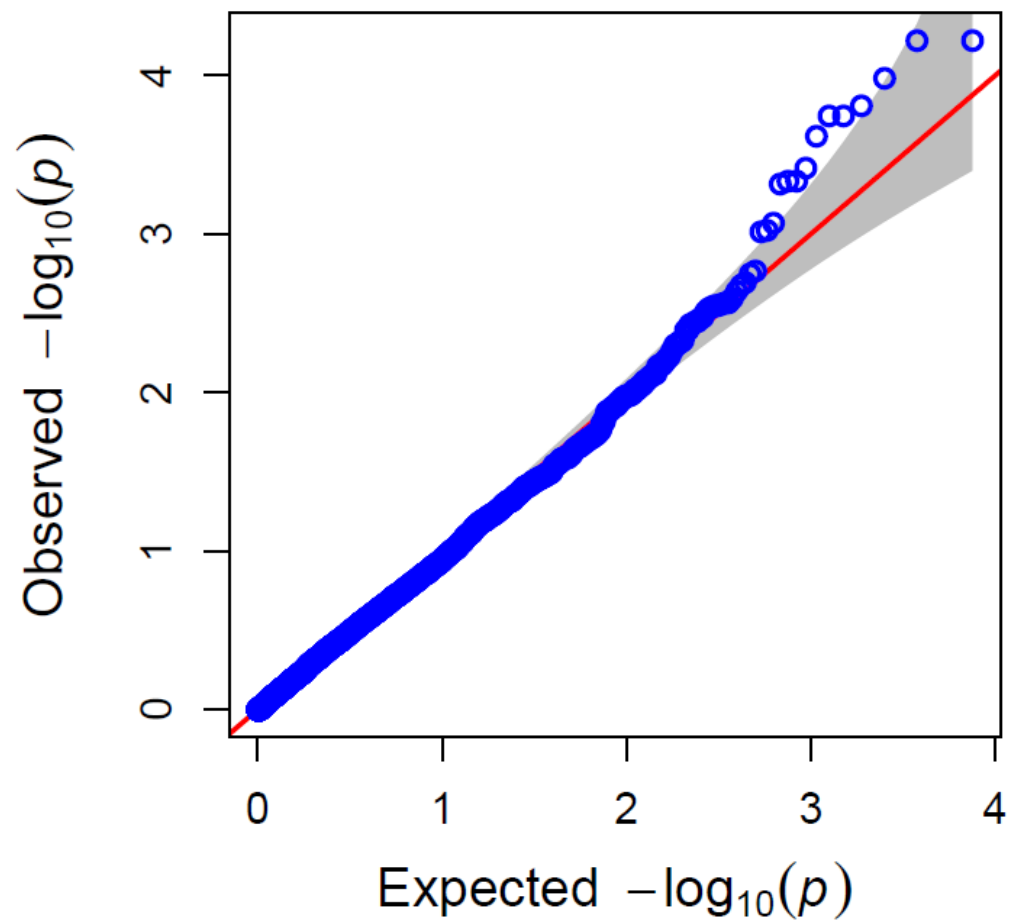

# CMLM.Pelargonidin

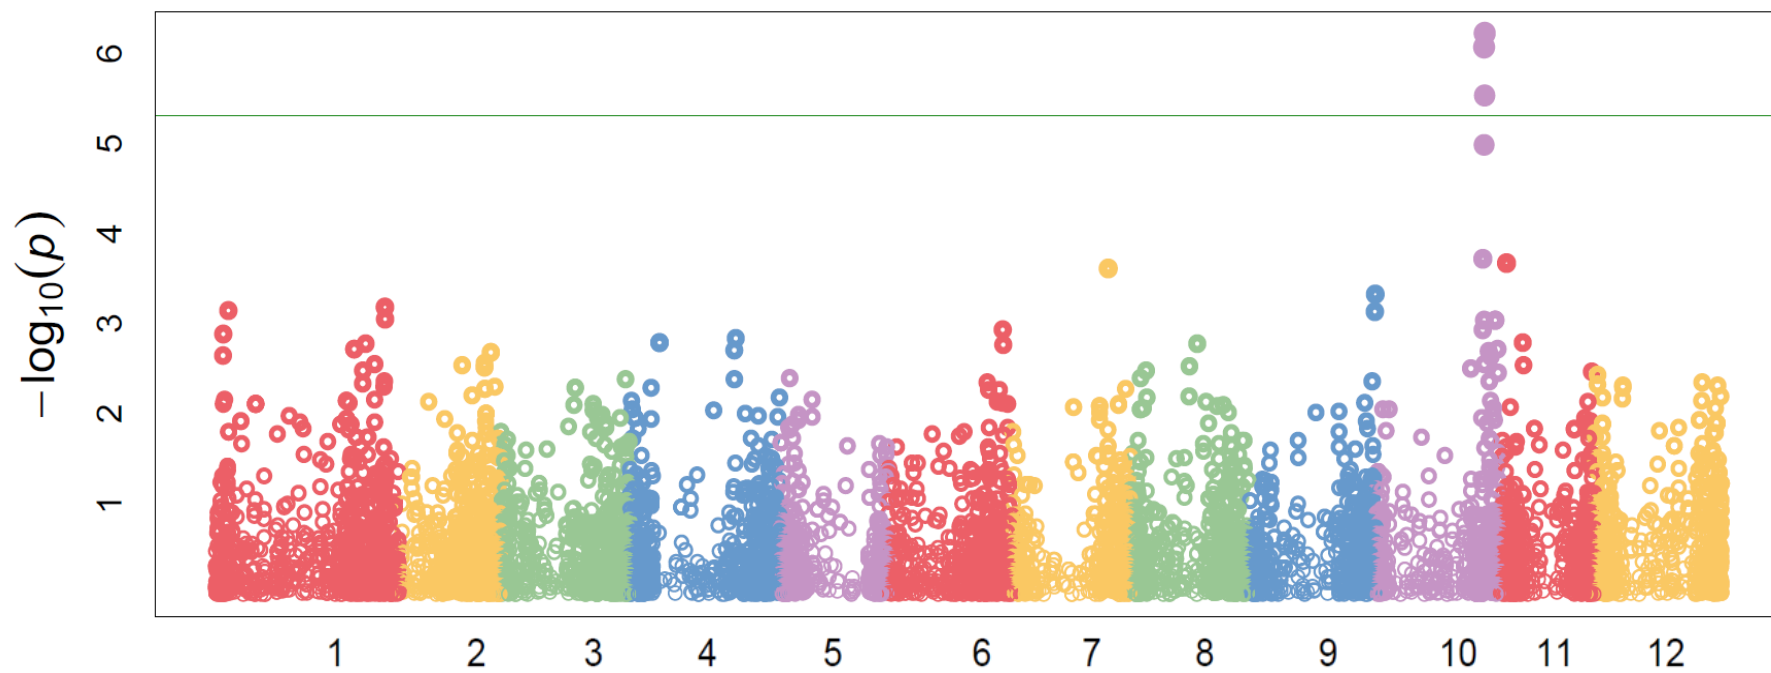

# CMLM.Pelargonidin

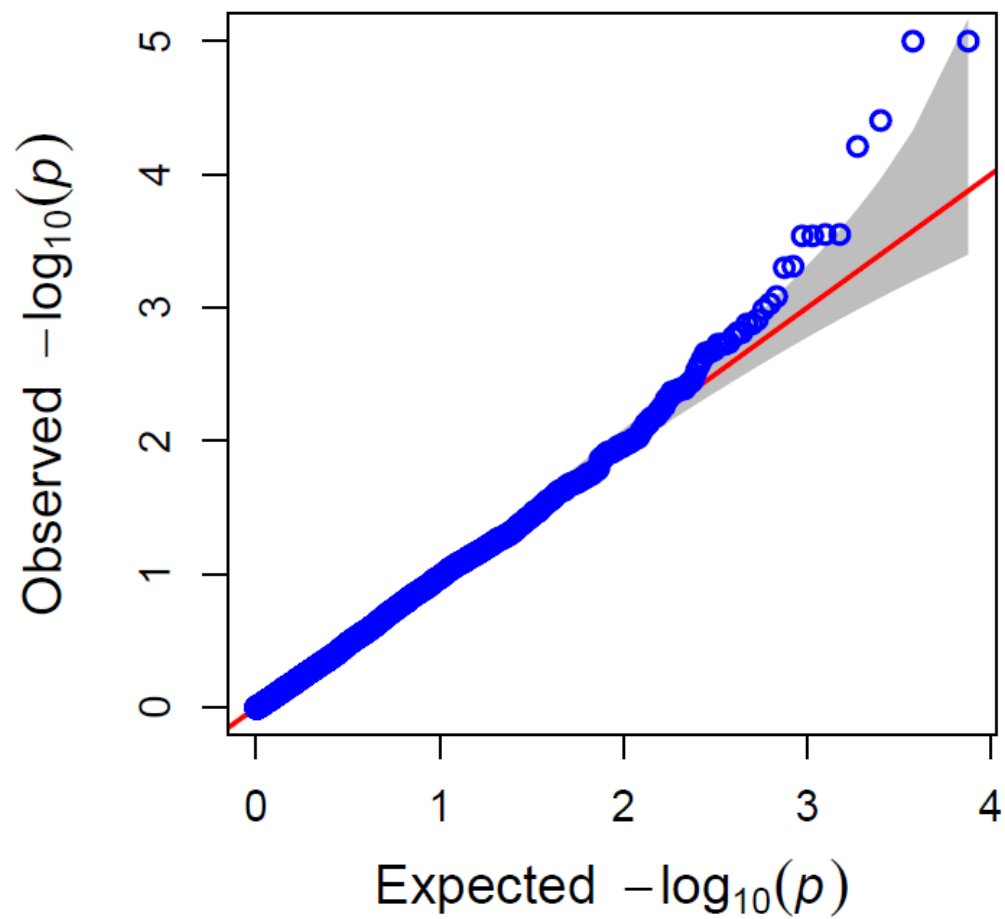

# CMLM.Peonidin

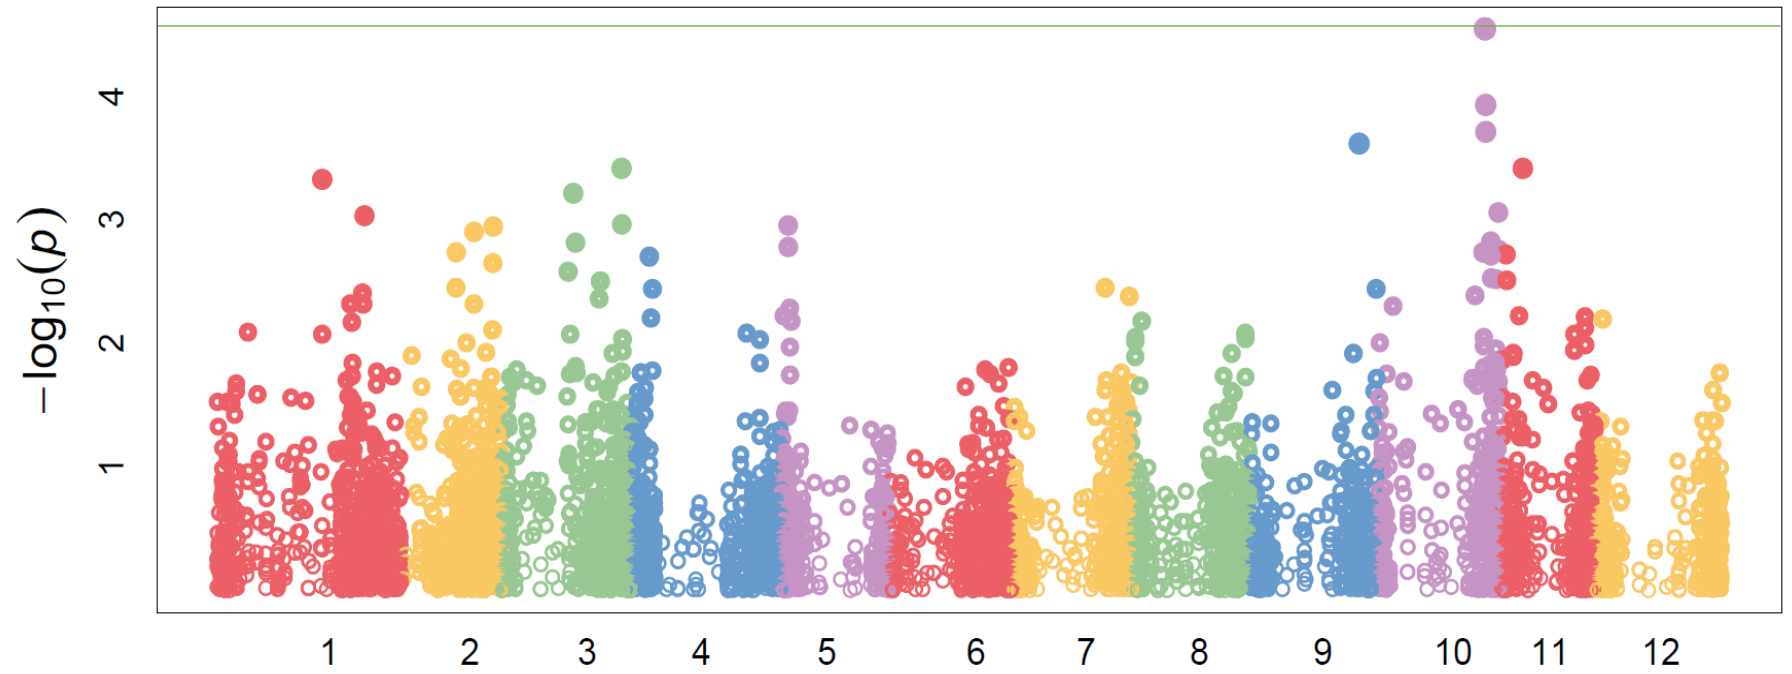

# CMLM.Peonidin

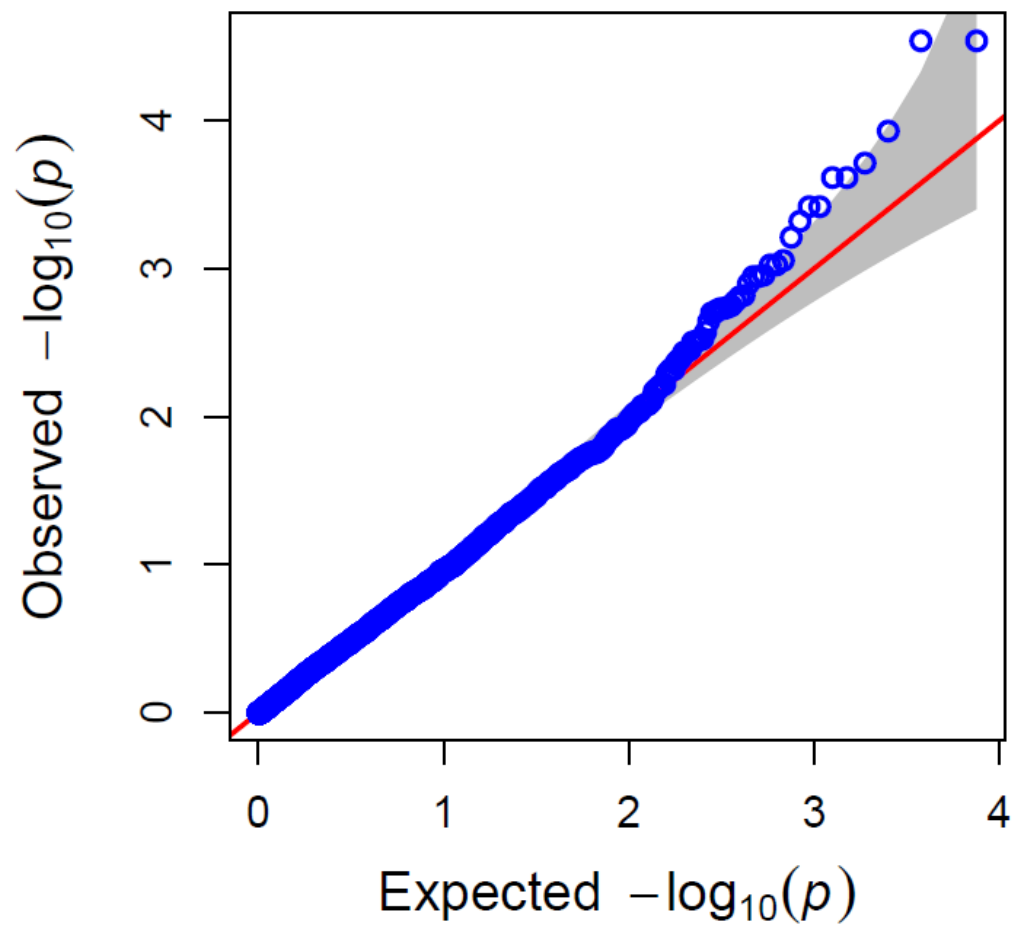

# CMLM.Petunidin

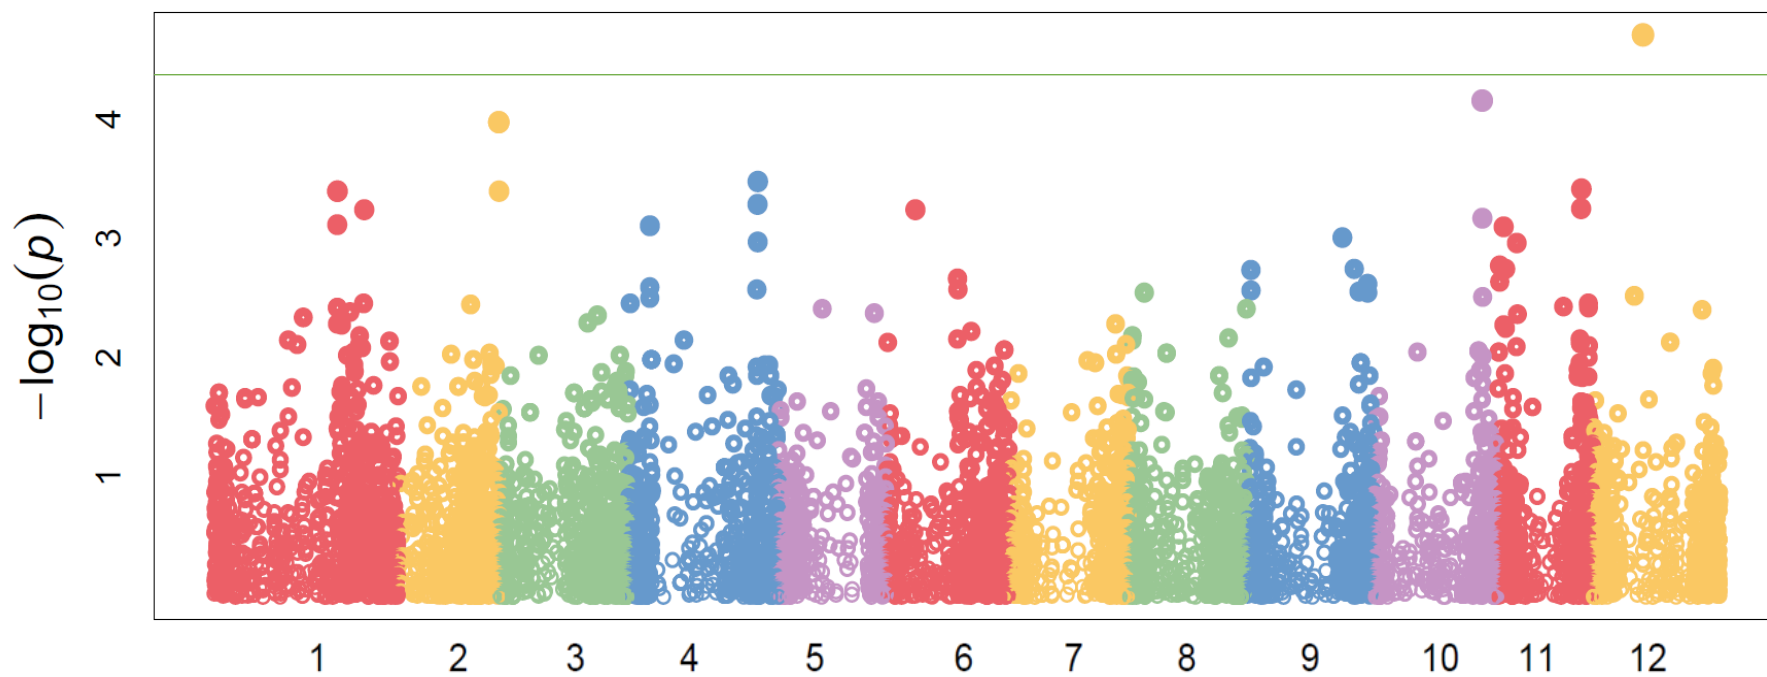

# CMLM.Petunidin

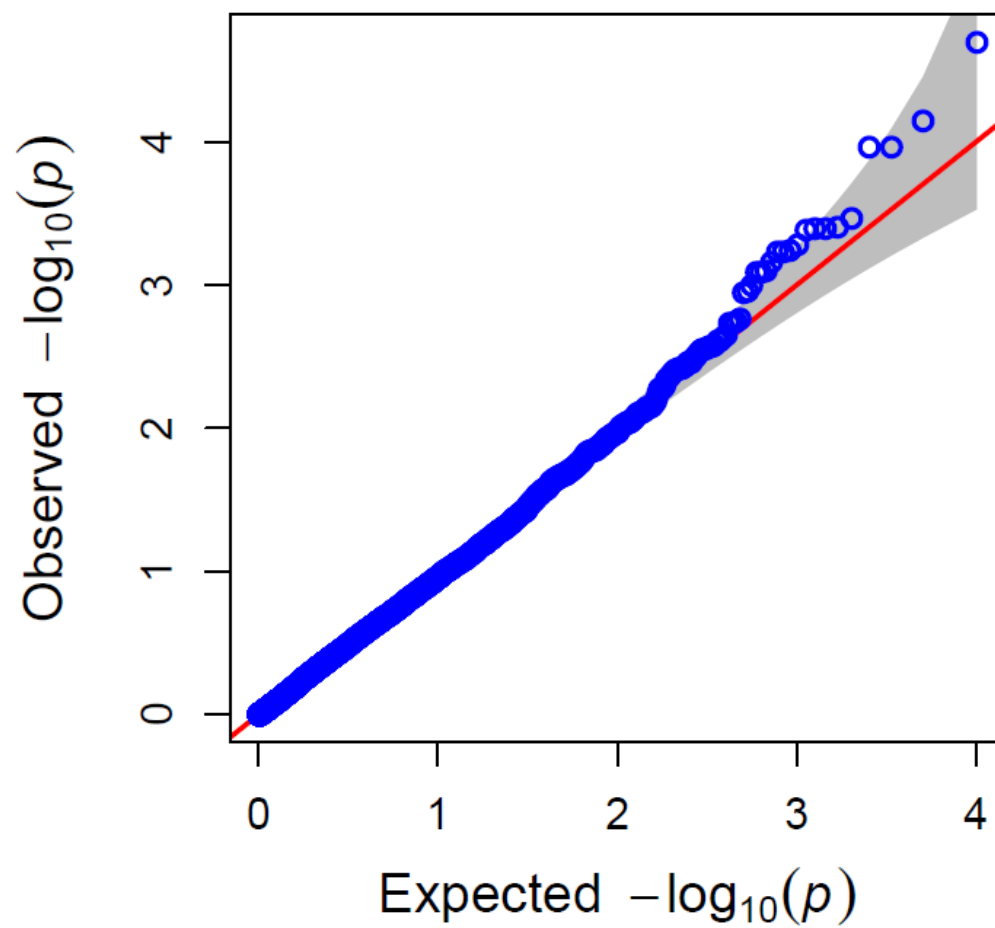

Supplement: s1 [file s1 › Supplementary Material 6_Manhattan graph and QQ plot graph.pdf]
