# Supplementary material
Source: MDPI journal article supplement (https://www.mdpi.com/2073-4395/9/7/366)

**Supplementary material 5.** Chromatograms from HPLC (processed at 520 nm) representative of an accession from each anthocyanidin content profiles or group identified from the phenotyping data. Group 1 (a), group 2 (b), group 3 (c), group 4 (d), group 5 (e) and group 6 (f), according to the cluster analysis. Identification of peaks: 1: delphinidin, 2. Cyanidin, 3. Petunidin, 4. Pelargonidin and 5. Peonidin.

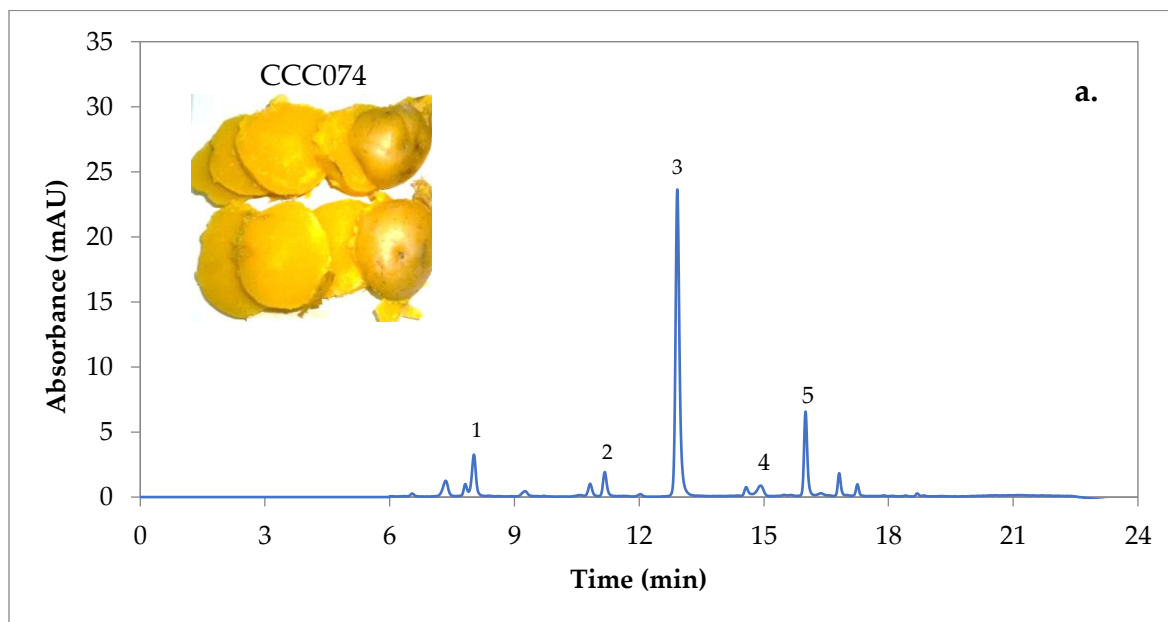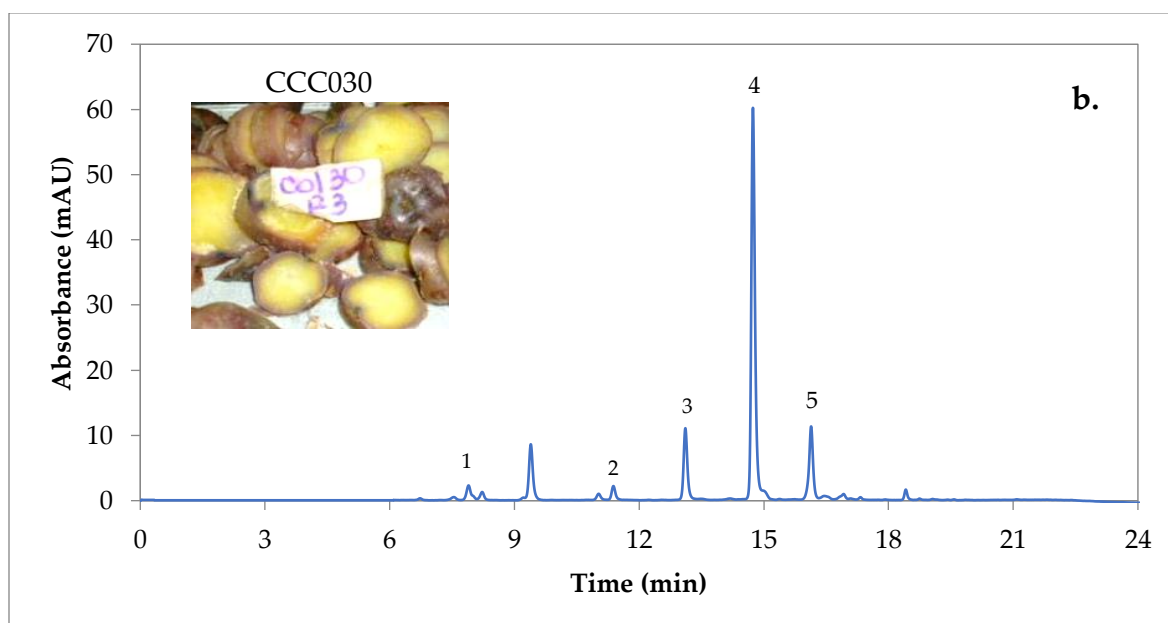

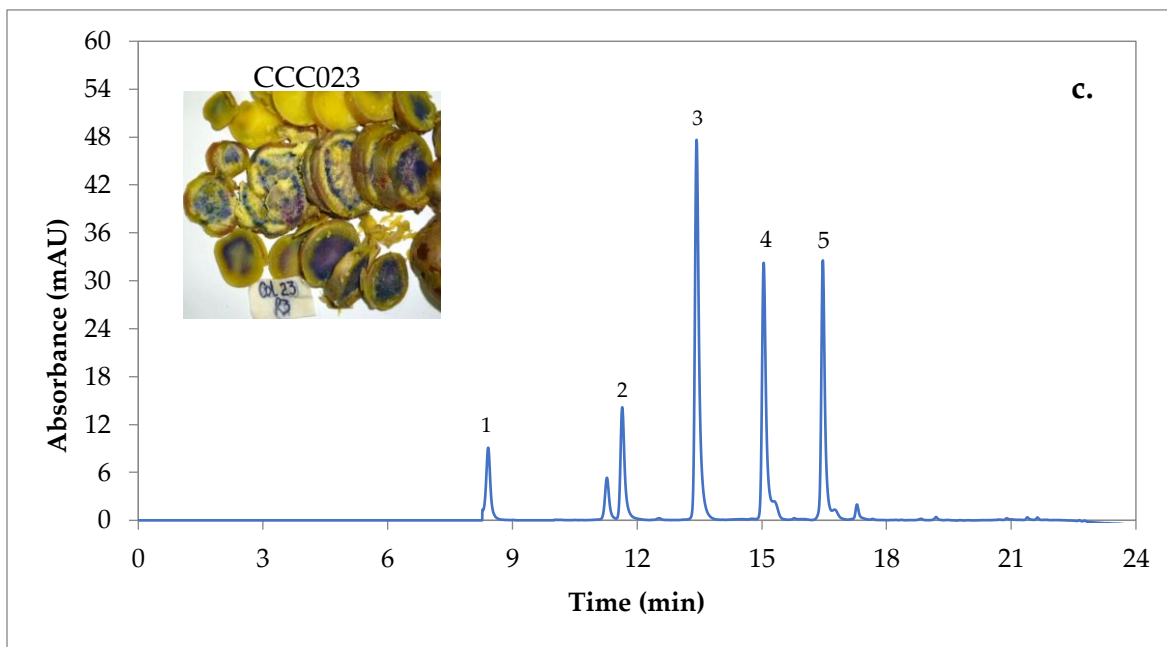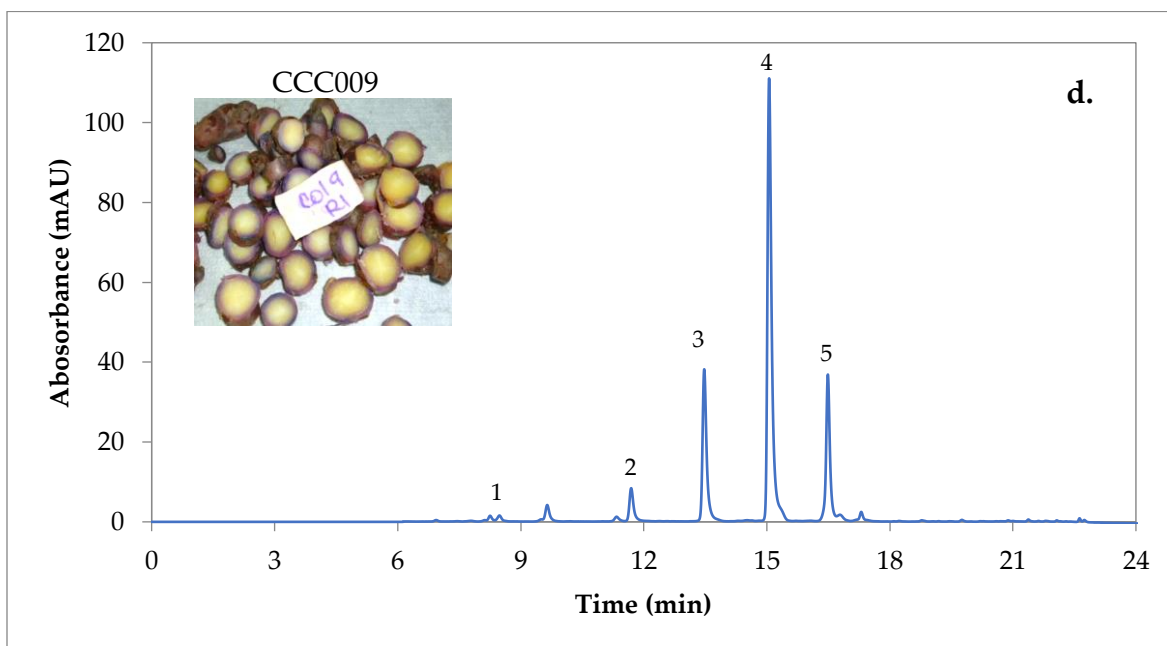

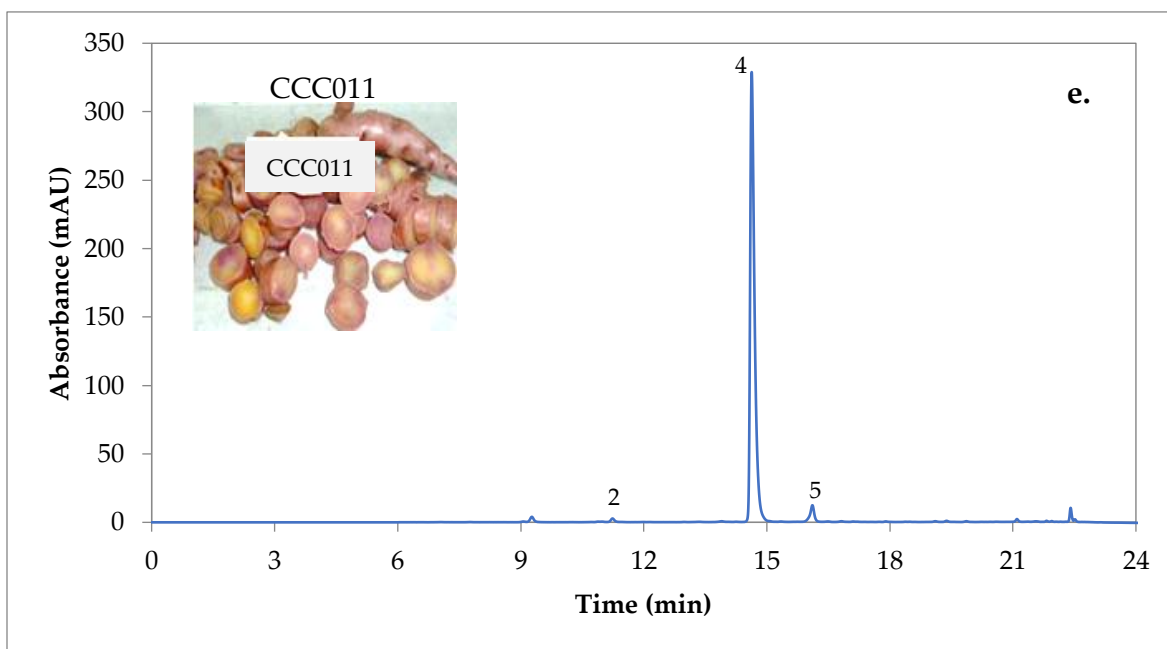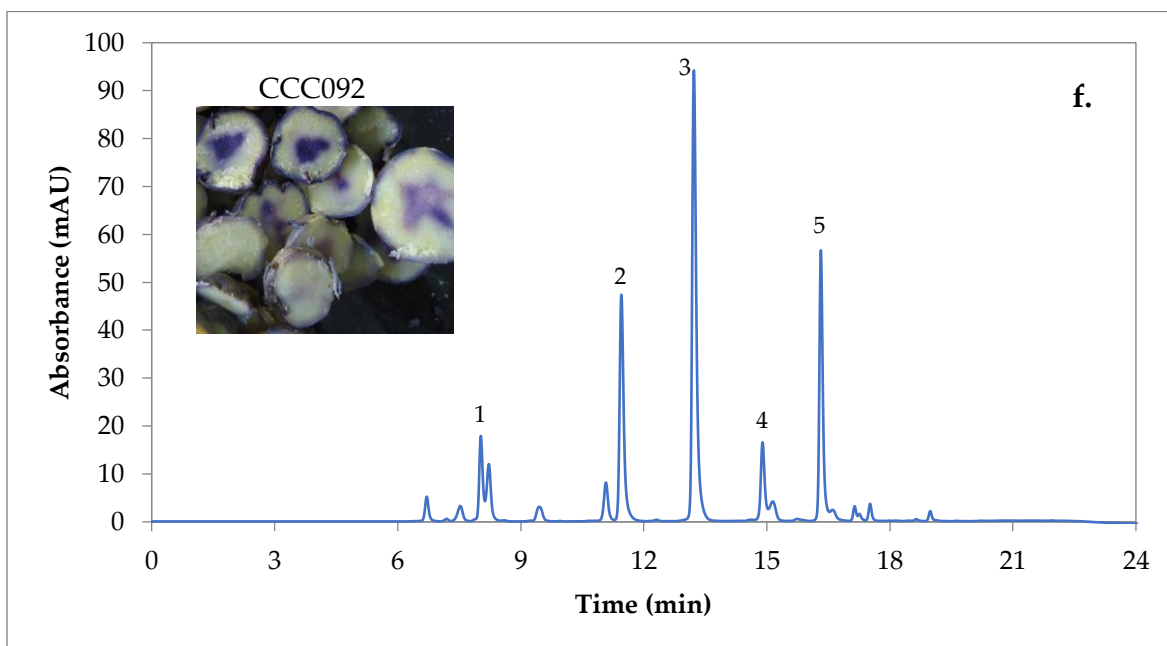

Supplement: s1 [file s1 › Supplentary material 5.pdf]
